# Supplementary material for: RGEN-SEQ FOR HIGHLY SENSITIVE AMPLIFICATION-FREE SCREEN OF OFF-TARGET SITES OF GENE EDITORS
Source: bioRxiv preprint, doi:10.1101/2021.07.01.450795, version 1 (2021-07-02)
Supplement: Supplementary Table s2 [file 450795_file07.xlsx]

## Sheet: AD49ZG_exp1
Chr:Start-End	Cutsite	Score	Cutsite Ends	Strand	PAM	Guide sequence	Mismatches	sgRNA	Cell line	Method
chr0:1020341-1020360	1020357	15	15	sense	NAG	GGCTTTGAACAGAGTGAACG	5	RNA1	AD49ZG	RGEN-seq
chr0:4012686-4012705	4012688	5	5	antisense	NGG	GTCCTGGAACAGAGGGAACG	5	RNA1	AD49ZG	RGEN-seq
chr0:5793472-5793491	5793474	8	7	antisense	NGG	GTGGGGGAGCAGAGTGAAGG	5	RNA1	AD49ZG	RGEN-seq
chr0:14908630-14908649	14908646	152	152	sense	NGG	GGGAGGCAGCAGAGTAACCG	4	RNA1	AD49ZG	RGEN-seq
chr0:21365693-21365712	21365695	3	3	antisense	NAG	CGGGGGGAATGGAGAGACCG	5	RNA1	AD49ZG	RGEN-seq
chr0:24213283-24213302	24213299	6	6	sense	NGG	GGGGGGGTGCAGTGTGACCC	5	RNA1	AD49ZG	RGEN-seq
chr0:26308973-26308992	26308975	38	23	antisense	NAG	TGGAGGGAAGCTAGTGACCG	5	RNA1	AD49ZG	RGEN-seq
chr0:29330003-29330022	29330005	188	187	antisense	NGG	AGGAAAGAACAGACTGACCG	5	RNA1	AD49ZG	RGEN-seq
chr0:48356671-48356690	48356673	27	26	antisense	NAG	TTGCAGGAACAGACTGACCC	5	RNA1	AD49ZG	RGEN-seq
chr0:51606156-51606175	51606172	18	17	sense	NGG	AGGAGGGAACTGAGTGTCCT	5	RNA1	AD49ZG	RGEN-seq
chr0:51610762-51610781	51610764	16	15	antisense	NGG	AGGAGGGAACTGAGTGTCCT	5	RNA1	AD49ZG	RGEN-seq
chr0:54717241-54717260	54717243	4	4	antisense	NGG	TGGTGGGAACAGAGTTTCCA	5	RNA1	AD49ZG	RGEN-seq
chr0:56046741-56046760	56046757	4	4	sense	NGG	GGCAGGGCACAGAGGGACTG	5	RNA1	AD49ZG	RGEN-seq
chr0:59680087-59680106	59680103	27	27	sense	NGG	GGGCACGGTCAGAGTGACCT	5	RNA1	AD49ZG	RGEN-seq
chr0:63757880-63757899	63757882	29	27	antisense	NAG	GGGTGGAGACAGAATGACCT	5	RNA1	AD49ZG	RGEN-seq
chr0:64582780-64582799	64582796	3	3	sense	NGG	GGACTGGAGCAGAGGGACAG	5	RNA1	AD49ZG	RGEN-seq
chr0:84163808-84163827	84163810	50	50	antisense	NGG	TGGTGGGAACGGAGCGACCC	5	RNA1	AD49ZG	RGEN-seq
chr0:88643881-88643900	88643897	29	29	sense	NGG	CTGATGGAATAGAGTGACCG	5	RNA1	AD49ZG	RGEN-seq
chr0:89438497-89438516	89438513	140	140	sense	NGG	GGGGAGGGACAGAAAGACCG	5	RNA1	AD49ZG	RGEN-seq
chr0:90170765-90170784	90170767	10	10	antisense	NAG	TGGCTGGGACAGAGTGACAG	4	RNA1	AD49ZG	RGEN-seq
chr0:98972203-98972222	98972205	207	204	antisense	NGG	GTGTGGGAGCAGAGGGACCT	5	RNA1	AD49ZG	RGEN-seq
chr0:100483653-100483672	100483655	33	29	antisense	NAG	GGGGGAGTACACAGTGACAG	5	RNA1	AD49ZG	RGEN-seq
chr0:101188689-101188708	101188705	170	94	sense	NAG	GGGAGAGAAGAGAGTGACAG	4	RNA1	AD49ZG	RGEN-seq
chr0:121048469-121048488	121048485	14	14	sense	NGG	TGGTGGGAACAGAGTGGATG	5	RNA1	AD49ZG	RGEN-seq
chr0:123511820-123511839	123511836	16	16	sense	NAG	GGAAGAGAACAGGGAGACCG	5	RNA1	AD49ZG	RGEN-seq
chr0:126137160-126137179	126137162	80	79	antisense	NAG	GGGAGGGGACAGAGTCACCT	4	RNA1	AD49ZG	RGEN-seq
chr0:126582028-126582047	126582044	105	105	sense	NGG	GGGTGGGAACATAGAGACAG	4	RNA1	AD49ZG	RGEN-seq
chr0:165055650-165055669	165055652	100	98	antisense	NAG	GGGCAGCAACAGAGAGACCA	4	RNA1	AD49ZG	RGEN-seq
chr0:175466339-175466358	175466355	50	50	sense	NAG	GGGAAGAAACAGAGTGACCT	4	RNA1	AD49ZG	RGEN-seq
chr0:177601229-177601248	177601231	125	123	antisense	NGG	AGCCGGGGACAGAAAGACCG	5	RNA1	AD49ZG	RGEN-seq
chr0:178904186-178904205	178904202	167	167	sense	NGG	GGAAGGGAACAGAGCGACCA	4	RNA1	AD49ZG	RGEN-seq
chr0:181531297-181531316	181531299	38	34	antisense	NGG	CAGCAGGAAGAGAGTGACAG	5	RNA1	AD49ZG	RGEN-seq
chr0:185764645-185764664	185764647	82	82	antisense	NGG	GGGGAGGAACAGAGTAGCCA	5	RNA1	AD49ZG	RGEN-seq
chr0:189516693-189516712	189516709	95	94	sense	NGG	GGGAGGGTATAGAGAGACAG	5	RNA1	AD49ZG	RGEN-seq
chr0:196793864-196793883	196793880	54	48	sense	NGG	GGGAGGGTACAGAGTGGACA	5	RNA1	AD49ZG	RGEN-seq
chr0:197958904-197958923	197958920	87	79	sense	NAG	GGACACGAACAGAGTAACAG	5	RNA1	AD49ZG	RGEN-seq
chr0:209716756-209716775	209716772	107	105	sense	NGG	GGGTAGCAACAGAGAGACTG	5	RNA1	AD49ZG	RGEN-seq
chr0:215485432-215485451	215485434	4	4	antisense	NGG	GGACAGGAAAAGTGTGTCCG	5	RNA1	AD49ZG	RGEN-seq
chr0:249349849-249349868	249349851	8	6	antisense	NAG	GTGGGGAGACAGAGTGACCC	5	RNA1	AD49ZG	RGEN-seq
chr0:264368083-264368102	264368085	139	139	antisense	NGG	GGACGAGCACAGAAAGACCG	5	RNA1	AD49ZG	RGEN-seq
chr0:268689366-268689385	268689368	192	189	antisense	NGG	GGGAAGGCACAGAGAGACTG	5	RNA1	AD49ZG	RGEN-seq
chr0:276882880-276882899	276882882	3	3	antisense	NGG	GGGCGTGGTCAGGGTGACCT	5	RNA1	AD49ZG	RGEN-seq
chr0:279118464-279118483	279118480	15	14	sense	NGG	GGCCAGGAACAGAGAGATTG	5	RNA1	AD49ZG	RGEN-seq
chr0:279735071-279735090	279735087	68	67	sense	NGG	TGGCTGGAATAGAGTGATCA	5	RNA1	AD49ZG	RGEN-seq
chr1:4876572-4876591	4876588	23	23	sense	NAG	AGGTGTGAACATAGTGACCA	5	RNA1	AD49ZG	RGEN-seq
chr1:5629522-5629541	5629524	191	189	antisense	NGG	GGAGGGGGACAGAGAGACAG	5	RNA1	AD49ZG	RGEN-seq
chr1:10595639-10595658	10595641	10	9	antisense	NGG	GGGGAGGAAGAGAGGGACCT	5	RNA1	AD49ZG	RGEN-seq
chr1:14156728-14156747	14156730	39	39	antisense	NGG	GCGCAGGACCAGAGAGATCG	5	RNA1	AD49ZG	RGEN-seq
chr1:16395045-16395064	16395047	91	91	antisense	NGG	GGGGTGGAGCAGAGGGACCA	5	RNA1	AD49ZG	RGEN-seq
chr1:21695557-21695576	21695573	164	163	sense	NGG	CAGAGGGAACAGACTGACCA	5	RNA1	AD49ZG	RGEN-seq
chr1:23452885-23452904	23452901	35	34	sense	NGG	GGCAGGGAGCAGAGTGATCC	5	RNA1	AD49ZG	RGEN-seq
chr1:37090992-37091011	37091008	9	9	sense	NGG	GGGAGAGGACAGAGTCACTG	5	RNA1	AD49ZG	RGEN-seq
chr1:56779213-56779232	56779229	110	110	sense	NGG	GGAAGGGAAAAGAGTCACCT	5	RNA1	AD49ZG	RGEN-seq
chr1:62146356-62146375	62146372	4	4	sense	NGG	GGGCTGGTACACAGTGACAA	5	RNA1	AD49ZG	RGEN-seq
chr1:63726270-63726289	63726272	149	148	antisense	NGG	GGTAGGGATCAGTGTGACCT	5	RNA1	AD49ZG	RGEN-seq
chr1:70591018-70591037	70591034	100	99	sense	NAG	TGGCAGTCACAAAGTGACCG	5	RNA1	AD49ZG	RGEN-seq
chr1:71359041-71359060	71359043	11	11	antisense	NGG	GGGGGGGGACAGAGAAACAG	5	RNA1	AD49ZG	RGEN-seq
chr1:77923131-77923150	77923147	173	173	sense	NGG	AGGCAGGGACAGAGTGACAA	5	RNA1	AD49ZG	RGEN-seq
chr1:78161648-78161667	78161650	7	7	antisense	NAG	GATAGGGAACAGGGTGACTG	5	RNA1	AD49ZG	RGEN-seq
chr1:78799734-78799753	78799736	70	69	antisense	NGG	TGGGGAGAGCAGAGTGACAG	5	RNA1	AD49ZG	RGEN-seq
chr1:82538650-82538669	82538666	3	3	sense	NGG	GGGAGGGAACAGAGTGGGGG	4	RNA1	AD49ZG	RGEN-seq
chr1:88234079-88234098	88234081	135	132	antisense	NGG	GGGAGAGTCCAGAGTGAACG	5	RNA1	AD49ZG	RGEN-seq
chr1:92141677-92141696	92141679	16	16	antisense	NGG	AGGTGGGAACAGAGAGACTT	5	RNA1	AD49ZG	RGEN-seq
chr1:98637338-98637357	98637340	8	5	antisense	NAG	GGTGTGGAGCAGAGTGACCT	5	RNA1	AD49ZG	RGEN-seq
chr1:103005227-103005246	103005243	164	161	sense	NGG	ATGCAGGAACATAGTGAACG	5	RNA1	AD49ZG	RGEN-seq
chr1:103685229-103685248	103685231	7	6	antisense	NAG	TGGCAAGAACAGAGAGACAG	5	RNA1	AD49ZG	RGEN-seq
chr1:113509044-113509063	113509046	5	5	antisense	NAG	GGGAGGGACCAGAGTGAACA	4	RNA1	AD49ZG	RGEN-seq
chr1:113557969-113557988	113557985	15	15	sense	NGG	GCGAGTGAACAGAGAGACCT	5	RNA1	AD49ZG	RGEN-seq
chr1:116348145-116348164	116348161	57	57	sense	NGG	GGAAGAGAACAGAGAGACAG	5	RNA1	AD49ZG	RGEN-seq
chr1:116902395-116902414	116902411	210	209	sense	NGG	GGGAGGGGACAGAATGACAG	4	RNA1	AD49ZG	RGEN-seq
chr1:120093557-120093576	120093559	34	33	antisense	NGG	GTGAGGGAACACAGAGACAG	5	RNA1	AD49ZG	RGEN-seq
chr1:125441182-125441201	125441198	5	5	sense	NGG	GGTAGGGGACAGAGGGAGCG	5	RNA1	AD49ZG	RGEN-seq
chr1:137161581-137161600	137161583	14	13	antisense	NGG	GGGGGGAAAGAGAGAGACCA	5	RNA1	AD49ZG	RGEN-seq
chr1:140256037-140256056	140256053	96	82	sense	NAG	GGAGTGGCACAGAGTGACAG	5	RNA1	AD49ZG	RGEN-seq
chr1:143366802-143366821	143366818	9	7	sense	NGG	GGGAGGGCACAGAGTGAGAG	4	RNA1	AD49ZG	RGEN-seq
chr1:152934167-152934186	152934183	6	6	sense	NGG	GGGTGGGACCAGAGTGCCCC	4	RNA1	AD49ZG	RGEN-seq
chr1:160018968-160018987	160018970	251	251	antisense	NGG	AGGCAAGGACAGAGGGACCG	5	RNA1	AD49ZG	RGEN-seq
chr1:163611381-163611400	163611397	108	108	sense	NGG	GTGAGGGAACAGAGAGCCCT	5	RNA1	AD49ZG	RGEN-seq
chr1:168179103-168179122	168179119	45	45	sense	NGG	GGGGGGAGACAGAGAGACAG	5	RNA1	AD49ZG	RGEN-seq
chr1:198041536-198041555	198041552	12	12	sense	NAG	GGTAAAGGACAGAGTGACCG	5	RNA1	AD49ZG	RGEN-seq
chr1:199766426-199766445	199766442	108	107	sense	NGG	GGGGAGAAACAGAGTGATCA	5	RNA1	AD49ZG	RGEN-seq
chr1:204301202-204301221	204301204	181	179	antisense	NGG	GGGCAGAAACAAAGTGAATG	5	RNA1	AD49ZG	RGEN-seq
chr1:208098616-208098635	208098632	62	62	sense	NGG	GAGGGGGGACAGAGGGACAG	5	RNA1	AD49ZG	RGEN-seq
chr1:210337909-210337928	210337911	196	194	antisense	NAG	TGGCAGGAGCAGAGTGACCT	4	RNA1	AD49ZG	RGEN-seq
chr1:215315196-215315215	215315198	65	62	antisense	NGG	TGGCAGGAAGAGAGTGAACT	5	RNA1	AD49ZG	RGEN-seq
chr1:218408322-218408341	218408324	141	141	antisense	NGG	GAGTGGGAACAGAGAAACAG	5	RNA1	AD49ZG	RGEN-seq
chr1:220069161-220069180	220069177	110	105	sense	NGG	TACCTGGAACAGAGTGACCT	5	RNA1	AD49ZG	RGEN-seq
chr1:220363398-220363417	220363414	58	56	sense	NAG	GGACAGGAACAAAGTGACAG	4	RNA1	AD49ZG	RGEN-seq
chr1:220964335-220964354	220964351	3	3	sense	NAG	TTGCAGGAACAGAGTCACCA	5	RNA1	AD49ZG	RGEN-seq
chr1:222658977-222658996	222658993	10	10	sense	NGG	GGTCATGAAAAGAGTGACCA	5	RNA1	AD49ZG	RGEN-seq
chr1:234153120-234153139	234153136	133	130	sense	NAG	AGGCAGGGACAGAGTGAACA	5	RNA1	AD49ZG	RGEN-seq
chr1:238658647-238658666	238658663	21	20	sense	NAG	GGGCTTGAATAGAGTGACAG	4	RNA1	AD49ZG	RGEN-seq
chr1:247387197-247387216	247387213	84	81	sense	NAG	TGGAGGAGACAGACTGACCG	5	RNA1	AD49ZG	RGEN-seq
chr1:247974357-247974376	247974359	247	244	antisense	NGG	TGGAGAGAACAGAGTGACTA	5	RNA1	AD49ZG	RGEN-seq
chr1:252671807-252671826	252671809	20	19	antisense	NGG	GGGTGGAAAGGGAGTGACCA	5	RNA1	AD49ZG	RGEN-seq
chr1:256214658-256214677	256214660	27	26	antisense	NAG	CAGTGGGAACACAGTGACAG	5	RNA1	AD49ZG	RGEN-seq
chr1:256425325-256425344	256425327	61	61	antisense	NGG	GTCCATGAACAGAGTGACCA	5	RNA1	AD49ZG	RGEN-seq
chr1:259073240-259073259	259073256	63	63	sense	NGG	TGGCTGGAACAAAGTTACCT	5	RNA1	AD49ZG	RGEN-seq
chr1:260416663-260416682	260416679	341	337	sense	NGG	GCAAGGGAACAGAGGGACCA	5	RNA1	AD49ZG	RGEN-seq
chr1:262346827-262346846	262346829	65	65	antisense	NAG	GGCTAGGGACAGAGTGACAG	5	RNA1	AD49ZG	RGEN-seq
chr1:269562813-269562832	269562815	41	29	antisense	NAG	GTGGGGGAAACAAGTGACCG	5	RNA1	AD49ZG	RGEN-seq
chr2:1291689-1291708	1291691	241	237	antisense	NGG	GGGAAGGAACAGAGGGACAG	4	RNA1	AD49ZG	RGEN-seq
chr2:8853641-8853660	8853643	7	6	antisense	NAG	GAGCGTGGACAAAGTGACCA	5	RNA1	AD49ZG	RGEN-seq
chr2:18971189-18971208	18971191	265	264	antisense	NGG	CCTAGGGAACAGAGTGACAG	5	RNA1	AD49ZG	RGEN-seq
chr2:19215387-19215406	19215389	9	9	antisense	NAG	TGGCAGGAACAGTGTGACTG	4	RNA1	AD49ZG	RGEN-seq
chr2:25050377-25050396	25050379	58	56	antisense	NGG	GGGCAGGAACTGTGTGACCT	4	RNA1	AD49ZG	RGEN-seq
chr2:30070092-30070111	30070094	41	38	antisense	NGG	GGGTGGGAGAAGAGTGAACT	5	RNA1	AD49ZG	RGEN-seq
chr2:31807860-31807879	31807862	149	148	antisense	NAG	AGGAGGAAACAGAATGACCA	5	RNA1	AD49ZG	RGEN-seq
chr2:35302895-35302914	35302897	59	58	antisense	NAG	CACTGGGAACAGAGTGACCC	5	RNA1	AD49ZG	RGEN-seq
chr2:53388825-53388844	53388827	32	32	antisense	NGG	GGGAGGAAACACGGTGACCC	5	RNA1	AD49ZG	RGEN-seq
chr2:53453274-53453293	53453290	7	7	sense	NGG	GTGGGAGAGCAGAGTGACCC	5	RNA1	AD49ZG	RGEN-seq
chr2:54077603-54077622	54077619	53	53	sense	NGG	GGGAGCAATCAGAGTGACCT	5	RNA1	AD49ZG	RGEN-seq
chr2:57102176-57102195	57102192	39	35	sense	NGG	AGCGGGGAACAGAGAGACGG	5	RNA1	AD49ZG	RGEN-seq
chr2:64285820-64285839	64285836	5	5	sense	NGG	AGGCGAGAAGAGCGTGACCA	5	RNA1	AD49ZG	RGEN-seq
chr2:66456422-66456441	66456424	244	241	antisense	NGG	GGTCAGGTACAGAGGGACCA	5	RNA1	AD49ZG	RGEN-seq
chr2:77932140-77932159	77932142	3	3	antisense	NAG	GGGTAGGAAGAGAGTAACCT	5	RNA1	AD49ZG	RGEN-seq
chr2:81247531-81247550	81247547	8	7	sense	NGG	GGGCCAGAACATAGTGACAA	5	RNA1	AD49ZG	RGEN-seq
chr2:89029427-89029446	89029443	12	12	sense	NGG	GGGGAGGGGCAGAGTGACAG	5	RNA1	AD49ZG	RGEN-seq
chr2:91459347-91459366	91459363	3	3	sense	NGG	GGGAGAGAAGACAGTGACAG	5	RNA1	AD49ZG	RGEN-seq
chr2:93168117-93168136	93168133	5	5	sense	NGG	GGGCTGATACAGAGGGACTG	5	RNA1	AD49ZG	RGEN-seq
chr2:93727314-93727333	93727316	8	8	antisense	NAG	GGGCATGGTCAGAGTGACCA	5	RNA1	AD49ZG	RGEN-seq
chr2:95705029-95705048	95705031	7	6	antisense	NGG	GAGAGGGAACAGAGGGATCA	5	RNA1	AD49ZG	RGEN-seq
chr2:97664246-97664265	97664262	16	16	sense	NAG	TTGCGGAAACAGAGTAACAG	5	RNA1	AD49ZG	RGEN-seq
chr2:98816559-98816578	98816575	24	20	sense	NGG	GAGCAGGAAGAGAGTGACAC	5	RNA1	AD49ZG	RGEN-seq
chr2:104180206-104180225	104180222	3	3	sense	NGG	GAGAGGGAACAGAATGAGAG	5	RNA1	AD49ZG	RGEN-seq
chr2:106243185-106243204	106243201	9	9	sense	NAG	AGTAAGGAACAGAGTGACTG	5	RNA1	AD49ZG	RGEN-seq
chr2:106896397-106896416	106896413	228	227	sense	NGG	GGACAGGGACACAGTGACTG	5	RNA1	AD49ZG	RGEN-seq
chr2:117198358-117198377	117198360	210	210	antisense	NGG	GAGAGGGAACACAGAGACCT	5	RNA1	AD49ZG	RGEN-seq
chr2:117235019-117235038	117235021	96	96	antisense	NGG	AGGCTGGGACAGGATGACCG	5	RNA1	AD49ZG	RGEN-seq
chr2:117613545-117613564	117613561	64	47	sense	NGG	AAGCTGGAAGAGAGTGACTG	5	RNA1	AD49ZG	RGEN-seq
chr2:118693266-118693285	118693282	26	24	sense	NGG	GCGCAGGACCAGAGAGATCG	5	RNA1	AD49ZG	RGEN-seq
chr2:118801031-118801050	118801047	60	59	sense	NGG	GGGAAGGAACAGAGTAACAA	5	RNA1	AD49ZG	RGEN-seq
chr2:121697818-121697837	121697820	228	225	antisense	NGG	GGGAGGGCACAGTGTGACTA	5	RNA1	AD49ZG	RGEN-seq
chr2:126789701-126789720	126789703	10	10	antisense	NGG	GAGAGGCAACAGAGTGGCAG	5	RNA1	AD49ZG	RGEN-seq
chr2:132639458-132639477	132639474	32	30	sense	NGG	GGGCTTGATCAGAGTGACAG	4	RNA1	AD49ZG	RGEN-seq
chr2:139464473-139464492	139464475	52	52	antisense	NGG	AGGAGGGAACAGAATGGCCT	5	RNA1	AD49ZG	RGEN-seq
chr2:142766621-142766640	142766623	146	145	antisense	NGG	CGGAGGAGACAGAGTGACGG	5	RNA1	AD49ZG	RGEN-seq
chr2:144302401-144302420	144302417	81	67	sense	NAG	GAGCTGGTACAGAGTGACAG	4	RNA1	AD49ZG	RGEN-seq
chr2:148823034-148823053	148823050	49	48	sense	NGG	GGGCATGAACAGAGAGATCC	5	RNA1	AD49ZG	RGEN-seq
chr2:151149087-151149106	151149089	10	10	antisense	NGG	GAGTGGGAACAGAGTGGGAG	5	RNA1	AD49ZG	RGEN-seq
chr2:153608331-153608350	153608347	15	8	sense	NAG	GGGAGTGGGCAGAGTGACTG	5	RNA1	AD49ZG	RGEN-seq
chr2:177861989-177862008	177862005	5	5	sense	NAG	GAGTGGGGACACAGAGACCG	5	RNA1	AD49ZG	RGEN-seq
chr2:188143336-188143355	188143338	152	150	antisense	NGG	CACCGGGGACAGAGTGACTG	5	RNA1	AD49ZG	RGEN-seq
chr2:213082779-213082798	213082781	4	4	antisense	NAG	GGGCTTAAAAAGAGTGACCT	5	RNA1	AD49ZG	RGEN-seq
chr2:219830135-219830154	219830151	237	234	sense	NGG	AGAAGGGAGCAGAGTGAGCG	5	RNA1	AD49ZG	RGEN-seq
chr2:231145848-231145867	231145864	51	50	sense	NGG	GAGTGGGTGCAGAGTGACCA	5	RNA1	AD49ZG	RGEN-seq
chr2:231313356-231313375	231313358	174	171	antisense	NGG	AGGAGGGAACAGAGAGACAA	5	RNA1	AD49ZG	RGEN-seq
chr2:232115692-232115711	232115708	83	82	sense	NGG	GGGAGGGTCCAGAGTGAACA	5	RNA1	AD49ZG	RGEN-seq
chr2:232249053-232249072	232249055	12	12	antisense	NGG	GGTAAGAAACAGAGTGTCCG	5	RNA1	AD49ZG	RGEN-seq
chr2:238750434-238750453	238750436	70	70	antisense	NGG	GCGCAGGACCAGAGAGATCG	5	RNA1	AD49ZG	RGEN-seq
chr2:258010349-258010368	258010351	55	55	antisense	NGG	GAGCGGGAACAGAGAAACAG	4	RNA1	AD49ZG	RGEN-seq
chr2:273622779-273622798	273622795	20	20	sense	NGG	AGGCGTGGTCAGAGTGACCT	5	RNA1	AD49ZG	RGEN-seq
chr2:278726796-278726815	278726798	131	99	antisense	NAG	AGGAGAGAAGAGAGTGACAG	5	RNA1	AD49ZG	RGEN-seq
chr2:288964110-288964129	288964126	175	173	sense	NGG	TGGCGGGGACAGAGCGACCT	4	RNA1	AD49ZG	RGEN-seq
chr2:290477826-290477845	290477828	133	133	antisense	NAG	GGGAAAGAACAAAATGACCG	5	RNA1	AD49ZG	RGEN-seq
chr2:290827777-290827796	290827779	20	17	antisense	NGG	GAGCAGGTAAAGAGTGACAG	5	RNA1	AD49ZG	RGEN-seq
chr2:297767597-297767616	297767599	124	123	antisense	NGG	AGCGGGGAACAGAGAGACAG	5	RNA1	AD49ZG	RGEN-seq
chr2:300926186-300926205	300926202	59	59	sense	NAG	GGGAGGAAACAGAGAGACCT	4	RNA1	AD49ZG	RGEN-seq
chr2:304173267-304173286	304173283	212	209	sense	NGG	TACCTGGAACAGAGTGACCT	5	RNA1	AD49ZG	RGEN-seq
chr2:317044979-317044998	317044995	57	57	sense	NGG	GAGAGGGAAAAGAGAGAACG	5	RNA1	AD49ZG	RGEN-seq
chr2:318217071-318217090	318217073	4	3	antisense	NGG	GGGCTGGAAATCAGTGACCA	5	RNA1	AD49ZG	RGEN-seq
chr2:333071270-333071289	333071286	135	135	sense	NGG	AGGAGAGAACAGAGGGACAG	5	RNA1	AD49ZG	RGEN-seq
chr2:337622065-337622084	337622067	18	16	antisense	NGG	AGTGGGGAACAGAGAGACGG	5	RNA1	AD49ZG	RGEN-seq
chr2:337622248-337622267	337622250	27	26	antisense	NGG	AGTGGGGAACAGAGAGACGG	5	RNA1	AD49ZG	RGEN-seq
chr2:338112421-338112440	338112423	11	11	antisense	NGG	GGGGAGGAGCAGAGTGGACG	5	RNA1	AD49ZG	RGEN-seq
chr2:344087242-344087261	344087258	187	184	sense	NGG	TGATGGAAACAGAGTGACCT	5	RNA1	AD49ZG	RGEN-seq
chr2:348890438-348890457	348890440	373	366	antisense	NAG	GGTAGGGAACAGAGTGACCT	3	RNA1	AD49ZG	RGEN-seq
chr2:354697558-354697577	354697560	408	403	antisense	NGG	CAGTGGGAACAGAGTGACCT	4	RNA1	AD49ZG	RGEN-seq
chr2:357108898-357108917	357108914	102	100	sense	NGG	AGGCTGGCACAGAGGGACCA	5	RNA1	AD49ZG	RGEN-seq
chr2:371580466-371580485	371580482	123	121	sense	NGG	CAGCAGGAAGAGAGTGACCC	5	RNA1	AD49ZG	RGEN-seq
chr2:376963605-376963624	376963621	263	262	sense	NGG	AGCAGGGAACAGAGAGACAG	5	RNA1	AD49ZG	RGEN-seq
chr2:383996865-383996884	383996881	64	58	sense	NAG	CGTTGAGAACAGAGTGCCCG	5	RNA1	AD49ZG	RGEN-seq
chr2:384355423-384355442	384355425	92	91	antisense	NAG	TGGCTGGAACAGAGAGACCA	4	RNA1	AD49ZG	RGEN-seq
chr2:393402497-393402516	393402499	310	309	antisense	NGG	GGCCATGAACAAAGTGACCA	5	RNA1	AD49ZG	RGEN-seq
chr2:396302844-396302863	396302846	7	7	antisense	NGG	GGGTGGGAACAGAGATCCCA	5	RNA1	AD49ZG	RGEN-seq
chr2:396549260-396549279	396549276	180	180	sense	NGG	GGGTGGGAACAGAGTGCCCT	3	RNA1	AD49ZG	RGEN-seq
chr2:405395798-405395817	405395814	3	3	sense	NGG	TGGCAGGAGGAGAGTGAGCG	5	RNA1	AD49ZG	RGEN-seq
chr2:405720468-405720487	405720484	5	5	sense	NGG	GGGAGGGGACAGACAGAACG	5	RNA1	AD49ZG	RGEN-seq
chr2:418638997-418639016	418638999	10	10	antisense	NAG	AGGTGGGAACAGGATGACCC	5	RNA1	AD49ZG	RGEN-seq
chr2:422557314-422557333	422557316	132	130	antisense	NAG	GGGAAGTAACAGAGTGACTA	5	RNA1	AD49ZG	RGEN-seq
chr2:423436988-423437007	423436990	93	93	antisense	NGG	GGGATGGAGCAGAGTGAATG	5	RNA1	AD49ZG	RGEN-seq
chr2:423728589-423728608	423728591	72	70	antisense	NGG	GGGAAGGTACGGAGTGACAG	5	RNA1	AD49ZG	RGEN-seq
chr2:424742799-424742818	424742801	99	99	antisense	NGG	GGGAGGGGAAAGAGTGTCCG	4	RNA1	AD49ZG	RGEN-seq
chr2:431687328-431687347	431687330	248	247	antisense	NGG	GGTTAGGAACAGACTGACCT	5	RNA1	AD49ZG	RGEN-seq
chr2:431835916-431835935	431835932	8	8	sense	NAG	AGGCGGGGACAGAGGGACCC	4	RNA1	AD49ZG	RGEN-seq
chr2:447818201-447818220	447818203	63	63	antisense	NAG	GGGGAGGAACAGAGAAACCC	5	RNA1	AD49ZG	RGEN-seq
chr2:449558269-449558288	449558285	4	4	sense	NGG	GGGTGGAAACAGAGTGGGTG	5	RNA1	AD49ZG	RGEN-seq
chr2:449959336-449959355	449959352	181	181	sense	NAG	CCGCGGGATCACAGTGACCG	4	RNA1	AD49ZG	RGEN-seq
chr2:450116703-450116722	450116705	29	29	antisense	NGG	GTGGGGGAACAGGCTGACCA	5	RNA1	AD49ZG	RGEN-seq
chr2:451225886-451225905	451225902	8	8	sense	NGG	GGGGAGGAACAGACAGACAG	5	RNA1	AD49ZG	RGEN-seq
chr2:451849255-451849274	451849271	37	37	sense	NGG	GGGCTGGAAAGGAGTAACCA	5	RNA1	AD49ZG	RGEN-seq
chr2:458063427-458063446	458063429	109	47	antisense	NGG	GGAGGGGTACAGAGAGACCC	5	RNA1	AD49ZG	RGEN-seq
chr2:458282469-458282488	458282485	20	19	sense	NGG	GGTCGAGAACAGAGAGAATG	5	RNA1	AD49ZG	RGEN-seq
chr2:458906118-458906137	458906120	96	95	antisense	NGG	GGGCTGGAGCAGAATGACAG	4	RNA1	AD49ZG	RGEN-seq
chr2:462780198-462780217	462780214	4	4	sense	NGG	AGGCGGGTACAGAGAGATGG	5	RNA1	AD49ZG	RGEN-seq
chr2:464497179-464497198	464497195	4	4	sense	NGG	TGCTTGCAACAGAGTGACCG	5	RNA1	AD49ZG	RGEN-seq
chr3:1642768-1642787	1642784	30	29	sense	NAG	AGGCTGGCACAGAGAGACCA	5	RNA1	AD49ZG	RGEN-seq
chr3:3402366-3402385	3402368	52	52	antisense	NGG	GGGCAGGAACAGAATATCCT	5	RNA1	AD49ZG	RGEN-seq
chr3:6797482-6797501	6797498	211	208	sense	NGG	GAGAGGGAACAGAGGGACCT	4	RNA1	AD49ZG	RGEN-seq
chr3:10247671-10247690	10247673	8	8	antisense	NGG	GACCAGGAACAGAGTGGCAG	5	RNA1	AD49ZG	RGEN-seq
chr3:10677101-10677120	10677103	4	4	antisense	NAG	GGGAGGGAAAAGGGTGACCT	4	RNA1	AD49ZG	RGEN-seq
chr3:18831314-18831333	18831316	50	44	antisense	NGG	GGGTGGGGACAGAGGGACTG	4	RNA1	AD49ZG	RGEN-seq
chr3:19852803-19852822	19852819	46	45	sense	NGG	GCCCTGGAACAGAGAGATCG	5	RNA1	AD49ZG	RGEN-seq
chr3:26814325-26814344	26814341	53	47	sense	NGG	AGCGGGGAACAGAGAGACGG	5	RNA1	AD49ZG	RGEN-seq
chr3:34295535-34295554	34295551	25	25	sense	NAG	GTTCAAGAACAGAGTGACCT	5	RNA1	AD49ZG	RGEN-seq
chr3:40928379-40928398	40928395	32	32	sense	NGG	GGTTGGAAACAGAGTGATCC	5	RNA1	AD49ZG	RGEN-seq
chr3:42738135-42738154	42738151	155	154	sense	NGG	GAGCAGGAACTCAGTGACCT	5	RNA1	AD49ZG	RGEN-seq
chr3:44479217-44479236	44479219	9	9	antisense	NAG	GGGCAGGAAGGGAGTGACAC	5	RNA1	AD49ZG	RGEN-seq
chr3:47943399-47943418	47943415	325	322	sense	NGG	TGGAGGGAACAGGATGACCA	5	RNA1	AD49ZG	RGEN-seq
chr3:49989561-49989580	49989577	61	61	sense	NGG	GAGCAGGAACAGAGGGATCC	5	RNA1	AD49ZG	RGEN-seq
chr3:64895291-64895310	64895307	3	3	sense	NGG	GGGCATGATCAGAGTGACGT	5	RNA1	AD49ZG	RGEN-seq
chr3:67511413-67511432	67511415	14	13	antisense	NAG	GGAGGGCAACAGAGAGACAG	5	RNA1	AD49ZG	RGEN-seq
chr3:69078537-69078556	69078553	35	35	sense	NGG	CGTCGAGAGCAGAGTGACCC	5	RNA1	AD49ZG	RGEN-seq
chr3:72277886-72277905	72277902	88	87	sense	NGG	GGGAGGGACCAGAGTATCCT	5	RNA1	AD49ZG	RGEN-seq
chr3:77192694-77192713	77192710	38	38	sense	NGG	GCCCTGGAACAGAGTGAATG	5	RNA1	AD49ZG	RGEN-seq
chr3:80866460-80866479	80866462	96	93	antisense	NGG	GGACGGAGACAGGGTGACCT	5	RNA1	AD49ZG	RGEN-seq
chr3:98152723-98152742	98152739	20	18	sense	NAG	GGCGAGGAGCAGAGTGACTG	5	RNA1	AD49ZG	RGEN-seq
chr3:107090386-107090405	107090402	278	277	sense	NGG	GGGAGAGTCCAGAGTGACCA	5	RNA1	AD49ZG	RGEN-seq
chr3:108517403-108517422	108517405	19	19	antisense	NAG	GGGAGGAAAAAGAGAGACCT	5	RNA1	AD49ZG	RGEN-seq
chr3:108793328-108793347	108793344	28	28	sense	NAG	GGGAAGGAGCAGAGAGACCT	5	RNA1	AD49ZG	RGEN-seq
chr3:118583934-118583953	118583950	15	15	sense	NAG	AGGGAGGATCAGAGTGACCC	5	RNA1	AD49ZG	RGEN-seq
chr3:127783687-127783706	127783689	7	7	antisense	NGG	GGACGGGGACAGAGTGAGGG	4	RNA1	AD49ZG	RGEN-seq
chr3:128087446-128087465	128087462	70	69	sense	NGG	GGAAGGGGACTGAGTGACTG	5	RNA1	AD49ZG	RGEN-seq
chr3:128111028-128111047	128111044	47	47	sense	NGG	GGGTGGGATCATAGAGACCT	5	RNA1	AD49ZG	RGEN-seq
chr3:128221469-128221488	128221485	9	9	sense	NGG	GTGTGGGGACAGAGTTACCT	5	RNA1	AD49ZG	RGEN-seq
chr3:135673437-135673456	135673453	17	17	sense	NGG	AGTTGGGAACAGAGTGAGCA	5	RNA1	AD49ZG	RGEN-seq
chr3:138984095-138984114	138984111	16	16	sense	NAG	GGGAGAGAACAGAGTGGCCA	4	RNA1	AD49ZG	RGEN-seq
chr3:139446558-139446577	139446560	4	4	antisense	NGG	TGGTGGGAACAGAGTGCCTC	5	RNA1	AD49ZG	RGEN-seq
chr3:142143966-142143985	142143968	3	3	antisense	NAG	AGGGGGGAATAGAGAGACAG	5	RNA1	AD49ZG	RGEN-seq
chr3:142797120-142797139	142797136	26	26	sense	NAG	CAGGGGGAACAGTGTGACTG	5	RNA1	AD49ZG	RGEN-seq
chr3:144611537-144611556	144611553	27	26	sense	NGG	GGGCTGGGTCACAGTGACCT	5	RNA1	AD49ZG	RGEN-seq
chr3:147889186-147889205	147889202	339	221	sense	NGG	GGGTGGAAACAGGGTGACCT	4	RNA1	AD49ZG	RGEN-seq
chr3:149691042-149691061	149691058	51	51	sense	NGG	TGGCGGGCACAAAGTGTCCT	5	RNA1	AD49ZG	RGEN-seq
chr3:150411698-150411717	150411700	303	303	antisense	NGG	AGAAGTGAACAGAGTGAACG	5	RNA1	AD49ZG	RGEN-seq
chr3:153772083-153772102	153772085	7	7	antisense	NAG	GGAATAGAACAGAGTGACTG	5	RNA1	AD49ZG	RGEN-seq
chr3:154454535-154454554	154454551	31	30	sense	NAG	CCTTGGGAACAGAGTGACAG	5	RNA1	AD49ZG	RGEN-seq
chr3:158157055-158157074	158157057	5	5	antisense	NAG	CAGCAGGAACAGAGTGTCCT	5	RNA1	AD49ZG	RGEN-seq
chr3:161729501-161729520	161729503	16	13	antisense	NGG	GGGTGGAAACAGTGTGACAC	5	RNA1	AD49ZG	RGEN-seq
chr3:162952485-162952504	162952487	227	226	antisense	NGG	GTGAGGGAACACAGTAACCC	5	RNA1	AD49ZG	RGEN-seq
chr3:165764370-165764389	165764386	103	103	sense	NGG	GGGAAGCATCAGAGTGACCA	5	RNA1	AD49ZG	RGEN-seq
chr3:166275708-166275727	166275710	73	58	antisense	NGG	AGCGGGGAACAGAGAGACGG	5	RNA1	AD49ZG	RGEN-seq
chr3:170138872-170138891	170138888	65	65	sense	NAG	TGGGGTGAACAGAGTGACAG	4	RNA1	AD49ZG	RGEN-seq
chr3:176001748-176001767	176001750	4	3	antisense	NAG	AGGAGGGAATGGAGTGACCA	5	RNA1	AD49ZG	RGEN-seq
chr3:183331040-183331059	183331042	11	11	antisense	NGG	GAGCGCGCACAGAGAGACAG	5	RNA1	AD49ZG	RGEN-seq
chr3:188778492-188778511	188778508	26	25	sense	NAG	GGATGGGGAAAGAGTGACCC	5	RNA1	AD49ZG	RGEN-seq
chr3:190538092-190538111	190538094	207	207	antisense	NGG	TGGAGGGAACACACTGACCC	5	RNA1	AD49ZG	RGEN-seq
chr3:192644938-192644957	192644940	38	36	antisense	NGG	AGGGGGGAAGAGAGAGACAG	5	RNA1	AD49ZG	RGEN-seq
chr3:197246616-197246635	197246632	18	17	sense	NAG	AGTCGGTAACAGAGTGACTG	4	RNA1	AD49ZG	RGEN-seq
chr3:198343231-198343250	198343233	233	231	antisense	NGG	GGAAGGGTACAGGGTGACTG	5	RNA1	AD49ZG	RGEN-seq
chr3:198915954-198915973	198915956	34	34	antisense	NGG	GGGCAGAAACAGAATGACTC	5	RNA1	AD49ZG	RGEN-seq
chr3:200009476-200009495	200009478	225	221	antisense	NGG	TGATGGGAACAGAGTGACTT	5	RNA1	AD49ZG	RGEN-seq
chr3:204636916-204636935	204636932	5	5	sense	NGG	GAGGGGGAACAGAGAGGCTG	5	RNA1	AD49ZG	RGEN-seq
chr3:205830011-205830030	205830013	8	8	antisense	NGG	GGGCAGGAGAAGAATGACTG	5	RNA1	AD49ZG	RGEN-seq
chr3:207135782-207135801	207135798	114	114	sense	NGG	GAGCGGGTACACAGTGCCCA	5	RNA1	AD49ZG	RGEN-seq
chr3:208792716-208792735	208792718	5	5	antisense	NAG	GGACTGGAGCAGAGTGACAG	4	RNA1	AD49ZG	RGEN-seq
chr3:210985694-210985713	210985696	57	57	antisense	NAG	GGGAAAGAACACAGTGACAG	5	RNA1	AD49ZG	RGEN-seq
chr3:211718946-211718965	211718948	4	4	antisense	NAG	GTGCAGGAGCACAGTGACCC	5	RNA1	AD49ZG	RGEN-seq
chr3:215541332-215541351	215541348	162	160	sense	NGG	GGAAGGGAGCCAAGTGACCG	5	RNA1	AD49ZG	RGEN-seq
chr3:215832542-215832561	215832558	23	19	sense	NAG	CGGCGGCAGAAGAGTGACTG	5	RNA1	AD49ZG	RGEN-seq
chr3:216931065-216931084	216931067	173	172	antisense	NGG	TGGGATGAACAGAGTGACCA	5	RNA1	AD49ZG	RGEN-seq
chr3:220635319-220635338	220635321	4	3	antisense	NGG	GAGAGGGAACAGAGCAACAG	5	RNA1	AD49ZG	RGEN-seq
chr3:220766396-220766415	220766398	208	205	antisense	NAG	GGGCAGGGGAAGAGTGACCG	4	RNA1	AD49ZG	RGEN-seq
chr3:222036828-222036847	222036830	36	36	antisense	NAG	AAGAGGGGAGAGAGTGACCG	5	RNA1	AD49ZG	RGEN-seq
chr3:228221015-228221034	228221017	265	263	antisense	NGG	GGAAGGGTCCAGAGTGAACG	5	RNA1	AD49ZG	RGEN-seq
chr3:234210227-234210246	234210229	138	134	antisense	NGG	AGGAGGGAAGACAGAGACCG	5	RNA1	AD49ZG	RGEN-seq
chr3:235473053-235473072	235473069	40	39	sense	NGG	GGGCAGTCACAGAGGGACAG	5	RNA1	AD49ZG	RGEN-seq
chr3:243946311-243946330	243946313	63	63	antisense	NAG	GCCATAGAACAGAGTGACCG	5	RNA1	AD49ZG	RGEN-seq
chr3:257189390-257189409	257189406	139	139	sense	NAG	GGGAGGAAGCAGAGAGACCA	5	RNA1	AD49ZG	RGEN-seq
chr3:262941358-262941377	262941360	12	12	antisense	NGG	GTCAGGGAACAGAGTGGCTG	5	RNA1	AD49ZG	RGEN-seq
chr3:277423346-277423365	277423362	33	32	sense	NAG	GGGAGGGAACAGAAAGACCA	4	RNA1	AD49ZG	RGEN-seq
chr4:2140271-2140290	2140287	7	7	sense	NAG	GGGAAAGAACAGAATGACCC	5	RNA1	AD49ZG	RGEN-seq
chr4:3475399-3475418	3475415	3	3	sense	NAG	AGGAGGGAGCAGAGAGACAG	5	RNA1	AD49ZG	RGEN-seq
chr4:5840744-5840763	5840760	345	341	sense	NGG	GAAAGGGAACTGAGTGACAG	5	RNA1	AD49ZG	RGEN-seq
chr4:5851444-5851463	5851460	20	20	sense	NGG	AGGAGCCAACAGAATGACCG	5	RNA1	AD49ZG	RGEN-seq
chr4:11400437-11400456	11400453	9	9	sense	NGG	GGAAGGTAGAAGAGTGACCG	5	RNA1	AD49ZG	RGEN-seq
chr4:19966112-19966131	19966114	9	9	antisense	NAG	GAGCAAGAACAAAGTGACAG	5	RNA1	AD49ZG	RGEN-seq
chr4:20236335-20236354	20236351	12	12	sense	NGG	GCATGGGAACAGAGTGAGCC	5	RNA1	AD49ZG	RGEN-seq
chr4:30065812-30065831	30065828	397	393	sense	NGG	GGGAAGAAACAGAGAGACTG	5	RNA1	AD49ZG	RGEN-seq
chr4:32558713-32558732	32558715	3	3	antisense	NGG	GGGTGGAAACAGAGTGCCAT	5	RNA1	AD49ZG	RGEN-seq
chr4:37163681-37163700	37163683	20	20	antisense	NAG	GGGTGGGAACAGAGTGAAGG	3	RNA1	AD49ZG	RGEN-seq
chr4:42301861-42301880	42301863	19	19	antisense	NGG	AGGCGGGACTAGAGGGACAG	5	RNA1	AD49ZG	RGEN-seq
chr4:44688867-44688886	44688883	8	8	sense	NGG	GCGCGGGGACAAAGCGACTG	5	RNA1	AD49ZG	RGEN-seq
chr4:45341698-45341717	45341714	31	30	sense	NGG	TGGTGGAAACAGAGTGGCAG	5	RNA1	AD49ZG	RGEN-seq
chr4:45414284-45414303	45414286	13	13	antisense	NAG	AGGCAGGAAAAGGGTGACCA	5	RNA1	AD49ZG	RGEN-seq
chr4:51788105-51788124	51788107	10	7	antisense	NGG	AGGTGGGGACAGAGAGACGG	5	RNA1	AD49ZG	RGEN-seq
chr4:53958620-53958639	53958636	45	44	sense	NGG	TGCTGGGATCAGAGTGACAG	5	RNA1	AD49ZG	RGEN-seq
chr4:73934922-73934941	73934924	72	72	antisense	NGG	AGGAGGGTACAGAGTGAGCA	5	RNA1	AD49ZG	RGEN-seq
chr4:77407969-77407988	77407971	30	30	antisense	NGG	GGGGGAGAAGAGAGTGACAG	4	RNA1	AD49ZG	RGEN-seq
chr4:78566225-78566244	78566227	30	29	antisense	NGG	GGGCGTGGTCAGAGTGACCT	4	RNA1	AD49ZG	RGEN-seq
chr4:82180434-82180453	82180436	121	119	antisense	NGG	AAGAGGGACCAGAGTGGCCG	5	RNA1	AD49ZG	RGEN-seq
chr4:82244650-82244669	82244666	237	233	sense	NAG	GGGAAAGGACAGAGTGACCA	5	RNA1	AD49ZG	RGEN-seq
chr4:87849631-87849650	87849633	17	17	antisense	NGG	GGGGAGCAACAGTGTGACCC	5	RNA1	AD49ZG	RGEN-seq
chr4:98376184-98376203	98376200	6	5	sense	NAG	GTGAGGGGACAGAGTGAGCG	4	RNA1	AD49ZG	RGEN-seq
chr4:112177167-112177186	112177183	6	4	sense	NGG	GGGAGGGAACAGAGTGGCGT	4	RNA1	AD49ZG	RGEN-seq
chr4:113771053-113771072	113771055	21	21	antisense	NAG	TGGAGAGAACACAGTGACCT	5	RNA1	AD49ZG	RGEN-seq
chr4:123030207-123030226	123030209	4	3	antisense	NAG	GGCCTGGGACAGAGTGAAAG	5	RNA1	AD49ZG	RGEN-seq
chr4:123042135-123042154	123042137	157	129	antisense	NGG	GGGCAGGAGCAGAGTGAACC	4	RNA1	AD49ZG	RGEN-seq
chr4:125804355-125804374	125804357	44	43	antisense	NAG	GGGCGTGGTCAGAGTGACCG	3	RNA1	AD49ZG	RGEN-seq
chr4:126173224-126173243	126173226	3	3	antisense	NGG	GAGTGGGCACAGAGTGGCCC	5	RNA1	AD49ZG	RGEN-seq
chr4:134717541-134717560	134717557	3	3	sense	NGG	GGGCTGTCACAGAGTGGCCA	5	RNA1	AD49ZG	RGEN-seq
chr4:144115533-144115552	144115549	5	5	sense	NAG	GGGTGGAAACTGAATGACCA	5	RNA1	AD49ZG	RGEN-seq
chr4:144175397-144175416	144175413	4	4	sense	NGG	GGGTAGGAACAGACTGATCT	5	RNA1	AD49ZG	RGEN-seq
chr4:147799089-147799108	147799091	29	29	antisense	NGG	GGGCAGCATCAAAGTGACTG	5	RNA1	AD49ZG	RGEN-seq
chr4:151372771-151372790	151372787	14	14	sense	NGG	GAGAGGGACCTGAGGGACCG	5	RNA1	AD49ZG	RGEN-seq
chr4:153023742-153023761	153023744	17	17	antisense	NGG	GGGCGTGATCAGAGTGACGT	4	RNA1	AD49ZG	RGEN-seq
chr4:155188074-155188093	155188076	3	3	antisense	NGG	GTGAGGGCACAGAGGGTCCG	5	RNA1	AD49ZG	RGEN-seq
chr4:157776372-157776391	157776374	85	82	antisense	NAG	AGGTGGGAATAGAGTGACTG	4	RNA1	AD49ZG	RGEN-seq
chr4:159000694-159000713	159000710	25	25	sense	NGG	GTGTGGGCACAGAGTGACCC	4	RNA1	AD49ZG	RGEN-seq
chr4:170204855-170204874	170204871	12	12	sense	NAG	GTGTGGTGACAGAGTGACCA	5	RNA1	AD49ZG	RGEN-seq
chr4:170283470-170283489	170283486	5	5	sense	NAG	GAGTGGGCAAAGAGTGACCG	4	RNA1	AD49ZG	RGEN-seq
chr4:181279340-181279359	181279356	12	9	sense	NAG	AGGTGGAAACAGGGTGACTG	5	RNA1	AD49ZG	RGEN-seq
chr4:182768333-182768352	182768335	53	47	antisense	NAG	AGGCTGGTGCAGAGTGACAG	5	RNA1	AD49ZG	RGEN-seq
chr4:187304215-187304234	187304231	251	204	sense	NAG	GAGAGGGAACAGAGAGACCA	4	RNA1	AD49ZG	RGEN-seq
chr4:187413491-187413510	187413507	220	212	sense	NGG	CTGTGGGAACAGAGTGACAA	5	RNA1	AD49ZG	RGEN-seq
chr4:187868363-187868382	187868379	6	4	sense	NGG	TGGAGGGAAGAGAGTGAAGG	5	RNA1	AD49ZG	RGEN-seq
chr4:189143061-189143080	189143063	322	320	antisense	NGG	GGGAAAGAAAAGAGAGACCG	5	RNA1	AD49ZG	RGEN-seq
chr4:198213649-198213668	198213665	63	62	sense	NGG	AGGCACCAACAGAGTGACAG	5	RNA1	AD49ZG	RGEN-seq
chr4:199140532-199140551	199140548	30	29	sense	NGG	GGGCGGTCACAGGGTGAACG	4	RNA1	AD49ZG	RGEN-seq
chr4:202987802-202987821	202987818	319	318	sense	NGG	AGGTGGAGACAGAGTGACTG	5	RNA1	AD49ZG	RGEN-seq
chr4:208195001-208195020	208195017	207	205	sense	NGG	GGACAGAAACAGAGTGACCT	4	RNA1	AD49ZG	RGEN-seq
chr4:210225153-210225172	210225169	67	40	sense	NAG	AGGAGGGAGGAGAGTGACTG	5	RNA1	AD49ZG	RGEN-seq
chr4:225940122-225940141	225940124	5	5	antisense	NGG	GGGCAGGAGCAGAATGACGG	4	RNA1	AD49ZG	RGEN-seq
chr5:3109253-3109272	3109269	6	6	sense	NGG	GGGTGGGAACAGACTGGCCT	4	RNA1	AD49ZG	RGEN-seq
chr5:7051264-7051283	7051280	239	232	sense	NGG	AGGCAGGAATTGAGTGACCC	5	RNA1	AD49ZG	RGEN-seq
chr5:7966180-7966199	7966196	32	23	sense	NGG	CAGCAGGAAGAGAGTGACAG	5	RNA1	AD49ZG	RGEN-seq
chr5:9121164-9121183	9121166	84	84	antisense	NGG	GAGCAGGCACAGAGAGACCC	5	RNA1	AD49ZG	RGEN-seq
chr5:13218137-13218156	13218153	242	240	sense	NGG	TGGCTGGAACTGAGTAACCA	5	RNA1	AD49ZG	RGEN-seq
chr5:26627401-26627420	26627403	10	10	antisense	NGG	GGGAGGAAACTGAGAGACAG	5	RNA1	AD49ZG	RGEN-seq
chr5:37722381-37722400	37722397	79	75	sense	NGG	AGGCTGGAACTCAGTGACCC	5	RNA1	AD49ZG	RGEN-seq
chr5:38183993-38184012	38184009	110	107	sense	NGG	GAGCGAGAAAAGAGTGATCT	5	RNA1	AD49ZG	RGEN-seq
chr5:40732634-40732653	40732636	237	234	antisense	NAG	AGGGAGAAACAAAGTGACCG	5	RNA1	AD49ZG	RGEN-seq
chr5:51688596-51688615	51688612	98	96	sense	NGG	GGCAAAGAACAGAGTGACCC	5	RNA1	AD49ZG	RGEN-seq
chr5:52834241-52834260	52834257	90	88	sense	NGG	GGGCCAGTACACAGTGACCT	5	RNA1	AD49ZG	RGEN-seq
chr5:53691789-53691808	53691791	215	211	antisense	NGG	GGGTGGGAGCAGAGGGACCT	4	RNA1	AD49ZG	RGEN-seq
chr5:74656987-74657006	74657003	63	61	sense	NGG	GGGCTGGAATAGAGTGATTG	4	RNA1	AD49ZG	RGEN-seq
chr5:77258046-77258065	77258062	61	56	sense	NAG	GGGCTGGCACAAAGTGACAG	4	RNA1	AD49ZG	RGEN-seq
chr5:91921848-91921867	91921850	38	38	antisense	NGG	TGGCTGGTACAGAGGGACCC	5	RNA1	AD49ZG	RGEN-seq
chr5:96925897-96925916	96925899	4	4	antisense	NAG	GCGGGGAAACAGAGAGACAG	5	RNA1	AD49ZG	RGEN-seq
chr5:97626081-97626100	97626097	11	11	sense	NGG	GGGCTTGAACAGAGTAAAAG	5	RNA1	AD49ZG	RGEN-seq
chr5:100769729-100769748	100769745	28	28	sense	NAG	GGGCATGGACAGGGTGACCT	5	RNA1	AD49ZG	RGEN-seq
chr5:102483002-102483021	102483004	25	24	antisense	NGG	GGGAGGGTACAAAGGGACAG	5	RNA1	AD49ZG	RGEN-seq
chr5:103634627-103634646	103634643	113	113	sense	NGG	AGGAAGGAACCGAGGGACCG	5	RNA1	AD49ZG	RGEN-seq
chr5:109565226-109565245	109565228	76	75	antisense	NGG	GGGAAGGAGCAGGGTGACAG	5	RNA1	AD49ZG	RGEN-seq
chr5:117774158-117774177	117774174	10	10	sense	NGG	GGGAGGGGAGAGAGGGACCT	5	RNA1	AD49ZG	RGEN-seq
chr5:125125535-125125554	125125537	4	3	antisense	NAG	GGGCGTGGTCAGAGTGACAT	5	RNA1	AD49ZG	RGEN-seq
chr5:131340264-131340283	131340266	9	7	antisense	NGG	GGGCGTGGTCAGGGTGACCT	5	RNA1	AD49ZG	RGEN-seq
chr5:139604583-139604602	139604599	146	144	sense	NAG	GGCTGGGAACAGAGAGACTA	5	RNA1	AD49ZG	RGEN-seq
chr5:146781088-146781107	146781104	65	61	sense	NGG	AGCGGGGAACAGAGAGACGG	5	RNA1	AD49ZG	RGEN-seq
chr5:153174339-153174358	153174355	172	172	sense	NGG	GGGTGGGAAGAGAGTGACCT	3	RNA1	AD49ZG	RGEN-seq
chr5:159290106-159290125	159290108	236	235	antisense	NGG	GGCTGGGGACACAGTGACCT	5	RNA1	AD49ZG	RGEN-seq
chr5:163261513-163261532	163261529	132	130	sense	NGG	GGCTGGGAACACAGTGTCCT	5	RNA1	AD49ZG	RGEN-seq
chr5:169307744-169307763	169307760	74	67	sense	NGG	AGCGGGGAACAGAGAGACGG	5	RNA1	AD49ZG	RGEN-seq
chr5:170605422-170605441	170605424	13	13	antisense	NAG	AAACGGGAACGGAGTGACCC	5	RNA1	AD49ZG	RGEN-seq
chr5:172296789-172296808	172296805	241	233	sense	NGG	GGCTGGGAGCAGAGTGACTG	4	RNA1	AD49ZG	RGEN-seq
chr5:176784428-176784447	176784444	65	64	sense	NGG	AGGAGGCACCAGAGTGACTG	5	RNA1	AD49ZG	RGEN-seq
chr5:178088781-178088800	178088797	76	75	sense	NGG	GGGAGGAAGGAGAGAGACCG	5	RNA1	AD49ZG	RGEN-seq
chr5:183683771-183683790	183683773	114	111	antisense	NGG	GGCAGGATACAGAGTGACAG	5	RNA1	AD49ZG	RGEN-seq
chr5:195063592-195063611	195063608	7	6	sense	NGG	GGGCGTGGTCAGGGTGACCT	5	RNA1	AD49ZG	RGEN-seq
chr5:195108638-195108657	195108654	225	222	sense	NGG	CAGCAGGAAAAGAGTGACAG	5	RNA1	AD49ZG	RGEN-seq
chr5:196565371-196565390	196565373	7	7	antisense	NGG	GAGCGGAAAGAGAGTGTACG	5	RNA1	AD49ZG	RGEN-seq
chr5:197582149-197582168	197582165	5	5	sense	NAG	TGGGGGAAACAGAGAGACAG	5	RNA1	AD49ZG	RGEN-seq
chr5:197896956-197896975	197896958	28	28	antisense	NGG	GGGTGGGGCTAGAGTGACAG	5	RNA1	AD49ZG	RGEN-seq
chr5:199414214-199414233	199414216	37	37	antisense	NAG	GGGAGGCACCAGAGTGACCA	4	RNA1	AD49ZG	RGEN-seq
chr5:203082173-203082192	203082189	152	150	sense	NAG	GGAAGGGAAGAGAGTGACCA	4	RNA1	AD49ZG	RGEN-seq
chr5:211957839-211957858	211957841	278	273	antisense	NGG	GTCCGAGAACAGAGAGACAG	5	RNA1	AD49ZG	RGEN-seq
chr5:214409481-214409500	214409483	144	144	antisense	NGG	TGGCAGACACAGAATGACCG	5	RNA1	AD49ZG	RGEN-seq
chr6:1298210-1298229	1298212	241	237	antisense	NAG	TTGCAGGAACATAGTGACCA	5	RNA1	AD49ZG	RGEN-seq
chr6:5022784-5022803	5022800	5	4	sense	NGG	GGGCTGGTACAGATGGACCC	5	RNA1	AD49ZG	RGEN-seq
chr6:10667631-10667650	10667633	61	43	antisense	NGG	GGATGGGAAGAGGGAGACCG	5	RNA1	AD49ZG	RGEN-seq
chr6:14151686-14151705	14151688	20	20	antisense	NGG	GGGGGGGAAAAAGGTGACCT	5	RNA1	AD49ZG	RGEN-seq
chr6:16748746-16748765	16748762	174	169	sense	NAG	GAATAGGATCAGAGTGACCG	5	RNA1	AD49ZG	RGEN-seq
chr6:17133490-17133509	17133492	46	46	antisense	NGG	GGGGCAGAGCAGAGTGACAG	5	RNA1	AD49ZG	RGEN-seq
chr6:19569824-19569843	19569826	16	11	antisense	NAG	GGGAGAATAGAGAGTGACCG	5	RNA1	AD49ZG	RGEN-seq
chr6:33271089-33271108	33271105	84	84	sense	NGG	GAGGGAGAACAGAGGGACAG	5	RNA1	AD49ZG	RGEN-seq
chr6:35817706-35817725	35817722	124	124	sense	NGG	GGGAGGAAGCAGAGTGGCCT	5	RNA1	AD49ZG	RGEN-seq
chr6:45229439-45229458	45229441	102	100	antisense	NGG	AGGCCGGAGCAGAGTGAACA	5	RNA1	AD49ZG	RGEN-seq
chr6:51815953-51815972	51815955	66	66	antisense	NAG	AGGTGGGAAAAGAGTAACCA	5	RNA1	AD49ZG	RGEN-seq
chr6:53865363-53865382	53865365	316	313	antisense	NGG	GGACAGGAAAAGAGTGACTG	4	RNA1	AD49ZG	RGEN-seq
chr6:56098271-56098290	56098287	20	20	sense	NGG	GCACAGCAACAGAGTGACTG	5	RNA1	AD49ZG	RGEN-seq
chr6:60025838-60025857	60025840	34	34	antisense	NGG	GCGTGGGGACAGAGGGACAG	5	RNA1	AD49ZG	RGEN-seq
chr6:64979359-64979378	64979361	89	87	antisense	NGG	GGGAGGGAACAGAGAGGCCT	4	RNA1	AD49ZG	RGEN-seq
chr6:65054731-65054750	65054733	25	25	antisense	NAG	GGGCAGTACCACAGTGACCT	5	RNA1	AD49ZG	RGEN-seq
chr6:65062705-65062724	65062721	44	34	sense	NGG	CAGCTGGAACAGAGTGACAC	5	RNA1	AD49ZG	RGEN-seq
chr6:65252979-65252998	65252981	19	19	antisense	NGG	GAGTGGGATAAGAGTGACCC	5	RNA1	AD49ZG	RGEN-seq
chr6:65639830-65639849	65639832	77	77	antisense	NGG	GGGAGGCAGCAGAGTAACCG	4	RNA1	AD49ZG	RGEN-seq
chr6:66328186-66328205	66328188	109	108	antisense	NGG	GAGAGGGGACAGAGTGTCCC	5	RNA1	AD49ZG	RGEN-seq
chr6:70756801-70756820	70756817	5	5	sense	NAG	AGGCTGGAGCAGAGGGACCA	5	RNA1	AD49ZG	RGEN-seq
chr6:74277704-74277723	74277706	55	51	antisense	NGG	AGCGGGGAACAGAGAGACGG	5	RNA1	AD49ZG	RGEN-seq
chr6:74455481-74455500	74455483	226	226	antisense	NGG	GAGAGGGAACAATGTGCCCG	5	RNA1	AD49ZG	RGEN-seq
chr6:74998278-74998297	74998294	4	4	sense	NAG	GGACAGGGACAGAGAGACGG	5	RNA1	AD49ZG	RGEN-seq
chr6:89125584-89125603	89125600	7	6	sense	NAG	GGGAGGAAACTGAGTAACCC	5	RNA1	AD49ZG	RGEN-seq
chr6:89794929-89794948	89794931	125	124	antisense	NGG	AGGTGGGGACAGGGTGACTG	5	RNA1	AD49ZG	RGEN-seq
chr6:91396913-91396932	91396929	3	3	sense	NGG	GGGTGGGCACAGAGTGTCTA	5	RNA1	AD49ZG	RGEN-seq
chr6:91718256-91718275	91718258	7	6	antisense	NGG	GGGCGTGGTCAGGGTGACCT	5	RNA1	AD49ZG	RGEN-seq
chr6:93408224-93408243	93408226	6	3	antisense	NAG	GGCGGGGAGCAGAGTGACTG	4	RNA1	AD49ZG	RGEN-seq
chr6:93502771-93502790	93502773	20	20	antisense	NGG	AGGAGGGAACAAAGTGGCAG	5	RNA1	AD49ZG	RGEN-seq
chr6:95106165-95106184	95106167	22	22	antisense	NAG	TGTGGGAAGCAGAGTGACCG	5	RNA1	AD49ZG	RGEN-seq
chr6:96100550-96100569	96100566	5	5	sense	NGG	GGGGTGGGACACAGTGCCCG	5	RNA1	AD49ZG	RGEN-seq
chr6:97096941-97096960	97096943	258	253	antisense	NGG	AGGAGGGAGCAGAGGGACTG	5	RNA1	AD49ZG	RGEN-seq
chr6:97443706-97443725	97443722	4	4	sense	NGG	TGGGGTGAGCAGAGTGACCC	5	RNA1	AD49ZG	RGEN-seq
chr6:98180641-98180660	98180657	26	16	sense	NAG	GAGGGCGGTCAGAGTGACCG	5	RNA1	AD49ZG	RGEN-seq
chr6:103714789-103714808	103714791	32	31	antisense	NGG	AGCCGGGAACAGAGGACCCG	5	RNA1	AD49ZG	RGEN-seq
chr6:105668517-105668536	105668533	419	411	sense	NGG	GGGCAGAGTCAGAGAGACCG	5	RNA1	AD49ZG	RGEN-seq
chr6:110909024-110909043	110909040	66	65	sense	NAG	GGGCAGGAATAGAGAGACCT	4	RNA1	AD49ZG	RGEN-seq
chr6:114331201-114331220	114331203	300	295	antisense	NGG	GGACAAGATCAGAGTGACTG	5	RNA1	AD49ZG	RGEN-seq
chr6:117688886-117688905	117688902	4	4	sense	NGG	GGGCGTGGCCAGGGTGACCT	5	RNA1	AD49ZG	RGEN-seq
chr6:132372845-132372864	132372847	6	6	antisense	NGG	GAGTGGGAACAGAGTGCTTG	5	RNA1	AD49ZG	RGEN-seq
chr6:134992764-134992783	134992780	207	203	sense	NGG	GGGAGGAGACAGAAGGACCG	5	RNA1	AD49ZG	RGEN-seq
chr6:140356983-140357002	140356999	6	4	sense	NGG	TGGCGGCAACAGGGAGACCC	5	RNA1	AD49ZG	RGEN-seq
chr6:146795615-146795634	146795631	51	51	sense	NGG	GGGAGGCAAAGGAGTGACCA	5	RNA1	AD49ZG	RGEN-seq
chr6:147221032-147221051	147221034	381	379	antisense	NGG	GAGCGGGAACAGAGAAACAG	4	RNA1	AD49ZG	RGEN-seq
chr6:150879920-150879939	150879922	51	49	antisense	NAG	GGCATGGAACAGAATGACCC	5	RNA1	AD49ZG	RGEN-seq
chr6:152922605-152922624	152922607	37	37	antisense	NGG	GGGAGGGAGCAGAGGGGCCG	4	RNA1	AD49ZG	RGEN-seq
chr6:153447037-153447056	153447053	153	152	sense	NGG	TTGTGAGAACAGAGTGACTG	5	RNA1	AD49ZG	RGEN-seq
chr6:153549882-153549901	153549884	19	18	antisense	NAG	GGGAGGAAATAGAGGGACCC	5	RNA1	AD49ZG	RGEN-seq
chr6:153611200-153611219	153611216	9	9	sense	NAG	GGGAGGGAACAGAGAAACTC	5	RNA1	AD49ZG	RGEN-seq
chr6:155849380-155849399	155849382	12	12	antisense	NGG	AGTGGGGAACAGAGAGACGG	5	RNA1	AD49ZG	RGEN-seq
chr6:158566250-158566269	158566266	247	175	sense	NGG	GGGAGGCAACAGAGGGACCT	4	RNA1	AD49ZG	RGEN-seq
chr6:159306530-159306549	159306546	9	9	sense	NGG	GGTGGGGCACAGAATGACTG	5	RNA1	AD49ZG	RGEN-seq
chr7:103973-103992	103975	178	167	antisense	NGG	AGCGGGGAACAGAGAGACGG	5	RNA1	AD49ZG	RGEN-seq
chr7:2698511-2698530	2698513	83	77	antisense	NGG	AGCGGGGAACAGAGAGACGG	5	RNA1	AD49ZG	RGEN-seq
chr7:4696303-4696322	4696305	311	311	antisense	NGG	TGGAAGGAACAGAGTGGCCG	4	RNA1	AD49ZG	RGEN-seq
chr7:5165822-5165841	5165824	5	3	antisense	NAG	GGTCAAGGACAGAGTGACTG	5	RNA1	AD49ZG	RGEN-seq
chr7:12806292-12806311	12806308	288	288	sense	NGG	AGGCAGAAACAGAGAGACCC	5	RNA1	AD49ZG	RGEN-seq
chr7:13281218-13281237	13281234	77	74	sense	NGG	AGCGGGGAACAGAGAGACGG	5	RNA1	AD49ZG	RGEN-seq
chr7:15012120-15012139	15012122	119	117	antisense	NGG	GGGAAGCATCAGAGTGACCA	5	RNA1	AD49ZG	RGEN-seq
chr7:15805647-15805666	15805649	193	192	antisense	NGG	GAGAGAGAACAGAGAGACAG	5	RNA1	AD49ZG	RGEN-seq
chr7:16705839-16705858	16705841	287	285	antisense	NGG	GAAAGGGAACAGAGGGACCT	5	RNA1	AD49ZG	RGEN-seq
chr7:17016121-17016140	17016137	78	76	sense	NGG	AGCCGGGAACAGAGAGACGG	4	RNA1	AD49ZG	RGEN-seq
chr7:19320260-19320279	19320276	31	31	sense	NGG	GGGAGATGACAGAGTGACAG	5	RNA1	AD49ZG	RGEN-seq
chr7:22740244-22740263	22740260	143	134	sense	NAG	AGACAGGAACAGAGAGACCT	5	RNA1	AD49ZG	RGEN-seq
chr7:23727487-23727506	23727489	316	315	antisense	NGG	TGGAAGGAACAGAGTGGCCG	4	RNA1	AD49ZG	RGEN-seq
chr7:26597249-26597268	26597251	12	12	antisense	NGG	GGCAGGGAACAGGGTGTCCT	5	RNA1	AD49ZG	RGEN-seq
chr7:28353912-28353931	28353914	150	147	antisense	NGG	GAGATGGAACAGAGAGACTG	5	RNA1	AD49ZG	RGEN-seq
chr7:33000045-33000064	33000061	4	3	sense	NGG	GAACTGCAACTGAGTGACCG	5	RNA1	AD49ZG	RGEN-seq
chr7:33026506-33026525	33026508	18	18	antisense	NGG	GAGCGGGAAGAGAATGACAG	4	RNA1	AD49ZG	RGEN-seq
chr7:34932448-34932467	34932464	34	33	sense	NAG	GCAGGGAAACAGAGTGACAG	5	RNA1	AD49ZG	RGEN-seq
chr7:36457763-36457782	36457779	4	4	sense	NGG	GGCGGGGAGCAGAGTGGCTG	5	RNA1	AD49ZG	RGEN-seq
chr7:38100066-38100085	38100068	120	117	antisense	NGG	GAGCATGAACAGTGTGACCT	5	RNA1	AD49ZG	RGEN-seq
chr7:39415792-39415811	39415794	7	6	antisense	NGG	GGGCAGGTACACATTGACCT	5	RNA1	AD49ZG	RGEN-seq
chr7:43919316-43919335	43919332	49	49	sense	NGG	GGGAAGGCCCAGAGTGACCA	5	RNA1	AD49ZG	RGEN-seq
chr7:44985935-44985954	44985937	251	247	antisense	NGG	GGGAGACAACATAGTGACCT	5	RNA1	AD49ZG	RGEN-seq
chr7:50565962-50565981	50565978	4	4	sense	NGG	CGGCTGGAAGTGAGTGACCC	5	RNA1	AD49ZG	RGEN-seq
chr7:58267584-58267603	58267600	53	53	sense	NGG	AGGAAGGAACAGAGGGACAG	5	RNA1	AD49ZG	RGEN-seq
chr7:63654956-63654975	63654972	16	16	sense	NGG	GGGAGGAAACATAGTGATCC	5	RNA1	AD49ZG	RGEN-seq
chr7:64952583-64952602	64952585	9	9	antisense	NGG	GGCAGAGAACAGAGTGAGCT	5	RNA1	AD49ZG	RGEN-seq
chr7:68324369-68324388	68324371	14	13	antisense	NGG	CCTCGGGAACAGAGTGAGCT	5	RNA1	AD49ZG	RGEN-seq
chr7:71367841-71367860	71367857	34	34	sense	NGG	GGGTGGGAGAAGAATGACCC	5	RNA1	AD49ZG	RGEN-seq
chr7:71977357-71977376	71977373	65	65	sense	NGG	GGTCAGGATCAGAGTGAATG	5	RNA1	AD49ZG	RGEN-seq
chr7:72737312-72737331	72737328	14	11	sense	NAG	TGGAGGGGACAGAGTGAAAG	5	RNA1	AD49ZG	RGEN-seq
chr7:81515946-81515965	81515962	16	16	sense	NGG	GGTGGGGTACAGAGTGACCA	4	RNA1	AD49ZG	RGEN-seq
chr7:86063175-86063194	86063191	151	149	sense	NGG	AGCGGGGAACAGAGAGACAG	5	RNA1	AD49ZG	RGEN-seq
chr7:87212643-87212662	87212645	150	148	antisense	NGG	CACAGGGAACTGAGTGACCG	5	RNA1	AD49ZG	RGEN-seq
chr7:88830970-88830989	88830986	482	477	sense	NGG	GGCTTGGAACACAGTGACCC	5	RNA1	AD49ZG	RGEN-seq
chr7:91510541-91510560	91510557	5	5	sense	NAG	GGGGCGGCACACAGTGACCA	5	RNA1	AD49ZG	RGEN-seq
chr7:109544041-109544060	109544043	37	36	antisense	NAG	TGGCTGAAACAGAATGACCA	5	RNA1	AD49ZG	RGEN-seq
chr7:114010700-114010719	114010702	8	8	antisense	NAG	GGAGGTGAACAGAGTGACAG	4	RNA1	AD49ZG	RGEN-seq
chr7:114650824-114650843	114650840	8	8	sense	NGG	GCGAGGAAACAGAGGGGCCG	5	RNA1	AD49ZG	RGEN-seq
chr7:123834375-123834394	123834377	66	64	antisense	NAG	GGCCGGGAGAAGAGAGACCA	5	RNA1	AD49ZG	RGEN-seq
chr7:127805238-127805257	127805254	44	43	sense	NGG	AGCGGGGAACAGAGAGACGG	5	RNA1	AD49ZG	RGEN-seq
chr7:129829882-129829901	129829884	163	163	antisense	NGG	TGGAAGGAACAGAGTGGCCG	4	RNA1	AD49ZG	RGEN-seq
chr7:130222850-130222869	130222866	135	134	sense	NGG	GGGGCGGGACAGAGGGACCG	4	RNA1	AD49ZG	RGEN-seq
chr7:133700536-133700555	133700538	244	241	antisense	NGG	GGACTGGAACAGAGTGACCA	3	RNA1	AD49ZG	RGEN-seq
chr7:134037847-134037866	134037849	83	83	antisense	NGG	GAACGGGTACAGCGTGACCC	5	RNA1	AD49ZG	RGEN-seq
chr7:134296615-134296634	134296617	4	4	antisense	NAG	GAGTTGGAGCAGAGTGACCA	5	RNA1	AD49ZG	RGEN-seq
chr7:136459420-136459439	136459436	5	5	sense	NGG	GGCTGGGAAGAGAGAGACTG	5	RNA1	AD49ZG	RGEN-seq
chr7:143421295-143421314	143421311	6	4	sense	NGG	GGGTGGGAAACCAGAGACCG	5	RNA1	AD49ZG	RGEN-seq
chr7:144804231-144804250	144804247	4	4	sense	NAG	AGGAGGGAACAGGGTGACTG	4	RNA1	AD49ZG	RGEN-seq
chr7:144866939-144866958	144866955	41	39	sense	NGG	GCCAGGGCACAGAGTGACCA	5	RNA1	AD49ZG	RGEN-seq
chr7:145263330-145263349	145263346	24	23	sense	NAG	TGTGGGGGACAGAGTGACAG	5	RNA1	AD49ZG	RGEN-seq
chr7:145476510-145476529	145476512	98	95	antisense	NGG	GGGAGAGAGGAGAGTGACCT	5	RNA1	AD49ZG	RGEN-seq
chr7:146711305-146711324	146711321	263	259	sense	NGG	GGACAGAAACAGGGTGACTG	5	RNA1	AD49ZG	RGEN-seq
chr8:2392399-2392418	2392401	68	68	antisense	NAG	AGGCTGAATCAAAGTGACCG	5	RNA1	AD49ZG	RGEN-seq
chr8:26083478-26083497	26083480	216	212	antisense	NGG	GGAAAGGAACAGAGTGATAG	5	RNA1	AD49ZG	RGEN-seq
chr8:28996196-28996215	28996198	34	34	antisense	NGG	TGGTGGGATCAGAGTGAAAG	5	RNA1	AD49ZG	RGEN-seq
chr8:31454839-31454858	31454841	78	78	antisense	NGG	GAGGTGAAACATAGTGACCG	5	RNA1	AD49ZG	RGEN-seq
chr8:35645622-35645641	35645624	6	6	antisense	NGG	TAGCTGGAACAGAGTGAGCA	5	RNA1	AD49ZG	RGEN-seq
chr8:40611991-40612010	40612007	43	39	sense	NGG	GGGGCGGGCCAGAGTGACAG	5	RNA1	AD49ZG	RGEN-seq
chr8:49731521-49731540	49731523	228	223	antisense	NGG	GTGTGGGAACACAGTGACAG	4	RNA1	AD49ZG	RGEN-seq
chr8:51225377-51225396	51225393	20	20	sense	NGG	GCGCAGGACCAGAGAGATCG	5	RNA1	AD49ZG	RGEN-seq
chr8:62395078-62395097	62395094	76	47	sense	NAG	GGGGGGGAACAGAGAGACCA	3	RNA1	AD49ZG	RGEN-seq
chr8:66416949-66416968	66416965	6	6	sense	NAG	CGGGGGAAACAGAGAGACAG	5	RNA1	AD49ZG	RGEN-seq
chr8:67371170-67371189	67371186	4	4	sense	NGG	GGGAGTGACCAGATTGACCT	5	RNA1	AD49ZG	RGEN-seq
chr8:68463642-68463661	68463644	27	26	antisense	NGG	CGGCGGGTACAGAGTGGCAG	4	RNA1	AD49ZG	RGEN-seq
chr8:68768534-68768553	68768536	243	240	antisense	NGG	GGGAGGAAAAAGAGAGACCC	5	RNA1	AD49ZG	RGEN-seq
chr8:69196434-69196453	69196436	113	112	antisense	NGG	GGGATGGAACACAATGACCA	5	RNA1	AD49ZG	RGEN-seq
chr8:69410939-69410958	69410941	238	237	antisense	NGG	GAGCGGTAGCAGAGTAACCC	5	RNA1	AD49ZG	RGEN-seq
chr8:72353644-72353663	72353646	8	7	antisense	NGG	AGGGAGGAACAGAGTGAGGG	5	RNA1	AD49ZG	RGEN-seq
chr8:83121019-83121038	83121035	84	83	sense	NAG	GGCTGAGAACACAGTGACCA	5	RNA1	AD49ZG	RGEN-seq
chr8:83613430-83613449	83613446	9	9	sense	NAG	GGCTGGGAGTAGAGAGACCG	5	RNA1	AD49ZG	RGEN-seq
chr8:88231216-88231235	88231232	8	8	sense	NGG	TGGCAGGAGCAGCGTGACCT	5	RNA1	AD49ZG	RGEN-seq
chr9:1929183-1929202	1929185	48	48	antisense	NGG	AGTGGGTAACAGAATGACCG	5	RNA1	AD49ZG	RGEN-seq
chr9:2977978-2977997	2977980	11	10	antisense	NAG	GGGATGGTACAGAGAGACAG	5	RNA1	AD49ZG	RGEN-seq
chr9:4321537-4321556	4321539	11	11	antisense	NGG	GGGCAAGAACTTACTGACCG	5	RNA1	AD49ZG	RGEN-seq
chr9:6231279-6231298	6231295	96	93	sense	NGG	AGGACAGAACAGTGTGACCG	5	RNA1	AD49ZG	RGEN-seq
chr9:17526826-17526845	17526842	349	347	sense	NGG	GGACAGAAACAGAGTGACAC	5	RNA1	AD49ZG	RGEN-seq
chr10:936536-936555	936552	8	8	sense	NGG	AGGCAGGAACAGCGTGAGCC	5	RNA1	AD49ZG	RGEN-seq
chr10:2457863-2457882	2457865	114	113	antisense	NGG	GAGAGGCAAGAGAGAGACCG	5	RNA1	AD49ZG	RGEN-seq
chr10:10499251-10499270	10499267	49	47	sense	NGG	GGGCGTGGTCAGAGTGACTG	4	RNA1	AD49ZG	RGEN-seq
chr10:12466694-12466713	12466710	169	167	sense	NGG	AGGCTGGCACAGAGGGACCA	5	RNA1	AD49ZG	RGEN-seq
chr10:13433150-13433169	13433152	429	425	antisense	NGG	GAGTGGGTACAGAGAGACCC	5	RNA1	AD49ZG	RGEN-seq
chrX:10789631-10789650	10789647	99	98	sense	NAG	GGAAGGAAAAAGAGTGACAG	5	RNA1	AD49ZG	RGEN-seq
chrX:12592586-12592605	12592588	81	80	antisense	NGG	GGTTGAGAACAGAGTGATTG	5	RNA1	AD49ZG	RGEN-seq
chrX:14661254-14661273	14661270	13	13	sense	NAG	GAAAGGGAGCAGAGTGACAG	5	RNA1	AD49ZG	RGEN-seq
chrX:15263120-15263139	15263136	4	4	sense	NAG	GGGCAGGGACAGGGTGACAA	5	RNA1	AD49ZG	RGEN-seq
chrX:25207950-25207969	25207966	6	6	sense	NGG	TGGGGAGAACAGAGGGAGCG	5	RNA1	AD49ZG	RGEN-seq
chrX:35410935-35410954	35410951	115	113	sense	NGG	CACCAGGAACAGAGTGACCG	4	RNA1	AD49ZG	RGEN-seq
chrX:43120026-43120045	43120042	116	115	sense	NGG	AGGCAGAAACAGAGTGATCA	5	RNA1	AD49ZG	RGEN-seq
chrX:93130886-93130905	93130902	4	4	sense	NGG	GGGAGAGAACAGACTGACTA	5	RNA1	AD49ZG	RGEN-seq
chrX:105241063-105241082	105241065	137	136	antisense	NGG	CTGGAGGAACAGAGTGACTG	5	RNA1	AD49ZG	RGEN-seq
chrX:109676173-109676192	109676189	9	6	sense	NAG	GTTTGGAAACAGAGTGACAG	5	RNA1	AD49ZG	RGEN-seq
chrX:124729571-124729590	124729573	24	24	antisense	NGG	GGACTGCAACAGAATGACCA	5	RNA1	AD49ZG	RGEN-seq
chrX:130728065-130728084	130728081	28	27	sense	NGG	GGCCTGGAATAAAGTGACCA	5	RNA1	AD49ZG	RGEN-seq
chrY:725664-725683	725680	26	14	sense	NAG	GGGAGGGTCCAGAGTGACCT	4	RNA1	AD49ZG	RGEN-seq
chrY:2843360-2843379	2843376	36	36	sense	NGG	AAGCGGGAACAGAGTGGCAG	4	RNA1	AD49ZG	RGEN-seq
chrY:5575691-5575710	5575693	238	237	antisense	NGG	GGGCAGGCACAGTGAGACCG	4	RNA1	AD49ZG	RGEN-seq
chrY:5852121-5852140	5852123	60	58	antisense	NGG	TGGCGGGAGAAGAGTGACCC	4	RNA1	AD49ZG	RGEN-seq
chrY:11436276-11436295	11436278	3	3	antisense	NGG	GGGGAGGAACAGAGAGGCTG	5	RNA1	AD49ZG	RGEN-seq
chrY:11877982-11878001	11877984	67	58	antisense	NAG	GGGCTATCACAGAGTGACAG	5	RNA1	AD49ZG	RGEN-seq
chrY:14831245-14831264	14831261	23	23	sense	NGG	GGTGGGGGACAGAGGGACCA	5	RNA1	AD49ZG	RGEN-seq
chrY:16909455-16909474	16909457	104	102	antisense	NGG	GGGAGAGGACAGAGTGACAA	5	RNA1	AD49ZG	RGEN-seq
chrY:17591231-17591250	17591247	8	4	sense	NGG	GGAAGGGTACAGAGGGACGG	5	RNA1	AD49ZG	RGEN-seq
chrV:5773-5792	5775	714	695	antisense	NGG	GGGCGGGAACAGAGTGACCG	0	RNA1	AD49ZG	RGEN-seq
chr0:1329110-1329129	1329126	38	37	sense	NGG	CCTTTTTAAAGACTAGAAAG	5	RNA2	AD49ZG	RGEN-seq
chr0:2500769-2500788	2500771	153	152	antisense	NGG	GAAGCTGAAAGAAGGGAAAG	5	RNA2	AD49ZG	RGEN-seq
chr0:4896129-4896148	4896131	14	14	antisense	NGG	TCTGAGGACAGACTAGACAG	5	RNA2	AD49ZG	RGEN-seq
chr0:5410148-5410167	5410150	23	23	antisense	NGG	TCTGTTTAGAAACTAGAAAG	5	RNA2	AD49ZG	RGEN-seq
chr0:5972068-5972087	5972084	196	195	sense	NGG	GGTTCTGAAAGAATGGAAAA	5	RNA2	AD49ZG	RGEN-seq
chr0:9087843-9087862	9087845	8	8	antisense	NGG	TCTGTAGCAAAACTGGGAAG	5	RNA2	AD49ZG	RGEN-seq
chr0:9504578-9504597	9504594	5	5	sense	NGG	TATGTTGAGGGACTGGAATG	5	RNA2	AD49ZG	RGEN-seq
chr0:16434236-16434255	16434238	160	155	antisense	NGG	GGTGCTGACAAACTGGAAAG	4	RNA2	AD49ZG	RGEN-seq
chr0:19875606-19875625	19875608	23	23	antisense	NGG	TTTGGAGAAAGACAGGAATG	5	RNA2	AD49ZG	RGEN-seq
chr0:20274837-20274856	20274839	127	127	antisense	NGG	CATGCAGAAAGATGGGAAAG	5	RNA2	AD49ZG	RGEN-seq
chr0:20800927-20800946	20800943	240	240	sense	NGG	TCTGGAGGAAGACTGAAAAG	4	RNA2	AD49ZG	RGEN-seq
chr0:21266029-21266048	21266045	133	133	sense	NGG	CCCTGTGAAAGACTGCAAAG	5	RNA2	AD49ZG	RGEN-seq
chr0:21416416-21416435	21416432	33	33	sense	NGG	TCAGAATAAAAACTGGAAAG	5	RNA2	AD49ZG	RGEN-seq
chr0:23411177-23411196	23411193	93	93	sense	NGG	TCTCCTAAAACACTGATAAG	5	RNA2	AD49ZG	RGEN-seq
chr0:27461875-27461894	27461877	6	6	antisense	NGG	TCTGCTAATAGACTGTCCAG	5	RNA2	AD49ZG	RGEN-seq
chr0:30683457-30683476	30683473	30	30	sense	NAG	TCTTCTGAAAGGAAGGAAAG	4	RNA2	AD49ZG	RGEN-seq
chr0:34169374-34169393	34169376	266	266	antisense	NAG	ATGGCTGGAAAACTGGAAAG	5	RNA2	AD49ZG	RGEN-seq
chr0:34296346-34296365	34296348	9	9	antisense	NGG	TGTGCTGAAAGGCAGGAAAA	4	RNA2	AD49ZG	RGEN-seq
chr0:35625742-35625761	35625758	164	161	sense	NGG	GCTGTATAAAGACTAGAAAG	5	RNA2	AD49ZG	RGEN-seq
chr0:36662043-36662062	36662045	152	152	antisense	NGG	TCACAAGAAAAACTGGAAAG	5	RNA2	AD49ZG	RGEN-seq
chr0:39698304-39698323	39698320	3	3	sense	NAG	TATTCTAGAAGACTGAAAAG	5	RNA2	AD49ZG	RGEN-seq
chr0:44516987-44517006	44516989	250	250	antisense	NGG	CCTGATGGAAGACTGAAAAA	5	RNA2	AD49ZG	RGEN-seq
chr0:48552729-48552748	48552731	167	166	antisense	NGG	CATGATGGAAGACTGGAAAC	5	RNA2	AD49ZG	RGEN-seq
chr0:62466364-62466383	62466380	16	16	sense	NAG	TCCCCTGAAAGACAAGAAAG	4	RNA2	AD49ZG	RGEN-seq
chr0:64467782-64467801	64467798	15	15	sense	NGG	TTTGCTAAGAGAATGGAAAA	5	RNA2	AD49ZG	RGEN-seq
chr0:65842258-65842277	65842260	4	4	antisense	NGG	TTTCTTTAAATACTGGAAAG	5	RNA2	AD49ZG	RGEN-seq
chr0:67439252-67439271	67439254	63	62	antisense	NGG	TCTGATAATAGACTGGGAAT	5	RNA2	AD49ZG	RGEN-seq
chr0:71234913-71234932	71234929	65	65	sense	NGG	ATTGCTGAATGAATGGAAGG	5	RNA2	AD49ZG	RGEN-seq
chr0:72716229-72716248	72716231	107	107	antisense	NGG	CATGCAGAAATACTGGGAAG	5	RNA2	AD49ZG	RGEN-seq
chr0:74289827-74289846	74289843	138	138	sense	NAG	ACTGAAGCAAGACTGAAAAG	5	RNA2	AD49ZG	RGEN-seq
chr0:75174477-75174496	75174493	15	14	sense	NAG	CCCGCTGAGAAACTGGAAAC	5	RNA2	AD49ZG	RGEN-seq
chr0:75530545-75530564	75530547	10	9	antisense	NGG	TGTGCAGAAAGACACAAAAG	5	RNA2	AD49ZG	RGEN-seq
chr0:77272271-77272290	77272287	270	268	sense	NGG	TCTACTGTCAGACTGGAAAC	4	RNA2	AD49ZG	RGEN-seq
chr0:79153326-79153345	79153342	462	456	sense	NAG	CACACTGAAAAACTGGAAAG	5	RNA2	AD49ZG	RGEN-seq
chr0:80680700-80680719	80680716	257	254	sense	NAG	TATACTAAAAGAATGGAAAG	4	RNA2	AD49ZG	RGEN-seq
chr0:82211148-82211167	82211150	165	165	antisense	NGG	AATCCTGAAATACTGGATAG	5	RNA2	AD49ZG	RGEN-seq
chr0:85178491-85178510	85178493	26	26	antisense	NGG	TCTAATGAGAGACAGAAAAG	5	RNA2	AD49ZG	RGEN-seq
chr0:87500370-87500389	87500372	58	46	antisense	NAG	TGTGCTGCAAGACTGGGAAT	4	RNA2	AD49ZG	RGEN-seq
chr0:88959430-88959449	88959432	331	327	antisense	NGG	CCAACTGGAAGACTGGAAAG	4	RNA2	AD49ZG	RGEN-seq
chr0:90334742-90334761	90334758	194	188	sense	NGG	TATGCAGGAAGACTAGATAG	5	RNA2	AD49ZG	RGEN-seq
chr0:91163509-91163528	91163525	358	356	sense	NGG	AATGCTGAAATACTGCAAAG	4	RNA2	AD49ZG	RGEN-seq
chr0:91175467-91175486	91175483	237	236	sense	NGG	TCTAATGAAAGACCGAAAAG	4	RNA2	AD49ZG	RGEN-seq
chr0:95611300-95611319	95611302	108	106	antisense	NAG	TCTCCTGAGAGACAGGAAAG	3	RNA2	AD49ZG	RGEN-seq
chr0:95743307-95743326	95743323	5	5	sense	NAG	TATGTAGGAAAACTGGAAAG	5	RNA2	AD49ZG	RGEN-seq
chr0:97364452-97364471	97364468	13	12	sense	NAG	GTTGCTAAAAGAATGGATAG	5	RNA2	AD49ZG	RGEN-seq
chr0:99106181-99106200	99106197	4	4	sense	NGG	TGTGCTGAGGGACTGGTGAG	5	RNA2	AD49ZG	RGEN-seq
chr0:101940332-101940351	101940348	5	5	sense	NGG	TCTAGTGAGAGACAGAAAAG	5	RNA2	AD49ZG	RGEN-seq
chr0:105517745-105517764	105517761	17	17	sense	NGG	TGAACTCAAAGCCTGGAAAG	5	RNA2	AD49ZG	RGEN-seq
chr0:107660744-107660763	107660746	4	3	antisense	NAG	TCAGAAGAAACACTGGAAAT	5	RNA2	AD49ZG	RGEN-seq
chr0:110615510-110615529	110615526	38	38	sense	NAG	TCTAATGAAAGACAGAAAAG	4	RNA2	AD49ZG	RGEN-seq
chr0:116111645-116111664	116111661	28	27	sense	NGG	TCTGATAGAAGAAAGGAAAG	5	RNA2	AD49ZG	RGEN-seq
chr0:116567487-116567506	116567489	8	8	antisense	NAG	TCTTATGAAAGACTGAAGAG	4	RNA2	AD49ZG	RGEN-seq
chr0:120599515-120599534	120599531	50	50	sense	NGG	TCTGCTGGAAGACTGTATAA	4	RNA2	AD49ZG	RGEN-seq
chr0:122416093-122416112	122416095	27	26	antisense	NGG	CCTACTTACAGACTGGAAAC	5	RNA2	AD49ZG	RGEN-seq
chr0:122756589-122756608	122756591	335	330	antisense	NGG	TTTGAAAAAAGACTGGAAGG	5	RNA2	AD49ZG	RGEN-seq
chr0:134635523-134635542	134635539	163	161	sense	NGG	TCTACTGACAGACTGAAATG	4	RNA2	AD49ZG	RGEN-seq
chr0:134681106-134681125	134681122	6	6	sense	NGG	ACAGCTCACAGACAGGAAAG	5	RNA2	AD49ZG	RGEN-seq
chr0:139091203-139091222	139091219	9	9	sense	NGG	TGTGTTGAGAAACTGGACAG	5	RNA2	AD49ZG	RGEN-seq
chr0:141054667-141054686	141054683	222	219	sense	NGG	GCTGCTGTCAGACTGGAGAG	4	RNA2	AD49ZG	RGEN-seq
chr0:141513263-141513282	141513265	8	8	antisense	NGG	TGAGCTGGAAGACTGGAGAC	5	RNA2	AD49ZG	RGEN-seq
chr0:141902162-141902181	141902164	10	10	antisense	NGG	GCAGCAGGAAGAGTGGAAAG	5	RNA2	AD49ZG	RGEN-seq
chr0:142477058-142477077	142477074	6	6	sense	NGG	TCAGCAGAAAGAAAGGAAAA	5	RNA2	AD49ZG	RGEN-seq
chr0:143499830-143499849	143499846	15	15	sense	NAG	TCTTCATAAAGACTGAAAAG	4	RNA2	AD49ZG	RGEN-seq
chr0:143782944-143782963	143782946	19	19	antisense	NGG	GCTGAGGAAAGACTGGCCAG	5	RNA2	AD49ZG	RGEN-seq
chr0:144567241-144567260	144567257	3	3	sense	NGG	TCTGCAAACAGACAGGAAAT	5	RNA2	AD49ZG	RGEN-seq
chr0:149291113-149291132	149291129	4	3	sense	NGG	GCAGCTCAAAGAGTAGAAAG	5	RNA2	AD49ZG	RGEN-seq
chr0:150110165-150110184	150110181	10	10	sense	NGG	TCAGAAGAAAGAATGGGAAG	5	RNA2	AD49ZG	RGEN-seq
chr0:152586540-152586559	152586542	208	206	antisense	NGG	TCTGCTGATACACTGAAGAG	4	RNA2	AD49ZG	RGEN-seq
chr0:154726336-154726355	154726352	3	3	sense	NGG	TATGCTGAAAGAAAAGAAAC	5	RNA2	AD49ZG	RGEN-seq
chr0:155062485-155062504	155062501	4	4	sense	NGG	GTTTCTGCTAGACTGGAAAG	5	RNA2	AD49ZG	RGEN-seq
chr0:155486259-155486278	155486275	186	186	sense	NGG	TATACTGAGAGACAGAAAAG	5	RNA2	AD49ZG	RGEN-seq
chr0:156265616-156265635	156265632	8	8	sense	NAG	TCTTATGAGAGACTAAAAAG	5	RNA2	AD49ZG	RGEN-seq
chr0:156508234-156508253	156508236	14	14	antisense	NGG	ACTATGGAGAGACTGGAAAG	5	RNA2	AD49ZG	RGEN-seq
chr0:163554587-163554606	163554603	209	207	sense	NGG	ACTGATGATAGACTAGAAAT	5	RNA2	AD49ZG	RGEN-seq
chr0:166390855-166390874	166390871	9	8	sense	NAG	CCACCAGAAACACTGGAAAG	5	RNA2	AD49ZG	RGEN-seq
chr0:166435839-166435858	166435855	21	21	sense	NGG	TCCACTGAAAGAGGGGAAAG	4	RNA2	AD49ZG	RGEN-seq
chr0:168925376-168925395	168925378	4	4	antisense	NAG	TCAGCTGTAAAACTGTAAAG	4	RNA2	AD49ZG	RGEN-seq
chr0:169401970-169401989	169401972	48	48	antisense	NAG	TCTTCTGGAAAACTGGAAAC	4	RNA2	AD49ZG	RGEN-seq
chr0:173080658-173080677	173080660	102	102	antisense	NGG	TTTGCAGAAAGACTGGCATG	4	RNA2	AD49ZG	RGEN-seq
chr0:173964027-173964046	173964043	10	10	sense	NGG	GCTGCTGAGAGACTGCCAAG	4	RNA2	AD49ZG	RGEN-seq
chr0:174565325-174565344	174565327	7	7	antisense	NGG	TCTTCTAAAAGACTGGAATT	4	RNA2	AD49ZG	RGEN-seq
chr0:178776169-178776188	178776171	68	68	antisense	NGG	TGTCAAGAAAGAATGGAAAG	5	RNA2	AD49ZG	RGEN-seq
chr0:179118759-179118778	179118761	249	246	antisense	NGG	CATGCAAAAAGACAGGAAAG	5	RNA2	AD49ZG	RGEN-seq
chr0:181336369-181336388	181336385	110	106	sense	NGG	TCTGATTAATGACTGGGAAG	4	RNA2	AD49ZG	RGEN-seq
chr0:181603489-181603508	181603491	266	266	antisense	NGG	CCTGCCTGAAGGCTGGAAAG	5	RNA2	AD49ZG	RGEN-seq
chr0:182101117-182101136	182101133	28	28	sense	NGG	TATGAGGAGAGACTGGAAAG	4	RNA2	AD49ZG	RGEN-seq
chr0:182896852-182896871	182896868	11	11	sense	NGG	TGTGCAGAAGCACTGGAATG	5	RNA2	AD49ZG	RGEN-seq
chr0:184489162-184489181	184489178	21	21	sense	NGG	TTAGTTCAAAGACTGGAGAG	5	RNA2	AD49ZG	RGEN-seq
chr0:184954337-184954356	184954339	3	3	antisense	NGG	TCGGCTGAATAAAAGGAAAG	5	RNA2	AD49ZG	RGEN-seq
chr0:185382679-185382698	185382695	88	87	sense	NGG	TTTGCTGGAAAATTGAAAAG	5	RNA2	AD49ZG	RGEN-seq
chr0:189335222-189335241	189335238	57	56	sense	NGG	TTCTCTGAAAGACAGGACAG	5	RNA2	AD49ZG	RGEN-seq
chr0:191166442-191166461	191166458	11	11	sense	NGG	TTGACTAAATGACTGGAAAG	5	RNA2	AD49ZG	RGEN-seq
chr0:197733084-197733103	197733100	351	349	sense	NGG	TTTACTGATACACTGGAAAG	4	RNA2	AD49ZG	RGEN-seq
chr0:199867555-199867574	199867557	16	16	antisense	NGG	GCTCCTCAAAGATTGGAATG	5	RNA2	AD49ZG	RGEN-seq
chr0:201763957-201763976	201763959	13	13	antisense	NAG	AATGCTGAGAGACTAGAGAG	5	RNA2	AD49ZG	RGEN-seq
chr0:202282795-202282814	202282811	238	238	sense	NGG	TCTACTGATAAACTGAAAAG	4	RNA2	AD49ZG	RGEN-seq
chr0:202703011-202703030	202703013	66	66	antisense	NGG	TCTGAGAAAAGACTCAAAAG	5	RNA2	AD49ZG	RGEN-seq
chr0:203373927-203373946	203373943	15	15	sense	NGG	TCTGCTTAAATACTGTATAG	4	RNA2	AD49ZG	RGEN-seq
chr0:210655826-210655845	210655828	42	41	antisense	NAG	TGTGCTGAGAGACTGGACAA	4	RNA2	AD49ZG	RGEN-seq
chr0:211413277-211413296	211413279	248	124	antisense	NAG	TCACTGGAAAGACTGGAAAA	5	RNA2	AD49ZG	RGEN-seq
chr0:212359244-212359263	212359260	3	3	sense	NAG	ACTTGTGGAATACTGGAAAG	5	RNA2	AD49ZG	RGEN-seq
chr0:212894406-212894425	212894408	74	74	antisense	NAG	GCTGCAGGAAAACTGAAAAG	5	RNA2	AD49ZG	RGEN-seq
chr0:214173681-214173700	214173683	274	274	antisense	NAG	TATGCAAAAAGACTGGAAAG	3	RNA2	AD49ZG	RGEN-seq
chr0:216512670-216512689	216512672	12	12	antisense	NAG	AGTGATGAAACATTGGAAAG	5	RNA2	AD49ZG	RGEN-seq
chr0:220422157-220422176	220422173	4	3	sense	NGG	TCTGCTTGAAGATTAGAGAG	5	RNA2	AD49ZG	RGEN-seq
chr0:221723317-221723336	221723333	18	18	sense	NAG	ACTTCTGAAACATTGGAAAT	5	RNA2	AD49ZG	RGEN-seq
chr0:222353058-222353077	222353074	17	17	sense	NAG	TTTGCTTAAATACTGGAAAA	4	RNA2	AD49ZG	RGEN-seq
chr0:226027193-226027212	226027209	234	233	sense	NGG	GCTGGTGAAAGACAAGAAAG	4	RNA2	AD49ZG	RGEN-seq
chr0:226600044-226600063	226600060	313	311	sense	NGG	AATGCTGAAAAACTAGACAG	5	RNA2	AD49ZG	RGEN-seq
chr0:229620667-229620686	229620683	6	6	sense	NGG	TCTCCTGCAAGACTGAGGAG	5	RNA2	AD49ZG	RGEN-seq
chr0:230071403-230071422	230071419	44	44	sense	NGG	TCTGCCTAAAGAATGGAAAC	4	RNA2	AD49ZG	RGEN-seq
chr0:231757068-231757087	231757070	368	360	antisense	NGG	GATGCAGAAAGACTAGACAG	5	RNA2	AD49ZG	RGEN-seq
chr0:232631500-232631519	232631502	12	12	antisense	NAG	ATTGCTGAGAGATTAGAAAG	5	RNA2	AD49ZG	RGEN-seq
chr0:232703590-232703609	232703606	278	274	sense	NGG	TGCCTTGAAAGAATGGAAAG	5	RNA2	AD49ZG	RGEN-seq
chr0:237336501-237336520	237336517	268	265	sense	NAG	TCTTGCTAAAGACTGGAAAG	4	RNA2	AD49ZG	RGEN-seq
chr0:238314287-238314306	238314303	171	170	sense	NGG	TTTGTTGTAAGACTGGAATG	4	RNA2	AD49ZG	RGEN-seq
chr0:239947039-239947058	239947041	183	180	antisense	NAG	TCTACTGTAAGAATGGAAAG	3	RNA2	AD49ZG	RGEN-seq
chr0:243657574-243657593	243657590	26	25	sense	NAG	ATGGCTGAAGGACTAGAAAG	5	RNA2	AD49ZG	RGEN-seq
chr0:246028579-246028598	246028581	8	8	antisense	NGG	TGTGCAGACAGACTGAACAG	5	RNA2	AD49ZG	RGEN-seq
chr0:248003270-248003289	248003272	8	8	antisense	NAG	CCTGCTACAAGGCTGAAAAG	5	RNA2	AD49ZG	RGEN-seq
chr0:250202302-250202321	250202318	5	5	sense	NGG	TATGTTGAAAGAAAGGAAAT	5	RNA2	AD49ZG	RGEN-seq
chr0:263321679-263321698	263321695	207	207	sense	NAG	ACACATGAAAGACTGAAAAG	5	RNA2	AD49ZG	RGEN-seq
chr0:265100627-265100646	265100643	9	8	sense	NGG	TGTGCTTGAAGACTGGAGAA	5	RNA2	AD49ZG	RGEN-seq
chr0:267044849-267044868	267044851	4	4	antisense	NGG	TCTGATGAACTACTGGCAAG	4	RNA2	AD49ZG	RGEN-seq
chr0:269882506-269882525	269882522	9	9	sense	NGG	TCTCCTGAGTGACTGGTAAG	4	RNA2	AD49ZG	RGEN-seq
chr0:273138631-273138650	273138633	350	348	antisense	NGG	TCTGCTGTAAAACTGGAAAG	2	RNA2	AD49ZG	RGEN-seq
chr0:275385511-275385530	275385513	25	25	antisense	NGG	TTTGCAGTAAGACAGGAAGG	5	RNA2	AD49ZG	RGEN-seq
chr0:278285863-278285882	278285879	9	8	sense	NAG	TCTGCTAAGAAACTAGAAAG	4	RNA2	AD49ZG	RGEN-seq
chr0:279923377-279923396	279923379	261	259	antisense	NAG	GGTGAAGAAAGACTAGAAAG	5	RNA2	AD49ZG	RGEN-seq
chr0:280041181-280041200	280041197	216	215	sense	NGG	ATTGGTGAAAAACTGGAAAA	5	RNA2	AD49ZG	RGEN-seq
chr0:280688983-280689002	280688999	248	245	sense	NGG	TCCACTGGAACACTGGAAAT	5	RNA2	AD49ZG	RGEN-seq
chr1:7847884-7847903	7847900	45	45	sense	NGG	TCTGAAGAAAAGCTGGGAAG	5	RNA2	AD49ZG	RGEN-seq
chr1:19972777-19972796	19972793	33	33	sense	NAG	CCAGAAGAAAGAATGGAAAG	5	RNA2	AD49ZG	RGEN-seq
chr1:22215198-22215217	22215200	13	13	antisense	NGG	ACTGCTCAGAGGCTGAAAAG	5	RNA2	AD49ZG	RGEN-seq
chr1:24772669-24772688	24772685	15	15	sense	NGG	ACTGCTCAGAGACTGGCCAG	5	RNA2	AD49ZG	RGEN-seq
chr1:25300325-25300344	25300327	74	74	antisense	NGG	AATGCTGATAGGCTGGAAAC	5	RNA2	AD49ZG	RGEN-seq
chr1:30605946-30605965	30605962	19	19	sense	NGG	TCAGATGATAGACTGGCATG	5	RNA2	AD49ZG	RGEN-seq
chr1:30666425-30666444	30666441	5	5	sense	NAG	ACTAGTGAGAGACTGGAAGG	5	RNA2	AD49ZG	RGEN-seq
chr1:34296167-34296186	34296183	81	81	sense	NGG	TCTTGTGGAAGACTGAAAAG	4	RNA2	AD49ZG	RGEN-seq
chr1:35016150-35016169	35016166	19	19	sense	NGG	TCTGCATAAATACTGAAAAT	5	RNA2	AD49ZG	RGEN-seq
chr1:49070494-49070513	49070510	63	62	sense	NAG	GTTGCTGAGAGACTGGAAGA	5	RNA2	AD49ZG	RGEN-seq
chr1:50147865-50147884	50147881	3	3	sense	NGG	TCTACTGAAAAATTGAGAAG	5	RNA2	AD49ZG	RGEN-seq
chr1:51296961-51296980	51296977	6	6	sense	NGG	TATGCTGTCAGACAGGAGAG	5	RNA2	AD49ZG	RGEN-seq
chr1:51959405-51959424	51959421	27	27	sense	NGG	AGTGCTGAGACACTGGAAGG	5	RNA2	AD49ZG	RGEN-seq
chr1:55099051-55099070	55099053	232	232	antisense	NGG	TCTGTTGAGAAACTGGAAAA	4	RNA2	AD49ZG	RGEN-seq
chr1:55150127-55150146	55150143	248	236	sense	NGG	TTAGCTGAAAGACTGGAAAA	3	RNA2	AD49ZG	RGEN-seq
chr1:56607573-56607592	56607589	31	31	sense	NGG	TCTGCTATAAGTCTGGACAG	4	RNA2	AD49ZG	RGEN-seq
chr1:58012490-58012509	58012492	200	197	antisense	NGG	CCTGCTATCAGACTGGAAAT	5	RNA2	AD49ZG	RGEN-seq
chr1:59258355-59258374	59258371	5	5	sense	NAG	TGTGAAGAGAAACTGGAAAG	5	RNA2	AD49ZG	RGEN-seq
chr1:68225929-68225948	68225945	33	33	sense	NGG	TCTAGGGAAAGACAGAAAAG	5	RNA2	AD49ZG	RGEN-seq
chr1:71901546-71901565	71901548	132	132	antisense	NAG	CCTGTTGAAAGAATGAAAAG	4	RNA2	AD49ZG	RGEN-seq
chr1:73456326-73456345	73456328	217	214	antisense	NGG	ATTGCTTGAAGACTGAAAAG	5	RNA2	AD49ZG	RGEN-seq
chr1:75338942-75338961	75338944	42	41	antisense	NGG	CCTCATGGAAGACTGGAATG	5	RNA2	AD49ZG	RGEN-seq
chr1:76170088-76170107	76170090	20	20	antisense	NAG	TGTGCTGGAAAACTGGGAAG	4	RNA2	AD49ZG	RGEN-seq
chr1:76202941-76202960	76202943	74	74	antisense	NGG	TCTACCTGAAGACAGGAAAG	5	RNA2	AD49ZG	RGEN-seq
chr1:76371986-76372005	76372002	3	3	sense	NAG	TCCTATTAAAGACTGGATAG	5	RNA2	AD49ZG	RGEN-seq
chr1:78289440-78289459	78289456	6	6	sense	NAG	TGTAGAGATAGACTGGAAAG	5	RNA2	AD49ZG	RGEN-seq
chr1:80613390-80613409	80613392	319	318	antisense	NGG	GATGCAGGAAAACTGGAAAG	5	RNA2	AD49ZG	RGEN-seq
chr1:89749366-89749385	89749382	15	15	sense	NGG	TGTGTTGAAAGACTGGTTAT	5	RNA2	AD49ZG	RGEN-seq
chr1:91444631-91444650	91444647	132	132	sense	NGG	TCTACTAATGGACTGGAAAA	5	RNA2	AD49ZG	RGEN-seq
chr1:91519306-91519325	91519308	22	22	antisense	NGG	AGTGCTGCAAGACCGGAAAT	5	RNA2	AD49ZG	RGEN-seq
chr1:92852878-92852897	92852880	116	116	antisense	NGG	TCCATTAAAAGACTGGCAAG	5	RNA2	AD49ZG	RGEN-seq
chr1:93561971-93561990	93561987	32	32	sense	NAG	GCTGCTAGATGACTGAAAAG	5	RNA2	AD49ZG	RGEN-seq
chr1:96267002-96267021	96267004	34	33	antisense	NGG	AGTGATGAAAGACTGGCAGG	5	RNA2	AD49ZG	RGEN-seq
chr1:98660062-98660081	98660064	132	131	antisense	NGG	CCCACTGCAAGACTGGAAAG	4	RNA2	AD49ZG	RGEN-seq
chr1:100851213-100851232	100851229	5	5	sense	NAG	ACTGCTAAAAGACTGAAAAA	4	RNA2	AD49ZG	RGEN-seq
chr1:102950741-102950760	102950757	23	22	sense	NAG	TATGCCAAAAAACTGGACAG	5	RNA2	AD49ZG	RGEN-seq
chr1:103932414-103932433	103932416	71	70	antisense	NGG	TGGGCAGAAAGACTGGACAA	5	RNA2	AD49ZG	RGEN-seq
chr1:105955825-105955844	105955841	10	10	sense	NGG	GCTGCTGAGAGATTGAAAAA	5	RNA2	AD49ZG	RGEN-seq
chr1:109929735-109929754	109929737	131	131	antisense	NGG	GCAGCTGAACAACTGGGAAG	5	RNA2	AD49ZG	RGEN-seq
chr1:113126645-113126664	113126661	17	15	sense	NAG	TGTTCTGAAACACTGGAATG	4	RNA2	AD49ZG	RGEN-seq
chr1:113858953-113858972	113858969	3	3	sense	NAG	TATGACCAAATACTGGAAAG	5	RNA2	AD49ZG	RGEN-seq
chr1:115522869-115522888	115522871	9	9	antisense	NGG	TATAATAAGAGACTGGAAAG	5	RNA2	AD49ZG	RGEN-seq
chr1:115940496-115940515	115940512	10	10	sense	NAG	CCTGCAAAAAGACTGGACAG	4	RNA2	AD49ZG	RGEN-seq
chr1:116312947-116312966	116312963	62	62	sense	NGG	CCTGCAGCCAGACTGGAAAG	4	RNA2	AD49ZG	RGEN-seq
chr1:117844074-117844093	117844090	6	6	sense	NGG	TCAGTAGAAGGACTGGAAGG	5	RNA2	AD49ZG	RGEN-seq
chr1:117976124-117976143	117976140	183	176	sense	NAG	GCAGCTGGAAGACTGGATAG	4	RNA2	AD49ZG	RGEN-seq
chr1:120154419-120154438	120154421	355	352	antisense	NGG	TATGGAGAAAGACTAGAAAA	5	RNA2	AD49ZG	RGEN-seq
chr1:122634078-122634097	122634080	40	40	antisense	NGG	CCAGCTGATAGACTGGGGAG	5	RNA2	AD49ZG	RGEN-seq
chr1:122931223-122931242	122931225	9	4	antisense	NGG	ACTTGTAAAAGACTGCAAAG	5	RNA2	AD49ZG	RGEN-seq
chr1:123363168-123363187	123363170	9	9	antisense	NAG	GTTCCTTAAAGACTGGATAG	5	RNA2	AD49ZG	RGEN-seq
chr1:123562752-123562771	123562768	305	297	sense	NGG	TCTGCTGAAAGAAGGGAAAG	2	RNA2	AD49ZG	RGEN-seq
chr1:125280158-125280177	125280160	6	6	antisense	NAG	GATACTGAAAGATGGGAAAG	5	RNA2	AD49ZG	RGEN-seq
chr1:125300544-125300563	125300560	340	330	sense	NGG	TTAGCTGAAAAAGTGGAAAG	4	RNA2	AD49ZG	RGEN-seq
chr1:126549530-126549549	126549546	20	20	sense	NGG	TCTAATGAGAGACAGAAAAG	5	RNA2	AD49ZG	RGEN-seq
chr1:128862666-128862685	128862682	31	31	sense	NGG	TCTGCTATAAAACTGGAATC	5	RNA2	AD49ZG	RGEN-seq
chr1:128877585-128877604	128877587	10	10	antisense	NGG	TCAAAGGAAACACTGGAAAG	5	RNA2	AD49ZG	RGEN-seq
chr1:129958861-129958880	129958877	140	136	sense	NGG	AGAGATGAAGGACTGGAAAG	5	RNA2	AD49ZG	RGEN-seq
chr1:130034176-130034195	130034192	24	24	sense	NAG	TCTGCAGAAAGCCAGGAAAG	3	RNA2	AD49ZG	RGEN-seq
chr1:130940434-130940453	130940450	26	26	sense	NAG	TCAGCAGAGAAACTGAAAAG	5	RNA2	AD49ZG	RGEN-seq
chr1:132337682-132337701	132337698	34	34	sense	NGG	TCTGCCCAACCACTGGAAAG	4	RNA2	AD49ZG	RGEN-seq
chr1:133960568-133960587	133960570	350	350	antisense	NGG	TCTAATGAAAGACTGAAATG	4	RNA2	AD49ZG	RGEN-seq
chr1:134420537-134420556	134420553	37	37	sense	NGG	CTTGCTGAAACACAGGAAAT	5	RNA2	AD49ZG	RGEN-seq
chr1:134670689-134670708	134670705	337	336	sense	NGG	TTGGCAGAAAGACTGAAAAA	5	RNA2	AD49ZG	RGEN-seq
chr1:137187553-137187572	137187569	4	3	sense	NGG	TGTGATGAAAGGCAAGAAAG	5	RNA2	AD49ZG	RGEN-seq
chr1:143934598-143934617	143934600	169	169	antisense	NAG	TCTACTAAAATACTGGTAAG	4	RNA2	AD49ZG	RGEN-seq
chr1:144662042-144662061	144662044	138	137	antisense	NGG	GAGGGTGAAAGCCTGGAAAG	5	RNA2	AD49ZG	RGEN-seq
chr1:147013083-147013102	147013099	256	250	sense	NAG	CTCACTGAAAGAATGGAAAG	5	RNA2	AD49ZG	RGEN-seq
chr1:149116594-149116613	149116610	42	42	sense	NAG	GCTGCTGTAAGACTGGAAAA	3	RNA2	AD49ZG	RGEN-seq
chr1:151172164-151172183	151172180	221	218	sense	NAG	GGGGCTGAAAGACTGGAAGA	5	RNA2	AD49ZG	RGEN-seq
chr1:153174811-153174830	153174813	5	4	antisense	NGG	TCCTCAGAATGACTGGAAAC	5	RNA2	AD49ZG	RGEN-seq
chr1:153233202-153233221	153233218	171	143	sense	NGG	ACAGCTTAAAGAAAGGAAAG	5	RNA2	AD49ZG	RGEN-seq
chr1:154852507-154852526	154852523	30	30	sense	NAG	TTTGCAGAAAGGCTAGAAAG	4	RNA2	AD49ZG	RGEN-seq
chr1:155708845-155708864	155708847	3	3	antisense	NGG	GCTGTTGATAAAATGGAAAG	5	RNA2	AD49ZG	RGEN-seq
chr1:156776542-156776561	156776558	212	210	sense	NAG	ATGGCTGGAAGACTGGAATG	5	RNA2	AD49ZG	RGEN-seq
chr1:157144072-157144091	157144074	70	70	antisense	NAG	TTAGCTGAAGGACTAGAAAG	4	RNA2	AD49ZG	RGEN-seq
chr1:157862335-157862354	157862337	225	221	antisense	NGG	CTTGCTATAAGACAGGAAAG	5	RNA2	AD49ZG	RGEN-seq
chr1:159879587-159879606	159879589	139	139	antisense	NGG	TCTATGCAAAGACTGGAAAG	4	RNA2	AD49ZG	RGEN-seq
chr1:161875489-161875508	161875505	267	267	sense	NGG	TATGATGAAATACTGGAAAA	4	RNA2	AD49ZG	RGEN-seq
chr1:163475613-163475632	163475615	8	7	antisense	NAG	TCCACAGAAAGATTGGATAG	5	RNA2	AD49ZG	RGEN-seq
chr1:165915432-165915451	165915434	16	16	antisense	NGG	TCTTCTGAAAGACTAGTAAA	4	RNA2	AD49ZG	RGEN-seq
chr1:166590801-166590820	166590817	22	22	sense	NAG	GTTACTGAAACATTGGAAAG	5	RNA2	AD49ZG	RGEN-seq
chr1:167353177-167353196	167353179	4	4	antisense	NAG	TCAGCGGAAAGACTGAAAAT	4	RNA2	AD49ZG	RGEN-seq
chr1:170589207-170589226	170589223	62	57	sense	NAG	GATACTGAAACACTGGGAAG	5	RNA2	AD49ZG	RGEN-seq
chr1:171091568-171091587	171091584	3	3	sense	NAG	AGTTCTAAAAGACTGGAAAC	5	RNA2	AD49ZG	RGEN-seq
chr1:175255876-175255895	175255892	61	61	sense	NGG	TCTCCTATAAAACTGAAAAG	5	RNA2	AD49ZG	RGEN-seq
chr1:181537541-181537560	181537557	30	30	sense	NGG	TCTGCTATAAGGCTGGAATA	5	RNA2	AD49ZG	RGEN-seq
chr1:184534237-184534256	184534239	37	37	antisense	NAG	AGTGCTGTAAGACTAGGAAG	5	RNA2	AD49ZG	RGEN-seq
chr1:192067546-192067565	192067562	48	47	sense	NGG	TCTGCTAGAAAACTGGAGAA	5	RNA2	AD49ZG	RGEN-seq
chr1:194557105-194557124	194557107	20	20	antisense	NAG	GCTGCTGGTAGCCTGGAAAG	4	RNA2	AD49ZG	RGEN-seq
chr1:197030655-197030674	197030657	4	4	antisense	NAG	ACTTCTGAGAAACTGGAAAT	5	RNA2	AD49ZG	RGEN-seq
chr1:197417937-197417956	197417939	5	5	antisense	NGG	GCTATTGAGAGACTTGAAAG	5	RNA2	AD49ZG	RGEN-seq
chr1:198422747-198422766	198422749	4	4	antisense	NAG	TTTACTAAAAGATTGTAAAG	5	RNA2	AD49ZG	RGEN-seq
chr1:198843391-198843410	198843393	9	9	antisense	NGG	TCAGCTGTAAGAGTGGAAAA	4	RNA2	AD49ZG	RGEN-seq
chr1:201184459-201184478	201184475	13	12	sense	NAG	ACTATTGAAAGACTGGAGAA	5	RNA2	AD49ZG	RGEN-seq
chr1:204370254-204370273	204370270	419	419	sense	NGG	AAAGCAGAAAGACTGGAAAA	5	RNA2	AD49ZG	RGEN-seq
chr1:206364382-206364401	206364398	11	11	sense	NGG	TCTGCTTGTAGACTGGGGAG	5	RNA2	AD49ZG	RGEN-seq
chr1:209779530-209779549	209779546	3	3	sense	NGG	TCTCCTGAAATATTGGAAGA	5	RNA2	AD49ZG	RGEN-seq
chr1:214467013-214467032	214467015	116	116	antisense	NGG	TCCTGTGAATGACTGGAAAA	5	RNA2	AD49ZG	RGEN-seq
chr1:217415358-217415377	217415374	47	45	sense	NGG	GTTGCTGAAAGACTGGGAGA	5	RNA2	AD49ZG	RGEN-seq
chr1:221961123-221961142	221961125	135	134	antisense	NGG	TCCACAGGAACACTGGAAAG	5	RNA2	AD49ZG	RGEN-seq
chr1:222421644-222421663	222421646	71	71	antisense	NGG	ACTATTAAAAGACAGGAAAG	5	RNA2	AD49ZG	RGEN-seq
chr1:223175481-223175500	223175497	58	57	sense	NGG	ACTTCTGAAAAACTACAAAG	5	RNA2	AD49ZG	RGEN-seq
chr1:225822853-225822872	225822869	285	283	sense	NAG	ACAACTGAAAAACTGGAAAG	4	RNA2	AD49ZG	RGEN-seq
chr1:229082599-229082618	229082615	301	301	sense	NGG	TCTGCTGAGAGACAGAAAAG	3	RNA2	AD49ZG	RGEN-seq
chr1:232330017-232330036	232330033	5	5	sense	NGG	CCTGGTAAAGGAATGGAAAG	5	RNA2	AD49ZG	RGEN-seq
chr1:236468153-236468172	236468155	45	45	antisense	NGG	GATGATGACAGAATGGAAAG	5	RNA2	AD49ZG	RGEN-seq
chr1:236757710-236757729	236757712	117	117	antisense	NAG	CCAGCCTAAAGACTGGGAAG	5	RNA2	AD49ZG	RGEN-seq
chr1:244385931-244385950	244385933	4	4	antisense	NGG	TCTGGAAAGAGACAGGAAAG	5	RNA2	AD49ZG	RGEN-seq
chr1:244968970-244968989	244968972	215	179	antisense	NGG	TCAGCTGAGAGACTGGATAT	4	RNA2	AD49ZG	RGEN-seq
chr1:247716915-247716934	247716931	3	3	sense	NGG	TCTGGTGAAGTGCTGGAAAA	5	RNA2	AD49ZG	RGEN-seq
chr1:248073680-248073699	248073682	367	366	antisense	NAG	GAGGCTGAAAGACTGGAAAG	3	RNA2	AD49ZG	RGEN-seq
chr1:250068828-250068847	250068830	280	278	antisense	NGG	ATTTCTGAAAAACTGGAAAT	5	RNA2	AD49ZG	RGEN-seq
chr1:251282445-251282464	251282447	200	200	antisense	NGG	TCTAATGAGAGACAGGAAAG	4	RNA2	AD49ZG	RGEN-seq
chr1:254059427-254059446	254059429	260	260	antisense	NGG	GATGCTAAAAGTCTAGAAAG	5	RNA2	AD49ZG	RGEN-seq
chr1:254426015-254426034	254426031	15	15	sense	NAG	TCTGCTCAGAGACAGGAAAA	4	RNA2	AD49ZG	RGEN-seq
chr1:256478555-256478574	256478571	41	40	sense	NGG	TCAGATGTAAGAATGGAAAG	4	RNA2	AD49ZG	RGEN-seq
chr1:258719408-258719427	258719410	116	116	antisense	NGG	TCTGTGGAGAAACTGGGAAG	5	RNA2	AD49ZG	RGEN-seq
chr1:259044387-259044406	259044389	3	3	antisense	NGG	TCCTCTGTAGTACTGGAAAG	5	RNA2	AD49ZG	RGEN-seq
chr1:260399141-260399160	260399157	6	6	sense	NAG	CCTACTGGGAGACTGGAAAC	5	RNA2	AD49ZG	RGEN-seq
chr1:263505228-263505247	263505244	26	26	sense	NGG	CATGCTGAAGGAGAGGAAAG	5	RNA2	AD49ZG	RGEN-seq
chr1:272657415-272657434	272657417	215	213	antisense	NGG	GCTGCAGAAGAACTGGAAAA	5	RNA2	AD49ZG	RGEN-seq
chr1:273424120-273424139	273424122	4	4	antisense	NAG	AGTGCTGAACAATTGGAAAG	5	RNA2	AD49ZG	RGEN-seq
chr1:276551594-276551613	276551610	12	11	sense	NAG	ACAGCTGAACAACTGGATAG	5	RNA2	AD49ZG	RGEN-seq
chr2:3013081-3013100	3013097	236	234	sense	NGG	AGTGCTGAAGAACTGGACAG	5	RNA2	AD49ZG	RGEN-seq
chr2:3306230-3306249	3306232	28	28	antisense	NGG	CCAGCTGAATGACTGTAAAT	5	RNA2	AD49ZG	RGEN-seq
chr2:3401132-3401151	3401134	7	6	antisense	NAG	TCTACAGAAGAACTGGAAAA	5	RNA2	AD49ZG	RGEN-seq
chr2:3517533-3517552	3517535	129	129	antisense	NGG	ACTGGAGGAAAACTGGAAAG	5	RNA2	AD49ZG	RGEN-seq
chr2:7734673-7734692	7734675	57	57	antisense	NAG	TCACCTGAAAAACTGAAAAG	4	RNA2	AD49ZG	RGEN-seq
chr2:10421016-10421035	10421032	307	256	sense	NGG	GATGCTGAGAGACAGGAAAG	4	RNA2	AD49ZG	RGEN-seq
chr2:12305828-12305847	12305830	198	196	antisense	NAG	GCTGCTGAAAAACAGGAAAT	4	RNA2	AD49ZG	RGEN-seq
chr2:12323193-12323212	12323195	118	117	antisense	NGG	CATGCTGATAGACTGGCATG	5	RNA2	AD49ZG	RGEN-seq
chr2:13028269-13028288	13028285	151	151	sense	NAG	ACCACAGAAAGACTGGGAAG	5	RNA2	AD49ZG	RGEN-seq
chr2:15164610-15164629	15164612	21	21	antisense	NAG	TCTTACTAAAAACTGGAAAG	5	RNA2	AD49ZG	RGEN-seq
chr2:15658280-15658299	15658282	237	235	antisense	NGG	CCAGAGGAAAGACTGGAAAT	5	RNA2	AD49ZG	RGEN-seq
chr2:17445016-17445035	17445018	10	10	antisense	NAG	GCTGCATCAAGACTGGCAAG	5	RNA2	AD49ZG	RGEN-seq
chr2:19096794-19096813	19096796	140	140	antisense	NGG	TTCCCTGAAGGACTAGAAAG	5	RNA2	AD49ZG	RGEN-seq
chr2:19542337-19542356	19542353	11	11	sense	NAG	TCTGCTGATTGACTGGAAGA	4	RNA2	AD49ZG	RGEN-seq
chr2:22948297-22948316	22948299	9	9	antisense	NGG	TCTTCTGTAAGATTGAAAAC	5	RNA2	AD49ZG	RGEN-seq
chr2:23116234-23116253	23116236	21	21	antisense	NAG	TTTGTTTAAAAACTGGAAAG	4	RNA2	AD49ZG	RGEN-seq
chr2:24528343-24528362	24528359	3	3	sense	NGG	TTTGGAAAGAGACTGGAAAG	5	RNA2	AD49ZG	RGEN-seq
chr2:26384282-26384301	26384298	281	281	sense	NGG	AAAGCTGGAAGACTGGACAG	5	RNA2	AD49ZG	RGEN-seq
chr2:29032507-29032526	29032509	84	82	antisense	NGG	TAATGTTAAAGACTGGAAAG	5	RNA2	AD49ZG	RGEN-seq
chr2:29148245-29148264	29148247	216	213	antisense	NGG	TGAGCTGTAAAACTAGAAAG	5	RNA2	AD49ZG	RGEN-seq
chr2:33100156-33100175	33100172	82	82	sense	NGG	TCTGCAGAAGGACTGGAGAG	3	RNA2	AD49ZG	RGEN-seq
chr2:33409458-33409477	33409474	31	31	sense	NAG	TTACCTGATAGACTAGAAAG	5	RNA2	AD49ZG	RGEN-seq
chr2:33987821-33987840	33987837	21	20	sense	NGG	TGAGCGAAAAGAATGGAAAG	5	RNA2	AD49ZG	RGEN-seq
chr2:35906016-35906035	35906032	4	3	sense	NGG	TATAATGAGAGACAGGAAAG	5	RNA2	AD49ZG	RGEN-seq
chr2:36436203-36436222	36436219	6	6	sense	NAG	GATGCTAAAATAATGGAAAG	5	RNA2	AD49ZG	RGEN-seq
chr2:38565421-38565440	38565423	97	96	antisense	NGG	TCAGCTGAGTGATTGGAAAG	4	RNA2	AD49ZG	RGEN-seq
chr2:40097624-40097643	40097640	3	3	sense	NGG	TCAGCAGAAAGACTGGTATC	5	RNA2	AD49ZG	RGEN-seq
chr2:44398846-44398865	44398848	278	277	antisense	NGG	TAAGCTTAAAAACTGGAAAC	5	RNA2	AD49ZG	RGEN-seq
chr2:50520202-50520221	50520218	4	4	sense	NAG	AATGCTGAGAGACTAGAGAG	5	RNA2	AD49ZG	RGEN-seq
chr2:51179975-51179994	51179991	50	50	sense	NAG	GATGATGAAAAACTGGAGAG	5	RNA2	AD49ZG	RGEN-seq
chr2:51556399-51556418	51556401	157	157	antisense	NGG	CCTGTAGAAACACTGAAAAG	5	RNA2	AD49ZG	RGEN-seq
chr2:53407087-53407106	53407103	105	101	sense	NAG	AGTGCTGAGAGACTGGAATA	5	RNA2	AD49ZG	RGEN-seq
chr2:55990043-55990062	55990059	57	56	sense	NGG	ACAGCTGAAACACAGGAAAA	5	RNA2	AD49ZG	RGEN-seq
chr2:57921361-57921380	57921363	6	6	antisense	NAG	TCTGCTGTAAGACTAGACCA	5	RNA2	AD49ZG	RGEN-seq
chr2:59920704-59920723	59920720	189	189	sense	NGG	TCTGCAGAAAGACTAAGAAG	4	RNA2	AD49ZG	RGEN-seq
chr2:60061536-60061555	60061552	282	282	sense	NGG	CCTGCAGAAAAACTGGGAAG	4	RNA2	AD49ZG	RGEN-seq
chr2:60350317-60350336	60350319	20	20	antisense	NAG	TGTAGAGAGAGACTGGAAAG	5	RNA2	AD49ZG	RGEN-seq
chr2:62472803-62472822	62472805	8	8	antisense	NAG	TCTAATGAGAGACTGAAATG	5	RNA2	AD49ZG	RGEN-seq
chr2:69715176-69715195	69715178	5	5	antisense	NGG	TCTTATGAAAAACTGGTAGG	5	RNA2	AD49ZG	RGEN-seq
chr2:70628022-70628041	70628038	29	29	sense	NGG	AGTGCTGAAAGCCAGAAAAG	5	RNA2	AD49ZG	RGEN-seq
chr2:71837850-71837869	71837866	34	33	sense	NGG	CCTGCCTAGGGACTGGAAAG	5	RNA2	AD49ZG	RGEN-seq
chr2:72296621-72296640	72296623	374	371	antisense	NGG	ACTACGGAAAGACTGGAATG	4	RNA2	AD49ZG	RGEN-seq
chr2:73559207-73559226	73559209	135	135	antisense	NGG	AGAGCTGAAAGGCAGGAAAG	5	RNA2	AD49ZG	RGEN-seq
chr2:73936690-73936709	73936692	77	74	antisense	NGG	TCTAATGAAAGACAGGAAGG	4	RNA2	AD49ZG	RGEN-seq
chr2:74069510-74069529	74069526	3	3	sense	NAG	AATGCTACAAGACTGTAAAG	5	RNA2	AD49ZG	RGEN-seq
chr2:75333575-75333594	75333577	6	6	antisense	NGG	GCGGCTGGAATACTGGGAAG	5	RNA2	AD49ZG	RGEN-seq
chr2:75344919-75344938	75344921	34	34	antisense	NGG	CCTTCTGAAAGACTCCAAAG	4	RNA2	AD49ZG	RGEN-seq
chr2:75384380-75384399	75384396	375	371	sense	NGG	GCTGCAGGAAGACAGGAAAG	4	RNA2	AD49ZG	RGEN-seq
chr2:76625578-76625597	76625594	316	314	sense	NAG	TTAGGTGAAAGACAGGAAAG	4	RNA2	AD49ZG	RGEN-seq
chr2:76697297-76697316	76697299	9	9	antisense	NAG	TCTGTGGAAAGACTGTGAAG	4	RNA2	AD49ZG	RGEN-seq
chr2:78500223-78500242	78500239	63	63	sense	NAG	TCTAATGAAAGACAGAAAAG	4	RNA2	AD49ZG	RGEN-seq
chr2:79413407-79413426	79413409	4	4	antisense	NAG	TCTGAATAAACATTGGAAAG	5	RNA2	AD49ZG	RGEN-seq
chr2:80962258-80962277	80962274	293	292	sense	NAG	TCTGTAGAAAGACAGGAAAG	3	RNA2	AD49ZG	RGEN-seq
chr2:82366030-82366049	82366046	28	28	sense	NGG	TGTGAGCAAAGACTGGAAAT	5	RNA2	AD49ZG	RGEN-seq
chr2:87146834-87146853	87146850	11	11	sense	NGG	TTTGATGATGGATTGGAAAG	5	RNA2	AD49ZG	RGEN-seq
chr2:89413305-89413324	89413307	170	169	antisense	NGG	TCTTTTGAAAGTCTGGAAAG	3	RNA2	AD49ZG	RGEN-seq
chr2:93198220-93198239	93198236	177	174	sense	NGG	ACTGCTGAAAGAGTAGAAAG	3	RNA2	AD49ZG	RGEN-seq
chr2:95123795-95123814	95123797	295	293	antisense	NGG	GCAGCTAAAAGACAGGAAAG	4	RNA2	AD49ZG	RGEN-seq
chr2:99054352-99054371	99054354	231	225	antisense	NGG	CTTGTTGAAAGACTGGAACT	5	RNA2	AD49ZG	RGEN-seq
chr2:102940431-102940450	102940447	18	17	sense	NAG	TTCACAGAAAGAATGGAAAG	5	RNA2	AD49ZG	RGEN-seq
chr2:103435487-103435506	103435503	73	72	sense	NGG	TCTACAGGAAGACTGGATGG	5	RNA2	AD49ZG	RGEN-seq
chr2:107306409-107306428	107306425	320	318	sense	NAG	TCTGACCAAAGACTGGAAAG	3	RNA2	AD49ZG	RGEN-seq
chr2:112459508-112459527	112459524	5	5	sense	NAG	TTGGTGAAAAGACTGGAAAG	5	RNA2	AD49ZG	RGEN-seq
chr2:113663315-113663334	113663331	3	3	sense	NAG	TCAGTTGAGATACTGGAAAG	4	RNA2	AD49ZG	RGEN-seq
chr2:116463319-116463338	116463335	17	17	sense	NAG	GGTGTAGAAAGACTGGAAAT	5	RNA2	AD49ZG	RGEN-seq
chr2:118942526-118942545	118942542	22	22	sense	NGG	TAAGCTGAAAGAGAGGATAG	5	RNA2	AD49ZG	RGEN-seq
chr2:121714085-121714104	121714101	143	142	sense	NGG	TAAGCAGAAAGACTTGAATG	5	RNA2	AD49ZG	RGEN-seq
chr2:123470325-123470344	123470327	29	29	antisense	NGG	TCTAATGAGAGACAGAAAAG	5	RNA2	AD49ZG	RGEN-seq
chr2:123740754-123740773	123740770	24	24	sense	NGG	TCTACTGTAAGTCTGAAAAT	5	RNA2	AD49ZG	RGEN-seq
chr2:125726302-125726321	125726304	19	19	antisense	NAG	TCCTAAGAAAGAATGGAAAG	5	RNA2	AD49ZG	RGEN-seq
chr2:126413344-126413363	126413360	15	15	sense	NAG	TCTGGTCAATGACTGGAAAG	3	RNA2	AD49ZG	RGEN-seq
chr2:128789714-128789733	128789716	7	7	antisense	NAG	TCAACTGAAAGATTGGGAAG	4	RNA2	AD49ZG	RGEN-seq
chr2:129250842-129250861	129250858	73	70	sense	NGG	ACTGCTGGAAGACTGGACAC	4	RNA2	AD49ZG	RGEN-seq
chr2:131175662-131175681	131175678	25	25	sense	NGG	TCTTCTGAGAAACTGGTAAT	5	RNA2	AD49ZG	RGEN-seq
chr2:141856943-141856962	141856959	52	51	sense	NGG	TTTGAGGAAAGACTAGAAAC	5	RNA2	AD49ZG	RGEN-seq
chr2:143329991-143330010	143330007	11	10	sense	NAG	TATTCTGTAAGACTGGAAAA	4	RNA2	AD49ZG	RGEN-seq
chr2:149021957-149021976	149021973	122	121	sense	NGG	GCAGCTTAGAGACTAGAAAG	5	RNA2	AD49ZG	RGEN-seq
chr2:151955590-151955609	151955606	363	362	sense	NGG	TCTGCCAGAAAACTGGAATG	5	RNA2	AD49ZG	RGEN-seq
chr2:155357443-155357462	155357459	263	261	sense	NGG	CTTGCAGAAGGACTGGAATG	5	RNA2	AD49ZG	RGEN-seq
chr2:155864742-155864761	155864758	24	24	sense	NAG	CCATCAGTAAGACTGGAAAG	5	RNA2	AD49ZG	RGEN-seq
chr2:156288648-156288667	156288664	143	140	sense	NGG	ATTTCTGAATCACTGGAAAG	5	RNA2	AD49ZG	RGEN-seq
chr2:159026900-159026919	159026916	171	170	sense	NGG	TCTCCAGAATAACTGAAAAG	5	RNA2	AD49ZG	RGEN-seq
chr2:159552021-159552040	159552037	73	72	sense	NGG	TCTGATGAGAGACAGAAAAG	4	RNA2	AD49ZG	RGEN-seq
chr2:161474859-161474878	161474875	8	8	sense	NGG	TCTCTGAAAAGACTGGTAAG	5	RNA2	AD49ZG	RGEN-seq
chr2:161881625-161881644	161881641	16	15	sense	NGG	CCTGCTGGCAGATTGGAGAG	5	RNA2	AD49ZG	RGEN-seq
chr2:164355329-164355348	164355345	35	35	sense	NGG	TGTGCTGTCAGACTAGAAAA	5	RNA2	AD49ZG	RGEN-seq
chr2:165027895-165027914	165027897	261	259	antisense	NGG	TCGGCAGAAATACTGGACAG	4	RNA2	AD49ZG	RGEN-seq
chr2:165684149-165684168	165684165	37	37	sense	NGG	TCTCCTGGGAAACTGGAATG	5	RNA2	AD49ZG	RGEN-seq
chr2:168231966-168231985	168231968	31	30	antisense	NGG	TCTGAGAAATGATTGGAAAG	5	RNA2	AD49ZG	RGEN-seq
chr2:171377307-171377326	171377309	106	105	antisense	NGG	GTTGGTGAAGGACTGGAATG	5	RNA2	AD49ZG	RGEN-seq
chr2:173088771-173088790	173088787	5	4	sense	NAG	GATGCTGAAACACTGGTAAA	5	RNA2	AD49ZG	RGEN-seq
chr2:173557422-173557441	173557438	10	10	sense	NGG	TGAACAGATAGACTGGAAAG	5	RNA2	AD49ZG	RGEN-seq
chr2:175584250-175584269	175584252	30	30	antisense	NGG	ACTGCTGCTAGACTGGGAAC	5	RNA2	AD49ZG	RGEN-seq
chr2:176530737-176530756	176530739	15	15	antisense	NGG	TATGCTGTAAGACTCCAAAG	4	RNA2	AD49ZG	RGEN-seq
chr2:179083057-179083076	179083073	309	304	sense	NAG	CCAGCAGAAAGACTGGAGAG	4	RNA2	AD49ZG	RGEN-seq
chr2:179355629-179355648	179355631	16	16	antisense	NAG	AGAGCTGCAAGACTGGAAGG	5	RNA2	AD49ZG	RGEN-seq
chr2:181835043-181835062	181835045	328	326	antisense	NGG	TCTACTGAATAGCTGGAAAG	4	RNA2	AD49ZG	RGEN-seq
chr2:187103670-187103689	187103672	58	56	antisense	NAG	AATACTGAAACACTGGAAAA	5	RNA2	AD49ZG	RGEN-seq
chr2:189861507-189861526	189861509	201	199	antisense	NGG	GGTGCTGAAGGACTGAACAG	5	RNA2	AD49ZG	RGEN-seq
chr2:190765427-190765446	190765429	18	18	antisense	NGG	TAGGTTGAAAGGCTGGATAG	5	RNA2	AD49ZG	RGEN-seq
chr2:190936017-190936036	190936033	168	168	sense	NGG	ACTGCTGAAGGGCTGAAAAG	4	RNA2	AD49ZG	RGEN-seq
chr2:192808691-192808710	192808707	6	6	sense	NAG	TCTGATAAATGACTGGAAAT	4	RNA2	AD49ZG	RGEN-seq
chr2:194565489-194565508	194565505	3	3	sense	NAG	TTTGCTGAAATATTGAAAAG	4	RNA2	AD49ZG	RGEN-seq
chr2:199265378-199265397	199265380	15	15	antisense	NGG	TCTTGGAAAAAACTGGAAAG	5	RNA2	AD49ZG	RGEN-seq
chr2:200355608-200355627	200355624	170	170	sense	NGG	TGGGCAGAAAGACTGCAAAG	4	RNA2	AD49ZG	RGEN-seq
chr2:207052058-207052077	207052060	4	4	antisense	NGG	AATGCTGAAAGTCAGGAAAA	5	RNA2	AD49ZG	RGEN-seq
chr2:207917948-207917967	207917950	8	8	antisense	NGG	TCTAGTGTAAGACTGGAGGG	5	RNA2	AD49ZG	RGEN-seq
chr2:209798231-209798250	209798247	165	165	sense	NAG	GAAGCTGAGAGATTGGAAAG	5	RNA2	AD49ZG	RGEN-seq
chr2:211134277-211134296	211134293	50	50	sense	NGG	TCTGCAGCCACACTGAAAAG	5	RNA2	AD49ZG	RGEN-seq
chr2:214300327-214300346	214300343	10	10	sense	NAG	TCTCTAGCAAGACTGAAAAG	5	RNA2	AD49ZG	RGEN-seq
chr2:215091801-215091820	215091817	15	15	sense	NGG	TCTGGGGAAAGTCTAGAAAG	4	RNA2	AD49ZG	RGEN-seq
chr2:221523301-221523320	221523303	94	89	antisense	NAG	TTTGCTGAAAGAAATGAAAA	5	RNA2	AD49ZG	RGEN-seq
chr2:222561927-222561946	222561943	314	310	sense	NAG	CCTGATTAAAAACTGGAAAG	4	RNA2	AD49ZG	RGEN-seq
chr2:223867993-223868012	223868009	4	4	sense	NGG	CCTTCTGAACAGCTGGAAAG	5	RNA2	AD49ZG	RGEN-seq
chr2:225510946-225510965	225510962	18	18	sense	NGG	TATGTAGAAAGAATGGAAAC	5	RNA2	AD49ZG	RGEN-seq
chr2:227077844-227077863	227077860	6	6	sense	NGG	TATACTAAAAGAATTGAAAG	5	RNA2	AD49ZG	RGEN-seq
chr2:228619960-228619979	228619976	29	29	sense	NGG	TCTGATGGTAGATTGGAAAA	5	RNA2	AD49ZG	RGEN-seq
chr2:230510361-230510380	230510377	41	40	sense	NGG	TCTACATAAAGACAGGAAAA	5	RNA2	AD49ZG	RGEN-seq
chr2:231813303-231813322	231813319	33	33	sense	NGG	TTTAATGAAACACTGGAGAG	5	RNA2	AD49ZG	RGEN-seq
chr2:231847099-231847118	231847101	157	154	antisense	NAG	ACATCTAAAAGACTGGAAAT	5	RNA2	AD49ZG	RGEN-seq
chr2:234605079-234605098	234605081	7	6	antisense	NAG	CAAGGTGAAAGACAGGAAAG	5	RNA2	AD49ZG	RGEN-seq
chr2:239685114-239685133	239685130	11	11	sense	NGG	TCTAATGAGAGACAGAAAAG	5	RNA2	AD49ZG	RGEN-seq
chr2:240857681-240857700	240857683	11	11	antisense	NGG	TTTGGAGAAAGACAGGAATG	5	RNA2	AD49ZG	RGEN-seq
chr2:240883673-240883692	240883689	14	14	sense	NGG	TCTGCTGAAAGACCTTAAAG	3	RNA2	AD49ZG	RGEN-seq
chr2:245626264-245626283	245626280	77	75	sense	NGG	CTTGCTGATAGACTGGATAT	5	RNA2	AD49ZG	RGEN-seq
chr2:247657357-247657376	247657373	143	141	sense	NAG	ACTTCAGAAATACTGGAAAG	4	RNA2	AD49ZG	RGEN-seq
chr2:248700262-248700281	248700264	7	7	antisense	NGG	ACAGGTGTAAGACTGGAGAG	5	RNA2	AD49ZG	RGEN-seq
chr2:248939094-248939113	248939096	13	13	antisense	NGG	TCTGCTAAAGGCCTGGAATG	4	RNA2	AD49ZG	RGEN-seq
chr2:250423822-250423841	250423838	25	25	sense	NGG	TCTAATGAGAGACAGAAAAG	5	RNA2	AD49ZG	RGEN-seq
chr2:250640397-250640416	250640399	6	4	antisense	NGG	TCTTCAAAAAGAGAGGAAAG	5	RNA2	AD49ZG	RGEN-seq
chr2:250851812-250851831	250851828	38	38	sense	NGG	TCTACAGAGAGACAGAAAAG	5	RNA2	AD49ZG	RGEN-seq
chr2:251493301-251493320	251493303	14	14	antisense	NGG	CCTGCAGAAAGATTAGGAAG	5	RNA2	AD49ZG	RGEN-seq
chr2:252526605-252526624	252526621	368	368	sense	NGG	CTTACTGAAAAACTGAAAAG	5	RNA2	AD49ZG	RGEN-seq
chr2:257212865-257212884	257212867	49	49	antisense	NGG	ACTTGTGAAAAACTGGAAAC	5	RNA2	AD49ZG	RGEN-seq
chr2:260033742-260033761	260033758	204	204	sense	NAG	GCTGATGTAAGACTGGAGAG	4	RNA2	AD49ZG	RGEN-seq
chr2:261395213-261395232	261395215	338	258	antisense	NGG	TTAGCTGAAACACTGGTTAG	5	RNA2	AD49ZG	RGEN-seq
chr2:263767537-263767556	263767539	166	166	antisense	NGG	AGAGCTGAAAGACTGCAAAA	5	RNA2	AD49ZG	RGEN-seq
chr2:269878523-269878542	269878525	57	57	antisense	NAG	TATCTAGAAAGACTAGAAAG	5	RNA2	AD49ZG	RGEN-seq
chr2:276251071-276251090	276251073	25	24	antisense	NAG	CCAACTGAATGACTGGAAAT	5	RNA2	AD49ZG	RGEN-seq
chr2:277686478-277686497	277686480	14	14	antisense	NGG	TCAGCAGAAAAACTTTAAAG	5	RNA2	AD49ZG	RGEN-seq
chr2:283553793-283553812	283553795	76	76	antisense	NGG	TTAGATGTAATACTGGAAAG	5	RNA2	AD49ZG	RGEN-seq
chr2:285487207-285487226	285487209	40	40	antisense	NGG	TCATCTTAAAGACTGAAAGG	5	RNA2	AD49ZG	RGEN-seq
chr2:288025825-288025844	288025827	45	43	antisense	NGG	TATGCTTAAAGACTAGGAAT	5	RNA2	AD49ZG	RGEN-seq
chr2:288982299-288982318	288982315	269	267	sense	NGG	TCATGTGAAAGAATGGAAAG	4	RNA2	AD49ZG	RGEN-seq
chr2:289401145-289401164	289401147	84	83	antisense	NGG	TCTGCCCCAAGACTGGGAAG	4	RNA2	AD49ZG	RGEN-seq
chr2:290245166-290245185	290245182	216	215	sense	NGG	ACATTTGAAAGACTAGAAAG	5	RNA2	AD49ZG	RGEN-seq
chr2:290438583-290438602	290438599	3	3	sense	NGG	TCTAGTGACAGACTGGATAT	5	RNA2	AD49ZG	RGEN-seq
chr2:293335689-293335708	293335691	12	12	antisense	NGG	TCTACTGCAAAGCTGGAGAG	5	RNA2	AD49ZG	RGEN-seq
chr2:294505928-294505947	294505944	4	4	sense	NAG	ACTATTGAAAAACTTGAAAG	5	RNA2	AD49ZG	RGEN-seq
chr2:295260839-295260858	295260855	3	3	sense	NAG	GCAGCTGACTGACTAGAAAG	5	RNA2	AD49ZG	RGEN-seq
chr2:295693281-295693300	295693297	7	7	sense	NGG	TCTGAGGAAGGACTGGAGAA	5	RNA2	AD49ZG	RGEN-seq
chr2:299226032-299226051	299226048	6	6	sense	NAG	TATGCAGAAATACTGGATAG	4	RNA2	AD49ZG	RGEN-seq
chr2:299395353-299395372	299395369	9	9	sense	NAG	TGTGCAGAAAGACTGAAATA	5	RNA2	AD49ZG	RGEN-seq
chr2:299451767-299451786	299451783	3	3	sense	NGG	TTTGATCAAATACTGAAAAG	5	RNA2	AD49ZG	RGEN-seq
chr2:301309126-301309145	301309128	12	12	antisense	NGG	CCAGCTGAAGGACTGGAGGG	5	RNA2	AD49ZG	RGEN-seq
chr2:301784463-301784482	301784465	5	5	antisense	NAG	AGAGCTGGAAGACTGGCAAG	5	RNA2	AD49ZG	RGEN-seq
chr2:304717991-304718010	304717993	5	5	antisense	NGG	TCTGTTGGGAAACTGGAAAC	5	RNA2	AD49ZG	RGEN-seq
chr2:308059455-308059474	308059457	153	152	antisense	NGG	ACTGCTGAAAACCTGGAAAG	3	RNA2	AD49ZG	RGEN-seq
chr2:308169402-308169421	308169418	57	57	sense	NGG	TCTCATGACAGATTGGAAAG	4	RNA2	AD49ZG	RGEN-seq
chr2:311145617-311145636	311145633	147	145	sense	NGG	TCTGCAAGCAGACTGGAGAG	5	RNA2	AD49ZG	RGEN-seq
chr2:312576362-312576381	312576364	11	11	antisense	NAG	TGTGCTGCAAGGCTGAAAAG	4	RNA2	AD49ZG	RGEN-seq
chr2:314395089-314395108	314395105	12	12	sense	NAG	ACTGATGATAAATTGGAAAG	5	RNA2	AD49ZG	RGEN-seq
chr2:320917267-320917286	320917269	280	276	antisense	NGG	ATTGATGGAAGACTGGAAAT	5	RNA2	AD49ZG	RGEN-seq
chr2:323002610-323002629	323002626	4	4	sense	NGG	CCTGAGGAAAGCCAGGAAAG	5	RNA2	AD49ZG	RGEN-seq
chr2:331870369-331870388	331870371	23	23	antisense	NAG	TGTGCTGAAAGCCTGGAAAT	3	RNA2	AD49ZG	RGEN-seq
chr2:333266146-333266165	333266148	159	158	antisense	NAG	TCTGCTGACAAACTGGAAAT	3	RNA2	AD49ZG	RGEN-seq
chr2:334803269-334803288	334803271	38	17	antisense	NGG	GCAGCTGACAGACTGGGAAA	5	RNA2	AD49ZG	RGEN-seq
chr2:334828466-334828485	334828468	47	47	antisense	NGG	TCCACTAAAAGCCTGGAAAT	5	RNA2	AD49ZG	RGEN-seq
chr2:346396992-346397011	346396994	178	173	antisense	NGG	AATTCTGAAAGACTGGATTG	5	RNA2	AD49ZG	RGEN-seq
chr2:347081547-347081566	347081549	16	16	antisense	NGG	TATTCTGAAAGACAGGACTG	5	RNA2	AD49ZG	RGEN-seq
chr2:348872430-348872449	348872446	198	197	sense	NGG	GCACCAGAAACACTGGAAAG	5	RNA2	AD49ZG	RGEN-seq
chr2:348890734-348890753	348890750	18	18	sense	NGG	TGCTCTGAAAGACAGGAGAG	5	RNA2	AD49ZG	RGEN-seq
chr2:351449376-351449395	351449392	174	172	sense	NAG	TGTGCTGTAAGACTAGAAAG	3	RNA2	AD49ZG	RGEN-seq
chr2:352331219-352331238	352331235	124	124	sense	NGG	TCTGACTAAAGACTGGAAGA	5	RNA2	AD49ZG	RGEN-seq
chr2:359621823-359621842	359621825	6	6	antisense	NGG	GCTGAAGAATGACTGGACAG	5	RNA2	AD49ZG	RGEN-seq
chr2:361724240-361724259	361724256	34	34	sense	NAG	TCTTTGTAAAGACTGAAAAG	5	RNA2	AD49ZG	RGEN-seq
chr2:362495135-362495154	362495137	390	386	antisense	NGG	GGGGGTGAAAGATTGGAAAG	5	RNA2	AD49ZG	RGEN-seq
chr2:368590875-368590894	368590891	3	3	sense	NGG	TCTGTGGAAGGACTGGATAA	5	RNA2	AD49ZG	RGEN-seq
chr2:371124486-371124505	371124502	13	13	sense	NGG	TGGGCTGATAGACTGGTAGG	5	RNA2	AD49ZG	RGEN-seq
chr2:371336623-371336642	371336625	57	55	antisense	NGG	TTAGCTGAAAGATGGAAAAG	5	RNA2	AD49ZG	RGEN-seq
chr2:375262557-375262576	375262559	6	5	antisense	NAG	TCTACTCAAAAACTGGGAAA	5	RNA2	AD49ZG	RGEN-seq
chr2:375579792-375579811	375579808	4	4	sense	NGG	TGGGCGGAAGGACTGGAAAT	5	RNA2	AD49ZG	RGEN-seq
chr2:376343649-376343668	376343651	33	33	antisense	NGG	TCTGGACAAAGACTGGAGAA	5	RNA2	AD49ZG	RGEN-seq
chr2:376677322-376677341	376677324	6	5	antisense	NAG	TTAGCAGACACACTGGAAAG	5	RNA2	AD49ZG	RGEN-seq
chr2:377644995-377645014	377644997	159	159	antisense	NGG	ACTACTGGGAGACTGGGAAG	5	RNA2	AD49ZG	RGEN-seq
chr2:379238167-379238186	379238183	5	5	sense	NGG	GCTCTTGAAGGACTGAAAAG	5	RNA2	AD49ZG	RGEN-seq
chr2:383099135-383099154	383099137	9	9	antisense	NGG	TCCTGTGAAAGCCTGGGAAG	5	RNA2	AD49ZG	RGEN-seq
chr2:384768451-384768470	384768453	5	5	antisense	NAG	ACTGAGGAAACACCGGAAAG	5	RNA2	AD49ZG	RGEN-seq
chr2:391132039-391132058	391132055	16	16	sense	NGG	TCTGCAGTAAGACCAAAAAG	5	RNA2	AD49ZG	RGEN-seq
chr2:391924104-391924123	391924106	62	62	antisense	NGG	ACAGCTGGGAGACTGGGAAG	5	RNA2	AD49ZG	RGEN-seq
chr2:392098249-392098268	392098265	5	4	sense	NAG	TAAGAGGAAGGACTGGAAAG	5	RNA2	AD49ZG	RGEN-seq
chr2:397269668-397269687	397269670	88	87	antisense	NGG	TCTGACAAAAGACTAGAAAC	5	RNA2	AD49ZG	RGEN-seq
chr2:398866864-398866883	398866866	161	158	antisense	NAG	TTCTGTGATAGACTGGAAAG	5	RNA2	AD49ZG	RGEN-seq
chr2:401734467-401734486	401734483	17	17	sense	NAG	GCAGGTAAAAGACTGGAAAT	5	RNA2	AD49ZG	RGEN-seq
chr2:403502455-403502474	403502457	290	284	antisense	NGG	TGGGTTGAAAAACTAGAAAG	5	RNA2	AD49ZG	RGEN-seq
chr2:405234974-405234993	405234976	70	70	antisense	NGG	CCAGTTGAAAGACTGGAGGG	5	RNA2	AD49ZG	RGEN-seq
chr2:405470671-405470690	405470673	527	517	antisense	NGG	GGTGCTGAAAGAGAGGAAAG	4	RNA2	AD49ZG	RGEN-seq
chr2:406047487-406047506	406047503	415	409	sense	NGG	GGTGAGGAAAGACTGGAATG	5	RNA2	AD49ZG	RGEN-seq
chr2:406199215-406199234	406199231	4	4	sense	NGG	TGAGTGGAAGGACTGGAAAG	5	RNA2	AD49ZG	RGEN-seq
chr2:410175683-410175702	410175699	3	3	sense	NGG	TCTGCTGAATTCCTGGGAAG	4	RNA2	AD49ZG	RGEN-seq
chr2:410580409-410580428	410580425	117	117	sense	NGG	TGAGCCAAAAGTCTGGAAAG	5	RNA2	AD49ZG	RGEN-seq
chr2:413656630-413656649	413656632	3	3	antisense	NGG	TCTAATGAAAGACAGAAAGG	5	RNA2	AD49ZG	RGEN-seq
chr2:417349483-417349502	417349485	188	187	antisense	NAG	ATTGCAGAAAGATTGGAAAG	4	RNA2	AD49ZG	RGEN-seq
chr2:417566918-417566937	417566934	5	5	sense	NGG	TATGCAGAAACACGGGAAAG	4	RNA2	AD49ZG	RGEN-seq
chr2:418491313-418491332	418491329	19	18	sense	NAG	ACAGAAGTAAGACTGGAAAG	5	RNA2	AD49ZG	RGEN-seq
chr2:419446991-419447010	419446993	17	17	antisense	NGG	TCTTCTCAAAGACTATAAAG	4	RNA2	AD49ZG	RGEN-seq
chr2:419811620-419811639	419811636	5	5	sense	NGG	TGTACTCTAAGACTGGAAAA	5	RNA2	AD49ZG	RGEN-seq
chr2:422556231-422556250	422556247	4	4	sense	NGG	TCTGTTGACGAACTGGAAAC	5	RNA2	AD49ZG	RGEN-seq
chr2:422795410-422795429	422795412	8	8	antisense	NAG	CCTGCTGAAAGGCTGAAAAA	4	RNA2	AD49ZG	RGEN-seq
chr2:423304396-423304415	423304398	95	95	antisense	NAG	TGAGCTGAAAAACTGGACAG	4	RNA2	AD49ZG	RGEN-seq
chr2:423345995-423346014	423346011	261	261	sense	NAG	TCTGAAGAATGACTGAAAAG	4	RNA2	AD49ZG	RGEN-seq
chr2:424788866-424788885	424788882	15	15	sense	NAG	TCAGCTAAATGACTGGAAAT	4	RNA2	AD49ZG	RGEN-seq
chr2:426113053-426113072	426113069	7	7	sense	NGG	TCAGCTGTAGAACTGGGAAG	5	RNA2	AD49ZG	RGEN-seq
chr2:429453219-429453238	429453235	218	218	sense	NGG	TCTGCAGTATAACTGGAAAT	5	RNA2	AD49ZG	RGEN-seq
chr2:429971609-429971628	429971625	3	3	sense	NAG	TGGGCTTAAAGACAGGAAAT	5	RNA2	AD49ZG	RGEN-seq
chr2:433550774-433550793	433550776	44	43	antisense	NAG	ACTGGTAAAAGATTGGAAAG	4	RNA2	AD49ZG	RGEN-seq
chr2:436344616-436344635	436344632	25	25	sense	NAG	TGTACAGAAAGCCTGGAAAG	4	RNA2	AD49ZG	RGEN-seq
chr2:436420785-436420804	436420787	17	17	antisense	NGG	TTTGTTGAAAGAATGAAAAA	5	RNA2	AD49ZG	RGEN-seq
chr2:437459857-437459876	437459859	4	4	antisense	NGG	TCTGCTTTAAGACTGAAATT	5	RNA2	AD49ZG	RGEN-seq
chr2:440548596-440548615	440548612	5	5	sense	NGG	TGAGCTGACATACTGGAAAA	5	RNA2	AD49ZG	RGEN-seq
chr2:443084717-443084736	443084733	160	160	sense	NGG	GAAGCTGAGAGACTGGTAAG	5	RNA2	AD49ZG	RGEN-seq
chr2:448689110-448689129	448689126	242	239	sense	NAG	CATGCTAAAACACTGGAAAG	4	RNA2	AD49ZG	RGEN-seq
chr2:450793240-450793259	450793242	4	3	antisense	NAG	TCTGCTTTTATACTAGAAAG	5	RNA2	AD49ZG	RGEN-seq
chr2:452404226-452404245	452404228	30	29	antisense	NAG	ACTGGTGAATGACTGGAAAA	4	RNA2	AD49ZG	RGEN-seq
chr2:455851043-455851062	455851059	192	189	sense	NAG	GATGCTGAAAGTATGGAAAG	4	RNA2	AD49ZG	RGEN-seq
chr2:456344828-456344847	456344844	7	6	sense	NAG	CCTGCTGGAAGCATGGAAAG	4	RNA2	AD49ZG	RGEN-seq
chr2:456429118-456429137	456429134	161	158	sense	NGG	GCAGCTAAAAGGCTGGAATG	5	RNA2	AD49ZG	RGEN-seq
chr2:460212091-460212110	460212093	158	158	antisense	NGG	TTGTCTGAAAGACTAGGAAG	5	RNA2	AD49ZG	RGEN-seq
chr2:460286032-460286051	460286034	10	6	antisense	NGG	TCTGTTGAAAGACAGAAAGG	4	RNA2	AD49ZG	RGEN-seq
chr2:460350009-460350028	460350025	22	22	sense	NAG	TCATCTGAAGAACTGGAAAG	4	RNA2	AD49ZG	RGEN-seq
chr2:461202889-461202908	461202891	152	148	antisense	NGG	TGAGCTGAAAGGCTGGAGAG	4	RNA2	AD49ZG	RGEN-seq
chr2:462534056-462534075	462534072	12	12	sense	NGG	TCTGCTGTGTAACAGGAAAG	5	RNA2	AD49ZG	RGEN-seq
chr3:833215-833234	833217	84	81	antisense	NAG	TGAAGTGAAACACTGGAAAG	5	RNA2	AD49ZG	RGEN-seq
chr3:4813658-4813677	4813674	17	17	sense	NGG	CCTGATGAAAGACAGAAAGG	5	RNA2	AD49ZG	RGEN-seq
chr3:4828283-4828302	4828285	136	135	antisense	NAG	TCAACTTAAAAACTGGAAAG	4	RNA2	AD49ZG	RGEN-seq
chr3:5512417-5512436	5512419	4	4	antisense	NAG	TGGACAGAAAGACGGGAAAG	5	RNA2	AD49ZG	RGEN-seq
chr3:6685368-6685387	6685370	4	4	antisense	NAG	TCTCCAAATAAACTGGAAAG	5	RNA2	AD49ZG	RGEN-seq
chr3:6894683-6894702	6894685	29	29	antisense	NGG	CATGCTGAGAGACTGGAGGG	5	RNA2	AD49ZG	RGEN-seq
chr3:7103000-7103019	7103016	222	222	sense	NGG	TCTGCACTAAAACTGGAAAA	5	RNA2	AD49ZG	RGEN-seq
chr3:8445138-8445157	8445154	3	3	sense	NAG	TAGGCTGTAACACTGGAAAA	5	RNA2	AD49ZG	RGEN-seq
chr3:10093568-10093587	10093584	36	36	sense	NGG	TCAGCAGAGAAACTGGCAAG	5	RNA2	AD49ZG	RGEN-seq
chr3:13711305-13711324	13711321	3	3	sense	NGG	TCTGCTGGCAGACTGATAAT	5	RNA2	AD49ZG	RGEN-seq
chr3:14316158-14316177	14316160	267	266	antisense	NGG	AATACAAAAAGACTGGAAAG	5	RNA2	AD49ZG	RGEN-seq
chr3:15801596-15801615	15801612	145	145	sense	NGG	CATGCTGAAACACTGTTAAG	5	RNA2	AD49ZG	RGEN-seq
chr3:16495542-16495561	16495544	327	323	antisense	NGG	TCTACTTTAAAACTAGAAAG	5	RNA2	AD49ZG	RGEN-seq
chr3:17148162-17148181	17148178	7	7	sense	NGG	TCTACAGAAAGAGTAGAAAA	5	RNA2	AD49ZG	RGEN-seq
chr3:17275660-17275679	17275676	404	402	sense	NGG	AATAGTGAAAGACTGGAATG	5	RNA2	AD49ZG	RGEN-seq
chr3:18002309-18002328	18002311	26	26	antisense	NGG	CCGGCTGAAAGACTGGTTCG	5	RNA2	AD49ZG	RGEN-seq
chr3:20570613-20570632	20570629	190	190	sense	NAG	ACTTTTGAAAGACTGGAAAG	3	RNA2	AD49ZG	RGEN-seq
chr3:20619751-20619770	20619767	336	334	sense	NGG	CTTGCTGTAAGACTGAAAAT	5	RNA2	AD49ZG	RGEN-seq
chr3:20702316-20702335	20702332	28	28	sense	NAG	AGTACTGCAAAACTGGAAAG	5	RNA2	AD49ZG	RGEN-seq
chr3:25133766-25133785	25133768	6	6	antisense	NAG	TCTGCCAAAAGACTGAAGAG	4	RNA2	AD49ZG	RGEN-seq
chr3:25269545-25269564	25269547	16	16	antisense	NAG	TCTACTGAGAGACAGAAAAG	4	RNA2	AD49ZG	RGEN-seq
chr3:26572439-26572458	26572455	104	104	sense	NGG	ACTGCAGATAAAATGGAAAG	5	RNA2	AD49ZG	RGEN-seq
chr3:30927933-30927952	30927949	44	43	sense	NGG	TCTGATTGAAGACTTAAAAG	5	RNA2	AD49ZG	RGEN-seq
chr3:34047067-34047086	34047069	112	109	antisense	NGG	TCTGGGGAAAGACTGGAGAA	4	RNA2	AD49ZG	RGEN-seq
chr3:34574262-34574281	34574278	70	70	sense	NGG	GGGGCTGAAAGACTGGAATC	5	RNA2	AD49ZG	RGEN-seq
chr3:34925021-34925040	34925037	3	3	sense	NAG	TCTGAGAAGTGACTGGAAAG	5	RNA2	AD49ZG	RGEN-seq
chr3:37911218-37911237	37911234	244	243	sense	NGG	TCTACTGAAAAACAGGAAAT	4	RNA2	AD49ZG	RGEN-seq
chr3:39821557-39821576	39821559	96	95	antisense	NAG	ACTTCTAAAACACTGGAAAG	4	RNA2	AD49ZG	RGEN-seq
chr3:40604714-40604733	40604716	9	9	antisense	NAG	TCAGCTGAGAAACTGGAAGG	4	RNA2	AD49ZG	RGEN-seq
chr3:42847585-42847604	42847601	11	9	sense	NAG	TTGACTGAAAGACTGGACAA	5	RNA2	AD49ZG	RGEN-seq
chr3:43022341-43022360	43022357	37	36	sense	NGG	TCGGCTGAGACACTGGACAG	4	RNA2	AD49ZG	RGEN-seq
chr3:44510291-44510310	44510307	113	109	sense	NGG	GCTGATAAAACACTGGAATG	5	RNA2	AD49ZG	RGEN-seq
chr3:45368004-45368023	45368006	5	5	antisense	NAG	TCTACTGAGAGACTGAAACA	5	RNA2	AD49ZG	RGEN-seq
chr3:46405096-46405115	46405112	7	5	sense	NAG	GCAGCAGAAAGAATGGAATG	5	RNA2	AD49ZG	RGEN-seq
chr3:47776864-47776883	47776880	8	8	sense	NAG	ACTATTGCAAGACTGAAAAG	5	RNA2	AD49ZG	RGEN-seq
chr3:48972364-48972383	48972366	42	42	antisense	NGG	ACTGCTTAATGAATGAAAAG	5	RNA2	AD49ZG	RGEN-seq
chr3:50134209-50134228	50134211	486	483	antisense	NGG	CTTGCTAAAAGACTGAACAG	5	RNA2	AD49ZG	RGEN-seq
chr3:51418719-51418738	51418721	19	19	antisense	NGG	TCTGCAGGGAAACTGGAAAC	5	RNA2	AD49ZG	RGEN-seq
chr3:53469406-53469425	53469422	236	235	sense	NAG	GATGCTGAAAAACTGGAAAA	4	RNA2	AD49ZG	RGEN-seq
chr3:54138493-54138512	54138509	35	35	sense	NGG	CATCCTGAAAGACTTGAAGG	5	RNA2	AD49ZG	RGEN-seq
chr3:57250209-57250228	57250225	30	30	sense	NAG	CCTCGTGGAAGACTGGAAAG	4	RNA2	AD49ZG	RGEN-seq
chr3:57950498-57950517	57950514	9	3	sense	NGG	TTTGCAAAAAGACTCAAAAG	5	RNA2	AD49ZG	RGEN-seq
chr3:59386828-59386847	59386844	17	15	sense	NGG	ATTGCAGAAGGAGTGGAAAG	5	RNA2	AD49ZG	RGEN-seq
chr3:59488285-59488304	59488287	23	22	antisense	NGG	GCTGTTGAAAGAATTGAAAG	4	RNA2	AD49ZG	RGEN-seq
chr3:63241311-63241330	63241313	273	272	antisense	NGG	TACACTGAAAGACTGGAAAT	4	RNA2	AD49ZG	RGEN-seq
chr3:64634626-64634645	64634642	272	270	sense	NAG	ATGGCTGAAAAACTGGAAAA	5	RNA2	AD49ZG	RGEN-seq
chr3:65333280-65333299	65333296	5	4	sense	NAG	ACAGCTGGAAGACAGAAAAG	5	RNA2	AD49ZG	RGEN-seq
chr3:65549573-65549592	65549575	367	366	antisense	NGG	TTTGCCTAAAGATTAGAAAG	5	RNA2	AD49ZG	RGEN-seq
chr3:65900828-65900847	65900844	121	121	sense	NGG	ACTGCAGGAAGAATAGAAAG	5	RNA2	AD49ZG	RGEN-seq
chr3:66658061-66658080	66658077	22	21	sense	NGG	CCTGGTGAGCGACTGGAAAG	4	RNA2	AD49ZG	RGEN-seq
chr3:66864471-66864490	66864473	326	326	antisense	NGG	TCTGCCAAAAGACTGCAAAG	3	RNA2	AD49ZG	RGEN-seq
chr3:74290651-74290670	74290653	32	32	antisense	NGG	TCTGCATGAGGACTGGAAAG	4	RNA2	AD49ZG	RGEN-seq
chr3:76388622-76388641	76388638	323	322	sense	NGG	GGTGGAGAAAGACTGGCAAG	5	RNA2	AD49ZG	RGEN-seq
chr3:77197732-77197751	77197748	435	435	sense	NGG	ACAGATGAAAGACTGGGAAG	4	RNA2	AD49ZG	RGEN-seq
chr3:79671641-79671660	79671657	7	7	sense	NGG	TCTGGAAAAATACTGGAAAT	5	RNA2	AD49ZG	RGEN-seq
chr3:80413018-80413037	80413020	304	303	antisense	NGG	TAAGCAAAAAGAATGGAAAG	5	RNA2	AD49ZG	RGEN-seq
chr3:81208123-81208142	81208139	18	17	sense	NGG	GATGCAGGAAGAGTGGAAAG	5	RNA2	AD49ZG	RGEN-seq
chr3:83730797-83730816	83730799	22	21	antisense	NGG	CCACTTGATAGACTGGAAAG	5	RNA2	AD49ZG	RGEN-seq
chr3:84696762-84696781	84696764	86	86	antisense	NGG	TCTGATAAAACACTGAAATG	5	RNA2	AD49ZG	RGEN-seq
chr3:84990143-84990162	84990159	154	152	sense	NAG	TCCTTTGAAAGACAGGAAAG	4	RNA2	AD49ZG	RGEN-seq
chr3:85000787-85000806	85000803	73	73	sense	NGG	GCTGAGGGAAGACTGGAATG	5	RNA2	AD49ZG	RGEN-seq
chr3:85876848-85876867	85876864	5	5	sense	NGG	TAGGCTGAAAGCCAGGACAG	5	RNA2	AD49ZG	RGEN-seq
chr3:86119535-86119554	86119551	18	17	sense	NGG	GCTGCTTCCAGGCTGGAAAG	5	RNA2	AD49ZG	RGEN-seq
chr3:86940029-86940048	86940031	145	144	antisense	NAG	TGTCAAGAAAGACTGGAAAA	5	RNA2	AD49ZG	RGEN-seq
chr3:88203544-88203563	88203546	23	22	antisense	NAG	CCTACTGAAATACTGATAAG	5	RNA2	AD49ZG	RGEN-seq
chr3:88400993-88401012	88400995	270	270	antisense	NAG	ACCCATGAAAGACTGAAAAG	5	RNA2	AD49ZG	RGEN-seq
chr3:88545064-88545083	88545080	19	18	sense	NAG	GCTGCTGAAAGAAGGGAAAG	3	RNA2	AD49ZG	RGEN-seq
chr3:89735149-89735168	89735151	254	253	antisense	NGG	TCTACATAAACACTGGAATG	5	RNA2	AD49ZG	RGEN-seq
chr3:90944300-90944319	90944316	14	13	sense	NGG	TCTGATAAGAATCTGGAAAG	5	RNA2	AD49ZG	RGEN-seq
chr3:93203830-93203849	93203846	88	88	sense	NGG	GATGATGTAAGACTGGAAAC	5	RNA2	AD49ZG	RGEN-seq
chr3:95454557-95454576	95454573	26	26	sense	NAG	TCTAATGAGAAACTGAAAAG	5	RNA2	AD49ZG	RGEN-seq
chr3:104345660-104345679	104345662	11	11	antisense	NAG	TCCACTAAAAGACTGAAAAT	5	RNA2	AD49ZG	RGEN-seq
chr3:105587286-105587305	105587302	4	4	sense	NAG	CATGGTGACAGACTGAAAAG	5	RNA2	AD49ZG	RGEN-seq
chr3:106286289-106286308	106286305	333	330	sense	NGG	TAAACTGAAAGACTGAAAAA	5	RNA2	AD49ZG	RGEN-seq
chr3:107722722-107722741	107722738	394	392	sense	NGG	TTTGCTGACAAACTAGAAAG	4	RNA2	AD49ZG	RGEN-seq
chr3:107971044-107971063	107971046	194	192	antisense	NGG	GGTGCTGTAAGACTAGCAAG	5	RNA2	AD49ZG	RGEN-seq
chr3:109941694-109941713	109941710	11	11	sense	NAG	AGTTCTGAAAGACTGGAGAA	5	RNA2	AD49ZG	RGEN-seq
chr3:113215926-113215945	113215928	5	5	antisense	NAG	TAGTCTTAAAGACTGGAAAT	5	RNA2	AD49ZG	RGEN-seq
chr3:117860971-117860990	117860987	219	215	sense	NGG	CAAGCTTAAAGCCTGGAAAG	5	RNA2	AD49ZG	RGEN-seq
chr3:118920077-118920096	118920093	85	84	sense	NGG	TCTGTTGTAAAACTGACAAG	5	RNA2	AD49ZG	RGEN-seq
chr3:120252077-120252096	120252093	29	29	sense	NGG	TAGGCTGAAAGACAAGGAAG	5	RNA2	AD49ZG	RGEN-seq
chr3:130777792-130777811	130777794	110	68	antisense	NAG	GATGATGAAAGAAAGGAAAG	5	RNA2	AD49ZG	RGEN-seq
chr3:130852477-130852496	130852493	5	5	sense	NGG	TGTGAAGGAAGTCTGGAAAG	5	RNA2	AD49ZG	RGEN-seq
chr3:133091009-133091028	133091025	4	4	sense	NAG	ACTGCTGAATAACTGAATAG	5	RNA2	AD49ZG	RGEN-seq
chr3:134301023-134301042	134301025	6	6	antisense	NAG	TCACTTTAAAGACTAGAAAG	5	RNA2	AD49ZG	RGEN-seq
chr3:138890502-138890521	138890504	9	9	antisense	NAG	ACAACTAAAAGACTGGAAAA	5	RNA2	AD49ZG	RGEN-seq
chr3:138900302-138900321	138900318	380	378	sense	NGG	TTGGCTAAAAGACTGGAGAG	4	RNA2	AD49ZG	RGEN-seq
chr3:139641232-139641251	139641234	6	6	antisense	NAG	TTTGCTTAAACACTGGAAAA	4	RNA2	AD49ZG	RGEN-seq
chr3:141581235-141581254	141581251	331	326	sense	NGG	CATACTGAAAGAGAGGAAAG	5	RNA2	AD49ZG	RGEN-seq
chr3:141616702-141616721	141616718	168	165	sense	NGG	AATGCAGAAAGAATGGATAG	5	RNA2	AD49ZG	RGEN-seq
chr3:142855084-142855103	142855100	44	44	sense	NGG	TCTACAGAAATACTGTAACG	5	RNA2	AD49ZG	RGEN-seq
chr3:142877436-142877455	142877452	46	46	sense	NGG	TTTGCTGATGGACTAAAAAG	5	RNA2	AD49ZG	RGEN-seq
chr3:144278605-144278624	144278621	12	12	sense	NAG	TCTAATGAGAGACAGGAAAG	4	RNA2	AD49ZG	RGEN-seq
chr3:144621154-144621173	144621170	95	95	sense	NAG	GCAGCTGCAAGACTGGACAG	4	RNA2	AD49ZG	RGEN-seq
chr3:150051649-150051668	150051651	56	55	antisense	NGG	ACTGCTGTGTGACAGGAAAG	5	RNA2	AD49ZG	RGEN-seq
chr3:151098234-151098253	151098250	103	102	sense	NGG	CATACTGAAAGAGTGGAGAG	5	RNA2	AD49ZG	RGEN-seq
chr3:151533891-151533910	151533893	212	211	antisense	NAG	AATGCAAAAAGACTGGATAG	5	RNA2	AD49ZG	RGEN-seq
chr3:152499997-152500016	152499999	14	14	antisense	NAG	AATGCAGAAAGAATAGAAAG	5	RNA2	AD49ZG	RGEN-seq
chr3:154498318-154498337	154498334	136	134	sense	NGG	ACTGCTGTGTGACTGGAATG	5	RNA2	AD49ZG	RGEN-seq
chr3:155563524-155563543	155563540	199	195	sense	NAG	ACAACTGAAAAACTGGAGAG	5	RNA2	AD49ZG	RGEN-seq
chr3:157413334-157413353	157413350	71	71	sense	NGG	TGTGCAGTAAGACTAGGAAG	5	RNA2	AD49ZG	RGEN-seq
chr3:162406321-162406340	162406337	56	38	sense	NAG	ACTGCAGAAAGACTGGGAAA	4	RNA2	AD49ZG	RGEN-seq
chr3:163791779-163791798	163791781	62	62	antisense	NAG	CTTCCTGAAAGACTTGAAAG	4	RNA2	AD49ZG	RGEN-seq
chr3:165115604-165115623	165115606	8	8	antisense	NGG	TCTAATGAAAGACAGAAAGG	5	RNA2	AD49ZG	RGEN-seq
chr3:165335754-165335773	165335770	3	3	sense	NAG	TTTCCTGAAAGACTGGATGT	5	RNA2	AD49ZG	RGEN-seq
chr3:167290009-167290028	167290025	39	38	sense	NGG	GTTCCTGAAAGACAGGAGAG	5	RNA2	AD49ZG	RGEN-seq
chr3:169924863-169924882	169924879	4	3	sense	NGG	TTTCATGAAACACTGGAAAA	5	RNA2	AD49ZG	RGEN-seq
chr3:170495862-170495881	170495864	97	96	antisense	NGG	CCTTCTGAATGACAGGAAAG	4	RNA2	AD49ZG	RGEN-seq
chr3:172564098-172564117	172564114	8	8	sense	NGG	CCTGTGGAAAGGCAGGAAAG	5	RNA2	AD49ZG	RGEN-seq
chr3:173011752-173011771	173011754	46	45	antisense	NGG	TCTGCCCATAAACAGGAAAG	5	RNA2	AD49ZG	RGEN-seq
chr3:175010936-175010955	175010952	24	24	sense	NGG	TCTTCTAGAAGGTTGGAAAG	5	RNA2	AD49ZG	RGEN-seq
chr3:175167151-175167170	175167153	50	50	antisense	NGG	TCTGAAGAAAGACAAGAAAA	5	RNA2	AD49ZG	RGEN-seq
chr3:180064001-180064020	180064017	3	3	sense	NGG	ACTGCTGACAGAGTGGAAAA	4	RNA2	AD49ZG	RGEN-seq
chr3:180453947-180453966	180453949	39	38	antisense	NAG	ACTACTGAAAGAATAGAAAG	4	RNA2	AD49ZG	RGEN-seq
chr3:182556208-182556227	182556224	10	10	sense	NGG	CCTCCAGAAAGAATGGAAAC	5	RNA2	AD49ZG	RGEN-seq
chr3:185077305-185077324	185077321	149	141	sense	NAG	AATGCTGAAAGACTGGAGAG	3	RNA2	AD49ZG	RGEN-seq
chr3:188315560-188315579	188315562	3	3	antisense	NAG	TTTCATTAAAGAATGGAAAG	5	RNA2	AD49ZG	RGEN-seq
chr3:195821073-195821092	195821089	6	6	sense	NAG	TGTTATGAAAGACTGTAAAG	4	RNA2	AD49ZG	RGEN-seq
chr3:197013489-197013508	197013491	263	260	antisense	NGG	CATGCAGGAAGACTGGAAAC	5	RNA2	AD49ZG	RGEN-seq
chr3:197015894-197015913	197015910	4	4	sense	NGG	CCTGCTGAGAGACTGGCTAT	5	RNA2	AD49ZG	RGEN-seq
chr3:201855115-201855134	201855131	15	6	sense	NGG	TCTACTGGGAGACTGGAGAA	5	RNA2	AD49ZG	RGEN-seq
chr3:207486800-207486819	207486816	15	15	sense	NGG	TTTTTAGATAGACTGGAAAG	5	RNA2	AD49ZG	RGEN-seq
chr3:210663607-210663626	210663609	5	5	antisense	NGG	TCTGCTGCTACACAGGAAAG	4	RNA2	AD49ZG	RGEN-seq
chr3:212580037-212580056	212580039	449	444	antisense	NAG	GTTGCTAAAATACTGGAAAG	4	RNA2	AD49ZG	RGEN-seq
chr3:212952549-212952568	212952551	71	71	antisense	NGG	ACTACTGAAAGACTGAAACA	5	RNA2	AD49ZG	RGEN-seq
chr3:217121823-217121842	217121839	318	316	sense	NGG	TCTAATGAAAGACAGGAGAG	4	RNA2	AD49ZG	RGEN-seq
chr3:217448057-217448076	217448073	141	141	sense	NGG	TATGCAGAAAGTCAGGAAAG	4	RNA2	AD49ZG	RGEN-seq
chr3:225542456-225542475	225542458	4	4	antisense	NGG	ATTGGTGAGAGTCTGGAAAG	5	RNA2	AD49ZG	RGEN-seq
chr3:226468568-226468587	226468570	264	263	antisense	NGG	GCTGCAGACAAACTGGAATG	5	RNA2	AD49ZG	RGEN-seq
chr3:227508911-227508930	227508927	297	297	sense	NAG	TACTGTGAAAGACTGAAAAG	5	RNA2	AD49ZG	RGEN-seq
chr3:228081511-228081530	228081527	35	33	sense	NGG	TGATCTGAAAGGATGGAAAG	5	RNA2	AD49ZG	RGEN-seq
chr3:229078736-229078755	229078738	53	53	antisense	NAG	AATGCTGATAAACTGGAAAC	5	RNA2	AD49ZG	RGEN-seq
chr3:232836885-232836904	232836887	6	6	antisense	NGG	TCTGCTGTGGGGCTGGAAAA	5	RNA2	AD49ZG	RGEN-seq
chr3:234651679-234651698	234651695	10	9	sense	NGG	TTTAATGAAAGAATGGACAG	5	RNA2	AD49ZG	RGEN-seq
chr3:237308568-237308587	237308570	135	135	antisense	NGG	TCTTGTGAAAGATTGATAAG	5	RNA2	AD49ZG	RGEN-seq
chr3:238615484-238615503	238615500	4	3	sense	NGG	TTAGCAGAAAGAGTGCAAAG	5	RNA2	AD49ZG	RGEN-seq
chr3:238850228-238850247	238850244	22	22	sense	NGG	TTTGCAGAAAGACTGGGAGT	5	RNA2	AD49ZG	RGEN-seq
chr3:241008607-241008626	241008623	324	320	sense	NGG	AGAGCTGTAAGACTAGAAAG	5	RNA2	AD49ZG	RGEN-seq
chr3:242242480-242242499	242242496	19	19	sense	NGG	CTTGCTGAGGGACAGGAAAG	5	RNA2	AD49ZG	RGEN-seq
chr3:242794730-242794749	242794732	4	4	antisense	NGG	TTTGGGGAAAGAATGAAAAG	5	RNA2	AD49ZG	RGEN-seq
chr3:245122836-245122855	245122852	3	3	sense	NAG	TCTAATTCAAGACTGGAATG	5	RNA2	AD49ZG	RGEN-seq
chr3:245733918-245733937	245733920	107	105	antisense	NGG	TTCTCTGAAAGGCTGGACAG	5	RNA2	AD49ZG	RGEN-seq
chr3:245783002-245783021	245783018	341	339	sense	NGG	ACTGCTGAAAGGATGGAAAG	3	RNA2	AD49ZG	RGEN-seq
chr3:246063888-246063907	246063904	46	46	sense	NGG	GCAGCTGTGAGACTGGACAG	5	RNA2	AD49ZG	RGEN-seq
chr3:247941891-247941910	247941893	4	4	antisense	NGG	TCTAGTCATAGACTGGAAAG	4	RNA2	AD49ZG	RGEN-seq
chr3:249355076-249355095	249355078	184	183	antisense	NGG	GATGCTCTAAGAATGGAAAG	5	RNA2	AD49ZG	RGEN-seq
chr3:250527692-250527711	250527694	5	5	antisense	NAG	AGTGGTGAAAGACTAGACAG	5	RNA2	AD49ZG	RGEN-seq
chr3:250821000-250821019	250821002	293	292	antisense	NGG	TGAACAGAAAGACTGGAAAA	5	RNA2	AD49ZG	RGEN-seq
chr3:257760695-257760714	257760711	13	13	sense	NAG	AATGCTGAAATACTGGCAAG	4	RNA2	AD49ZG	RGEN-seq
chr3:260384173-260384192	260384175	11	5	antisense	NGG	TCCCCTGAAGGACAGGAAAG	4	RNA2	AD49ZG	RGEN-seq
chr3:260769376-260769395	260769378	23	21	antisense	NGG	TTTTATGAAAGACAGAAAAG	5	RNA2	AD49ZG	RGEN-seq
chr3:261210603-261210622	261210605	94	92	antisense	NGG	CCTGAGCAAAGACTGGAAAT	5	RNA2	AD49ZG	RGEN-seq
chr3:263609301-263609320	263609317	175	175	sense	NGG	TCTGCAGGAAGACTGGAAGT	4	RNA2	AD49ZG	RGEN-seq
chr3:263936847-263936866	263936863	403	400	sense	NGG	AATGCTGATAGACTAGAAAC	5	RNA2	AD49ZG	RGEN-seq
chr3:265040735-265040754	265040737	19	18	antisense	NGG	TCTTCTGAAAGAATGGGATG	4	RNA2	AD49ZG	RGEN-seq
chr3:267032509-267032528	267032525	76	67	sense	NGG	ACTGCAGAAAGACTGGATAC	4	RNA2	AD49ZG	RGEN-seq
chr3:267526131-267526150	267526133	3	3	antisense	NAG	CCTGCTAAACTACTAGAAAG	5	RNA2	AD49ZG	RGEN-seq
chr3:269214610-269214629	269214612	9	9	antisense	NGG	TCAGATGGCAGACTGGAAAT	5	RNA2	AD49ZG	RGEN-seq
chr3:273247151-273247170	273247167	265	262	sense	NAG	CTAGCTGGAGGACTGGAAAG	5	RNA2	AD49ZG	RGEN-seq
chr3:273252368-273252387	273252384	18	16	sense	NGG	TTTTCTGAAAGAAAGGAAAA	5	RNA2	AD49ZG	RGEN-seq
chr3:274101324-274101343	274101326	118	118	antisense	NGG	CCTGCTGTAAGAGTGAAAAG	4	RNA2	AD49ZG	RGEN-seq
chr4:120405-120424	120421	32	31	sense	NGG	TGTACAGACAGACTGGAAAT	5	RNA2	AD49ZG	RGEN-seq
chr4:307510-307529	307512	456	451	antisense	NGG	TAAGCTGAAGGTCTGGAAAG	4	RNA2	AD49ZG	RGEN-seq
chr4:1725088-1725107	1725090	7	7	antisense	NAG	TCTGTAACAAGACTAGAAAG	5	RNA2	AD49ZG	RGEN-seq
chr4:4143098-4143117	4143100	160	160	antisense	NGG	ACTGCCGATAGACTGGGGAG	5	RNA2	AD49ZG	RGEN-seq
chr4:6284107-6284126	6284109	221	220	antisense	NAG	CATGCAGAAAGACTGCAAAG	4	RNA2	AD49ZG	RGEN-seq
chr4:6682196-6682215	6682198	19	15	antisense	NGG	TCTAATGAAAGACAGAAAGG	5	RNA2	AD49ZG	RGEN-seq
chr4:11354593-11354612	11354609	35	35	sense	NAG	TCTTCTGGAAAACTGGAAAC	4	RNA2	AD49ZG	RGEN-seq
chr4:17318965-17318984	17318981	81	81	sense	NAG	TCTAATGAAAGACAGAAAAG	4	RNA2	AD49ZG	RGEN-seq
chr4:18403615-18403634	18403617	9	9	antisense	NGG	GCTGTTGAAGGAATGGAATG	5	RNA2	AD49ZG	RGEN-seq
chr4:22998430-22998449	22998446	166	164	sense	NGG	TCATTGGAAAGACTGGAAAC	5	RNA2	AD49ZG	RGEN-seq
chr4:23883676-23883695	23883678	301	299	antisense	NGG	GTTCCTGAAAGACTAGAAAC	5	RNA2	AD49ZG	RGEN-seq
chr4:26083500-26083519	26083516	229	227	sense	NGG	AAGGCTGATAGACTGGAAAG	4	RNA2	AD49ZG	RGEN-seq
chr4:30103587-30103606	30103603	7	7	sense	NAG	GCAGGGGAAAGACTGGCAAG	5	RNA2	AD49ZG	RGEN-seq
chr4:30195960-30195979	30195962	17	15	antisense	NGG	TCTGCAGAAAGATGGGAAAA	4	RNA2	AD49ZG	RGEN-seq
chr4:39901820-39901839	39901822	420	415	antisense	NGG	TCTGATAAATAACTGGAAAA	5	RNA2	AD49ZG	RGEN-seq
chr4:41793800-41793819	41793816	6	6	sense	NGG	GCTGATGAAGCACTGGAGAG	5	RNA2	AD49ZG	RGEN-seq
chr4:46456699-46456718	46456715	12	12	sense	NGG	TTTACTGAAAGACTAGACAT	5	RNA2	AD49ZG	RGEN-seq
chr4:51882549-51882568	51882565	3	3	sense	NGG	TGTGAGGAAAGACTGTTAAG	5	RNA2	AD49ZG	RGEN-seq
chr4:52331738-52331757	52331754	227	226	sense	NGG	TCTGCTTTCTGACTGGAAAG	4	RNA2	AD49ZG	RGEN-seq
chr4:53616792-53616811	53616794	9	9	antisense	NGG	TCTGCTGGATAACTGAAAAA	5	RNA2	AD49ZG	RGEN-seq
chr4:54267791-54267810	54267807	8	8	sense	NGG	ACAGCTGAAAGAGTGGAAGT	5	RNA2	AD49ZG	RGEN-seq
chr4:60848020-60848039	60848022	21	21	antisense	NGG	TCAACTGAAACACTGGACAT	5	RNA2	AD49ZG	RGEN-seq
chr4:61051967-61051986	61051983	336	336	sense	NAG	TCTGTGGAAAGACTGGGAAG	3	RNA2	AD49ZG	RGEN-seq
chr4:61213533-61213552	61213549	18	17	sense	NAG	AGTACTAAAAGAATGGAAAG	5	RNA2	AD49ZG	RGEN-seq
chr4:61832568-61832587	61832570	246	243	antisense	NGG	CTAGCTGCAACACTGGAAAG	5	RNA2	AD49ZG	RGEN-seq
chr4:63204909-63204928	63204911	189	188	antisense	NAG	AATGCTGTAAGACAGGAAAG	4	RNA2	AD49ZG	RGEN-seq
chr4:67729732-67729751	67729734	100	100	antisense	NAG	TGAACAAAAAGACTGGAAAG	5	RNA2	AD49ZG	RGEN-seq
chr4:67862519-67862538	67862535	28	26	sense	NAG	ACTTGGTAAAGACTGGAAAG	5	RNA2	AD49ZG	RGEN-seq
chr4:70998995-70999014	70998997	60	60	antisense	NAG	TCTGCAATAAGCCTGGAAAG	4	RNA2	AD49ZG	RGEN-seq
chr4:72759455-72759474	72759471	305	304	sense	NGG	CCTGCTTAAAGACAGGAGAG	4	RNA2	AD49ZG	RGEN-seq
chr4:76131741-76131760	76131743	286	157	antisense	NGG	GATTTTGAAAGACAGGAAAG	5	RNA2	AD49ZG	RGEN-seq
chr4:79710397-79710416	79710399	3	3	antisense	NGG	TCATCTGAAAGACTGGCATT	5	RNA2	AD49ZG	RGEN-seq
chr4:80388531-80388550	80388547	32	32	sense	NAG	ACTTCTGAAAGACTGGTTAG	4	RNA2	AD49ZG	RGEN-seq
chr4:82162934-82162953	82162936	57	49	antisense	NGG	CCTGCTGGAAGACTGTGAAA	5	RNA2	AD49ZG	RGEN-seq
chr4:83606225-83606244	83606241	273	272	sense	NGG	GCTGCAGGAAGACTGGAGTG	5	RNA2	AD49ZG	RGEN-seq
chr4:83795720-83795739	83795736	4	4	sense	NGG	TCTGCTAGAAATCTGGTAAG	5	RNA2	AD49ZG	RGEN-seq
chr4:84248982-84249001	84248984	71	70	antisense	NGG	TCTTCCAAAAGACTAGAAGG	5	RNA2	AD49ZG	RGEN-seq
chr4:85245675-85245694	85245677	3	3	antisense	NGG	TGTGGTGAATGACTGGGAAG	4	RNA2	AD49ZG	RGEN-seq
chr4:86452838-86452857	86452854	4	4	sense	NAG	TCTAGGCAAAAACTGGAAAG	5	RNA2	AD49ZG	RGEN-seq
chr4:88341548-88341567	88341550	22	21	antisense	NGG	TCTCTATAAAAACTGGAAAG	5	RNA2	AD49ZG	RGEN-seq
chr4:90295041-90295060	90295043	67	67	antisense	NGG	TCTGCATAGGGGCTGGAAAG	5	RNA2	AD49ZG	RGEN-seq
chr4:92541278-92541297	92541280	55	55	antisense	NGG	CCTACTCAAAGCTTGGAAAG	5	RNA2	AD49ZG	RGEN-seq
chr4:93298275-93298294	93298291	4	3	sense	NAG	ATTATTGAAAGTCTGGAAAG	5	RNA2	AD49ZG	RGEN-seq
chr4:93833220-93833239	93833236	3	3	sense	NGG	TATGTTTAAAGACTGGGAGG	5	RNA2	AD49ZG	RGEN-seq
chr4:93858212-93858231	93858228	133	130	sense	NGG	CTTGCTGAAGGACTGGATAA	5	RNA2	AD49ZG	RGEN-seq
chr4:100140214-100140233	100140216	8	7	antisense	NGG	GCAGGAGGAAGACTGGAAAG	5	RNA2	AD49ZG	RGEN-seq
chr4:104944212-104944231	104944214	31	31	antisense	NGG	TCTGGCAAAGGATTGGAAAG	5	RNA2	AD49ZG	RGEN-seq
chr4:109914687-109914706	109914703	20	20	sense	NAG	TCTAATGAAAGACTGAAAGG	4	RNA2	AD49ZG	RGEN-seq
chr4:114129497-114129516	114129499	241	239	antisense	NAG	AATACATAAAGACTGGAAAG	5	RNA2	AD49ZG	RGEN-seq
chr4:117293376-117293395	117293392	174	173	sense	NGG	TATGCTTAAAAGCTGAAAAG	5	RNA2	AD49ZG	RGEN-seq
chr4:126112408-126112427	126112424	4	3	sense	NAG	TTTCATTAAAGACTGGAAAT	5	RNA2	AD49ZG	RGEN-seq
chr4:127987286-127987305	127987302	10	10	sense	NGG	TCTCTGCAAAGACTTGAAAG	5	RNA2	AD49ZG	RGEN-seq
chr4:128180719-128180738	128180735	349	343	sense	NGG	CATGCTGAAAGACCAGAAAG	4	RNA2	AD49ZG	RGEN-seq
chr4:128836425-128836444	128836441	5	4	sense	NGG	ACAGCTGAAGGACTGGAGAC	5	RNA2	AD49ZG	RGEN-seq
chr4:129514458-129514477	129514460	7	7	antisense	NGG	TTTACTGAGTGCCTGGAAAG	5	RNA2	AD49ZG	RGEN-seq
chr4:132252588-132252607	132252604	297	295	sense	NAG	AGGGCTGAAAGACTAGAAAG	4	RNA2	AD49ZG	RGEN-seq
chr4:135125739-135125758	135125741	165	165	antisense	NGG	TGAGCTGAAACACAGGAAAG	4	RNA2	AD49ZG	RGEN-seq
chr4:140820123-140820142	140820125	15	15	antisense	NAG	CCTACTGAAAGACAGGAAAT	4	RNA2	AD49ZG	RGEN-seq
chr4:143268079-143268098	143268081	76	76	antisense	NGG	TAGACAGAAAGAGTGGAAAG	5	RNA2	AD49ZG	RGEN-seq
chr4:146640835-146640854	146640851	18	17	sense	NGG	TCTGTGAAAAGACTGGGATG	5	RNA2	AD49ZG	RGEN-seq
chr4:148751243-148751262	148751259	3	3	sense	NAG	ACTGGTGAAAGACTAGGTAG	5	RNA2	AD49ZG	RGEN-seq
chr4:151695951-151695970	151695967	14	14	sense	NAG	TCAGAGTAAAGACTAGAAAG	5	RNA2	AD49ZG	RGEN-seq
chr4:155346814-155346833	155346830	61	61	sense	NAG	ACTGCAGAGGGACTGGAAAG	4	RNA2	AD49ZG	RGEN-seq
chr4:155587692-155587711	155587694	9	9	antisense	NAG	ACAGCTGAGAGAATGGAATG	5	RNA2	AD49ZG	RGEN-seq
chr4:160744005-160744024	160744021	17	17	sense	NGG	TCTGAAGAAGGACTGGAGAA	5	RNA2	AD49ZG	RGEN-seq
chr4:162543383-162543402	162543399	276	274	sense	NGG	GCTACTGAAATATTAGAAAG	5	RNA2	AD49ZG	RGEN-seq
chr4:163970412-163970431	163970428	9	9	sense	NGG	TCTAAGGAAAGACAGGGAAG	5	RNA2	AD49ZG	RGEN-seq
chr4:165780004-165780023	165780006	10	10	antisense	NGG	CCTGCGGAAGGACTAGATAG	5	RNA2	AD49ZG	RGEN-seq
chr4:167354838-167354857	167354854	42	42	sense	NGG	TGAGCTGAAAGCCTGTAAAG	4	RNA2	AD49ZG	RGEN-seq
chr4:168146782-168146801	168146784	3	3	antisense	NGG	TTTCCTGGAAGACTGGGATG	5	RNA2	AD49ZG	RGEN-seq
chr4:168830996-168831015	168831012	91	91	sense	NGG	ACTGCTGCTGGACTGGTAAG	5	RNA2	AD49ZG	RGEN-seq
chr4:174352315-174352334	174352331	3	3	sense	NAG	TATGTGGAAAAACTGGAAAT	5	RNA2	AD49ZG	RGEN-seq
chr4:177471842-177471861	177471844	8	8	antisense	NGG	CCTACTGGAAGACTGGCAGG	5	RNA2	AD49ZG	RGEN-seq
chr4:177509747-177509766	177509749	10	9	antisense	NAG	TCAGCAGATAGACTGGAAAA	4	RNA2	AD49ZG	RGEN-seq
chr4:178568538-178568557	178568540	10	10	antisense	NGG	TCAGAAGGAAGACAGGAAAG	5	RNA2	AD49ZG	RGEN-seq
chr4:179563244-179563263	179563246	12	12	antisense	NGG	TCAGCTGTAAAAATGGAAAA	5	RNA2	AD49ZG	RGEN-seq
chr4:180789503-180789522	180789519	212	211	sense	NGG	TTGGCTGAAGGACTGGGAAG	4	RNA2	AD49ZG	RGEN-seq
chr4:181524396-181524415	181524412	159	158	sense	NAG	TCTGCACAGAAACTGGAAAG	4	RNA2	AD49ZG	RGEN-seq
chr4:183782628-183782647	183782644	281	278	sense	NAG	TTCTCTAAAAGACTGAAAAG	5	RNA2	AD49ZG	RGEN-seq
chr4:183932899-183932918	183932901	133	133	antisense	NGG	TCTGACAAAAGACTGGTGAG	5	RNA2	AD49ZG	RGEN-seq
chr4:184372102-184372121	184372104	223	222	antisense	NGG	TCTGATATAAAACTGGAAAC	5	RNA2	AD49ZG	RGEN-seq
chr4:184846815-184846834	184846817	149	146	antisense	NGG	TCACATGAAAGACTGGATTG	5	RNA2	AD49ZG	RGEN-seq
chr4:185730315-185730334	185730331	31	31	sense	NAG	GCTGCTAAAATACTGATAAG	5	RNA2	AD49ZG	RGEN-seq
chr4:189869732-189869751	189869734	21	21	antisense	NGG	CCTGCTCAAATACTGAAGAG	5	RNA2	AD49ZG	RGEN-seq
chr4:189993963-189993982	189993979	228	225	sense	NGG	ATTGCTGACAGACTGGAAGA	5	RNA2	AD49ZG	RGEN-seq
chr4:191782506-191782525	191782522	3	3	sense	NGG	TCTGCTTATAGACTGTCCAG	5	RNA2	AD49ZG	RGEN-seq
chr4:196484145-196484164	196484147	59	59	antisense	NAG	TATGGAGAAAGAATGGAAAG	4	RNA2	AD49ZG	RGEN-seq
chr4:197432057-197432076	197432073	44	44	sense	NGG	TTTCATGAAATACTGGAAAA	5	RNA2	AD49ZG	RGEN-seq
chr4:197614418-197614437	197614420	17	12	antisense	NGG	TTTGCTCAAAGATTGGGAAA	5	RNA2	AD49ZG	RGEN-seq
chr4:198009494-198009513	198009510	5	5	sense	NAG	CCTGCCGAAGAACTAGAAAG	5	RNA2	AD49ZG	RGEN-seq
chr4:199490635-199490654	199490651	35	35	sense	NAG	TTGTCTGAAAGATTGGAAAT	5	RNA2	AD49ZG	RGEN-seq
chr4:199876529-199876548	199876531	7	7	antisense	NGG	CCTGCTGAAAGTCTGAATTG	5	RNA2	AD49ZG	RGEN-seq
chr4:201105341-201105360	201105357	292	292	sense	NGG	TCTACTGAGAGACAGAAAAG	4	RNA2	AD49ZG	RGEN-seq
chr4:201975932-201975951	201975948	49	49	sense	NGG	TCAACTGAGAGACTCAAAAG	5	RNA2	AD49ZG	RGEN-seq
chr4:202799861-202799880	202799877	183	178	sense	NAG	TGTGCAGAAAGACAGGAAAT	4	RNA2	AD49ZG	RGEN-seq
chr4:202902978-202902997	202902980	5	5	antisense	NGG	TGTACTGAAAGACTGGTAGA	5	RNA2	AD49ZG	RGEN-seq
chr4:213570008-213570027	213570010	26	25	antisense	NAG	TCAGGACAAAGACTGGAAAG	4	RNA2	AD49ZG	RGEN-seq
chr4:216787549-216787568	216787551	14	13	antisense	NGG	GCTGCTGAGAGATTGGATTG	5	RNA2	AD49ZG	RGEN-seq
chr4:218320220-218320239	218320222	220	215	antisense	NGG	TTTCCTGAAAGACTGGATAT	4	RNA2	AD49ZG	RGEN-seq
chr4:223465450-223465469	223465466	19	19	sense	NAG	TTTGATAACAGACTGGAAAG	4	RNA2	AD49ZG	RGEN-seq
chr4:223634427-223634446	223634443	4	4	sense	NAG	AATGCTGCAAGACTAGAACG	5	RNA2	AD49ZG	RGEN-seq
chr4:224845591-224845610	224845593	143	143	antisense	NAG	ACCTGTGAAAGACTGGCAAG	5	RNA2	AD49ZG	RGEN-seq
chr4:226949114-226949133	226949130	9	9	sense	NGG	GCTGCTGTGAGACTGGAGAC	5	RNA2	AD49ZG	RGEN-seq
chr5:2141605-2141624	2141621	121	119	sense	NGG	TGGGCAGAAAGACTGGACAA	5	RNA2	AD49ZG	RGEN-seq
chr5:3344490-3344509	3344506	82	82	sense	NGG	TTTGCTGTAAGATTTGAGAG	5	RNA2	AD49ZG	RGEN-seq
chr5:4233219-4233238	4233221	16	14	antisense	NAG	TTGACTGAAAGAGTGGAAAG	4	RNA2	AD49ZG	RGEN-seq
chr5:5836609-5836628	5836625	5	5	sense	NGG	TCTGCAGAAAGGCTAGACAG	4	RNA2	AD49ZG	RGEN-seq
chr5:6242117-6242136	6242133	15	15	sense	NGG	GATGCTGAGAGCCTGGAAAC	5	RNA2	AD49ZG	RGEN-seq
chr5:9621516-9621535	9621532	37	37	sense	NAG	TCTTCTGAAAGACTGAAAAT	3	RNA2	AD49ZG	RGEN-seq
chr5:11221907-11221926	11221923	7	7	sense	NGG	TCCTGTGAAAGACAGGACAG	5	RNA2	AD49ZG	RGEN-seq
chr5:13784829-13784848	13784845	11	11	sense	NGG	TTTGCTAAAAGAAGGAAAAG	5	RNA2	AD49ZG	RGEN-seq
chr5:13829077-13829096	13829093	361	357	sense	NGG	GCAGCTGAAATACTAGAAAG	4	RNA2	AD49ZG	RGEN-seq
chr5:13900546-13900565	13900562	168	167	sense	NAG	GATGCAAAAACACTGGAAAG	5	RNA2	AD49ZG	RGEN-seq
chr5:17459932-17459951	17459934	7	7	antisense	NGG	TCATCTGAAAAACAGAAAAG	5	RNA2	AD49ZG	RGEN-seq
chr5:22650264-22650283	22650280	12	12	sense	NAG	GATGGAGAAAGACTGGCAAG	5	RNA2	AD49ZG	RGEN-seq
chr5:31064859-31064878	31064875	71	70	sense	NGG	GTTGCTGCAAGGCTGGAAAC	5	RNA2	AD49ZG	RGEN-seq
chr5:32713629-32713648	32713645	28	27	sense	NAG	CAGGCTGAAGGACTGGACAG	5	RNA2	AD49ZG	RGEN-seq
chr5:34012719-34012738	34012721	34	34	antisense	NGG	TAAGCTGAACATCTGGAAAG	5	RNA2	AD49ZG	RGEN-seq
chr5:34079356-34079375	34079358	109	105	antisense	NAG	TGCTCTGAAAGAATGGAAAG	4	RNA2	AD49ZG	RGEN-seq
chr5:36684326-36684345	36684342	97	97	sense	NGG	AAAGCTGAAAGACTGGAGAA	5	RNA2	AD49ZG	RGEN-seq
chr5:40591759-40591778	40591761	10	10	antisense	NGG	ACTTCTGAAAGACTGGATGA	5	RNA2	AD49ZG	RGEN-seq
chr5:40991145-40991164	40991161	20	20	sense	NGG	CATGCTGAAAGACAGGAACT	5	RNA2	AD49ZG	RGEN-seq
chr5:42559278-42559297	42559294	255	255	sense	NAG	AATGCTAAAAAACTAGAAAG	5	RNA2	AD49ZG	RGEN-seq
chr5:42802233-42802252	42802249	7	7	sense	NGG	TCAGCTGACAGACAGGAAAC	4	RNA2	AD49ZG	RGEN-seq
chr5:42826339-42826358	42826355	32	32	sense	NGG	TTTGCAGAAAGACTGGGAGT	5	RNA2	AD49ZG	RGEN-seq
chr5:47524956-47524975	47524972	43	43	sense	NGG	TCGGCTGCATGATTGGAAAG	4	RNA2	AD49ZG	RGEN-seq
chr5:47534308-47534327	47534310	184	183	antisense	NGG	TCTGTTGAAAGAATGAAATG	4	RNA2	AD49ZG	RGEN-seq
chr5:58708243-58708262	58708245	7	7	antisense	NAG	TCTTTTGTGAGACTGGAAAG	4	RNA2	AD49ZG	RGEN-seq
chr5:58858193-58858212	58858209	40	40	sense	NGG	TCTAGTGAAAGAATGAAAAA	5	RNA2	AD49ZG	RGEN-seq
chr5:60057262-60057281	60057264	13	13	antisense	NAG	TTTGCAGACAGACTGGAAGT	5	RNA2	AD49ZG	RGEN-seq
chr5:61199941-61199960	61199943	261	259	antisense	NGG	TCTGCAGAAAGACTTAAAAG	3	RNA2	AD49ZG	RGEN-seq
chr5:65586181-65586200	65586197	234	233	sense	NAG	TAAGCTGATAGACTGGAAAA	4	RNA2	AD49ZG	RGEN-seq
chr5:69281901-69281920	69281917	9	9	sense	NAG	TCTGCTGTTAGACTGGCTAG	4	RNA2	AD49ZG	RGEN-seq
chr5:73434330-73434349	73434346	17	17	sense	NGG	TCTAATGAGAGACAGAAAAG	5	RNA2	AD49ZG	RGEN-seq
chr5:75209538-75209557	75209540	11	11	antisense	NAG	AAAGCTGGAAGACTTGAAAG	5	RNA2	AD49ZG	RGEN-seq
chr5:76869098-76869117	76869114	242	242	sense	NGG	ACTGGTGAAAGACTATAAAA	5	RNA2	AD49ZG	RGEN-seq
chr5:78184537-78184556	78184553	48	47	sense	NGG	GAGGCTGGAAGACTGTAAAG	5	RNA2	AD49ZG	RGEN-seq
chr5:79275661-79275680	79275663	38	37	antisense	NGG	TGCACTGAAAGCCTGGAAAC	5	RNA2	AD49ZG	RGEN-seq
chr5:80311439-80311458	80311441	4	4	antisense	NAG	ACTGGTGGAGGACTGGAAAG	4	RNA2	AD49ZG	RGEN-seq
chr5:82147488-82147507	82147504	60	60	sense	NGG	ACTGCTTACTAACTGGAAAG	5	RNA2	AD49ZG	RGEN-seq
chr5:91942510-91942529	91942526	4	4	sense	NGG	TATCCTCAGAGACTGGAAAT	5	RNA2	AD49ZG	RGEN-seq
chr5:93443118-93443137	93443134	8	6	sense	NGG	AGTGCTGAAAGACATGAAAT	5	RNA2	AD49ZG	RGEN-seq
chr5:96817066-96817085	96817082	408	403	sense	NGG	ATTACTGAAAGCCTGGAAAG	4	RNA2	AD49ZG	RGEN-seq
chr5:99309265-99309284	99309267	12	12	antisense	NGG	TCTTCAGAAAGAATGAAAAT	5	RNA2	AD49ZG	RGEN-seq
chr5:100351145-100351164	100351147	53	53	antisense	NAG	TTAAATGAAAGATTGGAAAG	5	RNA2	AD49ZG	RGEN-seq
chr5:101607465-101607484	101607467	261	257	antisense	NGG	ACTGCATATAGACTGGAAAT	5	RNA2	AD49ZG	RGEN-seq
chr5:106744747-106744766	106744763	4	4	sense	NAG	CCTGAAGAAAGGATGGAAAG	5	RNA2	AD49ZG	RGEN-seq
chr5:107817011-107817030	107817027	4	4	sense	NAG	GCTGCCAAAAGGCTGGATAG	5	RNA2	AD49ZG	RGEN-seq
chr5:111152750-111152769	111152766	7	7	sense	NAG	TCTCTTAAAAGACTGGGAAG	4	RNA2	AD49ZG	RGEN-seq
chr5:113101283-113101302	113101285	104	103	antisense	NGG	GCAGATGAAAGACAGGAGAG	5	RNA2	AD49ZG	RGEN-seq
chr5:120549342-120549361	120549344	10	10	antisense	NGG	TGTTCTGAAAGATTTAAAAG	5	RNA2	AD49ZG	RGEN-seq
chr5:127070372-127070391	127070374	265	261	antisense	NAG	TCTACAGAAACACTGGAAAA	4	RNA2	AD49ZG	RGEN-seq
chr5:131642117-131642136	131642119	208	208	antisense	NGG	GCAGCTGAAAGACTGGGAAA	4	RNA2	AD49ZG	RGEN-seq
chr5:132323108-132323127	132323124	7	7	sense	NGG	TCTACAGAAAGACTGTAGTG	5	RNA2	AD49ZG	RGEN-seq
chr5:139005603-139005622	139005605	90	90	antisense	NAG	TAGTATGAAAGACTTGAAAG	5	RNA2	AD49ZG	RGEN-seq
chr5:141866936-141866955	141866938	6	6	antisense	NGG	ACTCCAGAATTACTGGAAAG	5	RNA2	AD49ZG	RGEN-seq
chr5:145747667-145747686	145747669	18	18	antisense	NGG	TAGGTTGAAAACCTGGAAAG	5	RNA2	AD49ZG	RGEN-seq
chr5:147761850-147761869	147761852	7	7	antisense	NGG	TCTAGTGAGAGACAGAAAAG	5	RNA2	AD49ZG	RGEN-seq
chr5:150232330-150232349	150232346	8	8	sense	NGG	TCGGGTGAAAGACTGACCAG	5	RNA2	AD49ZG	RGEN-seq
chr5:151328244-151328263	151328260	86	85	sense	NAG	GAAGATGAAAGAATGGAAAG	5	RNA2	AD49ZG	RGEN-seq
chr5:151443834-151443853	151443836	258	256	antisense	NAG	TCACCAGAAAGACTAGAAAG	4	RNA2	AD49ZG	RGEN-seq
chr5:152182765-152182784	152182781	9	9	sense	NGG	TCTGCCAAAAGTCTATAAAG	5	RNA2	AD49ZG	RGEN-seq
chr5:156242157-156242176	156242173	11	11	sense	NGG	TGTCAAGAAAGAGTGGAAAG	5	RNA2	AD49ZG	RGEN-seq
chr5:164276826-164276845	164276828	207	207	antisense	NAG	CCAGCTGAGAGACTGGCAAA	5	RNA2	AD49ZG	RGEN-seq
chr5:166972356-166972375	166972358	14	14	antisense	NAG	TCTAATGAGAGACAGGAAAG	4	RNA2	AD49ZG	RGEN-seq
chr5:168396558-168396577	168396574	4	4	sense	NGG	TCTGATCAAAGAATGGAAAT	4	RNA2	AD49ZG	RGEN-seq
chr5:170456141-170456160	170456143	204	201	antisense	NGG	TCCTCTGAGAGACTGGAGAG	4	RNA2	AD49ZG	RGEN-seq
chr5:173493393-173493412	173493395	4	4	antisense	NGG	TCTGCTGATAGACTGATCTG	5	RNA2	AD49ZG	RGEN-seq
chr5:182328064-182328083	182328080	5	5	sense	NAG	TTTTCTGAAAGGCTAGAAAG	4	RNA2	AD49ZG	RGEN-seq
chr5:183811983-183812002	183811985	97	95	antisense	NGG	CCAGCTGAAAGGCTGGTGAG	5	RNA2	AD49ZG	RGEN-seq
chr5:187292284-187292303	187292286	275	273	antisense	NAG	TCTACCTAAAGACAGGAAAG	4	RNA2	AD49ZG	RGEN-seq
chr5:191228068-191228087	191228084	135	134	sense	NAG	TACACTGACAGACTGGAAAA	5	RNA2	AD49ZG	RGEN-seq
chr5:192635673-192635692	192635675	4	4	antisense	NGG	TGTGCATAAGGACTGGAAAT	5	RNA2	AD49ZG	RGEN-seq
chr5:194101307-194101326	194101309	6	4	antisense	NAG	TCTTCGGAAAGACTTGAAAG	3	RNA2	AD49ZG	RGEN-seq
chr5:194708898-194708917	194708900	5	5	antisense	NAG	TACACTGAAAGATTGGAGAG	5	RNA2	AD49ZG	RGEN-seq
chr5:194785959-194785978	194785961	24	24	antisense	NGG	TCTGCAGAATAACTGGGAAA	5	RNA2	AD49ZG	RGEN-seq
chr5:195331859-195331878	195331875	7	7	sense	NGG	ACTAATGACACACTGGAAAG	5	RNA2	AD49ZG	RGEN-seq
chr5:195797277-195797296	195797293	41	41	sense	NGG	TCTAATGAGAGACAGAAAAG	5	RNA2	AD49ZG	RGEN-seq
chr5:198012382-198012401	198012398	46	43	sense	NGG	TCTGCTAATAGACTATAAAA	5	RNA2	AD49ZG	RGEN-seq
chr5:200670858-200670877	200670860	5	5	antisense	NGG	ACAGCTGAAAGCCAGGAGAG	5	RNA2	AD49ZG	RGEN-seq
chr5:201771261-201771280	201771277	6	6	sense	NGG	GCTCCTAACAGACTGTAAAG	5	RNA2	AD49ZG	RGEN-seq
chr5:202851085-202851104	202851087	76	76	antisense	NGG	GCTGCCCAATGACTAGAAAG	5	RNA2	AD49ZG	RGEN-seq
chr5:203124990-203125009	203124992	4	4	antisense	NGG	TCTAGTGAAAGAAAGGAAAT	5	RNA2	AD49ZG	RGEN-seq
chr5:203126089-203126108	203126091	31	31	antisense	NGG	TCTAATGAGAGACAGAAAAG	5	RNA2	AD49ZG	RGEN-seq
chr5:206343093-206343112	206343095	5	5	antisense	NGG	TCTGCTGGAAGAATAAAAAG	4	RNA2	AD49ZG	RGEN-seq
chr5:207484504-207484523	207484506	3	3	antisense	NAG	TGTGCTGACAGACAGGAAAT	4	RNA2	AD49ZG	RGEN-seq
chr5:208500069-208500088	208500085	9	9	sense	NAG	ACAGCAAAAACACTGGAAAG	5	RNA2	AD49ZG	RGEN-seq
chr5:214868277-214868296	214868279	86	84	antisense	NGG	AATGCTGAAAGACCAGAGAG	5	RNA2	AD49ZG	RGEN-seq
chr5:215475971-215475990	215475973	215	214	antisense	NAG	GTTGTTAAAAGACTGAAAAG	5	RNA2	AD49ZG	RGEN-seq
chr6:1775404-1775423	1775406	71	70	antisense	NGG	CCTGAGGAAAGACTTGAATG	5	RNA2	AD49ZG	RGEN-seq
chr6:7153846-7153865	7153848	13	13	antisense	NAG	TCTTATGAAAAACTAAAAAG	5	RNA2	AD49ZG	RGEN-seq
chr6:7556627-7556646	7556629	56	56	antisense	NGG	ACAGCTGATAAACTGTAAAG	5	RNA2	AD49ZG	RGEN-seq
chr6:8384372-8384391	8384388	276	272	sense	NGG	CATGCTCAAAGCATGGAAAG	5	RNA2	AD49ZG	RGEN-seq
chr6:12545526-12545545	12545528	28	28	antisense	NGG	TTTGTGGAAAGACAAGAAAG	5	RNA2	AD49ZG	RGEN-seq
chr6:13117960-13117979	13117962	86	86	antisense	NGG	ATTTCTTAAAGACTGGAAAC	5	RNA2	AD49ZG	RGEN-seq
chr6:13411883-13411902	13411885	62	62	antisense	NGG	TAAGGTAAAAGAATGGAAAG	5	RNA2	AD49ZG	RGEN-seq
chr6:14612723-14612742	14612725	176	174	antisense	NAG	TCCATTGAAAGACTGGAATG	4	RNA2	AD49ZG	RGEN-seq
chr6:14954133-14954152	14954135	11	11	antisense	NGG	GCAGCTGACAGACTGGGAAA	5	RNA2	AD49ZG	RGEN-seq
chr6:15210325-15210344	15210341	8	8	sense	NAG	TCTGAAGAAACACTGAAAAA	5	RNA2	AD49ZG	RGEN-seq
chr6:21048199-21048218	21048201	239	235	antisense	NAG	TTTCCTGTAAGACTGGAAAG	3	RNA2	AD49ZG	RGEN-seq
chr6:22038732-22038751	22038748	10	10	sense	NGG	TCTACTGACTGACTAGAGAG	5	RNA2	AD49ZG	RGEN-seq
chr6:23787892-23787911	23787908	11	11	sense	NAG	TCTTCTAGAAAACTGAAAAG	5	RNA2	AD49ZG	RGEN-seq
chr6:26563918-26563937	26563920	9	9	antisense	NGG	CCTGCTGAAAGCCAGAAAAA	5	RNA2	AD49ZG	RGEN-seq
chr6:27989000-27989019	27989016	7	7	sense	NAG	ACTGCTGAGAGAATGGAAAT	4	RNA2	AD49ZG	RGEN-seq
chr6:28039056-28039075	28039072	7	7	sense	NGG	ACTGCAGAAGGACAGGAATG	5	RNA2	AD49ZG	RGEN-seq
chr6:30729155-30729174	30729171	33	33	sense	NGG	GATGCTGATAGACTTGAAAT	5	RNA2	AD49ZG	RGEN-seq
chr6:32140952-32140971	32140968	334	331	sense	NGG	CAGGCAGAAAGAATGGAAAG	5	RNA2	AD49ZG	RGEN-seq
chr6:34663410-34663429	34663412	32	32	antisense	NAG	TATTCTGCAAGACTGAAAAG	4	RNA2	AD49ZG	RGEN-seq
chr6:35173946-35173965	35173962	27	27	sense	NGG	TTTGCTCAAAGAATGGACAG	4	RNA2	AD49ZG	RGEN-seq
chr6:35525360-35525379	35525362	14	13	antisense	NGG	TCTAATGAAAGACAGAAAGG	5	RNA2	AD49ZG	RGEN-seq
chr6:35789053-35789072	35789069	202	202	sense	NGG	ATTGATGAAAGACAGGGAAG	5	RNA2	AD49ZG	RGEN-seq
chr6:37684858-37684877	37684860	6	6	antisense	NAG	TATCTTCTAAGACTGGAAAG	5	RNA2	AD49ZG	RGEN-seq
chr6:39156756-39156775	39156772	11	11	sense	NAG	ACTAGTGAAAGACTGACAAG	5	RNA2	AD49ZG	RGEN-seq
chr6:39699032-39699051	39699048	29	29	sense	NGG	TGTTCTGGAAGACTGGACTG	5	RNA2	AD49ZG	RGEN-seq
chr6:40942161-40942180	40942163	314	311	antisense	NGG	TAAACTGAAAGACAGGAAAG	4	RNA2	AD49ZG	RGEN-seq
chr6:42568034-42568053	42568050	10	10	sense	NGG	TGATCTGTAAGACAGGAAAG	5	RNA2	AD49ZG	RGEN-seq
chr6:43140035-43140054	43140037	549	548	antisense	NAG	GTTGCAGAAAGACTGGTAAG	4	RNA2	AD49ZG	RGEN-seq
chr6:43615075-43615094	43615091	28	28	sense	NGG	TCTGCTAACAGACTGGAAGC	4	RNA2	AD49ZG	RGEN-seq
chr6:43853692-43853711	43853708	61	61	sense	NAG	TGGGAGGAAAGACTGGAATG	5	RNA2	AD49ZG	RGEN-seq
chr6:44601291-44601310	44601293	381	380	antisense	NGG	CCTGGGGAAAGACTGACAAG	5	RNA2	AD49ZG	RGEN-seq
chr6:47350035-47350054	47350037	283	279	antisense	NAG	AGAGCTGCAAGATTGGAAAG	5	RNA2	AD49ZG	RGEN-seq
chr6:52397324-52397343	52397326	109	109	antisense	NGG	TCTGTTTTAAAACTGGAAAT	5	RNA2	AD49ZG	RGEN-seq
chr6:52759011-52759030	52759027	346	342	sense	NGG	GCTAGAGAAAGACTGGAAAA	5	RNA2	AD49ZG	RGEN-seq
chr6:53828432-53828451	53828434	256	253	antisense	NGG	GCAGCTGAAAAACAAGAAAG	5	RNA2	AD49ZG	RGEN-seq
chr6:54173409-54173428	54173411	3	3	antisense	NAG	TATACTGAAAAACAGAAAAG	5	RNA2	AD49ZG	RGEN-seq
chr6:57537732-57537751	57537748	193	190	sense	NGG	GCTGCTGAGAGACTGGATTG	4	RNA2	AD49ZG	RGEN-seq
chr6:58366490-58366509	58366492	21	21	antisense	NGG	TCTACTAAAACACTGGACAA	5	RNA2	AD49ZG	RGEN-seq
chr6:59932473-59932492	59932489	3	3	sense	NAG	GGTGGAGAAAGACAGGAAAG	5	RNA2	AD49ZG	RGEN-seq
chr6:60336983-60337002	60336985	4	4	antisense	NGG	TCTGTTTAAAAAATGAAAAG	5	RNA2	AD49ZG	RGEN-seq
chr6:62178366-62178385	62178382	105	105	sense	NGG	TCTATTTAAAGACTGGGAAT	5	RNA2	AD49ZG	RGEN-seq
chr6:62439880-62439899	62439896	359	358	sense	NGG	CATGCTGAAATACTGAAATG	5	RNA2	AD49ZG	RGEN-seq
chr6:63199929-63199948	63199945	6	6	sense	NGG	TCTGTTGAAAGACTAGGAGA	5	RNA2	AD49ZG	RGEN-seq
chr6:64523724-64523743	64523740	73	73	sense	NGG	TTTACTGAAAACATGGAAAG	5	RNA2	AD49ZG	RGEN-seq
chr6:74539972-74539991	74539988	3	3	sense	NAG	ACAGCTGAAAGATTACAAAG	5	RNA2	AD49ZG	RGEN-seq
chr6:74886464-74886483	74886466	7	6	antisense	NGG	TCTGCTCAGCAATTGGAAAG	5	RNA2	AD49ZG	RGEN-seq
chr6:80021656-80021675	80021658	315	314	antisense	NGG	TAGGCTGGAAAACTGGCAAG	5	RNA2	AD49ZG	RGEN-seq
chr6:80697351-80697370	80697367	38	30	sense	NAG	TTGGCTGAAGGACTGGATAT	5	RNA2	AD49ZG	RGEN-seq
chr6:81126957-81126976	81126973	26	26	sense	NAG	TCAGCTGATAGATTGGTAAG	4	RNA2	AD49ZG	RGEN-seq
chr6:84096036-84096055	84096052	407	401	sense	NGG	CATGCAGAAAGACTGGAGAG	4	RNA2	AD49ZG	RGEN-seq
chr6:84616108-84616127	84616124	159	158	sense	NGG	TCTGCTCTGAGACTGGGAAG	4	RNA2	AD49ZG	RGEN-seq
chr6:85031092-85031111	85031108	7	7	sense	NGG	TGTGTTCTAAGACTGGACAG	5	RNA2	AD49ZG	RGEN-seq
chr6:85274959-85274978	85274975	5	5	sense	NAG	GCATCTGGAAGAATGGAAAG	5	RNA2	AD49ZG	RGEN-seq
chr6:88568486-88568505	88568488	17	17	antisense	NAG	CCTCCTGAAAGCATGGAAAG	4	RNA2	AD49ZG	RGEN-seq
chr6:88651934-88651953	88651950	180	178	sense	NGG	TAAATAGAAAGACTGGAAAG	5	RNA2	AD49ZG	RGEN-seq
chr6:89182428-89182447	89182444	4	4	sense	NGG	TCTACTGCCAGCCTGGAAAA	5	RNA2	AD49ZG	RGEN-seq
chr6:89281365-89281384	89281381	127	127	sense	NGG	GCTACTAAAAGACTGGGGAG	5	RNA2	AD49ZG	RGEN-seq
chr6:89579472-89579491	89579488	11	10	sense	NGG	TATACTACAAGCCTGGAAAG	5	RNA2	AD49ZG	RGEN-seq
chr6:92076866-92076885	92076882	3	3	sense	NGG	TCTAATGAAAGACAGAAAGG	5	RNA2	AD49ZG	RGEN-seq
chr6:92357325-92357344	92357341	163	163	sense	NGG	TATACTAAAAGACTGGGGAG	5	RNA2	AD49ZG	RGEN-seq
chr6:94373559-94373578	94373575	372	371	sense	NGG	ACTTCTGGAAGACTGGAAAC	4	RNA2	AD49ZG	RGEN-seq
chr6:97427313-97427332	97427315	4	4	antisense	NGG	TCTATTGTAGGACTGGACAG	5	RNA2	AD49ZG	RGEN-seq
chr6:100126569-100126588	100126585	52	51	sense	NGG	GCTGCTAAGAGCATGGAAAG	5	RNA2	AD49ZG	RGEN-seq
chr6:102107218-102107237	102107234	77	76	sense	NGG	CCTACTGAAAAAGAGGAAAG	5	RNA2	AD49ZG	RGEN-seq
chr6:104267593-104267612	104267609	218	214	sense	NAG	AATAAGGAAAGACTGGAAAG	5	RNA2	AD49ZG	RGEN-seq
chr6:110356262-110356281	110356264	311	308	antisense	NGG	GGAGCTGGAAGACTGGAAGG	5	RNA2	AD49ZG	RGEN-seq
chr6:112994807-112994826	112994809	3	3	antisense	NGG	TCTGGGGAAAGACAGGAAGA	5	RNA2	AD49ZG	RGEN-seq
chr6:114768030-114768049	114768032	319	317	antisense	NGG	CCTACTGGAAAACTGGAAAT	5	RNA2	AD49ZG	RGEN-seq
chr6:114935509-114935528	114935525	87	85	sense	NGG	TGGGCTGGAAGACTGGAAGA	5	RNA2	AD49ZG	RGEN-seq
chr6:115871493-115871512	115871495	8	8	antisense	NGG	GCTCCTGAAGGACTGACAAG	5	RNA2	AD49ZG	RGEN-seq
chr6:123288882-123288901	123288898	41	41	sense	NGG	TCTTCAAAAAAACTGGAAGG	5	RNA2	AD49ZG	RGEN-seq
chr6:124389857-124389876	124389859	4	4	antisense	NAG	GAGGCTCCAAGACTGGAAAG	5	RNA2	AD49ZG	RGEN-seq
chr6:126769974-126769993	126769990	47	47	sense	NGG	TTAGCTCAAGAACTGGAAAG	5	RNA2	AD49ZG	RGEN-seq
chr6:129128213-129128232	129128215	17	16	antisense	NGG	ACTGTTGAAAGCCTAGAATG	5	RNA2	AD49ZG	RGEN-seq
chr6:129215762-129215781	129215778	9	7	sense	NAG	TCTTTTGGAAGACAGGAAAG	4	RNA2	AD49ZG	RGEN-seq
chr6:131551388-131551407	131551404	5	5	sense	NAG	TCTGGGGAAAGACTGGGTAG	4	RNA2	AD49ZG	RGEN-seq
chr6:134913749-134913768	134913751	468	465	antisense	NGG	TCTCCTGAAAGACAGGAAAG	2	RNA2	AD49ZG	RGEN-seq
chr6:135126144-135126163	135126160	6	6	sense	NAG	CCACCTGAAAAAATGGAAAG	5	RNA2	AD49ZG	RGEN-seq
chr6:137403723-137403742	137403739	6	6	sense	NGG	GCTGCTGGAAGCATGGAGAG	5	RNA2	AD49ZG	RGEN-seq
chr6:139241586-139241605	139241602	13	13	sense	NGG	TCTGCTCAAAACCTGAAAAG	4	RNA2	AD49ZG	RGEN-seq
chr6:139280364-139280383	139280366	4	4	antisense	NGG	TCTGGTGAAAGAGAGGAAAT	4	RNA2	AD49ZG	RGEN-seq
chr6:141321399-141321418	141321401	46	45	antisense	NGG	TATGCAGAAAGACTGGCAGG	4	RNA2	AD49ZG	RGEN-seq
chr6:141336829-141336848	141336845	4	4	sense	NGG	TGTGGTGAAATACTGATAAG	5	RNA2	AD49ZG	RGEN-seq
chr6:141442162-141442181	141442178	23	23	sense	NGG	TCTGGTCAAATACTGGAAAT	4	RNA2	AD49ZG	RGEN-seq
chr6:142760327-142760346	142760343	5	5	sense	NAG	ACTGTGGACAGACTGAAAAG	5	RNA2	AD49ZG	RGEN-seq
chr6:143104784-143104803	143104786	297	292	antisense	NGG	CCTGTTGAATAATTGGAAAG	5	RNA2	AD49ZG	RGEN-seq
chr6:144309446-144309465	144309462	12	12	sense	NGG	TCTGCCCAAACACAGGAAAG	4	RNA2	AD49ZG	RGEN-seq
chr6:149268463-149268482	149268479	18	18	sense	NGG	ACTGTTGAATGAATGAAAAG	5	RNA2	AD49ZG	RGEN-seq
chr6:153880311-153880330	153880327	17	6	sense	NGG	TGTCCTGAAAGACTGTAACA	5	RNA2	AD49ZG	RGEN-seq
chr6:154199853-154199872	154199855	115	114	antisense	NGG	GCTGCTGATGGAATGGAAAG	4	RNA2	AD49ZG	RGEN-seq
chr6:154533267-154533286	154533269	86	84	antisense	NAG	GTTGCTGGTAGACTGGAAAT	5	RNA2	AD49ZG	RGEN-seq
chr7:4046885-4046904	4046887	40	39	antisense	NAG	TCAGATGAAAGACTGAAGAG	4	RNA2	AD49ZG	RGEN-seq
chr7:5519993-5520012	5519995	190	190	antisense	NGG	TCTGCTGAAGAACTGAAAAC	4	RNA2	AD49ZG	RGEN-seq
chr7:10090835-10090854	10090851	3	3	sense	NAG	TCTAATGAGAGACAGAAAAG	5	RNA2	AD49ZG	RGEN-seq
chr7:11513996-11514015	11514012	4	4	sense	NGG	TTTGGAGAGAGACTGGAAAC	5	RNA2	AD49ZG	RGEN-seq
chr7:12238965-12238984	12238967	99	95	antisense	NGG	TAAGCAGAAAGGCTGGACAG	5	RNA2	AD49ZG	RGEN-seq
chr7:13487536-13487555	13487552	192	190	sense	NGG	GATGGAGAAAGACGGGAAAG	5	RNA2	AD49ZG	RGEN-seq
chr7:15786084-15786103	15786100	6	6	sense	NGG	TTTTCAGAAAGACTGGAGAA	5	RNA2	AD49ZG	RGEN-seq
chr7:18412014-18412033	18412016	6	6	antisense	NGG	TCTGCTGTGAGACAGGAGAG	4	RNA2	AD49ZG	RGEN-seq
chr7:20553250-20553269	20553266	282	280	sense	NGG	CCTGTTGAAGAACTGAAAAG	5	RNA2	AD49ZG	RGEN-seq
chr7:21082691-21082710	21082707	12	12	sense	NGG	TCTGCTGAGGGACTGGTAAT	4	RNA2	AD49ZG	RGEN-seq
chr7:23943231-23943250	23943247	41	41	sense	NGG	TATTCTGGAAGACTGGACAA	5	RNA2	AD49ZG	RGEN-seq
chr7:26739358-26739377	26739374	40	40	sense	NGG	GGTGGTGAAAGAAAGGAAAG	5	RNA2	AD49ZG	RGEN-seq
chr7:27751096-27751115	27751098	6	6	antisense	NGG	TCTTTTTAAAGAATGAAAAG	5	RNA2	AD49ZG	RGEN-seq
chr7:28801905-28801924	28801907	20	20	antisense	NGG	GCTTCTGAGAGACTGGTGAG	5	RNA2	AD49ZG	RGEN-seq
chr7:30557476-30557495	30557492	38	37	sense	NGG	CCTGCTGTGAGATAGGAAAG	5	RNA2	AD49ZG	RGEN-seq
chr7:32298966-32298985	32298968	279	279	antisense	NGG	TATTGTGAAAGTCTGGAAAG	4	RNA2	AD49ZG	RGEN-seq
chr7:37525858-37525877	37525874	28	28	sense	NGG	TCAGCTTAAATGCTGGAAAG	4	RNA2	AD49ZG	RGEN-seq
chr7:38406039-38406058	38406041	341	336	antisense	NGG	TCTGCCTAAAGACAGGAAAG	3	RNA2	AD49ZG	RGEN-seq
chr7:38896644-38896663	38896660	257	255	sense	NGG	TCTTCAGAAACACTGGAAAT	4	RNA2	AD49ZG	RGEN-seq
chr7:43559002-43559021	43559004	41	36	antisense	NAG	ATTGTGGAAAGACTGGATAG	5	RNA2	AD49ZG	RGEN-seq
chr7:47542197-47542216	47542199	317	316	antisense	NGG	TTTGCTGGAAAACTAGAAAG	4	RNA2	AD49ZG	RGEN-seq
chr7:48683743-48683762	48683759	131	131	sense	NGG	TCTGGTGAAAGAATGGGAAG	3	RNA2	AD49ZG	RGEN-seq
chr7:49507094-49507113	49507110	9	7	sense	NGG	TGTGCTGAAAGACTTAAAGG	4	RNA2	AD49ZG	RGEN-seq
chr7:50819104-50819123	50819106	161	159	antisense	NGG	ACTACTGGAAAGCTGGAAAG	5	RNA2	AD49ZG	RGEN-seq
chr7:50964770-50964789	50964772	15	15	antisense	NGG	TTGTCTGAAAGACTTGAAAA	5	RNA2	AD49ZG	RGEN-seq
chr7:52081799-52081818	52081815	5	5	sense	NGG	TTTGATTAAAGATTGGAAGG	5	RNA2	AD49ZG	RGEN-seq
chr7:53760129-53760148	53760131	138	138	antisense	NGG	ACTGCAGAAAAACTAGAAAA	5	RNA2	AD49ZG	RGEN-seq
chr7:55688199-55688218	55688201	13	11	antisense	NGG	TCTGCTTGTAGAATGGAGAG	5	RNA2	AD49ZG	RGEN-seq
chr7:59639093-59639112	59639109	8	8	sense	NGG	GCTATTGAACAACTGGAAAG	5	RNA2	AD49ZG	RGEN-seq
chr7:60892651-60892670	60892653	3	3	antisense	NGG	CCTTCTTTAAGACTGGTAAG	5	RNA2	AD49ZG	RGEN-seq
chr7:64681077-64681096	64681093	4	3	sense	NAG	TTTACTTAAAGACGGGAAAG	4	RNA2	AD49ZG	RGEN-seq
chr7:65106090-65106109	65106092	13	13	antisense	NGG	TCTACATACAGAATGGAAAG	5	RNA2	AD49ZG	RGEN-seq
chr7:66560246-66560265	66560248	13	13	antisense	NAG	ACTGAAAAATGACTGGAAAG	5	RNA2	AD49ZG	RGEN-seq
chr7:73206827-73206846	73206829	27	27	antisense	NGG	AATGCTCAAAGACAGGAAAC	5	RNA2	AD49ZG	RGEN-seq
chr7:73740894-73740913	73740896	22	22	antisense	NGG	TGGGGTGGAAGACTGGAAAG	4	RNA2	AD49ZG	RGEN-seq
chr7:73763348-73763367	73763350	7	6	antisense	NAG	ACAGATGAGAGACTGAAAAG	5	RNA2	AD49ZG	RGEN-seq
chr7:76495625-76495644	76495627	7	7	antisense	NGG	CCTGCTGCAATACTGGCTAG	5	RNA2	AD49ZG	RGEN-seq
chr7:79487697-79487716	79487713	5	5	sense	NAG	TTAACTGAAGGACTGGAAGG	5	RNA2	AD49ZG	RGEN-seq
chr7:81222442-81222461	81222444	4	4	antisense	NGG	TCTAAGGAAAGACTTGAAAT	5	RNA2	AD49ZG	RGEN-seq
chr7:84426151-84426170	84426153	63	63	antisense	NGG	ACAGCTGACAGACTGGGAAA	5	RNA2	AD49ZG	RGEN-seq
chr7:85559617-85559636	85559633	5	5	sense	NGG	TCTGGTCAAACACTGGAAAC	4	RNA2	AD49ZG	RGEN-seq
chr7:86536898-86536917	86536914	193	193	sense	NGG	GCATATGAAAGACTGGAAAA	5	RNA2	AD49ZG	RGEN-seq
chr7:86586275-86586294	86586291	174	171	sense	NGG	ACATGTGAAAGACTGGAAAA	5	RNA2	AD49ZG	RGEN-seq
chr7:93362960-93362979	93362962	5	5	antisense	NAG	AATGCACACAGACTGGAAAG	5	RNA2	AD49ZG	RGEN-seq
chr7:93430915-93430934	93430931	33	33	sense	NAG	TATGCTGAAGGACTGGGAAG	3	RNA2	AD49ZG	RGEN-seq
chr7:98841479-98841498	98841495	4	4	sense	NAG	TCTGATCAACAACTGGAAAG	4	RNA2	AD49ZG	RGEN-seq
chr7:109032293-109032312	109032309	5	5	sense	NGG	TGAGCTGTAAGACAGGAAGG	5	RNA2	AD49ZG	RGEN-seq
chr7:109367262-109367281	109367264	88	88	antisense	NGG	TCTGTTGAAGGACTGTAATG	4	RNA2	AD49ZG	RGEN-seq
chr7:113649565-113649584	113649567	220	217	antisense	NGG	CATACTAAAAGACTGGAAAG	4	RNA2	AD49ZG	RGEN-seq
chr7:115460245-115460264	115460247	16	16	antisense	NAG	ACTACTGAACAACTGGAATG	5	RNA2	AD49ZG	RGEN-seq
chr7:116281176-116281195	116281192	140	140	sense	NGG	GCAGCTGAAAGGATGAAAAG	5	RNA2	AD49ZG	RGEN-seq
chr7:117126668-117126687	117126684	235	233	sense	NGG	GCTGTGGAAACACTGGAAAG	4	RNA2	AD49ZG	RGEN-seq
chr7:119182642-119182661	119182644	149	147	antisense	NGG	TCTGTGAAAAGCCTGGAAAG	4	RNA2	AD49ZG	RGEN-seq
chr7:119186333-119186352	119186349	4	4	sense	NGG	TTTGCTAAAAGACAGGATGG	5	RNA2	AD49ZG	RGEN-seq
chr7:122854926-122854945	122854928	276	274	antisense	NGG	ACAGATGAAAGACAGGAAAG	4	RNA2	AD49ZG	RGEN-seq
chr7:125351792-125351811	125351808	10	10	sense	NGG	TCTGATAAAAGAATAGAAAA	5	RNA2	AD49ZG	RGEN-seq
chr7:125639725-125639744	125639741	78	75	sense	NGG	TTTGGTGAAGGACTGGAAAG	3	RNA2	AD49ZG	RGEN-seq
chr7:126265580-126265599	126265582	5	5	antisense	NAG	TTAGATGAGAGACTGGAGAG	5	RNA2	AD49ZG	RGEN-seq
chr7:129730979-129730998	129730995	6	6	sense	NAG	TCTTCTCAAAGACTGATAAG	4	RNA2	AD49ZG	RGEN-seq
chr7:131162005-131162024	131162007	10	10	antisense	NGG	AGTGCTGAACTACTGGAAGG	5	RNA2	AD49ZG	RGEN-seq
chr7:132982002-132982021	132982018	10	10	sense	NGG	GCTGCTTAAAAGCTGGACAG	5	RNA2	AD49ZG	RGEN-seq
chr7:133200965-133200984	133200967	14	14	antisense	NGG	ACTGCTTAAAGTCTAGAAAA	5	RNA2	AD49ZG	RGEN-seq
chr7:134296301-134296320	134296303	76	73	antisense	NGG	TCTGCTGATAGGCTGAAATG	4	RNA2	AD49ZG	RGEN-seq
chr7:135821024-135821043	135821040	9	9	sense	NGG	ACTACTGAAAGACAGACAAG	5	RNA2	AD49ZG	RGEN-seq
chr7:136964314-136964333	136964316	28	28	antisense	NGG	TTTGCTGATTGATTAGAAAG	5	RNA2	AD49ZG	RGEN-seq
chr7:137591300-137591319	137591302	3	3	antisense	NGG	TCTTAGTACAGACTGGAAAG	5	RNA2	AD49ZG	RGEN-seq
chr7:137929808-137929827	137929810	260	256	antisense	NGG	GCAGCTGAAAAACAAGAAAG	5	RNA2	AD49ZG	RGEN-seq
chr7:139113465-139113484	139113467	19	19	antisense	NAG	AATCCCGTAAGACTGGAAAG	5	RNA2	AD49ZG	RGEN-seq
chr7:139320345-139320364	139320361	133	131	sense	NGG	TAGGCAGAAAGACAGGATAG	5	RNA2	AD49ZG	RGEN-seq
chr7:139485814-139485833	139485830	5	5	sense	NAG	TCTTTTAAAAGACAGGAAAG	4	RNA2	AD49ZG	RGEN-seq
chr7:141077208-141077227	141077224	3	3	sense	NAG	TTTGAGGAAAGACTGGCAAG	4	RNA2	AD49ZG	RGEN-seq
chr7:142685892-142685911	142685908	31	31	sense	NGG	TCTGCAGCGTGACTGGAAAT	5	RNA2	AD49ZG	RGEN-seq
chr7:143915409-143915428	143915425	94	88	sense	NGG	TCTCCTCAAAGACTGGAACA	4	RNA2	AD49ZG	RGEN-seq
chr7:145044790-145044809	145044792	72	71	antisense	NGG	TCAGCTGGAAGGCAGGAAAG	4	RNA2	AD49ZG	RGEN-seq
chr7:146479816-146479835	146479832	58	57	sense	NGG	GATATTTAAAGACTGGAAAG	5	RNA2	AD49ZG	RGEN-seq
chr8:1556986-1557005	1557002	3	3	sense	NGG	TCTCTTGAAAGAAAGAAAAG	5	RNA2	AD49ZG	RGEN-seq
chr8:1973692-1973711	1973708	100	98	sense	NAG	GGTGACAAAAGACTGGAAAG	5	RNA2	AD49ZG	RGEN-seq
chr8:3282662-3282681	3282678	17	17	sense	NGG	TCTGATGAAAAACTAAGAAG	5	RNA2	AD49ZG	RGEN-seq
chr8:3659899-3659918	3659901	33	32	antisense	NGG	ACAGCTGGAAGACAGGAAGG	5	RNA2	AD49ZG	RGEN-seq
chr8:9125243-9125262	9125259	9	8	sense	NGG	TCTACTGATAGACTGTATAA	5	RNA2	AD49ZG	RGEN-seq
chr8:9976080-9976099	9976082	22	22	antisense	NGG	TAAGCTGGAACACAGGAAAG	5	RNA2	AD49ZG	RGEN-seq
chr8:12197248-12197267	12197250	103	101	antisense	NAG	TTTGCAGAGAGACTGGAGAG	4	RNA2	AD49ZG	RGEN-seq
chr8:14005995-14006014	14005997	46	44	antisense	NAG	AAGGCTGAAAGACTAGAAAG	4	RNA2	AD49ZG	RGEN-seq
chr8:14848249-14848268	14848251	4	4	antisense	NAG	ACAGCTTAAGAACTGGAAAG	5	RNA2	AD49ZG	RGEN-seq
chr8:17753607-17753626	17753623	5	5	sense	NGG	GCGGCTGGAAGGCTGGATAG	5	RNA2	AD49ZG	RGEN-seq
chr8:17809007-17809026	17809009	30	29	antisense	NGG	TTTATTGAAAAAATGGAAAG	5	RNA2	AD49ZG	RGEN-seq
chr8:20903838-20903857	20903854	18	16	sense	NGG	TCTACTAAGAGAGAGGAAAG	5	RNA2	AD49ZG	RGEN-seq
chr8:22905586-22905605	22905588	128	127	antisense	NGG	GTTTCTGAAAGACAGGAAGG	5	RNA2	AD49ZG	RGEN-seq
chr8:26597409-26597428	26597425	16	16	sense	NGG	TCTCATGAAAGAGTGGAAAA	4	RNA2	AD49ZG	RGEN-seq
chr8:28415233-28415252	28415249	6	6	sense	NGG	TCTAATGAAAGACAGAAAGG	5	RNA2	AD49ZG	RGEN-seq
chr8:31492694-31492713	31492696	305	302	antisense	NAG	ACTTGTAAAAGACTGGAAAG	4	RNA2	AD49ZG	RGEN-seq
chr8:33450489-33450508	33450505	46	46	sense	NAG	TTAGCTGAAATACTGGAGAG	4	RNA2	AD49ZG	RGEN-seq
chr8:34108814-34108833	34108830	296	295	sense	NAG	GGTATTGAAAAACTGGAAAG	5	RNA2	AD49ZG	RGEN-seq
chr8:35584916-35584935	35584932	140	138	sense	NAG	AGAGATGAAAGACTGGGAAG	5	RNA2	AD49ZG	RGEN-seq
chr8:37632201-37632220	37632203	182	180	antisense	NGG	TACACTGAGAGGCTGGAAAG	5	RNA2	AD49ZG	RGEN-seq
chr8:37706173-37706192	37706189	98	96	sense	NGG	TGTCTTGAAAGACTGAAGAG	5	RNA2	AD49ZG	RGEN-seq
chr8:37898323-37898342	37898325	154	151	antisense	NGG	GGAGCTGAAAGAAGGGAAAG	5	RNA2	AD49ZG	RGEN-seq
chr8:40004988-40005007	40005004	20	20	sense	NAG	GAGGCTGAGAGAATGGAAAG	5	RNA2	AD49ZG	RGEN-seq
chr8:40690932-40690951	40690934	59	58	antisense	NGG	TAGGCTGAAAAATTGGATAG	5	RNA2	AD49ZG	RGEN-seq
chr8:43444572-43444591	43444588	21	21	sense	NAG	CCAACAGATAGACTGGAAAG	5	RNA2	AD49ZG	RGEN-seq
chr8:46750302-46750321	46750318	12	12	sense	NGG	TCTGGGGAGAGACTAGAAAA	5	RNA2	AD49ZG	RGEN-seq
chr8:47050060-47050079	47050076	14	14	sense	NGG	TGTGATGAACAACTGGAAAA	5	RNA2	AD49ZG	RGEN-seq
chr8:50916677-50916696	50916693	4	4	sense	NAG	GCAGCTGACAGACTAGTAAG	5	RNA2	AD49ZG	RGEN-seq
chr8:51951764-51951783	51951766	46	46	antisense	NAG	TTTGCTTAAAGACTGGAAGA	4	RNA2	AD49ZG	RGEN-seq
chr8:52478066-52478085	52478068	154	154	antisense	NAG	TCTGCTGAGAGACAGGAAAG	2	RNA2	AD49ZG	RGEN-seq
chr8:54729876-54729895	54729892	5	5	sense	NAG	TCAGCTAAATGACTGGAAAC	4	RNA2	AD49ZG	RGEN-seq
chr8:55055473-55055492	55055489	10	9	sense	NGG	TCACCTAGTAGACTGGAAAG	5	RNA2	AD49ZG	RGEN-seq
chr8:58275772-58275791	58275788	4	4	sense	NGG	ACTGCTTAAAGACAGAAAAA	5	RNA2	AD49ZG	RGEN-seq
chr8:62091560-62091579	62091562	9	9	antisense	NAG	TCTTCTGGAAAACTGGAAAC	4	RNA2	AD49ZG	RGEN-seq
chr8:62651327-62651346	62651329	92	92	antisense	NAG	TCCTCTAGAAGACTGGAAAG	4	RNA2	AD49ZG	RGEN-seq
chr8:67513258-67513277	67513274	156	155	sense	NAG	TAATCTGTAAGACTGGAAAG	4	RNA2	AD49ZG	RGEN-seq
chr8:70272446-70272465	70272448	220	218	antisense	NGG	TGTCTTGAAAAACTGAAAAG	5	RNA2	AD49ZG	RGEN-seq
chr8:71513305-71513324	71513321	97	97	sense	NGG	TATGCTAATCCACTGGAAAG	5	RNA2	AD49ZG	RGEN-seq
chr8:71838043-71838062	71838045	5	5	antisense	NAG	TCTAGTGAGGGACTGGAAAG	4	RNA2	AD49ZG	RGEN-seq
chr8:72783250-72783269	72783252	65	64	antisense	NGG	TCTAATGAGAGACAGAAAAG	5	RNA2	AD49ZG	RGEN-seq
chr8:72981228-72981247	72981244	20	20	sense	NAG	ACTGAAGAGAGATTGGAAAG	5	RNA2	AD49ZG	RGEN-seq
chr8:73549564-73549583	73549580	7	7	sense	NGG	TTTGTTAAAGGACTGGAAAA	5	RNA2	AD49ZG	RGEN-seq
chr8:74111144-74111163	74111160	1026	1012	sense	NGG	GAAGCTGAAACACTGGACAG	5	RNA2	AD49ZG	RGEN-seq
chr8:74724000-74724019	74724016	119	117	sense	NGG	TCTACTGAAAGACTAGAAGT	4	RNA2	AD49ZG	RGEN-seq
chr8:77706579-77706598	77706581	151	151	antisense	NGG	GTTGCTGAAAGAGAGAAAAG	5	RNA2	AD49ZG	RGEN-seq
chr8:77986609-77986628	77986611	101	101	antisense	NGG	TATGCTATGAAACTGGAAAG	5	RNA2	AD49ZG	RGEN-seq
chr8:78228295-78228314	78228311	7	7	sense	NGG	TATGCTGATAGAAAAGAAAG	5	RNA2	AD49ZG	RGEN-seq
chr8:79027041-79027060	79027057	269	267	sense	NGG	CCGGCTGCAAGACTGGAAAG	3	RNA2	AD49ZG	RGEN-seq
chr8:81040046-81040065	81040062	118	116	sense	NAG	CATGGAGAAAGACTGGAAAA	5	RNA2	AD49ZG	RGEN-seq
chr8:83676871-83676890	83676887	55	55	sense	NGG	TCTGCTGGAGGACTGCAAAG	3	RNA2	AD49ZG	RGEN-seq
chr8:85548135-85548154	85548137	17	17	antisense	NGG	TCAACTAACAAACTGGAAAG	5	RNA2	AD49ZG	RGEN-seq
chr8:85662576-85662595	85662578	115	113	antisense	NGG	CCTGCTTGAAGAATGGAAAC	5	RNA2	AD49ZG	RGEN-seq
chr8:87690861-87690880	87690863	7	7	antisense	NGG	TCTGCAAAAGCATTGGAAAG	5	RNA2	AD49ZG	RGEN-seq
chr8:88538267-88538286	88538283	16	16	sense	NGG	ACCTCTGAAATACTTGAAAG	5	RNA2	AD49ZG	RGEN-seq
chr8:89599078-89599097	89599080	11	11	antisense	NAG	GGGGTTGTAAGACTGGAAAG	5	RNA2	AD49ZG	RGEN-seq
chr8:90358123-90358142	90358139	15	13	sense	NGG	TCTGAAGAAAGACTGAGAAA	5	RNA2	AD49ZG	RGEN-seq
chr8:90997938-90997957	90997954	102	102	sense	NGG	TCTAATGAGAGACAGAAAAG	5	RNA2	AD49ZG	RGEN-seq
chr8:92191908-92191927	92191924	50	50	sense	NGG	CCTGCTGAAGGCCTGGTAAG	4	RNA2	AD49ZG	RGEN-seq
chr8:92987017-92987036	92987019	7	7	antisense	NAG	CCAGCTAAGAGGCTGGAAAG	5	RNA2	AD49ZG	RGEN-seq
chr8:93608395-93608414	93608397	242	241	antisense	NGG	GATGCTGGAGAACTGGAAAG	5	RNA2	AD49ZG	RGEN-seq
chr8:93715638-93715657	93715654	69	68	sense	NGG	TTTGTTGAAAAACTAGAAAT	5	RNA2	AD49ZG	RGEN-seq
chr8:95334142-95334161	95334158	423	423	sense	NGG	TGTGATGAAAGATTGAAAAG	4	RNA2	AD49ZG	RGEN-seq
chr8:97622090-97622109	97622092	7	7	antisense	NGG	TTTGGAGAAAGACAGGAATG	5	RNA2	AD49ZG	RGEN-seq
chr9:2497825-2497844	2497827	11	11	antisense	NGG	GTTGGTGAAAGGCTGGAGAG	5	RNA2	AD49ZG	RGEN-seq
chr9:4430739-4430758	4430741	4	4	antisense	NAG	TCTGCTGCAAGACTGGTTGA	5	RNA2	AD49ZG	RGEN-seq
chr9:4730644-4730663	4730646	30	29	antisense	NGG	TGTGTTGAAAGACTGGAGAC	4	RNA2	AD49ZG	RGEN-seq
chr9:7142997-7143016	7142999	12	12	antisense	NGG	GATGCTGAAAGATGGTAAAG	5	RNA2	AD49ZG	RGEN-seq
chr9:12297845-12297864	12297847	7	7	antisense	NGG	TGTTGGGAAAGACAGGAAAG	5	RNA2	AD49ZG	RGEN-seq
chr9:14861906-14861925	14861908	148	148	antisense	NGG	TGGGCTGAAGAACTGGAAAG	4	RNA2	AD49ZG	RGEN-seq
chr9:15343435-15343454	15343437	5	4	antisense	NGG	TGTTCTACAAGGCTGGAAAG	5	RNA2	AD49ZG	RGEN-seq
chr10:687074-687093	687090	4	4	sense	NGG	TTTGATGAAATACTGGCAAA	5	RNA2	AD49ZG	RGEN-seq
chr10:837962-837981	837978	50	48	sense	NAG	CTTCCTAAAAGACTGGAGAG	5	RNA2	AD49ZG	RGEN-seq
chr10:1581569-1581588	1581585	116	116	sense	NGG	TTTGCTGGAAAACTGGTAAA	5	RNA2	AD49ZG	RGEN-seq
chr10:6762563-6762582	6762579	18	18	sense	NAG	GCTGCAGAAAAACTGAGAAG	5	RNA2	AD49ZG	RGEN-seq
chr10:6999517-6999536	6999519	1197	1189	antisense	NAG	GAAGCTGAAAAACTGAAAAG	5	RNA2	AD49ZG	RGEN-seq
chr10:7152268-7152287	7152284	6	6	sense	NAG	TGTGCTGAAAGAACAGAAAG	4	RNA2	AD49ZG	RGEN-seq
chr10:9946022-9946041	9946038	6	6	sense	NAG	TTTTCAGAAAGATTGGAAAA	5	RNA2	AD49ZG	RGEN-seq
chr10:11239636-11239655	11239638	6	6	antisense	NAG	TGGGTTGAAAGACTAGAAGG	5	RNA2	AD49ZG	RGEN-seq
chrX:5105430-5105449	5105446	5	5	sense	NGG	ACTGATGATTGACTGGGAAG	5	RNA2	AD49ZG	RGEN-seq
chrX:6082465-6082484	6082481	47	47	sense	NGG	ACTACTGAAAGAAGAGAAAG	5	RNA2	AD49ZG	RGEN-seq
chrX:11033084-11033103	11033086	157	156	antisense	NGG	AAAGCTGAATGACTGGAAAG	4	RNA2	AD49ZG	RGEN-seq
chrX:11278104-11278123	11278106	32	31	antisense	NAG	TCTAATGAAAGACTGAAATG	4	RNA2	AD49ZG	RGEN-seq
chrX:11829839-11829858	11829855	4	4	sense	NAG	CCTGGAAAAGGACTGGAAAG	5	RNA2	AD49ZG	RGEN-seq
chrX:14757789-14757808	14757805	20	20	sense	NGG	TTTCCTGAAGGACTGGCAAG	4	RNA2	AD49ZG	RGEN-seq
chrX:14810817-14810836	14810833	26	26	sense	NAG	TCTGCTGAATTACTGTAAAG	3	RNA2	AD49ZG	RGEN-seq
chrX:16591987-16592006	16591989	3	3	antisense	NGG	TCTGCAGGAAGACAGGACAG	4	RNA2	AD49ZG	RGEN-seq
chrX:21485120-21485139	21485136	8	8	sense	NAG	ATGGCTGAAAGACTGGCAAG	4	RNA2	AD49ZG	RGEN-seq
chrX:24104877-24104896	24104879	44	44	antisense	NGG	ACTGGAGAAAGATTTGAAAG	5	RNA2	AD49ZG	RGEN-seq
chrX:24298740-24298759	24298756	4	4	sense	NGG	TTTGTTGAGGGATTGGAAAG	5	RNA2	AD49ZG	RGEN-seq
chrX:25358732-25358751	25358734	268	263	antisense	NGG	TAGTCAGAAAGACTAGAAAG	5	RNA2	AD49ZG	RGEN-seq
chrX:27281122-27281141	27281124	63	62	antisense	NAG	TCAGATGAAACACTGGAAAG	3	RNA2	AD49ZG	RGEN-seq
chrX:30448768-30448787	30448770	8	8	antisense	NGG	TCTGTAGAAAGACAGAGAAG	5	RNA2	AD49ZG	RGEN-seq
chrX:31191591-31191610	31191607	29	28	sense	NGG	TCTACTGAAAAATGAGAAAG	5	RNA2	AD49ZG	RGEN-seq
chrX:33366050-33366069	33366052	52	52	antisense	NGG	TAAACTGAAAGTCTGGGAAG	5	RNA2	AD49ZG	RGEN-seq
chrX:33603400-33603419	33603402	29	28	antisense	NGG	TCTGACCAAAGAATGGAAAT	5	RNA2	AD49ZG	RGEN-seq
chrX:37421692-37421711	37421694	231	231	antisense	NAG	AGCAATGAAAGACTGGAAAG	5	RNA2	AD49ZG	RGEN-seq
chrX:38659049-38659068	38659051	16	16	antisense	NGG	TCAGCTAAAAGACAGGTCAG	5	RNA2	AD49ZG	RGEN-seq
chrX:43794449-43794468	43794465	22	22	sense	NGG	TCTAATGAGAGACAGAAAAG	5	RNA2	AD49ZG	RGEN-seq
chrX:45625057-45625076	45625073	84	84	sense	NGG	CATGCTGCAGGATTGGAAAG	5	RNA2	AD49ZG	RGEN-seq
chrX:53384383-53384402	53384385	11	11	antisense	NGG	CCTACTGAAATACTTAAAAG	5	RNA2	AD49ZG	RGEN-seq
chrX:54659530-54659549	54659546	13	13	sense	NGG	CCCTCTGAACAACTGGAAAG	5	RNA2	AD49ZG	RGEN-seq
chrX:55699059-55699078	55699075	38	38	sense	NAG	TGAGCTGAGAGGCTGGAAAG	4	RNA2	AD49ZG	RGEN-seq
chrX:58187444-58187463	58187446	220	219	antisense	NGG	AATGCTAGAAGACTGAAAAG	5	RNA2	AD49ZG	RGEN-seq
chrX:59450965-59450984	59450967	252	250	antisense	NAG	TTCAAGGAAAGACTGGAAAG	5	RNA2	AD49ZG	RGEN-seq
chrX:61453770-61453789	61453772	101	101	antisense	NGG	TATTTTGAAAGACAGGAAAG	4	RNA2	AD49ZG	RGEN-seq
chrX:66001634-66001653	66001650	3	3	sense	NAG	TCTGCTCAAAGACTAGAGAG	3	RNA2	AD49ZG	RGEN-seq
chrX:70554793-70554812	70554809	16	16	sense	NGG	GCTGCTGAGACACTGGATTG	5	RNA2	AD49ZG	RGEN-seq
chrX:71071815-71071834	71071817	223	223	antisense	NGG	ACTAATGAAAAACTGAAAAG	5	RNA2	AD49ZG	RGEN-seq
chrX:71582768-71582787	71582784	14	12	sense	NAG	TTTGCTGAGAGACTGAATAA	5	RNA2	AD49ZG	RGEN-seq
chrX:74012500-74012519	74012502	159	157	antisense	NGG	AGAGCAGAAATACTGGAAAG	5	RNA2	AD49ZG	RGEN-seq
chrX:77628394-77628413	77628410	8	8	sense	NAG	ACTGTTCAAAGAATGGAAAG	4	RNA2	AD49ZG	RGEN-seq
chrX:80694009-80694028	80694025	146	143	sense	NGG	CATGATGGAAGATTGGAAAG	5	RNA2	AD49ZG	RGEN-seq
chrX:82121503-82121522	82121505	278	238	antisense	NAG	AGTGCTCAAACACTGGAAAG	4	RNA2	AD49ZG	RGEN-seq
chrX:82994168-82994187	82994170	3	3	antisense	NAG	TTTGCTGAGAGACAAGAAAT	5	RNA2	AD49ZG	RGEN-seq
chrX:85694808-85694827	85694810	20	20	antisense	NAG	ACAGATAAAAGAATGGAAAG	5	RNA2	AD49ZG	RGEN-seq
chrX:86673107-86673126	86673123	4	4	sense	NGG	TCTGGAGTAAGACTGGACAA	5	RNA2	AD49ZG	RGEN-seq
chrX:89988087-89988106	89988089	143	141	antisense	NAG	TAAGAGGAAAGACTAGAAAG	5	RNA2	AD49ZG	RGEN-seq
chrX:92871457-92871476	92871459	5	5	antisense	NGG	TCTGAGGAAAGTCTGGAAGG	4	RNA2	AD49ZG	RGEN-seq
chrX:95450309-95450328	95450311	10	9	antisense	NAG	AATAGTGAAAGCCTGGAAAG	5	RNA2	AD49ZG	RGEN-seq
chrX:96421176-96421195	96421178	20	19	antisense	NGG	CCTACTGAAAGCAGGGAAAG	5	RNA2	AD49ZG	RGEN-seq
chrX:103181473-103181492	103181489	329	326	sense	NAG	AAAGTAGAAAGACTGGAAAG	5	RNA2	AD49ZG	RGEN-seq
chrX:103211495-103211514	103211497	177	175	antisense	NGG	TCTGCTTAAAGTCAGGAAAG	3	RNA2	AD49ZG	RGEN-seq
chrX:105539940-105539959	105539942	41	41	antisense	NGG	TTTCAAGAAAGAATGGAAAG	5	RNA2	AD49ZG	RGEN-seq
chrX:110719684-110719703	110719700	25	25	sense	NAG	GATGTTAAAACACTGGAAAG	5	RNA2	AD49ZG	RGEN-seq
chrX:113469081-113469100	113469083	69	67	antisense	NGG	TTTGCCAAAAGCCTGAAAAG	5	RNA2	AD49ZG	RGEN-seq
chrX:116481598-116481617	116481600	38	38	antisense	NAG	TCTAATGAAAGACAGAAAAG	4	RNA2	AD49ZG	RGEN-seq
chrX:119317082-119317101	119317098	6	4	sense	NGG	GCTGCTGAGAGAATGAAAAT	5	RNA2	AD49ZG	RGEN-seq
chrX:119906700-119906719	119906716	3	3	sense	NAG	TCAGCTGGAAGACAGGAAAT	4	RNA2	AD49ZG	RGEN-seq
chrX:122418828-122418847	122418830	44	38	antisense	NAG	TATGCTGTAAGACTGATAAA	5	RNA2	AD49ZG	RGEN-seq
chrX:123963087-123963106	123963103	7	7	sense	NGG	TCTGGAGAAAGACTAGAGAA	5	RNA2	AD49ZG	RGEN-seq
chrX:128238920-128238939	128238936	7	7	sense	NGG	TCTGATGAGAGACAGTAAAG	4	RNA2	AD49ZG	RGEN-seq
chrX:133271312-133271331	133271328	26	26	sense	NGG	TCTAATGAGAGACAGAAAAG	5	RNA2	AD49ZG	RGEN-seq
chrX:134794034-134794053	134794036	12	12	antisense	NGG	TCTGCTTTAGCACTGGAAAA	5	RNA2	AD49ZG	RGEN-seq
chrX:134898112-134898131	134898128	45	45	sense	NAG	TCTAATGAAAGACAGAAAAG	4	RNA2	AD49ZG	RGEN-seq
chrY:3787880-3787899	3787882	9	9	antisense	NGG	ATTGGTGAAGGACAGGAAAG	5	RNA2	AD49ZG	RGEN-seq
chrY:6919914-6919933	6919916	3	3	antisense	NAG	TCTGCAGGAAGACTGGGTAG	4	RNA2	AD49ZG	RGEN-seq
chrY:7231653-7231672	7231669	338	333	sense	NGG	GCTGCAGGAAGACTGGAAAC	4	RNA2	AD49ZG	RGEN-seq
chrY:9484743-9484762	9484759	17	17	sense	NGG	AGTGCTGGAAGACAGGAAGG	5	RNA2	AD49ZG	RGEN-seq
chrY:12699194-12699213	12699210	44	43	sense	NGG	TCAATTGGAAGACTGGCAAG	5	RNA2	AD49ZG	RGEN-seq
chrY:17847034-17847053	17847050	3	3	sense	NGG	CCTGCTGCAAGGCTGGCTAG	5	RNA2	AD49ZG	RGEN-seq
chrY:21410521-21410540	21410537	33	33	sense	NGG	TCCACCGAGAGACTGGAAAG	4	RNA2	AD49ZG	RGEN-seq
chrE:1371675-1371694	1371691	464	462	sense	NGG	TCTGCTGAAAGACTGGAAAG	0	RNA2	AD49ZG	RGEN-seq
chr0:727019-727038	727035	9	9	sense	NGG	ACGTTGGCCTGAGAATCCAG	5	RNA3	AD49ZG	RGEN-seq
chr0:12127193-12127212	12127209	7	7	sense	NGG	CCTTGTCACTCAGCATCCAT	5	RNA3	AD49ZG	RGEN-seq
chr0:13924032-13924051	13924048	7	7	sense	NGG	ACCTCTGGAAGAGTATCCAG	5	RNA3	AD49ZG	RGEN-seq
chr0:14054028-14054047	14054030	89	89	antisense	NGG	ACCTTTGACTGAGCGTTCAG	3	RNA3	AD49ZG	RGEN-seq
chr0:15200061-15200080	15200063	99	99	antisense	NGG	TTCTCTGAAAGAGCATCCAG	5	RNA3	AD49ZG	RGEN-seq
chr0:21436241-21436260	21436257	23	23	sense	NGG	TGCTGTGCCTGTCCATCCAG	5	RNA3	AD49ZG	RGEN-seq
chr0:29671783-29671802	29671799	38	38	sense	NGG	TCAGCTGAGTGAGCATCCAG	5	RNA3	AD49ZG	RGEN-seq
chr0:29722699-29722718	29722701	5	5	antisense	NGG	ACCTGCAACTCCACATCCAG	5	RNA3	AD49ZG	RGEN-seq
chr0:31120566-31120585	31120568	11	11	antisense	NGG	CCCTGTGACCAAGCATGTAG	5	RNA3	AD49ZG	RGEN-seq
chr0:36601594-36601613	36601596	20	20	antisense	NAG	ACAAGAAACTTAGCATCCAG	5	RNA3	AD49ZG	RGEN-seq
chr0:42953535-42953554	42953537	11	11	antisense	NGG	GCCTGAGACTGAGCGTTCAG	4	RNA3	AD49ZG	RGEN-seq
chr0:44169416-44169435	44169418	38	38	antisense	NGG	GCCCCAGACTGTGCATCCAG	5	RNA3	AD49ZG	RGEN-seq
chr0:48281693-48281712	48281709	79	79	sense	NGG	TGCTGTGATTGAGCATCCTT	5	RNA3	AD49ZG	RGEN-seq
chr0:48835559-48835578	48835561	234	234	antisense	NGG	AGATAAGACTGAGAATCCAG	5	RNA3	AD49ZG	RGEN-seq
chr0:52355149-52355168	52355165	3	3	sense	NAG	GTTTCTGACTGTGCATCCAG	5	RNA3	AD49ZG	RGEN-seq
chr0:54534584-54534603	54534586	4	3	antisense	NAG	TCCTGTGTTTTAGCATCCAT	5	RNA3	AD49ZG	RGEN-seq
chr0:61016396-61016415	61016398	139	139	antisense	NGG	ACAATTAACTGAGCATCAAG	5	RNA3	AD49ZG	RGEN-seq
chr0:62541989-62542008	62542005	97	97	sense	NGG	CCTTGGGACTGAGCATCCTC	5	RNA3	AD49ZG	RGEN-seq
chr0:65278865-65278884	65278867	26	26	antisense	NGG	AGCACTGGCTGATCATCCAG	5	RNA3	AD49ZG	RGEN-seq
chr0:69306596-69306615	69306598	51	51	antisense	NAG	ACTAGACACTGAGCATCCAG	4	RNA3	AD49ZG	RGEN-seq
chr0:71737191-71737210	71737193	31	31	antisense	NGG	GCCTATGCCTGAGCATGCAG	4	RNA3	AD49ZG	RGEN-seq
chr0:75460056-75460075	75460072	74	74	sense	NGG	ACGTATGTCTGAGCATCATG	5	RNA3	AD49ZG	RGEN-seq
chr0:78821286-78821305	78821288	51	51	antisense	NGG	AGCTGTGGCTGAGCACCCTG	4	RNA3	AD49ZG	RGEN-seq
chr0:84021139-84021158	84021155	183	182	sense	NGG	AGCTAAAACTGAGCATCCAG	4	RNA3	AD49ZG	RGEN-seq
chr0:84881788-84881807	84881790	263	263	antisense	NGG	TGTTGTGAATGAGCATCCAT	5	RNA3	AD49ZG	RGEN-seq
chr0:84949320-84949339	84949322	16	16	antisense	NGG	ACCTGTACCTAAGCATCACG	5	RNA3	AD49ZG	RGEN-seq
chr0:94499763-94499782	94499765	8	8	antisense	NGG	TTTTGTGACTGAGTATCAAG	5	RNA3	AD49ZG	RGEN-seq
chr0:96710486-96710505	96710488	24	23	antisense	NGG	AGCTGTAACTGAGCAGACAG	4	RNA3	AD49ZG	RGEN-seq
chr0:97926047-97926066	97926063	120	119	sense	NGG	ACCTTTTGATGAGCATCCAC	5	RNA3	AD49ZG	RGEN-seq
chr0:98033745-98033764	98033747	7	7	antisense	NGG	TCCTCTGACTGAACATACAT	5	RNA3	AD49ZG	RGEN-seq
chr0:100532807-100532826	100532809	5	5	antisense	NGG	ATCTAGGATTGAGCTTCCAG	5	RNA3	AD49ZG	RGEN-seq
chr0:101832286-101832305	101832302	185	184	sense	NGG	TCCTGTCACTGACCATCCAC	4	RNA3	AD49ZG	RGEN-seq
chr0:107693679-107693698	107693681	18	18	antisense	NGG	ACGAGTGCCTGAGCATCCAC	4	RNA3	AD49ZG	RGEN-seq
chr0:109919378-109919397	109919394	11	9	sense	NAG	AGCTCTGACTGAGTATCCTG	4	RNA3	AD49ZG	RGEN-seq
chr0:121487004-121487023	121487020	5	5	sense	NGG	ACTTGTGAACCAGCACCCAG	5	RNA3	AD49ZG	RGEN-seq
chr0:121927283-121927302	121927299	3	3	sense	NGG	AGCAGTGTGTGAGCTTCCAG	5	RNA3	AD49ZG	RGEN-seq
chr0:130609825-130609844	130609827	29	29	antisense	NGG	ACCTGTGTCTGACCATGCAG	3	RNA3	AD49ZG	RGEN-seq
chr0:133404187-133404206	133404189	272	271	antisense	NGG	ATCTGTGACAGGGCATCCAG	3	RNA3	AD49ZG	RGEN-seq
chr0:135893152-135893171	135893154	3	3	antisense	NGG	AACTGTGGCTAAGCAGCCAT	5	RNA3	AD49ZG	RGEN-seq
chr0:150693742-150693761	150693744	9	9	antisense	NAG	ATCTGTGACAGAGCATGCAG	3	RNA3	AD49ZG	RGEN-seq
chr0:151756046-151756065	151756048	7	7	antisense	NAG	TCCTGGGGATGACCATCCAG	5	RNA3	AD49ZG	RGEN-seq
chr0:152242477-152242496	152242479	19	19	antisense	NGG	CCATGTTAAGGAGCATCCAG	5	RNA3	AD49ZG	RGEN-seq
chr0:152478967-152478986	152478969	19	19	antisense	NGG	AGTTGTCACTCAGCATCCAT	5	RNA3	AD49ZG	RGEN-seq
chr0:156469858-156469877	156469874	72	71	sense	NGG	CCCTGGGACAGGGCATCCAG	4	RNA3	AD49ZG	RGEN-seq
chr0:158023729-158023748	158023745	19	19	sense	NGG	GCCTGGTACTGAGCACCCAA	5	RNA3	AD49ZG	RGEN-seq
chr0:161251063-161251082	161251065	40	40	antisense	NGG	TCGTCTGGCAGAGCATCCAG	5	RNA3	AD49ZG	RGEN-seq
chr0:169330738-169330757	169330754	188	188	sense	NGG	AGATGTAACTTAGCATCCAA	5	RNA3	AD49ZG	RGEN-seq
chr0:170249623-170249642	170249639	5	5	sense	NGG	AGCTATGGCTGAGCACCCTG	5	RNA3	AD49ZG	RGEN-seq
chr0:173036317-173036336	173036319	28	28	antisense	NGG	ACTTCTCCCTGAGCTTCCAG	5	RNA3	AD49ZG	RGEN-seq
chr0:177281024-177281043	177281026	8	8	antisense	NAG	ACCTGAGCCTTACCATCCAG	4	RNA3	AD49ZG	RGEN-seq
chr0:178391046-178391065	178391048	26	26	antisense	NGG	AGCTGAGGCCAAGCATCCAG	5	RNA3	AD49ZG	RGEN-seq
chr0:181542631-181542650	181542647	123	120	sense	NAG	ACCTGTGACTGAGCATTCAG	1	RNA3	AD49ZG	RGEN-seq
chr0:185539157-185539176	185539159	6	6	antisense	NAG	TCTTATGACTGAGCATCATG	5	RNA3	AD49ZG	RGEN-seq
chr0:185927083-185927102	185927085	22	22	antisense	NGG	TGCTGTGACAGAGTACCCAG	5	RNA3	AD49ZG	RGEN-seq
chr0:186687252-186687271	186687268	9	9	sense	NGG	ACCTAAGAGTGAGCATCCTT	5	RNA3	AD49ZG	RGEN-seq
chr0:187205322-187205341	187205338	4	4	sense	NAG	ACCTGTTATTAAACATCCAG	4	RNA3	AD49ZG	RGEN-seq
chr0:187513519-187513538	187513535	35	35	sense	NGG	ACCTATAACTGTTCATCTAG	5	RNA3	AD49ZG	RGEN-seq
chr0:188589050-188589069	188589066	4	4	sense	NGG	AATTGTGACTGAGTATTCAT	5	RNA3	AD49ZG	RGEN-seq
chr0:190402985-190403004	190403001	3	3	sense	NGG	ACCTCTCCCTGAACATACAG	5	RNA3	AD49ZG	RGEN-seq
chr0:197080017-197080036	197080033	30	29	sense	NAG	TCCTGCAACCCAGCATCCAG	5	RNA3	AD49ZG	RGEN-seq
chr0:208658315-208658334	208658331	85	85	sense	NGG	CCCTTTGTGTGAACATCCAG	5	RNA3	AD49ZG	RGEN-seq
chr0:220678138-220678157	220678140	267	237	antisense	NAG	TACTGTGACTAAGCATACAA	5	RNA3	AD49ZG	RGEN-seq
chr0:228834627-228834646	228834643	4	4	sense	NGG	TTCTTTGACTGAGTAGCCAG	5	RNA3	AD49ZG	RGEN-seq
chr0:230289302-230289321	230289318	7	7	sense	NGG	ACCAGAGACTGAAGATCCAG	4	RNA3	AD49ZG	RGEN-seq
chr0:238298326-238298345	238298342	14	14	sense	NGG	TCCTGTGACTCAGCATCAAC	4	RNA3	AD49ZG	RGEN-seq
chr0:242692680-242692699	242692682	70	69	antisense	NGG	ACCTGTGGTATAGCATCCAA	5	RNA3	AD49ZG	RGEN-seq
chr0:247731117-247731136	247731133	94	94	sense	NGG	GTCACTGACTGAGCTTCCAG	5	RNA3	AD49ZG	RGEN-seq
chr0:251805396-251805415	251805398	6	3	antisense	NGG	AGGTGGGACTGAGTGTCCAG	5	RNA3	AD49ZG	RGEN-seq
chr0:256427926-256427945	256427942	85	85	sense	NGG	CCATGTCCCTGACCATCCAG	5	RNA3	AD49ZG	RGEN-seq
chr0:258975036-258975055	258975052	132	132	sense	NGG	ACTTGTGGAAGAGCATCCAG	4	RNA3	AD49ZG	RGEN-seq
chr0:260278531-260278550	260278533	7	6	antisense	NAG	ACTTATGTCTAAGCATCCTG	5	RNA3	AD49ZG	RGEN-seq
chr0:261794335-261794354	261794351	13	13	sense	NGG	TCCTCTGACAGAACATCAAG	5	RNA3	AD49ZG	RGEN-seq
chr0:266408168-266408187	266408170	58	58	antisense	NGG	ACTTGATGCTGAGCACCCAG	5	RNA3	AD49ZG	RGEN-seq
chr0:266677483-266677502	266677485	29	29	antisense	NGG	AGATGTGAATGAGTATACAG	5	RNA3	AD49ZG	RGEN-seq
chr0:267398580-267398599	267398596	6	6	sense	NAG	CCCAATGGCTGACCATCCAG	5	RNA3	AD49ZG	RGEN-seq
chr0:267577816-267577835	267577818	224	220	antisense	NGG	CCCTGTTAATGAGCATCCAT	4	RNA3	AD49ZG	RGEN-seq
chr0:268835102-268835121	268835118	78	77	sense	NGG	GCTTTTGCCTGAACATCCAG	5	RNA3	AD49ZG	RGEN-seq
chr0:270707184-270707203	270707200	295	294	sense	NAG	TTTTGTGACTAAGCATCCAG	4	RNA3	AD49ZG	RGEN-seq
chr0:275384035-275384054	275384037	229	229	antisense	NAG	GGCTGTGTCTGAGCATCCAG	3	RNA3	AD49ZG	RGEN-seq
chr0:276764602-276764621	276764618	3	3	sense	NGG	ATCTGGGTCAGAGCTTCCAG	5	RNA3	AD49ZG	RGEN-seq
chr0:276846676-276846695	276846692	157	157	sense	NGG	ACCAGTGAATGAGCTACCAG	4	RNA3	AD49ZG	RGEN-seq
chr0:277832583-277832602	277832585	135	135	antisense	NGG	ACTAGAGACAGAACATCCAG	5	RNA3	AD49ZG	RGEN-seq
chr0:278922726-278922745	278922742	9	9	sense	NGG	ACCTGCTTCACAGCATCCAG	5	RNA3	AD49ZG	RGEN-seq
chr1:965812-965831	965814	281	280	antisense	NGG	AACTGTGAGAAAGCATCCAA	5	RNA3	AD49ZG	RGEN-seq
chr1:2613407-2613426	2613409	204	202	antisense	NGG	ATGTGTGTCTGAGCATCCAT	4	RNA3	AD49ZG	RGEN-seq
chr1:4943551-4943570	4943567	8	8	sense	NGG	AGCTGTGACTGAGAATCCCA	4	RNA3	AD49ZG	RGEN-seq
chr1:6776402-6776421	6776404	41	41	antisense	NGG	ACCTATGGAAGAGCAGCCAG	5	RNA3	AD49ZG	RGEN-seq
chr1:21218197-21218216	21218199	269	269	antisense	NGG	ATCTGTGTATGAGCATCCAG	3	RNA3	AD49ZG	RGEN-seq
chr1:33548911-33548930	33548927	34	34	sense	NAG	GTTTGTGACTAAGCATTCAG	5	RNA3	AD49ZG	RGEN-seq
chr1:40573539-40573558	40573555	279	279	sense	NGG	TCCTCTGACAGAGCATCAAG	4	RNA3	AD49ZG	RGEN-seq
chr1:40699817-40699836	40699833	3	3	sense	NGG	ACCTGTAGCTAATCATCTAG	5	RNA3	AD49ZG	RGEN-seq
chr1:42156115-42156134	42156117	4	3	antisense	NAG	AGAGGTGATTGAGCATACAG	5	RNA3	AD49ZG	RGEN-seq
chr1:42835908-42835927	42835910	7	7	antisense	NGG	ACTTATCACTGAGCACTCAG	5	RNA3	AD49ZG	RGEN-seq
chr1:46307644-46307663	46307660	19	19	sense	NGG	GCCTCTTTCTGAGCATCTAG	5	RNA3	AD49ZG	RGEN-seq
chr1:47438800-47438819	47438816	4	4	sense	NGG	ACCTGTGACTATAGCTCCAG	5	RNA3	AD49ZG	RGEN-seq
chr1:47709341-47709360	47709343	3	3	antisense	NAG	GCCTGTAACTCAGCCTCCAG	4	RNA3	AD49ZG	RGEN-seq
chr1:49438849-49438868	49438851	17	14	antisense	NGG	TCCTGTAACTGATAAACCAG	5	RNA3	AD49ZG	RGEN-seq
chr1:51810327-51810346	51810343	3	3	sense	NGG	ACCTGGCATGGAGAATCCAG	5	RNA3	AD49ZG	RGEN-seq
chr1:65818318-65818337	65818320	340	339	antisense	NAG	ACCTGTAATAAAGCATCCAG	4	RNA3	AD49ZG	RGEN-seq
chr1:67756944-67756963	67756946	6	6	antisense	NAG	TCTTAGGACTCAGCATCCAG	5	RNA3	AD49ZG	RGEN-seq
chr1:68599299-68599318	68599301	67	67	antisense	NAG	ATTTGTGACTGAGCACCCAG	3	RNA3	AD49ZG	RGEN-seq
chr1:73441043-73441062	73441045	21	21	antisense	NGG	ACCCTTAACTGAGCATCTAT	5	RNA3	AD49ZG	RGEN-seq
chr1:79759873-79759892	79759875	158	158	antisense	NGG	ACTTCTGTCTGAGCATCCAT	4	RNA3	AD49ZG	RGEN-seq
chr1:89656011-89656030	89656013	175	174	antisense	NAG	AACTGTAACTTAGCATCCAA	4	RNA3	AD49ZG	RGEN-seq
chr1:96163441-96163460	96163443	3	3	antisense	NAG	ATGTATGGCTGAGCATTCAG	5	RNA3	AD49ZG	RGEN-seq
chr1:99399249-99399268	99399251	52	52	antisense	NAG	CTTTATGGCTGAGCATCCAG	5	RNA3	AD49ZG	RGEN-seq
chr1:101599929-101599948	101599931	85	85	antisense	NAG	TTATGGGACTGAGCATCCAT	5	RNA3	AD49ZG	RGEN-seq
chr1:106661487-106661506	106661489	35	35	antisense	NGG	ACCTTGGCCAGACCATCCAG	5	RNA3	AD49ZG	RGEN-seq
chr1:108434263-108434282	108434279	122	122	sense	NGG	GGGTGAGACAGAGCATCCAG	5	RNA3	AD49ZG	RGEN-seq
chr1:109018221-109018240	109018223	4	4	antisense	NGG	ATCTGTCTCTGAACATCAAG	5	RNA3	AD49ZG	RGEN-seq
chr1:110117237-110117256	110117253	7	7	sense	NGG	AACTGTGACTGTTCATACAG	4	RNA3	AD49ZG	RGEN-seq
chr1:110378913-110378932	110378915	7	7	antisense	NAG	TCCTTTGAATAAACATCCAG	5	RNA3	AD49ZG	RGEN-seq
chr1:115028696-115028715	115028712	16	16	sense	NAG	TCAAGGGAGTGAGCATCCAG	5	RNA3	AD49ZG	RGEN-seq
chr1:118885097-118885116	118885113	3	3	sense	NGG	TCCTGTGAGTGAGCAGCCAT	4	RNA3	AD49ZG	RGEN-seq
chr1:121461012-121461031	121461014	42	42	antisense	NGG	ACCTCTGTAAGAGTATCCAG	5	RNA3	AD49ZG	RGEN-seq
chr1:121645278-121645297	121645280	11	11	antisense	NGG	TTCTGTTACTGAGTATTCAG	5	RNA3	AD49ZG	RGEN-seq
chr1:127724823-127724842	127724825	89	89	antisense	NGG	TACTATGACTGAGCATCCTT	5	RNA3	AD49ZG	RGEN-seq
chr1:130960888-130960907	130960904	7	7	sense	NGG	ACATGTGTCTCAGCATCCTA	5	RNA3	AD49ZG	RGEN-seq
chr1:141053240-141053259	141053256	3	3	sense	NGG	AGCACTGGCTGAGCTTCCAG	5	RNA3	AD49ZG	RGEN-seq
chr1:141206293-141206312	141206309	10	9	sense	NAG	AGGATTGACTGAGCATCCAT	5	RNA3	AD49ZG	RGEN-seq
chr1:142037189-142037208	142037191	82	82	antisense	NAG	ACTTAGGACTGAGCATCCAA	4	RNA3	AD49ZG	RGEN-seq
chr1:147205649-147205668	147205665	3	3	sense	NGG	ACCTCTGGAAGAGCAGCCAG	5	RNA3	AD49ZG	RGEN-seq
chr1:152939012-152939031	152939028	214	214	sense	NGG	ACCTCCCACTAAGCATCCAG	4	RNA3	AD49ZG	RGEN-seq
chr1:153002308-153002327	153002310	30	30	antisense	NAG	ACACAGCACTGAGCATCCAG	5	RNA3	AD49ZG	RGEN-seq
chr1:155124275-155124294	155124277	4	4	antisense	NGG	AACTGTGCCTGAGCTATCAG	5	RNA3	AD49ZG	RGEN-seq
chr1:158494559-158494578	158494561	229	229	antisense	NGG	ATCTAAGACTAAGAATCCAG	5	RNA3	AD49ZG	RGEN-seq
chr1:173884993-173885012	173884995	13	12	antisense	NGG	TCCTGTAACTCCACATCCAG	5	RNA3	AD49ZG	RGEN-seq
chr1:174055389-174055408	174055391	18	17	antisense	NGG	GCCTGGTACAGTGCATCCAG	5	RNA3	AD49ZG	RGEN-seq
chr1:175390157-175390176	175390173	30	25	sense	NAG	TTCTGTGAAGTAGCATCCAG	5	RNA3	AD49ZG	RGEN-seq
chr1:198320996-198321015	198320998	16	16	antisense	NAG	ACTCCTGCCAGAGCATCCAG	5	RNA3	AD49ZG	RGEN-seq
chr1:198339825-198339844	198339841	4	4	sense	NAG	TCTTGGCACTGGGCATCCAG	5	RNA3	AD49ZG	RGEN-seq
chr1:205848276-205848295	205848292	39	39	sense	NGG	GAATGTGTCAGAGCATCCAG	5	RNA3	AD49ZG	RGEN-seq
chr1:208122315-208122334	208122331	158	158	sense	NGG	ACCTATGACTGATCTTCCAG	3	RNA3	AD49ZG	RGEN-seq
chr1:212529726-212529745	212529728	156	156	antisense	NGG	TGGTGTGACTGTGCATCCTG	5	RNA3	AD49ZG	RGEN-seq
chr1:213962775-213962794	213962791	26	26	sense	NGG	ATCTGTTGGAGAGCATCCAG	5	RNA3	AD49ZG	RGEN-seq
chr1:217103240-217103259	217103242	31	31	antisense	NAG	TCAAATGCCTGAGCATCCAG	5	RNA3	AD49ZG	RGEN-seq
chr1:217243021-217243040	217243037	5	5	sense	NGG	ATCTTAGACTCAGCACCCAG	5	RNA3	AD49ZG	RGEN-seq
chr1:222597251-222597270	222597267	11	11	sense	NGG	AGCACTGACTGTTCATCCAG	5	RNA3	AD49ZG	RGEN-seq
chr1:226000651-226000670	226000667	18	18	sense	NAG	TCATTTGACTAAGCACCCAG	5	RNA3	AD49ZG	RGEN-seq
chr1:230331620-230331639	230331622	137	135	antisense	NGG	CCAGGTGACAGAGTATCCAG	5	RNA3	AD49ZG	RGEN-seq
chr1:236323343-236323362	236323359	164	164	sense	NGG	CCCTCTGCATGAGCATCCAT	5	RNA3	AD49ZG	RGEN-seq
chr1:238118969-238118988	238118985	56	56	sense	NGG	AACACAGGCTGAGCATCCAG	5	RNA3	AD49ZG	RGEN-seq
chr1:240485503-240485522	240485519	10	9	sense	NGG	CCCGGGGCCTGAGCCTCCAG	5	RNA3	AD49ZG	RGEN-seq
chr1:240736292-240736311	240736308	237	234	sense	NGG	GCCTTTAACTGAGCATACAG	4	RNA3	AD49ZG	RGEN-seq
chr1:255446960-255446979	255446976	16	13	sense	NAG	ACTGTTGACTGAGTATCTAG	5	RNA3	AD49ZG	RGEN-seq
chr1:256615485-256615504	256615487	82	81	antisense	NGG	ATCCGAGACTAAGTATCCAG	5	RNA3	AD49ZG	RGEN-seq
chr1:256851596-256851615	256851612	5	5	sense	NAG	ATCAGTGCTTGATCATCCAG	5	RNA3	AD49ZG	RGEN-seq
chr1:257878410-257878429	257878426	26	26	sense	NAG	ATTTATGACTGAGCATCCTG	4	RNA3	AD49ZG	RGEN-seq
chr1:263205686-263205705	263205688	224	224	antisense	NGG	GTCCCTGACTTAGCATCCAG	5	RNA3	AD49ZG	RGEN-seq
chr1:263421137-263421156	263421153	20	20	sense	NGG	CCCTGAGCCAGAGCACCCAG	5	RNA3	AD49ZG	RGEN-seq
chr1:264252579-264252598	264252581	194	194	antisense	NGG	AATTTGGACTGAGCATCCTG	5	RNA3	AD49ZG	RGEN-seq
chr1:270624059-270624078	270624061	48	47	antisense	NGG	CTCTGCGCCTGAGCATCTAG	5	RNA3	AD49ZG	RGEN-seq
chr1:277182788-277182807	277182804	100	99	sense	NGG	CTCTGTAACTGAGCCCCCAG	5	RNA3	AD49ZG	RGEN-seq
chr1:277729815-277729834	277729831	60	60	sense	NGG	CCATGTGCCTGAGCATACAT	5	RNA3	AD49ZG	RGEN-seq
chr1:279804524-279804543	279804526	222	222	antisense	NAG	TCTTGAGACTGAGCATCAAG	4	RNA3	AD49ZG	RGEN-seq
chr2:2359017-2359036	2359019	45	35	antisense	NGG	ACCTGTAACTAAGACTCCAG	4	RNA3	AD49ZG	RGEN-seq
chr2:6265116-6265135	6265132	9	8	sense	NAG	GCCTGAGGTTGAGCTTCCAG	5	RNA3	AD49ZG	RGEN-seq
chr2:7167598-7167617	7167614	234	234	sense	NGG	ACCCGAGACTGAACATCCTG	4	RNA3	AD49ZG	RGEN-seq
chr2:8022879-8022898	8022895	57	57	sense	NGG	ACTTGAGGCTGAGCATCCCA	5	RNA3	AD49ZG	RGEN-seq
chr2:8912209-8912228	8912211	77	77	antisense	NGG	ACACCGGAGTGAGCATCCAG	5	RNA3	AD49ZG	RGEN-seq
chr2:9671042-9671061	9671058	25	25	sense	NGG	CCAGGTGACTGAGCAGCCTG	5	RNA3	AD49ZG	RGEN-seq
chr2:10914411-10914430	10914427	3	3	sense	NGG	ACCTGTGCCTGGCATTCCAG	5	RNA3	AD49ZG	RGEN-seq
chr2:13723672-13723691	13723674	5	5	antisense	NGG	CCCTGTGAGGGAGCATCATG	5	RNA3	AD49ZG	RGEN-seq
chr2:17584407-17584426	17584423	9	9	sense	NGG	CCCTGTGGTTGAGCACCCTG	5	RNA3	AD49ZG	RGEN-seq
chr2:19941470-19941489	19941472	43	43	antisense	NGG	AGAAGTGAATGAGAATCCAG	5	RNA3	AD49ZG	RGEN-seq
chr2:20579656-20579675	20579672	60	60	sense	NGG	AGCTGTGGTTAAGCATCCTG	5	RNA3	AD49ZG	RGEN-seq
chr2:22230201-22230220	22230203	310	310	antisense	NGG	GAGGGTGACTCAGCATCCAG	5	RNA3	AD49ZG	RGEN-seq
chr2:23973946-23973965	23973962	18	18	sense	NGG	AGTTGGCACTTAGCATCCAG	5	RNA3	AD49ZG	RGEN-seq
chr2:25038933-25038952	25038949	149	149	sense	NGG	AACAGAGACTGAGAATCCAG	4	RNA3	AD49ZG	RGEN-seq
chr2:25073056-25073075	25073072	71	70	sense	NAG	ACCTCTGGCTGAGCATCCTG	3	RNA3	AD49ZG	RGEN-seq
chr2:25355899-25355918	25355915	39	39	sense	NAG	AGATGTGAAGGAGCATCCAG	4	RNA3	AD49ZG	RGEN-seq
chr2:35543947-35543966	35543949	33	33	antisense	NGG	ACAAATGCCTGAACATCCAG	5	RNA3	AD49ZG	RGEN-seq
chr2:41953807-41953826	41953809	5	5	antisense	NGG	ATCACTGACTGCTCATCCAG	5	RNA3	AD49ZG	RGEN-seq
chr2:53634740-53634759	53634756	175	174	sense	NGG	TCCTTTACCTGAGCATCCAT	5	RNA3	AD49ZG	RGEN-seq
chr2:54362320-54362339	54362322	25	25	antisense	NGG	AAGTGTGACTGACCACCCAA	5	RNA3	AD49ZG	RGEN-seq
chr2:63483768-63483787	63483770	5	5	antisense	NGG	ACCTAGGACATAGCACCCAG	5	RNA3	AD49ZG	RGEN-seq
chr2:63789870-63789889	63789886	262	262	sense	NGG	CCTCCTGACTGAGCATCCAA	5	RNA3	AD49ZG	RGEN-seq
chr2:76499386-76499405	76499402	3	3	sense	NGG	ACCTGTGAGAAGGCAACCAG	5	RNA3	AD49ZG	RGEN-seq
chr2:78984038-78984057	78984040	40	40	antisense	NAG	GGCTGTGACAAAACATCCAG	5	RNA3	AD49ZG	RGEN-seq
chr2:80173465-80173484	80173467	11	11	antisense	NAG	TCCTGTTACAAAGCATCCAA	5	RNA3	AD49ZG	RGEN-seq
chr2:81101095-81101114	81101111	8	8	sense	NGG	AGCTGTGACCCAGCACCCAG	4	RNA3	AD49ZG	RGEN-seq
chr2:81529207-81529226	81529223	166	166	sense	NGG	AGCTGGTACTAACCATCCAG	5	RNA3	AD49ZG	RGEN-seq
chr2:83495217-83495236	83495219	33	33	antisense	NGG	ACCTCTGAAACAGCATCCAG	4	RNA3	AD49ZG	RGEN-seq
chr2:84119229-84119248	84119245	67	66	sense	NGG	CTCTCTAACTGAGCATCCCG	5	RNA3	AD49ZG	RGEN-seq
chr2:90003679-90003698	90003695	13	13	sense	NAG	GAAAGTGACTGAGCATCAAG	5	RNA3	AD49ZG	RGEN-seq
chr2:96098794-96098813	96098796	36	26	antisense	NAG	CGCTGGAACTGAGCATACAG	5	RNA3	AD49ZG	RGEN-seq
chr2:97187509-97187528	97187525	53	53	sense	NAG	AACTAATACTGAACATCCAG	5	RNA3	AD49ZG	RGEN-seq
chr2:104308274-104308293	104308290	9	9	sense	NGG	AGCTGTGAGGGAGCATCAAG	4	RNA3	AD49ZG	RGEN-seq
chr2:104428051-104428070	104428053	3	3	antisense	NGG	ACTGGTGTCTGAGGATCCAG	4	RNA3	AD49ZG	RGEN-seq
chr2:106043711-106043730	106043713	20	19	antisense	NGG	CTCTGTGACTGAGCAGGCAG	4	RNA3	AD49ZG	RGEN-seq
chr2:107582817-107582836	107582833	30	30	sense	NGG	CCCAGGTACTCAGCATCCAG	5	RNA3	AD49ZG	RGEN-seq
chr2:111578799-111578818	111578815	4	4	sense	NGG	AGCACTGACTGCTCATCCAG	5	RNA3	AD49ZG	RGEN-seq
chr2:113437879-113437898	113437881	79	78	antisense	NGG	ATCTGTGACTAATCTTCCAG	4	RNA3	AD49ZG	RGEN-seq
chr2:116295959-116295978	116295975	3	3	sense	NAG	ATCTGTGTATGAGAATCCAG	4	RNA3	AD49ZG	RGEN-seq
chr2:129644450-129644469	129644466	6	6	sense	NGG	AGCACTGACTGCTCATCCAG	5	RNA3	AD49ZG	RGEN-seq
chr2:135348812-135348831	135348814	44	44	antisense	NAG	GCCACAGGCTGAGCATCCAG	5	RNA3	AD49ZG	RGEN-seq
chr2:144859534-144859553	144859536	35	35	antisense	NGG	AGGTATGACTGAGCATCCTT	5	RNA3	AD49ZG	RGEN-seq
chr2:150408255-150408274	150408257	155	155	antisense	NAG	ATCTAGGACTTAGCATCCAG	4	RNA3	AD49ZG	RGEN-seq
chr2:150413900-150413919	150413916	23	22	sense	NGG	AGCTGAGGCCAAGCATCCAG	5	RNA3	AD49ZG	RGEN-seq
chr2:152168092-152168111	152168108	5	5	sense	NGG	TCCTGGGACTGTCAATCCAG	5	RNA3	AD49ZG	RGEN-seq
chr2:155611480-155611499	155611496	7	7	sense	NGG	ACCTATTAGTGAGTATCCAT	5	RNA3	AD49ZG	RGEN-seq
chr2:161388114-161388133	161388130	149	149	sense	NGG	TGGTGTGAGTGAGCATCCAT	5	RNA3	AD49ZG	RGEN-seq
chr2:164618109-164618128	164618125	7	6	sense	NGG	AGCACTGACTGCTCATCCAG	5	RNA3	AD49ZG	RGEN-seq
chr2:166281702-166281721	166281704	3	3	antisense	NGG	ATCTGTAACTGAAGTTCCAG	5	RNA3	AD49ZG	RGEN-seq
chr2:173649608-173649627	173649610	61	60	antisense	NGG	ACCTGTAACTCCACATCCAG	4	RNA3	AD49ZG	RGEN-seq
chr2:173829302-173829321	173829318	5	5	sense	NAG	TGGTGTCACTCAGCATCCAG	5	RNA3	AD49ZG	RGEN-seq
chr2:174032174-174032193	174032190	108	108	sense	NGG	GTCTGTGTCTGAGCTTCCAG	4	RNA3	AD49ZG	RGEN-seq
chr2:178094779-178094798	178094795	141	138	sense	NAG	GCATATGACTCAGCATCCAA	5	RNA3	AD49ZG	RGEN-seq
chr2:194955982-194956001	194955984	3	3	antisense	NGG	CCCTGATACTGAGCATACAC	5	RNA3	AD49ZG	RGEN-seq
chr2:196674316-196674335	196674318	116	115	antisense	NGG	ACCTGTAACTGAGCTTCCAT	3	RNA3	AD49ZG	RGEN-seq
chr2:198145986-198146005	198145988	88	88	antisense	NGG	TCCCATCACTCAGCATCCAG	5	RNA3	AD49ZG	RGEN-seq
chr2:204873591-204873610	204873593	31	31	antisense	NGG	TCCTGAGACTGATCATCAAG	4	RNA3	AD49ZG	RGEN-seq
chr2:208347057-208347076	208347073	3	3	sense	NGG	AGCACTGACTGCTCATCCAG	5	RNA3	AD49ZG	RGEN-seq
chr2:208819286-208819305	208819302	94	94	sense	NGG	ACTTAGCACTGAGCACCCAG	5	RNA3	AD49ZG	RGEN-seq
chr2:216268071-216268090	216268073	37	37	antisense	NAG	ACTAGTGTGTAAGCATCCAG	5	RNA3	AD49ZG	RGEN-seq
chr2:220848873-220848892	220848875	13	13	antisense	NAG	ACATGTGACAGTCCATCCAG	4	RNA3	AD49ZG	RGEN-seq
chr2:232545418-232545437	232545434	33	33	sense	NGG	ACCTATGACAGAGCACCCAC	4	RNA3	AD49ZG	RGEN-seq
chr2:232990598-232990617	232990600	35	35	antisense	NGG	CCCATTGGCTGAGCATCCAA	5	RNA3	AD49ZG	RGEN-seq
chr2:235457940-235457959	235457942	4	4	antisense	NGG	GCCTGTAACTGAGGTTCCAG	4	RNA3	AD49ZG	RGEN-seq
chr2:239916020-239916039	239916022	6	6	antisense	NGG	CTCAGTGACTTAGCCTCCAG	5	RNA3	AD49ZG	RGEN-seq
chr2:241785859-241785878	241785875	71	71	sense	NGG	ACCTGTGCCAGTCCATCCAG	4	RNA3	AD49ZG	RGEN-seq
chr2:241893592-241893611	241893608	3	3	sense	NAG	ATCTGTGAGTGCTCATCCAG	4	RNA3	AD49ZG	RGEN-seq
chr2:241997748-241997767	241997750	11	11	antisense	NGG	TTCTGTGACTGGGGATCCAG	4	RNA3	AD49ZG	RGEN-seq
chr2:244136498-244136517	244136514	11	11	sense	NGG	CCCAGTGACTAAGCAACCAC	5	RNA3	AD49ZG	RGEN-seq
chr2:263051072-263051091	263051088	48	48	sense	NGG	AAAGGTGACTGAGTCTCCAG	5	RNA3	AD49ZG	RGEN-seq
chr2:265602904-265602923	265602906	102	102	antisense	NGG	CCCTGTGTTTCAGCATCCAG	4	RNA3	AD49ZG	RGEN-seq
chr2:269081108-269081127	269081124	5	5	sense	NAG	ATTTAGGACTGAGCATCCTG	5	RNA3	AD49ZG	RGEN-seq
chr2:271113961-271113980	271113963	3	3	antisense	NGG	TCCTGTAACTGTACCTCCAG	5	RNA3	AD49ZG	RGEN-seq
chr2:274229018-274229037	274229034	3	3	sense	NGG	ACCTCTAACTAAGCACCCAC	5	RNA3	AD49ZG	RGEN-seq
chr2:275958400-275958419	275958416	5	5	sense	NGG	ACCTGTCCCTGACCATCATG	5	RNA3	AD49ZG	RGEN-seq
chr2:293576975-293576994	293576977	8	8	antisense	NGG	ACTTGTGGCAAAGCTTCCAG	5	RNA3	AD49ZG	RGEN-seq
chr2:293612831-293612850	293612847	18	18	sense	NGG	ACCTGTAACTGGAGCTCCAG	5	RNA3	AD49ZG	RGEN-seq
chr2:300539925-300539944	300539927	6	6	antisense	NGG	GCCTGTGCAGGAGCATCCCG	5	RNA3	AD49ZG	RGEN-seq
chr2:302083549-302083568	302083565	33	33	sense	NAG	TCCTATGAATGAGCATTCAG	4	RNA3	AD49ZG	RGEN-seq
chr2:302419682-302419701	302419684	4	4	antisense	NAG	TTCTGTAACTCAGCCTCCAG	5	RNA3	AD49ZG	RGEN-seq
chr2:303418497-303418516	303418513	6	6	sense	NGG	AGCAATGACTGCTCATCCAG	5	RNA3	AD49ZG	RGEN-seq
chr2:304380941-304380960	304380957	57	57	sense	NGG	TTGTGTGACTGAGCATCCTT	5	RNA3	AD49ZG	RGEN-seq
chr2:306610674-306610693	306610690	4	4	sense	NGG	AACACTGACTGCTCATCCAG	5	RNA3	AD49ZG	RGEN-seq
chr2:307516686-307516705	307516688	7	7	antisense	NGG	ACCTCTGGATAAGCAACCAG	5	RNA3	AD49ZG	RGEN-seq
chr2:310115172-310115191	310115174	12	12	antisense	NGG	ACCATTGACTTAGCAACCAG	4	RNA3	AD49ZG	RGEN-seq
chr2:311200857-311200876	311200873	118	118	sense	NGG	GACTGTGGCTGAGTATCCTG	5	RNA3	AD49ZG	RGEN-seq
chr2:311919477-311919496	311919479	40	40	antisense	NGG	AGCACTGACTAAGCTTCCAG	5	RNA3	AD49ZG	RGEN-seq
chr2:312069191-312069210	312069193	3	3	antisense	NGG	CCCAGTGCCAGAGCAGCCAG	5	RNA3	AD49ZG	RGEN-seq
chr2:319042288-319042307	319042290	77	76	antisense	NAG	ACCAATGATTGAACATCCAG	4	RNA3	AD49ZG	RGEN-seq
chr2:319498469-319498488	319498485	93	93	sense	NAG	ATGACTGACTGAACATCCAG	5	RNA3	AD49ZG	RGEN-seq
chr2:321204839-321204858	321204855	5	5	sense	NGG	ATCTGTCACTGAGCCTCAAG	4	RNA3	AD49ZG	RGEN-seq
chr2:325328639-325328658	325328641	44	43	antisense	NGG	TCATGTGACTGAACATAAAG	5	RNA3	AD49ZG	RGEN-seq
chr2:327314913-327314932	327314915	429	429	antisense	NGG	TAGTGTGATTGAGCATCCAA	5	RNA3	AD49ZG	RGEN-seq
chr2:332350796-332350815	332350798	14	14	antisense	NAG	ACCAGGTTTTGAGCATCCAG	5	RNA3	AD49ZG	RGEN-seq
chr2:332364216-332364235	332364232	263	263	sense	NGG	AGGGGTGACTGAGCCTCCAG	4	RNA3	AD49ZG	RGEN-seq
chr2:335682762-335682781	335682764	5	5	antisense	NAG	ATGTGAGACAGAGCATCCTG	5	RNA3	AD49ZG	RGEN-seq
chr2:339497298-339497317	339497314	17	17	sense	NGG	ACCAGACACTGTACATCCAG	5	RNA3	AD49ZG	RGEN-seq
chr2:344212758-344212777	344212774	122	100	sense	NAG	CCTTATGACAGAGTATCCAG	5	RNA3	AD49ZG	RGEN-seq
chr2:345190880-345190899	345190882	158	158	antisense	NGG	TTCAGTGACTGAGCATGCAG	4	RNA3	AD49ZG	RGEN-seq
chr2:354885112-354885131	354885128	6	6	sense	NGG	ACCTCTGGAAGAGCAACCAG	5	RNA3	AD49ZG	RGEN-seq
chr2:360215530-360215549	360215532	10	10	antisense	NAG	AAGTGTGAGTAAGCATCCAT	5	RNA3	AD49ZG	RGEN-seq
chr2:362192335-362192354	362192351	56	56	sense	NGG	CCCAGTCACTGAGCATCTAG	4	RNA3	AD49ZG	RGEN-seq
chr2:363504498-363504517	363504514	9	9	sense	NGG	GACAGTGATGGAGCATCCAG	5	RNA3	AD49ZG	RGEN-seq
chr2:371116725-371116744	371116741	8	8	sense	NGG	AGCACTGGCTGCGCATCCAG	5	RNA3	AD49ZG	RGEN-seq
chr2:373240802-373240821	373240804	14	14	antisense	NAG	AATTGTGACTGAACACCCAG	4	RNA3	AD49ZG	RGEN-seq
chr2:374455191-374455210	374455193	6	6	antisense	NGG	ATCGGTCATTGAGCATTCAG	5	RNA3	AD49ZG	RGEN-seq
chr2:376814041-376814060	376814057	123	122	sense	NGG	TGTAGTGACTGATCATCCAG	5	RNA3	AD49ZG	RGEN-seq
chr2:380495148-380495167	380495164	217	216	sense	NAG	AATTGTAACCAAGCATCCAG	5	RNA3	AD49ZG	RGEN-seq
chr2:385329241-385329260	385329257	12	12	sense	NGG	AGCACTGACTGTTCATCCAG	5	RNA3	AD49ZG	RGEN-seq
chr2:390383393-390383412	390383395	5	4	antisense	NAG	TGCTGTGGCTGAGCAACCAG	4	RNA3	AD49ZG	RGEN-seq
chr2:391286533-391286552	391286535	134	133	antisense	NGG	ATGTGAAACTGGGCATCCAG	5	RNA3	AD49ZG	RGEN-seq
chr2:392860036-392860055	392860052	21	21	sense	NAG	CCATGGGCCTGAGCATCCAG	4	RNA3	AD49ZG	RGEN-seq
chr2:393588573-393588592	393588589	5	5	sense	NGG	ATTTGTGACTGCACTTCCAG	5	RNA3	AD49ZG	RGEN-seq
chr2:395665740-395665759	395665742	434	433	antisense	NGG	ATCTGTGTATGAGAATCCAG	4	RNA3	AD49ZG	RGEN-seq
chr2:403285656-403285675	403285672	62	62	sense	NGG	GTCAGTGACTGAGAGTCCAG	5	RNA3	AD49ZG	RGEN-seq
chr2:404018287-404018306	404018289	33	18	antisense	NAG	TGGTGTGACTGGGCTTCCAG	5	RNA3	AD49ZG	RGEN-seq
chr2:404028351-404028370	404028353	160	159	antisense	NGG	TCCTCTGAAAGAGCATCCAG	4	RNA3	AD49ZG	RGEN-seq
chr2:404341342-404341361	404341344	39	38	antisense	NGG	CCCTGTCTCTGAGCATCCCT	5	RNA3	AD49ZG	RGEN-seq
chr2:404737442-404737461	404737444	21	21	antisense	NGG	AGATGTATCTGAGCTTCCAG	5	RNA3	AD49ZG	RGEN-seq
chr2:409015872-409015891	409015888	25	25	sense	NGG	ACATGTGACTGTGCATAAAG	4	RNA3	AD49ZG	RGEN-seq
chr2:412406280-412406299	412406296	4	4	sense	NGG	ACATGAGGCTGGGCATCCTG	5	RNA3	AD49ZG	RGEN-seq
chr2:417198073-417198092	417198075	10	8	antisense	NAG	ATCTGTAATCCAGCATCCAG	5	RNA3	AD49ZG	RGEN-seq
chr2:423456214-423456233	423456216	203	203	antisense	NGG	TCTGGTGTCTAAGCATCCAG	5	RNA3	AD49ZG	RGEN-seq
chr2:429126075-429126094	429126091	102	102	sense	NGG	ACCTGAGCCAAAGCATCCAT	5	RNA3	AD49ZG	RGEN-seq
chr2:429482936-429482955	429482938	57	57	antisense	NGG	ACTTTGGACTGAGTATCCTG	5	RNA3	AD49ZG	RGEN-seq
chr2:434100334-434100353	434100350	74	74	sense	NGG	TCCTCTGCAAGAGCATCCAG	5	RNA3	AD49ZG	RGEN-seq
chr2:435126767-435126786	435126769	8	8	antisense	NAG	GCATTTGTCTGACCATCCAG	5	RNA3	AD49ZG	RGEN-seq
chr2:440564591-440564610	440564593	3	3	antisense	NAG	TTTTGTGGCTGAGCATTCAG	5	RNA3	AD49ZG	RGEN-seq
chr2:450352859-450352878	450352861	4	4	antisense	NGG	ACCTCTGGAAGAGCAGCCAG	5	RNA3	AD49ZG	RGEN-seq
chr2:450513072-450513091	450513088	65	48	sense	NAG	AGATGTAACTGAACTTCCAG	5	RNA3	AD49ZG	RGEN-seq
chr2:455148357-455148376	455148373	128	128	sense	NAG	ACATGTAACTAAGCATTCAG	4	RNA3	AD49ZG	RGEN-seq
chr2:455383767-455383786	455383769	20	19	antisense	NAG	ACTAGGGACCAAGCATCCAG	5	RNA3	AD49ZG	RGEN-seq
chr2:457304913-457304932	457304929	5	5	sense	NGG	AGCACTGGCTGCGCATCCAG	5	RNA3	AD49ZG	RGEN-seq
chr2:458457303-458457322	458457305	20	11	antisense	NGG	TCCTGTCACAAAGCCTCCAG	5	RNA3	AD49ZG	RGEN-seq
chr2:462109872-462109891	462109874	6	6	antisense	NGG	AGCCCTGGCTGAGCAGCCAG	5	RNA3	AD49ZG	RGEN-seq
chr2:463519892-463519911	463519908	3	3	sense	NGG	ACCTCTGGAAGAGCAGCCAG	5	RNA3	AD49ZG	RGEN-seq
chr3:480740-480759	480756	585	583	sense	NGG	CCATTAGACTGAGCATCCTG	5	RNA3	AD49ZG	RGEN-seq
chr3:2306136-2306155	2306138	5	5	antisense	NGG	GCATCTGACTGAGCCTCAAG	5	RNA3	AD49ZG	RGEN-seq
chr3:2865953-2865972	2865955	5	5	antisense	NGG	AGCTGTGATGGAGCCTCCAG	4	RNA3	AD49ZG	RGEN-seq
chr3:4218112-4218131	4218114	42	42	antisense	NGG	ACATGTGCTTCAGCATCCAT	5	RNA3	AD49ZG	RGEN-seq
chr3:4304838-4304857	4304840	450	449	antisense	NGG	ATCTGTAACAGAGCAACCAG	4	RNA3	AD49ZG	RGEN-seq
chr3:8808732-8808751	8808734	4	4	antisense	NGG	ACTGGTGAGTGAGCATTCTG	5	RNA3	AD49ZG	RGEN-seq
chr3:11741125-11741144	11741141	13	13	sense	NGG	ACCTGTGACTATAGATCCAG	4	RNA3	AD49ZG	RGEN-seq
chr3:16493828-16493847	16493830	122	122	antisense	NAG	ATTGCTGACTGAACATCCAG	5	RNA3	AD49ZG	RGEN-seq
chr3:20604492-20604511	20604494	39	39	antisense	NAG	TGCTCCTACTGAGCATCCAG	5	RNA3	AD49ZG	RGEN-seq
chr3:21076495-21076514	21076497	84	83	antisense	NGG	AGTTCTGACTGACCATCCTG	5	RNA3	AD49ZG	RGEN-seq
chr3:23082626-23082645	23082642	4	4	sense	NAG	AGCTGAGACCCAGCATCCAG	4	RNA3	AD49ZG	RGEN-seq
chr3:24097717-24097736	24097733	9	9	sense	NGG	AGCACTGGCTGAGCTTCCAG	5	RNA3	AD49ZG	RGEN-seq
chr3:26379661-26379680	26379677	13	11	sense	NGG	GTCTGTCCCGGAGCATCCAG	5	RNA3	AD49ZG	RGEN-seq
chr3:28810214-28810233	28810230	16	16	sense	NAG	ACCAATGATTAAGCATCCTG	5	RNA3	AD49ZG	RGEN-seq
chr3:28853185-28853204	28853187	38	38	antisense	NGG	ACCAGTGCCTAAGCACCCAA	5	RNA3	AD49ZG	RGEN-seq
chr3:30272338-30272357	30272354	160	160	sense	NGG	TGCTGTGAAAGACCATCCAG	5	RNA3	AD49ZG	RGEN-seq
chr3:30495530-30495549	30495532	45	45	antisense	NGG	GCCTGCTACCGAGCAACCAG	5	RNA3	AD49ZG	RGEN-seq
chr3:34235064-34235083	34235080	101	101	sense	NGG	CCTGGTCACTGAGCAGCCAG	5	RNA3	AD49ZG	RGEN-seq
chr3:37688533-37688552	37688535	41	41	antisense	NGG	AGCTGTGACTGTGCATTCAG	3	RNA3	AD49ZG	RGEN-seq
chr3:41425416-41425435	41425418	28	27	antisense	NAG	TCAGATGACTGAGCACCCAG	5	RNA3	AD49ZG	RGEN-seq
chr3:41466563-41466582	41466565	48	48	antisense	NGG	ACCTCAGAATGAACATCCAA	5	RNA3	AD49ZG	RGEN-seq
chr3:43241975-43241994	43241991	108	108	sense	NAG	AAGTGTGACTGAGCTACCAG	4	RNA3	AD49ZG	RGEN-seq
chr3:44889133-44889152	44889135	17	17	antisense	NAG	AAAGGTGACTGAACATCCTG	5	RNA3	AD49ZG	RGEN-seq
chr3:46106341-46106360	46106357	202	201	sense	NGG	AAATGTGACTGATCACCCAG	4	RNA3	AD49ZG	RGEN-seq
chr3:49702896-49702915	49702912	68	68	sense	NGG	ACAGGATCCTGAGCATCCAG	5	RNA3	AD49ZG	RGEN-seq
chr3:52062186-52062205	52062188	5	5	antisense	NGG	ACCTGTAACTTAGTTTCCAG	4	RNA3	AD49ZG	RGEN-seq
chr3:56696646-56696665	56696648	104	104	antisense	NGG	ACCTGGAAGTGAGCATCCTG	4	RNA3	AD49ZG	RGEN-seq
chr3:57126017-57126036	57126019	58	58	antisense	NAG	GCCAAGGACTGAGCATCCAT	5	RNA3	AD49ZG	RGEN-seq
chr3:58095293-58095312	58095295	28	28	antisense	NGG	ACCTCTTACTGAACAACCAG	4	RNA3	AD49ZG	RGEN-seq
chr3:62380165-62380184	62380181	3	3	sense	NGG	ACCTGTAACTGAGTCTTCAG	4	RNA3	AD49ZG	RGEN-seq
chr3:70511790-70511809	70511792	125	124	antisense	NGG	ATATGTGAATGAAAATCCAG	5	RNA3	AD49ZG	RGEN-seq
chr3:73097624-73097643	73097626	6	6	antisense	NAG	GCCTGGGTCTGAGCATCCAA	4	RNA3	AD49ZG	RGEN-seq
chr3:74281368-74281387	74281384	5	4	sense	NAG	ATCTGTTACTGAGTATCAAA	5	RNA3	AD49ZG	RGEN-seq
chr3:74740150-74740169	74740152	109	109	antisense	NAG	ACACAACACTGAGCATCCAG	5	RNA3	AD49ZG	RGEN-seq
chr3:75195029-75195048	75195031	12	12	antisense	NGG	AGCAATGACTGATCATCAAG	5	RNA3	AD49ZG	RGEN-seq
chr3:93307942-93307961	93307958	42	42	sense	NGG	GCCTGTTACTGAAGATCCAG	4	RNA3	AD49ZG	RGEN-seq
chr3:93861976-93861995	93861978	291	291	antisense	NGG	AAATGTGACTGAAAATCCAG	4	RNA3	AD49ZG	RGEN-seq
chr3:102030942-102030961	102030944	10	10	antisense	NAG	ACTTGTATTGGAGCATCCAG	5	RNA3	AD49ZG	RGEN-seq
chr3:105815792-105815811	105815808	113	113	sense	NGG	ACAATTAACTGAGCATCCAC	5	RNA3	AD49ZG	RGEN-seq
chr3:107433898-107433917	107433914	9	9	sense	NAG	GTCTTAGACTGAGCATACAG	5	RNA3	AD49ZG	RGEN-seq
chr3:108091822-108091841	108091838	7	7	sense	NGG	GCCACTGACTGACCGTCCAG	5	RNA3	AD49ZG	RGEN-seq
[truncated: 2,452 more rows]

## Sheet: AD49ZG_exp2
Chr:Start-End	Cutsite	Score	Cutsite Ends	Strand	PAM	Guide sequence	Mismatches	sgRNA	Cell line	Method
chr0:790473-790492	790475	6	6	antisense	NAG	GCCAGGGAAGAGAGTGACCT	5	RNA1	AD49ZG	RGEN-seq
chr0:1020341-1020360	1020357	25	24	sense	NAG	GGCTTTGAACAGAGTGAACG	5	RNA1	AD49ZG	RGEN-seq
chr0:4012686-4012705	4012688	14	13	antisense	NGG	GTCCTGGAACAGAGGGAACG	5	RNA1	AD49ZG	RGEN-seq
chr0:5793472-5793491	5793474	8	8	antisense	NGG	GTGGGGGAGCAGAGTGAAGG	5	RNA1	AD49ZG	RGEN-seq
chr0:14908630-14908649	14908646	178	178	sense	NGG	GGGAGGCAGCAGAGTAACCG	4	RNA1	AD49ZG	RGEN-seq
chr0:19422886-19422905	19422888	5	4	antisense	NAG	AGGTGGGAACAGTGTGAACA	5	RNA1	AD49ZG	RGEN-seq
chr0:21365693-21365712	21365695	10	10	antisense	NAG	CGGGGGGAATGGAGAGACCG	5	RNA1	AD49ZG	RGEN-seq
chr0:24213283-24213302	24213299	10	10	sense	NGG	GGGGGGGTGCAGTGTGACCC	5	RNA1	AD49ZG	RGEN-seq
chr0:26308973-26308992	26308975	24	18	antisense	NAG	TGGAGGGAAGCTAGTGACCG	5	RNA1	AD49ZG	RGEN-seq
chr0:29330003-29330022	29330005	277	271	antisense	NGG	AGGAAAGAACAGACTGACCG	5	RNA1	AD49ZG	RGEN-seq
chr0:31899165-31899184	31899181	3	3	sense	NGG	GGAGGGGAACAGAGAGAGAG	5	RNA1	AD49ZG	RGEN-seq
chr0:48356671-48356690	48356673	60	57	antisense	NAG	TTGCAGGAACAGACTGACCC	5	RNA1	AD49ZG	RGEN-seq
chr0:51606156-51606175	51606172	17	17	sense	NGG	AGGAGGGAACTGAGTGTCCT	5	RNA1	AD49ZG	RGEN-seq
chr0:51610762-51610781	51610764	16	15	antisense	NGG	AGGAGGGAACTGAGTGTCCT	5	RNA1	AD49ZG	RGEN-seq
chr0:54717241-54717260	54717243	12	12	antisense	NGG	TGGTGGGAACAGAGTTTCCA	5	RNA1	AD49ZG	RGEN-seq
chr0:56046741-56046760	56046757	29	27	sense	NGG	GGCAGGGCACAGAGGGACTG	5	RNA1	AD49ZG	RGEN-seq
chr0:59680087-59680106	59680103	33	33	sense	NGG	GGGCACGGTCAGAGTGACCT	5	RNA1	AD49ZG	RGEN-seq
chr0:63757880-63757899	63757882	64	63	antisense	NAG	GGGTGGAGACAGAATGACCT	5	RNA1	AD49ZG	RGEN-seq
chr0:64582780-64582799	64582796	6	6	sense	NGG	GGACTGGAGCAGAGGGACAG	5	RNA1	AD49ZG	RGEN-seq
chr0:84163808-84163827	84163810	125	124	antisense	NGG	TGGTGGGAACGGAGCGACCC	5	RNA1	AD49ZG	RGEN-seq
chr0:88643881-88643900	88643897	41	40	sense	NGG	CTGATGGAATAGAGTGACCG	5	RNA1	AD49ZG	RGEN-seq
chr0:89438497-89438516	89438513	151	150	sense	NGG	GGGGAGGGACAGAAAGACCG	5	RNA1	AD49ZG	RGEN-seq
chr0:89532058-89532077	89532074	4	4	sense	NGG	GGAGGGGAACAGTGGGACAG	5	RNA1	AD49ZG	RGEN-seq
chr0:90170765-90170784	90170767	14	14	antisense	NAG	TGGCTGGGACAGAGTGACAG	4	RNA1	AD49ZG	RGEN-seq
chr0:97594675-97594694	97594677	5	3	antisense	NAG	GGGAAGGAACAGAGAGATAG	5	RNA1	AD49ZG	RGEN-seq
chr0:98972203-98972222	98972205	256	255	antisense	NGG	GTGTGGGAGCAGAGGGACCT	5	RNA1	AD49ZG	RGEN-seq
chr0:100483653-100483672	100483655	61	54	antisense	NAG	GGGGGAGTACACAGTGACAG	5	RNA1	AD49ZG	RGEN-seq
chr0:101188689-101188708	101188705	340	176	sense	NAG	GGGAGAGAAGAGAGTGACAG	4	RNA1	AD49ZG	RGEN-seq
chr0:121048469-121048488	121048485	37	37	sense	NGG	TGGTGGGAACAGAGTGGATG	5	RNA1	AD49ZG	RGEN-seq
chr0:123115981-123116000	123115997	4	4	sense	NAG	GGAGGGCCACAGAGTGACCG	4	RNA1	AD49ZG	RGEN-seq
chr0:123511820-123511839	123511836	45	44	sense	NAG	GGAAGAGAACAGGGAGACCG	5	RNA1	AD49ZG	RGEN-seq
chr0:126137160-126137179	126137162	150	144	antisense	NAG	GGGAGGGGACAGAGTCACCT	4	RNA1	AD49ZG	RGEN-seq
chr0:126582028-126582047	126582044	154	151	sense	NGG	GGGTGGGAACATAGAGACAG	4	RNA1	AD49ZG	RGEN-seq
chr0:133998654-133998673	133998656	7	4	antisense	NAG	GGGAGAAAAGAGAGTGACAG	5	RNA1	AD49ZG	RGEN-seq
chr0:154443825-154443844	154443827	3	3	antisense	NAG	TGGGGGGAACACAGTGATTG	5	RNA1	AD49ZG	RGEN-seq
chr0:165055650-165055669	165055652	125	124	antisense	NAG	GGGCAGCAACAGAGAGACCA	4	RNA1	AD49ZG	RGEN-seq
chr0:175466339-175466358	175466355	186	184	sense	NAG	GGGAAGAAACAGAGTGACCT	4	RNA1	AD49ZG	RGEN-seq
chr0:175625114-175625133	175625130	3	3	sense	NGG	GGGCGTGGTCAGAGTGACAT	5	RNA1	AD49ZG	RGEN-seq
chr0:177601229-177601248	177601231	149	149	antisense	NGG	AGCCGGGGACAGAAAGACCG	5	RNA1	AD49ZG	RGEN-seq
chr0:178904186-178904205	178904202	241	240	sense	NGG	GGAAGGGAACAGAGCGACCA	4	RNA1	AD49ZG	RGEN-seq
chr0:181531297-181531316	181531299	68	61	antisense	NGG	CAGCAGGAAGAGAGTGACAG	5	RNA1	AD49ZG	RGEN-seq
chr0:185764645-185764664	185764647	202	201	antisense	NGG	GGGGAGGAACAGAGTAGCCA	5	RNA1	AD49ZG	RGEN-seq
chr0:189516693-189516712	189516709	205	205	sense	NGG	GGGAGGGTATAGAGAGACAG	5	RNA1	AD49ZG	RGEN-seq
chr0:196793864-196793883	196793880	137	129	sense	NGG	GGGAGGGTACAGAGTGGACA	5	RNA1	AD49ZG	RGEN-seq
chr0:197958904-197958923	197958920	137	103	sense	NAG	GGACACGAACAGAGTAACAG	5	RNA1	AD49ZG	RGEN-seq
chr0:209716756-209716775	209716772	210	209	sense	NGG	GGGTAGCAACAGAGAGACTG	5	RNA1	AD49ZG	RGEN-seq
chr0:215471600-215471619	215471616	8	5	sense	NGG	GGGAGGGAAGAGAGTGATGG	4	RNA1	AD49ZG	RGEN-seq
chr0:215485432-215485451	215485434	14	14	antisense	NGG	GGACAGGAAAAGTGTGTCCG	5	RNA1	AD49ZG	RGEN-seq
chr0:249349849-249349868	249349851	10	9	antisense	NAG	GTGGGGAGACAGAGTGACCC	5	RNA1	AD49ZG	RGEN-seq
chr0:255168086-255168105	255168088	3	3	antisense	NGG	GGTCGGGAACAAAGTGGACC	5	RNA1	AD49ZG	RGEN-seq
chr0:255485978-255485997	255485980	7	7	antisense	NGG	GGGCGGTATCAGAATGTCCT	5	RNA1	AD49ZG	RGEN-seq
chr0:264368083-264368102	264368085	183	182	antisense	NGG	GGACGAGCACAGAAAGACCG	5	RNA1	AD49ZG	RGEN-seq
chr0:265939323-265939342	265939325	27	26	antisense	NAG	GAGAGGGAAAAGAGTGACAT	5	RNA1	AD49ZG	RGEN-seq
chr0:268689366-268689385	268689368	307	307	antisense	NGG	GGGAAGGCACAGAGAGACTG	5	RNA1	AD49ZG	RGEN-seq
chr0:270674163-270674182	270674179	7	7	sense	NGG	GGGCGGGAGCAGAGGGAGCG	3	RNA1	AD49ZG	RGEN-seq
chr0:276882880-276882899	276882882	15	12	antisense	NGG	GGGCGTGGTCAGGGTGACCT	5	RNA1	AD49ZG	RGEN-seq
chr0:277678405-277678424	277678407	4	3	antisense	NGG	GGGCAGGGACAGGATGACTG	5	RNA1	AD49ZG	RGEN-seq
chr0:279118464-279118483	279118480	28	27	sense	NGG	GGCCAGGAACAGAGAGATTG	5	RNA1	AD49ZG	RGEN-seq
chr0:279735071-279735090	279735087	133	130	sense	NGG	TGGCTGGAATAGAGTGATCA	5	RNA1	AD49ZG	RGEN-seq
chr1:4876572-4876591	4876588	91	91	sense	NAG	AGGTGTGAACATAGTGACCA	5	RNA1	AD49ZG	RGEN-seq
chr1:5629522-5629541	5629524	239	235	antisense	NGG	GGAGGGGGACAGAGAGACAG	5	RNA1	AD49ZG	RGEN-seq
chr1:7707500-7707519	7707502	6	5	antisense	NAG	GTGTGGGCACAGAATGACAG	5	RNA1	AD49ZG	RGEN-seq
chr1:10595639-10595658	10595641	74	72	antisense	NGG	GGGGAGGAAGAGAGGGACCT	5	RNA1	AD49ZG	RGEN-seq
chr1:14156728-14156747	14156730	108	105	antisense	NGG	GCGCAGGACCAGAGAGATCG	5	RNA1	AD49ZG	RGEN-seq
chr1:16395045-16395064	16395047	118	116	antisense	NGG	GGGGTGGAGCAGAGGGACCA	5	RNA1	AD49ZG	RGEN-seq
chr1:21695557-21695576	21695573	214	210	sense	NGG	CAGAGGGAACAGACTGACCA	5	RNA1	AD49ZG	RGEN-seq
chr1:23452885-23452904	23452901	80	78	sense	NGG	GGCAGGGAGCAGAGTGATCC	5	RNA1	AD49ZG	RGEN-seq
chr1:37090992-37091011	37091008	10	10	sense	NGG	GGGAGAGGACAGAGTCACTG	5	RNA1	AD49ZG	RGEN-seq
chr1:56779213-56779232	56779229	249	247	sense	NGG	GGAAGGGAAAAGAGTCACCT	5	RNA1	AD49ZG	RGEN-seq
chr1:62146356-62146375	62146372	9	9	sense	NGG	GGGCTGGTACACAGTGACAA	5	RNA1	AD49ZG	RGEN-seq
chr1:63726270-63726289	63726272	156	154	antisense	NGG	GGTAGGGATCAGTGTGACCT	5	RNA1	AD49ZG	RGEN-seq
chr1:70591018-70591037	70591034	223	221	sense	NAG	TGGCAGTCACAAAGTGACCG	5	RNA1	AD49ZG	RGEN-seq
chr1:71359041-71359060	71359043	31	31	antisense	NGG	GGGGGGGGACAGAGAAACAG	5	RNA1	AD49ZG	RGEN-seq
chr1:71365717-71365736	71365733	3	3	sense	NGG	GGGAGGGGGCAGAGTGAGAG	5	RNA1	AD49ZG	RGEN-seq
chr1:77589145-77589164	77589147	5	5	antisense	NGG	GGGTGGGAACAGACTATCCT	5	RNA1	AD49ZG	RGEN-seq
chr1:77923131-77923150	77923147	225	225	sense	NGG	AGGCAGGGACAGAGTGACAA	5	RNA1	AD49ZG	RGEN-seq
chr1:78161648-78161667	78161650	20	20	antisense	NAG	GATAGGGAACAGGGTGACTG	5	RNA1	AD49ZG	RGEN-seq
chr1:78799734-78799753	78799736	105	105	antisense	NGG	TGGGGAGAGCAGAGTGACAG	5	RNA1	AD49ZG	RGEN-seq
chr1:88234079-88234098	88234081	158	157	antisense	NGG	GGGAGAGTCCAGAGTGAACG	5	RNA1	AD49ZG	RGEN-seq
chr1:92141677-92141696	92141679	38	38	antisense	NGG	AGGTGGGAACAGAGAGACTT	5	RNA1	AD49ZG	RGEN-seq
chr1:98637338-98637357	98637340	12	12	antisense	NAG	GGTGTGGAGCAGAGTGACCT	5	RNA1	AD49ZG	RGEN-seq
chr1:101444256-101444275	101444258	5	5	antisense	NGG	GGGGGGCAACAGACAGACAG	5	RNA1	AD49ZG	RGEN-seq
chr1:103005227-103005246	103005243	185	183	sense	NGG	ATGCAGGAACATAGTGAACG	5	RNA1	AD49ZG	RGEN-seq
chr1:103685229-103685248	103685231	8	7	antisense	NAG	TGGCAAGAACAGAGAGACAG	5	RNA1	AD49ZG	RGEN-seq
chr1:113509044-113509063	113509046	23	23	antisense	NAG	GGGAGGGACCAGAGTGAACA	4	RNA1	AD49ZG	RGEN-seq
chr1:113557969-113557988	113557985	35	35	sense	NGG	GCGAGTGAACAGAGAGACCT	5	RNA1	AD49ZG	RGEN-seq
chr1:116348145-116348164	116348161	45	45	sense	NGG	GGAAGAGAACAGAGAGACAG	5	RNA1	AD49ZG	RGEN-seq
chr1:116902395-116902414	116902411	337	336	sense	NGG	GGGAGGGGACAGAATGACAG	4	RNA1	AD49ZG	RGEN-seq
chr1:120093557-120093576	120093559	68	67	antisense	NGG	GTGAGGGAACACAGAGACAG	5	RNA1	AD49ZG	RGEN-seq
chr1:125441182-125441201	125441198	5	5	sense	NGG	GGTAGGGGACAGAGGGAGCG	5	RNA1	AD49ZG	RGEN-seq
chr1:137161581-137161600	137161583	58	53	antisense	NGG	GGGGGGAAAGAGAGAGACCA	5	RNA1	AD49ZG	RGEN-seq
chr1:140256037-140256056	140256053	77	69	sense	NAG	GGAGTGGCACAGAGTGACAG	5	RNA1	AD49ZG	RGEN-seq
chr1:143366802-143366821	143366818	17	16	sense	NGG	GGGAGGGCACAGAGTGAGAG	4	RNA1	AD49ZG	RGEN-seq
chr1:152934167-152934186	152934183	7	7	sense	NGG	GGGTGGGACCAGAGTGCCCC	4	RNA1	AD49ZG	RGEN-seq
chr1:160018968-160018987	160018970	318	315	antisense	NGG	AGGCAAGGACAGAGGGACCG	5	RNA1	AD49ZG	RGEN-seq
chr1:163611381-163611400	163611397	145	145	sense	NGG	GTGAGGGAACAGAGAGCCCT	5	RNA1	AD49ZG	RGEN-seq
chr1:163642772-163642791	163642788	8	8	sense	NAG	GGGCATGAACAGAGTGACAA	4	RNA1	AD49ZG	RGEN-seq
chr1:168179103-168179122	168179119	68	68	sense	NGG	GGGGGGAGACAGAGAGACAG	5	RNA1	AD49ZG	RGEN-seq
chr1:173463941-173463960	173463957	3	3	sense	NGG	GTGCAGGAAGAGACTGACTG	5	RNA1	AD49ZG	RGEN-seq
chr1:189304110-189304129	189304112	8	8	antisense	NAG	GGGCAGGGCCAGAGTGACAG	4	RNA1	AD49ZG	RGEN-seq
chr1:198041536-198041555	198041552	13	13	sense	NAG	GGTAAAGGACAGAGTGACCG	5	RNA1	AD49ZG	RGEN-seq
chr1:199766426-199766445	199766442	169	166	sense	NGG	GGGGAGAAACAGAGTGATCA	5	RNA1	AD49ZG	RGEN-seq
chr1:204301202-204301221	204301204	307	306	antisense	NGG	GGGCAGAAACAAAGTGAATG	5	RNA1	AD49ZG	RGEN-seq
chr1:208098616-208098635	208098632	117	115	sense	NGG	GAGGGGGGACAGAGGGACAG	5	RNA1	AD49ZG	RGEN-seq
chr1:210337909-210337928	210337911	309	305	antisense	NAG	TGGCAGGAGCAGAGTGACCT	4	RNA1	AD49ZG	RGEN-seq
chr1:215315196-215315215	215315198	141	132	antisense	NGG	TGGCAGGAAGAGAGTGAACT	5	RNA1	AD49ZG	RGEN-seq
chr1:217237824-217237843	217237826	4	4	antisense	NGG	GGGCAGGAAAAGGGTGTCCA	5	RNA1	AD49ZG	RGEN-seq
chr1:217883374-217883393	217883376	5	4	antisense	NGG	AGGAGGGAACAGTGTGAGCA	5	RNA1	AD49ZG	RGEN-seq
chr1:218408322-218408341	218408324	239	238	antisense	NGG	GAGTGGGAACAGAGAAACAG	5	RNA1	AD49ZG	RGEN-seq
chr1:220069161-220069180	220069177	157	140	sense	NGG	TACCTGGAACAGAGTGACCT	5	RNA1	AD49ZG	RGEN-seq
chr1:220363398-220363417	220363414	146	144	sense	NAG	GGACAGGAACAAAGTGACAG	4	RNA1	AD49ZG	RGEN-seq
chr1:220964335-220964354	220964351	6	6	sense	NAG	TTGCAGGAACAGAGTCACCA	5	RNA1	AD49ZG	RGEN-seq
chr1:222658977-222658996	222658993	13	13	sense	NGG	GGTCATGAAAAGAGTGACCA	5	RNA1	AD49ZG	RGEN-seq
chr1:234153120-234153139	234153136	161	159	sense	NAG	AGGCAGGGACAGAGTGAACA	5	RNA1	AD49ZG	RGEN-seq
chr1:238085361-238085380	238085363	3	3	antisense	NGG	GGGCGCAACCAGAGAGACAG	5	RNA1	AD49ZG	RGEN-seq
chr1:238658647-238658666	238658663	65	53	sense	NAG	GGGCTTGAATAGAGTGACAG	4	RNA1	AD49ZG	RGEN-seq
chr1:247387197-247387216	247387213	157	144	sense	NAG	TGGAGGAGACAGACTGACCG	5	RNA1	AD49ZG	RGEN-seq
chr1:247974357-247974376	247974359	322	317	antisense	NGG	TGGAGAGAACAGAGTGACTA	5	RNA1	AD49ZG	RGEN-seq
chr1:252671807-252671826	252671809	37	28	antisense	NGG	GGGTGGAAAGGGAGTGACCA	5	RNA1	AD49ZG	RGEN-seq
chr1:256214658-256214677	256214660	90	89	antisense	NAG	CAGTGGGAACACAGTGACAG	5	RNA1	AD49ZG	RGEN-seq
chr1:256425325-256425344	256425327	59	58	antisense	NGG	GTCCATGAACAGAGTGACCA	5	RNA1	AD49ZG	RGEN-seq
chr1:259073240-259073259	259073256	131	131	sense	NGG	TGGCTGGAACAAAGTTACCT	5	RNA1	AD49ZG	RGEN-seq
chr1:260416663-260416682	260416679	383	380	sense	NGG	GCAAGGGAACAGAGGGACCA	5	RNA1	AD49ZG	RGEN-seq
chr1:262346827-262346846	262346829	91	88	antisense	NAG	GGCTAGGGACAGAGTGACAG	5	RNA1	AD49ZG	RGEN-seq
chr1:263563878-263563897	263563894	18	18	sense	NGG	GGGAGGGGACACAGTGTCTG	5	RNA1	AD49ZG	RGEN-seq
chr1:269562813-269562832	269562815	88	55	antisense	NAG	GTGGGGGAAACAAGTGACCG	5	RNA1	AD49ZG	RGEN-seq
chr1:269931818-269931837	269931820	7	7	antisense	NAG	GGGAGGGGACAGAGTTCCCG	4	RNA1	AD49ZG	RGEN-seq
chr1:274685546-274685565	274685562	6	6	sense	NAG	TGGGGTGAACAGGGTGACCA	5	RNA1	AD49ZG	RGEN-seq
chr2:1291689-1291708	1291691	364	352	antisense	NGG	GGGAAGGAACAGAGGGACAG	4	RNA1	AD49ZG	RGEN-seq
chr2:8853641-8853660	8853643	19	17	antisense	NAG	GAGCGTGGACAAAGTGACCA	5	RNA1	AD49ZG	RGEN-seq
chr2:18971189-18971208	18971191	247	246	antisense	NGG	CCTAGGGAACAGAGTGACAG	5	RNA1	AD49ZG	RGEN-seq
chr2:19215387-19215406	19215389	22	22	antisense	NAG	TGGCAGGAACAGTGTGACTG	4	RNA1	AD49ZG	RGEN-seq
chr2:25050377-25050396	25050379	75	75	antisense	NGG	GGGCAGGAACTGTGTGACCT	4	RNA1	AD49ZG	RGEN-seq
chr2:30070092-30070111	30070094	65	57	antisense	NGG	GGGTGGGAGAAGAGTGAACT	5	RNA1	AD49ZG	RGEN-seq
chr2:31807860-31807879	31807862	135	134	antisense	NAG	AGGAGGAAACAGAATGACCA	5	RNA1	AD49ZG	RGEN-seq
chr2:35302895-35302914	35302897	126	126	antisense	NAG	CACTGGGAACAGAGTGACCC	5	RNA1	AD49ZG	RGEN-seq
chr2:53388825-53388844	53388827	56	56	antisense	NGG	GGGAGGAAACACGGTGACCC	5	RNA1	AD49ZG	RGEN-seq
chr2:53453274-53453293	53453290	4	4	sense	NGG	GTGGGAGAGCAGAGTGACCC	5	RNA1	AD49ZG	RGEN-seq
chr2:54077603-54077622	54077619	42	42	sense	NGG	GGGAGCAATCAGAGTGACCT	5	RNA1	AD49ZG	RGEN-seq
chr2:57102176-57102195	57102192	51	50	sense	NGG	AGCGGGGAACAGAGAGACGG	5	RNA1	AD49ZG	RGEN-seq
chr2:58578009-58578028	58578025	8	8	sense	NGG	AGGCCGGAAGAGGGTGACCA	5	RNA1	AD49ZG	RGEN-seq
chr2:64285820-64285839	64285836	4	4	sense	NGG	AGGCGAGAAGAGCGTGACCA	5	RNA1	AD49ZG	RGEN-seq
chr2:66456422-66456441	66456424	323	320	antisense	NGG	GGTCAGGTACAGAGGGACCA	5	RNA1	AD49ZG	RGEN-seq
chr2:70500867-70500886	70500869	4	4	antisense	NGG	AGGAGGGAACAGAGACACTG	5	RNA1	AD49ZG	RGEN-seq
chr2:77932140-77932159	77932142	14	14	antisense	NAG	GGGTAGGAAGAGAGTAACCT	5	RNA1	AD49ZG	RGEN-seq
chr2:81247531-81247550	81247547	16	14	sense	NGG	GGGCCAGAACATAGTGACAA	5	RNA1	AD49ZG	RGEN-seq
chr2:89029427-89029446	89029443	16	15	sense	NGG	GGGGAGGGGCAGAGTGACAG	5	RNA1	AD49ZG	RGEN-seq
chr2:91459347-91459366	91459363	8	8	sense	NGG	GGGAGAGAAGACAGTGACAG	5	RNA1	AD49ZG	RGEN-seq
chr2:93168117-93168136	93168133	6	6	sense	NGG	GGGCTGATACAGAGGGACTG	5	RNA1	AD49ZG	RGEN-seq
chr2:95000522-95000541	95000538	10	10	sense	NAG	GGAAGGAAACAGAGTTACCA	5	RNA1	AD49ZG	RGEN-seq
chr2:95705029-95705048	95705031	16	15	antisense	NGG	GAGAGGGAACAGAGGGATCA	5	RNA1	AD49ZG	RGEN-seq
chr2:97664246-97664265	97664262	48	46	sense	NAG	TTGCGGAAACAGAGTAACAG	5	RNA1	AD49ZG	RGEN-seq
chr2:98816559-98816578	98816575	33	20	sense	NGG	GAGCAGGAAGAGAGTGACAC	5	RNA1	AD49ZG	RGEN-seq
chr2:104180206-104180225	104180222	8	8	sense	NGG	GAGAGGGAACAGAATGAGAG	5	RNA1	AD49ZG	RGEN-seq
chr2:106243185-106243204	106243201	30	29	sense	NAG	AGTAAGGAACAGAGTGACTG	5	RNA1	AD49ZG	RGEN-seq
chr2:106896397-106896416	106896413	235	230	sense	NGG	GGACAGGGACACAGTGACTG	5	RNA1	AD49ZG	RGEN-seq
chr2:108877292-108877311	108877294	12	12	antisense	NGG	GCTCTGGAACAGAGTTACAG	5	RNA1	AD49ZG	RGEN-seq
chr2:117198358-117198377	117198360	169	168	antisense	NGG	GAGAGGGAACACAGAGACCT	5	RNA1	AD49ZG	RGEN-seq
chr2:117235019-117235038	117235021	148	148	antisense	NGG	AGGCTGGGACAGGATGACCG	5	RNA1	AD49ZG	RGEN-seq
chr2:117613545-117613564	117613561	68	48	sense	NGG	AAGCTGGAAGAGAGTGACTG	5	RNA1	AD49ZG	RGEN-seq
chr2:118693266-118693285	118693282	90	90	sense	NGG	GCGCAGGACCAGAGAGATCG	5	RNA1	AD49ZG	RGEN-seq
chr2:118801031-118801050	118801047	220	218	sense	NGG	GGGAAGGAACAGAGTAACAA	5	RNA1	AD49ZG	RGEN-seq
chr2:121697818-121697837	121697820	317	316	antisense	NGG	GGGAGGGCACAGTGTGACTA	5	RNA1	AD49ZG	RGEN-seq
chr2:126789701-126789720	126789703	42	42	antisense	NGG	GAGAGGCAACAGAGTGGCAG	5	RNA1	AD49ZG	RGEN-seq
chr2:132639458-132639477	132639474	32	32	sense	NGG	GGGCTTGATCAGAGTGACAG	4	RNA1	AD49ZG	RGEN-seq
chr2:139464473-139464492	139464475	122	122	antisense	NGG	AGGAGGGAACAGAATGGCCT	5	RNA1	AD49ZG	RGEN-seq
chr2:142766621-142766640	142766623	192	190	antisense	NGG	CGGAGGAGACAGAGTGACGG	5	RNA1	AD49ZG	RGEN-seq
chr2:144302401-144302420	144302417	88	70	sense	NAG	GAGCTGGTACAGAGTGACAG	4	RNA1	AD49ZG	RGEN-seq
chr2:148823034-148823053	148823050	70	64	sense	NGG	GGGCATGAACAGAGAGATCC	5	RNA1	AD49ZG	RGEN-seq
chr2:151149087-151149106	151149089	36	36	antisense	NGG	GAGTGGGAACAGAGTGGGAG	5	RNA1	AD49ZG	RGEN-seq
chr2:153608331-153608350	153608347	39	33	sense	NAG	GGGAGTGGGCAGAGTGACTG	5	RNA1	AD49ZG	RGEN-seq
chr2:163578420-163578439	163578436	18	6	sense	NAG	AGGCAGGAAGAGAGTGACTA	5	RNA1	AD49ZG	RGEN-seq
chr2:177861989-177862008	177862005	4	4	sense	NAG	GAGTGGGGACACAGAGACCG	5	RNA1	AD49ZG	RGEN-seq
chr2:178306552-178306571	178306554	5	5	antisense	NGG	GGGAAGGAACACAGTCACTG	5	RNA1	AD49ZG	RGEN-seq
chr2:178460217-178460236	178460233	9	9	sense	NAG	GGGTAGGTACACAGTGACCT	5	RNA1	AD49ZG	RGEN-seq
chr2:182249557-182249576	182249559	3	3	antisense	NGG	AGGAGGGAACAGAGAGGCAG	5	RNA1	AD49ZG	RGEN-seq
chr2:188143336-188143355	188143338	206	205	antisense	NGG	CACCGGGGACAGAGTGACTG	5	RNA1	AD49ZG	RGEN-seq
chr2:219830135-219830154	219830151	238	235	sense	NGG	AGAAGGGAGCAGAGTGAGCG	5	RNA1	AD49ZG	RGEN-seq
chr2:224082230-224082249	224082246	25	25	sense	NAG	GGGGAGGTACAGAATGACCT	5	RNA1	AD49ZG	RGEN-seq
chr2:231145848-231145867	231145864	30	30	sense	NGG	GAGTGGGTGCAGAGTGACCA	5	RNA1	AD49ZG	RGEN-seq
chr2:231313356-231313375	231313358	318	310	antisense	NGG	AGGAGGGAACAGAGAGACAA	5	RNA1	AD49ZG	RGEN-seq
chr2:232115692-232115711	232115708	103	102	sense	NGG	GGGAGGGTCCAGAGTGAACA	5	RNA1	AD49ZG	RGEN-seq
chr2:232249053-232249072	232249055	12	12	antisense	NGG	GGTAAGAAACAGAGTGTCCG	5	RNA1	AD49ZG	RGEN-seq
chr2:238750434-238750453	238750436	173	168	antisense	NGG	GCGCAGGACCAGAGAGATCG	5	RNA1	AD49ZG	RGEN-seq
chr2:251540459-251540478	251540475	3	3	sense	NAG	GGGTGTGGTCAGAGTGACCA	5	RNA1	AD49ZG	RGEN-seq
chr2:258010349-258010368	258010351	109	107	antisense	NGG	GAGCGGGAACAGAGAAACAG	4	RNA1	AD49ZG	RGEN-seq
chr2:273622779-273622798	273622795	42	42	sense	NGG	AGGCGTGGTCAGAGTGACCT	5	RNA1	AD49ZG	RGEN-seq
chr2:278726796-278726815	278726798	158	115	antisense	NAG	AGGAGAGAAGAGAGTGACAG	5	RNA1	AD49ZG	RGEN-seq
chr2:280366235-280366254	280366237	3	3	antisense	NGG	GGCAGGGATGAGAGTGACCT	5	RNA1	AD49ZG	RGEN-seq
chr2:287544234-287544253	287544250	9	9	sense	NGG	GGGCTGGATCAGAGAGACTT	5	RNA1	AD49ZG	RGEN-seq
chr2:288964110-288964129	288964126	175	172	sense	NGG	TGGCGGGGACAGAGCGACCT	4	RNA1	AD49ZG	RGEN-seq
chr2:290477826-290477845	290477828	338	337	antisense	NAG	GGGAAAGAACAAAATGACCG	5	RNA1	AD49ZG	RGEN-seq
chr2:290827777-290827796	290827779	46	45	antisense	NGG	GAGCAGGTAAAGAGTGACAG	5	RNA1	AD49ZG	RGEN-seq
chr2:297767597-297767616	297767599	163	161	antisense	NGG	AGCGGGGAACAGAGAGACAG	5	RNA1	AD49ZG	RGEN-seq
chr2:300926186-300926205	300926202	142	138	sense	NAG	GGGAGGAAACAGAGAGACCT	4	RNA1	AD49ZG	RGEN-seq
chr2:304173267-304173286	304173283	206	201	sense	NGG	TACCTGGAACAGAGTGACCT	5	RNA1	AD49ZG	RGEN-seq
chr2:310153159-310153178	310153175	65	64	sense	NGG	GCGCAGGACCAGAGAGATCG	5	RNA1	AD49ZG	RGEN-seq
chr2:317044979-317044998	317044995	179	165	sense	NGG	GAGAGGGAAAAGAGAGAACG	5	RNA1	AD49ZG	RGEN-seq
chr2:318217071-318217090	318217073	22	22	antisense	NGG	GGGCTGGAAATCAGTGACCA	5	RNA1	AD49ZG	RGEN-seq
chr2:320289685-320289704	320289701	3	3	sense	NAG	GGAGGGGGACAGAATGCCCG	5	RNA1	AD49ZG	RGEN-seq
chr2:329263687-329263706	329263689	7	7	antisense	NAG	GGGGGGAGACAGAGAGACTG	5	RNA1	AD49ZG	RGEN-seq
chr2:333071270-333071289	333071286	198	198	sense	NGG	AGGAGAGAACAGAGGGACAG	5	RNA1	AD49ZG	RGEN-seq
chr2:337622065-337622084	337622067	11	8	antisense	NGG	AGTGGGGAACAGAGAGACGG	5	RNA1	AD49ZG	RGEN-seq
chr2:337622248-337622267	337622250	41	37	antisense	NGG	AGTGGGGAACAGAGAGACGG	5	RNA1	AD49ZG	RGEN-seq
chr2:338112421-338112440	338112423	42	42	antisense	NGG	GGGGAGGAGCAGAGTGGACG	5	RNA1	AD49ZG	RGEN-seq
chr2:344087242-344087261	344087258	263	260	sense	NGG	TGATGGAAACAGAGTGACCT	5	RNA1	AD49ZG	RGEN-seq
chr2:348395964-348395983	348395966	4	4	antisense	NGG	GAGAGAGTAGAGAGTGACCG	5	RNA1	AD49ZG	RGEN-seq
chr2:348890438-348890457	348890440	433	429	antisense	NAG	GGTAGGGAACAGAGTGACCT	3	RNA1	AD49ZG	RGEN-seq
chr2:349667831-349667850	349667833	9	9	antisense	NGG	GGGCAGGAACACTGTGGCCG	4	RNA1	AD49ZG	RGEN-seq
chr2:354697558-354697577	354697560	408	404	antisense	NGG	CAGTGGGAACAGAGTGACCT	4	RNA1	AD49ZG	RGEN-seq
chr2:357108898-357108917	357108914	232	223	sense	NGG	AGGCTGGCACAGAGGGACCA	5	RNA1	AD49ZG	RGEN-seq
chr2:359364713-359364732	359364729	5	5	sense	NGG	GGGAGCCAACAGAGTGGCCA	5	RNA1	AD49ZG	RGEN-seq
chr2:371580466-371580485	371580482	134	131	sense	NGG	CAGCAGGAAGAGAGTGACCC	5	RNA1	AD49ZG	RGEN-seq
chr2:376963605-376963624	376963621	293	289	sense	NGG	AGCAGGGAACAGAGAGACAG	5	RNA1	AD49ZG	RGEN-seq
chr2:383996865-383996884	383996881	83	67	sense	NAG	CGTTGAGAACAGAGTGCCCG	5	RNA1	AD49ZG	RGEN-seq
chr2:384355423-384355442	384355425	177	166	antisense	NAG	TGGCTGGAACAGAGAGACCA	4	RNA1	AD49ZG	RGEN-seq
chr2:393402497-393402516	393402499	298	294	antisense	NGG	GGCCATGAACAAAGTGACCA	5	RNA1	AD49ZG	RGEN-seq
chr2:396302844-396302863	396302846	21	21	antisense	NGG	GGGTGGGAACAGAGATCCCA	5	RNA1	AD49ZG	RGEN-seq
chr2:396549260-396549279	396549276	311	311	sense	NGG	GGGTGGGAACAGAGTGCCCT	3	RNA1	AD49ZG	RGEN-seq
chr2:405395798-405395817	405395814	4	4	sense	NGG	TGGCAGGAGGAGAGTGAGCG	5	RNA1	AD49ZG	RGEN-seq
chr2:405720468-405720487	405720484	3	3	sense	NGG	GGGAGGGGACAGACAGAACG	5	RNA1	AD49ZG	RGEN-seq
chr2:415516041-415516060	415516057	3	3	sense	NAG	GCGGGGAAACAGAGAGACAG	5	RNA1	AD49ZG	RGEN-seq
chr2:418638997-418639016	418638999	16	16	antisense	NAG	AGGTGGGAACAGGATGACCC	5	RNA1	AD49ZG	RGEN-seq
chr2:422557314-422557333	422557316	233	227	antisense	NAG	GGGAAGTAACAGAGTGACTA	5	RNA1	AD49ZG	RGEN-seq
chr2:423436988-423437007	423436990	153	150	antisense	NGG	GGGATGGAGCAGAGTGAATG	5	RNA1	AD49ZG	RGEN-seq
chr2:423728589-423728608	423728591	121	116	antisense	NGG	GGGAAGGTACGGAGTGACAG	5	RNA1	AD49ZG	RGEN-seq
chr2:424742799-424742818	424742801	165	164	antisense	NGG	GGGAGGGGAAAGAGTGTCCG	4	RNA1	AD49ZG	RGEN-seq
chr2:431687328-431687347	431687330	342	338	antisense	NGG	GGTTAGGAACAGACTGACCT	5	RNA1	AD49ZG	RGEN-seq
chr2:431835916-431835935	431835932	23	22	sense	NAG	AGGCGGGGACAGAGGGACCC	4	RNA1	AD49ZG	RGEN-seq
chr2:447818201-447818220	447818203	154	150	antisense	NAG	GGGGAGGAACAGAGAAACCC	5	RNA1	AD49ZG	RGEN-seq
chr2:449558269-449558288	449558285	8	8	sense	NGG	GGGTGGAAACAGAGTGGGTG	5	RNA1	AD49ZG	RGEN-seq
chr2:449959336-449959355	449959352	224	218	sense	NAG	CCGCGGGATCACAGTGACCG	4	RNA1	AD49ZG	RGEN-seq
chr2:450116703-450116722	450116705	74	73	antisense	NGG	GTGGGGGAACAGGCTGACCA	5	RNA1	AD49ZG	RGEN-seq
chr2:451225886-451225905	451225902	19	18	sense	NGG	GGGGAGGAACAGACAGACAG	5	RNA1	AD49ZG	RGEN-seq
chr2:451849255-451849274	451849271	59	59	sense	NGG	GGGCTGGAAAGGAGTAACCA	5	RNA1	AD49ZG	RGEN-seq
chr2:452393977-452393996	452393993	6	5	sense	NGG	GGGAGGGGACAGAGAGAAGG	5	RNA1	AD49ZG	RGEN-seq
chr2:456967223-456967242	456967239	4	3	sense	NAG	GGGCAGTGACAGAGTGACAG	4	RNA1	AD49ZG	RGEN-seq
chr2:458063427-458063446	458063429	106	60	antisense	NGG	GGAGGGGTACAGAGAGACCC	5	RNA1	AD49ZG	RGEN-seq
chr2:458282469-458282488	458282485	50	50	sense	NGG	GGTCGAGAACAGAGAGAATG	5	RNA1	AD49ZG	RGEN-seq
chr2:458894034-458894053	458894050	7	7	sense	NGG	GGGCTGGAGCAGAATGACGG	4	RNA1	AD49ZG	RGEN-seq
chr2:458906118-458906137	458906120	201	199	antisense	NGG	GGGCTGGAGCAGAATGACAG	4	RNA1	AD49ZG	RGEN-seq
chr2:462780198-462780217	462780214	4	3	sense	NGG	AGGCGGGTACAGAGAGATGG	5	RNA1	AD49ZG	RGEN-seq
chr2:464497179-464497198	464497195	11	9	sense	NGG	TGCTTGCAACAGAGTGACCG	5	RNA1	AD49ZG	RGEN-seq
chr3:1642768-1642787	1642784	72	71	sense	NAG	AGGCTGGCACAGAGAGACCA	5	RNA1	AD49ZG	RGEN-seq
chr3:3402366-3402385	3402368	138	133	antisense	NGG	GGGCAGGAACAGAATATCCT	5	RNA1	AD49ZG	RGEN-seq
chr3:6797482-6797501	6797498	272	270	sense	NGG	GAGAGGGAACAGAGGGACCT	4	RNA1	AD49ZG	RGEN-seq
chr3:10247671-10247690	10247673	4	4	antisense	NGG	GACCAGGAACAGAGTGGCAG	5	RNA1	AD49ZG	RGEN-seq
chr3:10677101-10677120	10677103	18	18	antisense	NAG	GGGAGGGAAAAGGGTGACCT	4	RNA1	AD49ZG	RGEN-seq
chr3:18831314-18831333	18831316	64	61	antisense	NGG	GGGTGGGGACAGAGGGACTG	4	RNA1	AD49ZG	RGEN-seq
chr3:19852803-19852822	19852819	100	96	sense	NGG	GCCCTGGAACAGAGAGATCG	5	RNA1	AD49ZG	RGEN-seq
chr3:26814325-26814344	26814341	58	53	sense	NGG	AGCGGGGAACAGAGAGACGG	5	RNA1	AD49ZG	RGEN-seq
chr3:34295535-34295554	34295551	75	75	sense	NAG	GTTCAAGAACAGAGTGACCT	5	RNA1	AD49ZG	RGEN-seq
chr3:40928379-40928398	40928395	97	95	sense	NGG	GGTTGGAAACAGAGTGATCC	5	RNA1	AD49ZG	RGEN-seq
chr3:42738135-42738154	42738151	235	234	sense	NGG	GAGCAGGAACTCAGTGACCT	5	RNA1	AD49ZG	RGEN-seq
chr3:44479217-44479236	44479219	13	12	antisense	NAG	GGGCAGGAAGGGAGTGACAC	5	RNA1	AD49ZG	RGEN-seq
chr3:46031439-46031458	46031455	3	3	sense	NGG	GTTTGGGAAGAGAGTGATCG	5	RNA1	AD49ZG	RGEN-seq
chr3:47897077-47897096	47897079	3	3	antisense	NAG	GGAAGGAAACTGAGTGACAG	5	RNA1	AD49ZG	RGEN-seq
chr3:47943399-47943418	47943415	379	376	sense	NGG	TGGAGGGAACAGGATGACCA	5	RNA1	AD49ZG	RGEN-seq
chr3:49989561-49989580	49989577	137	130	sense	NGG	GAGCAGGAACAGAGGGATCC	5	RNA1	AD49ZG	RGEN-seq
chr3:64895291-64895310	64895307	12	10	sense	NGG	GGGCATGATCAGAGTGACGT	5	RNA1	AD49ZG	RGEN-seq
chr3:67511413-67511432	67511415	44	41	antisense	NAG	GGAGGGCAACAGAGAGACAG	5	RNA1	AD49ZG	RGEN-seq
chr3:69078537-69078556	69078553	47	46	sense	NGG	CGTCGAGAGCAGAGTGACCC	5	RNA1	AD49ZG	RGEN-seq
chr3:70280293-70280312	70280309	17	16	sense	NGG	GGGAGGAAACAGGATGACTG	5	RNA1	AD49ZG	RGEN-seq
chr3:72277886-72277905	72277902	250	239	sense	NGG	GGGAGGGACCAGAGTATCCT	5	RNA1	AD49ZG	RGEN-seq
chr3:77192694-77192713	77192710	99	99	sense	NGG	GCCCTGGAACAGAGTGAATG	5	RNA1	AD49ZG	RGEN-seq
chr3:80866460-80866479	80866462	88	84	antisense	NGG	GGACGGAGACAGGGTGACCT	5	RNA1	AD49ZG	RGEN-seq
chr3:86635751-86635770	86635753	6	6	antisense	NGG	TGGAGGGAACAGTGTGAGCA	5	RNA1	AD49ZG	RGEN-seq
chr3:90273096-90273115	90273098	5	5	antisense	NAG	GGGAGGAGACAGAGAGACAG	5	RNA1	AD49ZG	RGEN-seq
chr3:98152723-98152742	98152739	64	63	sense	NAG	GGCGAGGAGCAGAGTGACTG	5	RNA1	AD49ZG	RGEN-seq
chr3:107090386-107090405	107090402	291	287	sense	NGG	GGGAGAGTCCAGAGTGACCA	5	RNA1	AD49ZG	RGEN-seq
chr3:108517403-108517422	108517405	17	17	antisense	NAG	GGGAGGAAAAAGAGAGACCT	5	RNA1	AD49ZG	RGEN-seq
chr3:108793328-108793347	108793344	52	52	sense	NAG	GGGAAGGAGCAGAGAGACCT	5	RNA1	AD49ZG	RGEN-seq
chr3:118583934-118583953	118583950	24	23	sense	NAG	AGGGAGGATCAGAGTGACCC	5	RNA1	AD49ZG	RGEN-seq
chr3:127783687-127783706	127783689	20	19	antisense	NGG	GGACGGGGACAGAGTGAGGG	4	RNA1	AD49ZG	RGEN-seq
chr3:128087446-128087465	128087462	126	124	sense	NGG	GGAAGGGGACTGAGTGACTG	5	RNA1	AD49ZG	RGEN-seq
chr3:128111028-128111047	128111044	115	114	sense	NGG	GGGTGGGATCATAGAGACCT	5	RNA1	AD49ZG	RGEN-seq
chr3:128221469-128221488	128221485	21	21	sense	NGG	GTGTGGGGACAGAGTTACCT	5	RNA1	AD49ZG	RGEN-seq
chr3:134825296-134825315	134825298	27	9	antisense	NGG	GGGGGGGAGCAGAGTAAACA	5	RNA1	AD49ZG	RGEN-seq
chr3:135673437-135673456	135673453	58	58	sense	NGG	AGTTGGGAACAGAGTGAGCA	5	RNA1	AD49ZG	RGEN-seq
chr3:138984095-138984114	138984111	36	35	sense	NAG	GGGAGAGAACAGAGTGGCCA	4	RNA1	AD49ZG	RGEN-seq
chr3:139446558-139446577	139446560	16	16	antisense	NGG	TGGTGGGAACAGAGTGCCTC	5	RNA1	AD49ZG	RGEN-seq
chr3:142797120-142797139	142797136	72	72	sense	NAG	CAGGGGGAACAGTGTGACTG	5	RNA1	AD49ZG	RGEN-seq
chr3:144611537-144611556	144611553	55	55	sense	NGG	GGGCTGGGTCACAGTGACCT	5	RNA1	AD49ZG	RGEN-seq
chr3:147889186-147889205	147889202	366	254	sense	NGG	GGGTGGAAACAGGGTGACCT	4	RNA1	AD49ZG	RGEN-seq
chr3:149691042-149691061	149691058	118	117	sense	NGG	TGGCGGGCACAAAGTGTCCT	5	RNA1	AD49ZG	RGEN-seq
chr3:150411698-150411717	150411700	334	328	antisense	NGG	AGAAGTGAACAGAGTGAACG	5	RNA1	AD49ZG	RGEN-seq
chr3:152350488-152350507	152350490	6	6	antisense	NAG	GCGGGGAAACAGAGAGACAG	5	RNA1	AD49ZG	RGEN-seq
chr3:153712316-153712335	153712318	11	9	antisense	NGG	GGGTGGGGACAGAGTGCTTG	5	RNA1	AD49ZG	RGEN-seq
chr3:153772083-153772102	153772085	32	32	antisense	NAG	GGAATAGAACAGAGTGACTG	5	RNA1	AD49ZG	RGEN-seq
chr3:154454535-154454554	154454551	101	99	sense	NAG	CCTTGGGAACAGAGTGACAG	5	RNA1	AD49ZG	RGEN-seq
chr3:158157055-158157074	158157057	9	9	antisense	NAG	CAGCAGGAACAGAGTGTCCT	5	RNA1	AD49ZG	RGEN-seq
chr3:161729501-161729520	161729503	51	42	antisense	NGG	GGGTGGAAACAGTGTGACAC	5	RNA1	AD49ZG	RGEN-seq
chr3:162952485-162952504	162952487	321	314	antisense	NGG	GTGAGGGAACACAGTAACCC	5	RNA1	AD49ZG	RGEN-seq
chr3:165764370-165764389	165764386	98	95	sense	NGG	GGGAAGCATCAGAGTGACCA	5	RNA1	AD49ZG	RGEN-seq
chr3:166275708-166275727	166275710	81	75	antisense	NGG	AGCGGGGAACAGAGAGACGG	5	RNA1	AD49ZG	RGEN-seq
chr3:170138872-170138891	170138888	126	126	sense	NAG	TGGGGTGAACAGAGTGACAG	4	RNA1	AD49ZG	RGEN-seq
chr3:171556155-171556174	171556171	9	9	sense	NGG	GGGAGGGGAGGGAGTGACAG	5	RNA1	AD49ZG	RGEN-seq
chr3:175205770-175205789	175205786	6	6	sense	NAG	GTGTAGGAACATAGTGACAG	5	RNA1	AD49ZG	RGEN-seq
chr3:176001748-176001767	176001750	22	22	antisense	NAG	AGGAGGGAATGGAGTGACCA	5	RNA1	AD49ZG	RGEN-seq
chr3:183331040-183331059	183331042	12	12	antisense	NGG	GAGCGCGCACAGAGAGACAG	5	RNA1	AD49ZG	RGEN-seq
chr3:188778492-188778511	188778508	73	73	sense	NAG	GGATGGGGAAAGAGTGACCC	5	RNA1	AD49ZG	RGEN-seq
chr3:190538092-190538111	190538094	394	387	antisense	NGG	TGGAGGGAACACACTGACCC	5	RNA1	AD49ZG	RGEN-seq
chr3:192644938-192644957	192644940	143	142	antisense	NGG	AGGGGGGAAGAGAGAGACAG	5	RNA1	AD49ZG	RGEN-seq
chr3:197246616-197246635	197246632	64	63	sense	NAG	AGTCGGTAACAGAGTGACTG	4	RNA1	AD49ZG	RGEN-seq
chr3:198343231-198343250	198343233	252	251	antisense	NGG	GGAAGGGTACAGGGTGACTG	5	RNA1	AD49ZG	RGEN-seq
chr3:198721618-198721637	198721634	3	3	sense	NGG	GGGAGGGAGCCGAGGGACCC	5	RNA1	AD49ZG	RGEN-seq
chr3:198915954-198915973	198915956	67	66	antisense	NGG	GGGCAGAAACAGAATGACTC	5	RNA1	AD49ZG	RGEN-seq
chr3:200009476-200009495	200009478	460	451	antisense	NGG	TGATGGGAACAGAGTGACTT	5	RNA1	AD49ZG	RGEN-seq
chr3:204636916-204636935	204636932	13	12	sense	NGG	GAGGGGGAACAGAGAGGCTG	5	RNA1	AD49ZG	RGEN-seq
chr3:205045868-205045887	205045870	7	7	antisense	NGG	GGGAGGCCACAGTGTGACAG	5	RNA1	AD49ZG	RGEN-seq
chr3:205830011-205830030	205830013	26	25	antisense	NGG	GGGCAGGAGAAGAATGACTG	5	RNA1	AD49ZG	RGEN-seq
chr3:207135782-207135801	207135798	194	193	sense	NGG	GAGCGGGTACACAGTGCCCA	5	RNA1	AD49ZG	RGEN-seq
chr3:208792716-208792735	208792718	14	13	antisense	NAG	GGACTGGAGCAGAGTGACAG	4	RNA1	AD49ZG	RGEN-seq
chr3:210985694-210985713	210985696	147	142	antisense	NAG	GGGAAAGAACACAGTGACAG	5	RNA1	AD49ZG	RGEN-seq
chr3:211718946-211718965	211718948	14	12	antisense	NAG	GTGCAGGAGCACAGTGACCC	5	RNA1	AD49ZG	RGEN-seq
chr3:213044852-213044871	213044854	4	4	antisense	NAG	GGGCAGGAACATAGAGACAG	4	RNA1	AD49ZG	RGEN-seq
chr3:215541332-215541351	215541348	218	215	sense	NGG	GGAAGGGAGCCAAGTGACCG	5	RNA1	AD49ZG	RGEN-seq
chr3:215832542-215832561	215832558	31	24	sense	NAG	CGGCGGCAGAAGAGTGACTG	5	RNA1	AD49ZG	RGEN-seq
chr3:216931065-216931084	216931067	157	157	antisense	NGG	TGGGATGAACAGAGTGACCA	5	RNA1	AD49ZG	RGEN-seq
chr3:220635319-220635338	220635321	9	8	antisense	NGG	GAGAGGGAACAGAGCAACAG	5	RNA1	AD49ZG	RGEN-seq
chr3:220766396-220766415	220766398	219	218	antisense	NAG	GGGCAGGGGAAGAGTGACCG	4	RNA1	AD49ZG	RGEN-seq
chr3:222036828-222036847	222036830	43	43	antisense	NAG	AAGAGGGGAGAGAGTGACCG	5	RNA1	AD49ZG	RGEN-seq
chr3:224436754-224436773	224436770	15	8	sense	NAG	GGGGAGGAAGTGAGTGAACG	5	RNA1	AD49ZG	RGEN-seq
chr3:228221015-228221034	228221017	270	268	antisense	NGG	GGAAGGGTCCAGAGTGAACG	5	RNA1	AD49ZG	RGEN-seq
chr3:234210227-234210246	234210229	233	228	antisense	NGG	AGGAGGGAAGACAGAGACCG	5	RNA1	AD49ZG	RGEN-seq
chr3:235473053-235473072	235473069	111	111	sense	NGG	GGGCAGTCACAGAGGGACAG	5	RNA1	AD49ZG	RGEN-seq
chr3:243946311-243946330	243946313	133	131	antisense	NAG	GCCATAGAACAGAGTGACCG	5	RNA1	AD49ZG	RGEN-seq
chr3:248120781-248120800	248120797	5	5	sense	NGG	GGGCGGGGCCTGAGTGGCCG	4	RNA1	AD49ZG	RGEN-seq
chr3:257189390-257189409	257189406	270	263	sense	NAG	GGGAGGAAGCAGAGAGACCA	5	RNA1	AD49ZG	RGEN-seq
chr3:262850652-262850671	262850668	23	23	sense	NGG	GCGGGGGACCAGGGAGACCG	5	RNA1	AD49ZG	RGEN-seq
chr3:262941358-262941377	262941360	35	35	antisense	NGG	GTCAGGGAACAGAGTGGCTG	5	RNA1	AD49ZG	RGEN-seq
chr3:277343720-277343739	277343722	15	14	antisense	NGG	GGGCAGGAGCAGAATGACTT	5	RNA1	AD49ZG	RGEN-seq
chr3:277423346-277423365	277423362	75	74	sense	NAG	GGGAGGGAACAGAAAGACCA	4	RNA1	AD49ZG	RGEN-seq
chr4:2140271-2140290	2140287	26	26	sense	NAG	GGGAAAGAACAGAATGACCC	5	RNA1	AD49ZG	RGEN-seq
chr4:3475399-3475418	3475415	11	11	sense	NAG	AGGAGGGAGCAGAGAGACAG	5	RNA1	AD49ZG	RGEN-seq
chr4:5304464-5304483	5304466	7	7	antisense	NAG	GTGCAGAAACACAGTGACAG	5	RNA1	AD49ZG	RGEN-seq
chr4:5840744-5840763	5840760	460	455	sense	NGG	GAAAGGGAACTGAGTGACAG	5	RNA1	AD49ZG	RGEN-seq
chr4:5851444-5851463	5851460	28	27	sense	NGG	AGGAGCCAACAGAATGACCG	5	RNA1	AD49ZG	RGEN-seq
chr4:10288670-10288689	10288686	7	5	sense	NGG	GGGTGGGAATAGAATGATAG	5	RNA1	AD49ZG	RGEN-seq
chr4:11400437-11400456	11400453	12	12	sense	NGG	GGAAGGTAGAAGAGTGACCG	5	RNA1	AD49ZG	RGEN-seq
chr4:13449763-13449782	13449765	4	4	antisense	NAG	TGGTAGGAACTGAGTGACAG	5	RNA1	AD49ZG	RGEN-seq
chr4:18114083-18114102	18114085	15	15	antisense	NGG	AAGATGGAACAGAGTCACCG	5	RNA1	AD49ZG	RGEN-seq
chr4:19966112-19966131	19966114	106	105	antisense	NAG	GAGCAAGAACAAAGTGACAG	5	RNA1	AD49ZG	RGEN-seq
chr4:20236335-20236354	20236351	24	24	sense	NGG	GCATGGGAACAGAGTGAGCC	5	RNA1	AD49ZG	RGEN-seq
chr4:24311574-24311593	24311590	8	6	sense	NAG	GGGTGGGAGCAGAGGGACAG	4	RNA1	AD49ZG	RGEN-seq
chr4:25798607-25798626	25798623	6	6	sense	NGG	GTGTGGGAAAAGAGGGACAG	5	RNA1	AD49ZG	RGEN-seq
chr4:30065812-30065831	30065828	541	534	sense	NGG	GGGAAGAAACAGAGAGACTG	5	RNA1	AD49ZG	RGEN-seq
chr4:32558713-32558732	32558715	10	10	antisense	NGG	GGGTGGAAACAGAGTGCCAT	5	RNA1	AD49ZG	RGEN-seq
chr4:37163681-37163700	37163683	30	30	antisense	NAG	GGGTGGGAACAGAGTGAAGG	3	RNA1	AD49ZG	RGEN-seq
chr4:42301861-42301880	42301863	67	66	antisense	NGG	AGGCGGGACTAGAGGGACAG	5	RNA1	AD49ZG	RGEN-seq
chr4:44688867-44688886	44688883	26	26	sense	NGG	GCGCGGGGACAAAGCGACTG	5	RNA1	AD49ZG	RGEN-seq
chr4:45341698-45341717	45341714	67	67	sense	NGG	TGGTGGAAACAGAGTGGCAG	5	RNA1	AD49ZG	RGEN-seq
chr4:45414284-45414303	45414286	43	39	antisense	NAG	AGGCAGGAAAAGGGTGACCA	5	RNA1	AD49ZG	RGEN-seq
chr4:48585613-48585632	48585615	5	4	antisense	NGG	TGGCTGGAACAGAGCCACCA	5	RNA1	AD49ZG	RGEN-seq
chr4:53958620-53958639	53958636	96	93	sense	NGG	TGCTGGGATCAGAGTGACAG	5	RNA1	AD49ZG	RGEN-seq
chr4:73934922-73934941	73934924	184	183	antisense	NGG	AGGAGGGTACAGAGTGAGCA	5	RNA1	AD49ZG	RGEN-seq
chr4:77211309-77211328	77211311	4	4	antisense	NAG	GGGTAGGAACCGAGTGGCCT	5	RNA1	AD49ZG	RGEN-seq
chr4:77407969-77407988	77407971	67	65	antisense	NGG	GGGGGAGAAGAGAGTGACAG	4	RNA1	AD49ZG	RGEN-seq
chr4:78566225-78566244	78566227	28	28	antisense	NGG	GGGCGTGGTCAGAGTGACCT	4	RNA1	AD49ZG	RGEN-seq
chr4:82180434-82180453	82180436	145	143	antisense	NGG	AAGAGGGACCAGAGTGGCCG	5	RNA1	AD49ZG	RGEN-seq
chr4:82244650-82244669	82244666	196	194	sense	NAG	GGGAAAGGACAGAGTGACCA	5	RNA1	AD49ZG	RGEN-seq
chr4:87849631-87849650	87849633	18	18	antisense	NGG	GGGGAGCAACAGTGTGACCC	5	RNA1	AD49ZG	RGEN-seq
chr4:98376184-98376203	98376200	32	31	sense	NAG	GTGAGGGGACAGAGTGAGCG	4	RNA1	AD49ZG	RGEN-seq
chr4:112177167-112177186	112177183	14	12	sense	NGG	GGGAGGGAACAGAGTGGCGT	4	RNA1	AD49ZG	RGEN-seq
chr4:113771053-113771072	113771055	104	103	antisense	NAG	TGGAGAGAACACAGTGACCT	5	RNA1	AD49ZG	RGEN-seq
chr4:123030207-123030226	123030209	8	8	antisense	NAG	GGCCTGGGACAGAGTGAAAG	5	RNA1	AD49ZG	RGEN-seq
chr4:123042135-123042154	123042137	133	107	antisense	NGG	GGGCAGGAGCAGAGTGAACC	4	RNA1	AD49ZG	RGEN-seq
chr4:125804355-125804374	125804357	104	103	antisense	NAG	GGGCGTGGTCAGAGTGACCG	3	RNA1	AD49ZG	RGEN-seq
chr4:126173224-126173243	126173226	6	6	antisense	NGG	GAGTGGGCACAGAGTGGCCC	5	RNA1	AD49ZG	RGEN-seq
chr4:134717541-134717560	134717557	6	6	sense	NGG	GGGCTGTCACAGAGTGGCCA	5	RNA1	AD49ZG	RGEN-seq
chr4:136314584-136314603	136314586	6	6	antisense	NAG	AGATGGGAACAGAGTCACCA	5	RNA1	AD49ZG	RGEN-seq
chr4:144115533-144115552	144115549	9	9	sense	NAG	GGGTGGAAACTGAATGACCA	5	RNA1	AD49ZG	RGEN-seq
chr4:144175397-144175416	144175413	3	3	sense	NGG	GGGTAGGAACAGACTGATCT	5	RNA1	AD49ZG	RGEN-seq
chr4:147799089-147799108	147799091	130	127	antisense	NGG	GGGCAGCATCAAAGTGACTG	5	RNA1	AD49ZG	RGEN-seq
chr4:151372771-151372790	151372787	15	15	sense	NGG	GAGAGGGACCTGAGGGACCG	5	RNA1	AD49ZG	RGEN-seq
chr4:151581944-151581963	151581960	5	5	sense	NGG	GGGCGTGGTCAGAGTGACAT	5	RNA1	AD49ZG	RGEN-seq
chr4:153023742-153023761	153023744	66	66	antisense	NGG	GGGCGTGATCAGAGTGACGT	4	RNA1	AD49ZG	RGEN-seq
chr4:155188074-155188093	155188076	5	5	antisense	NGG	GTGAGGGCACAGAGGGTCCG	5	RNA1	AD49ZG	RGEN-seq
chr4:157776372-157776391	157776374	260	252	antisense	NAG	AGGTGGGAATAGAGTGACTG	4	RNA1	AD49ZG	RGEN-seq
chr4:159000694-159000713	159000710	26	26	sense	NGG	GTGTGGGCACAGAGTGACCC	4	RNA1	AD49ZG	RGEN-seq
chr4:164168514-164168533	164168516	3	3	antisense	NAG	GGGAAGGAAGAGTGTGACCA	5	RNA1	AD49ZG	RGEN-seq
chr4:170204855-170204874	170204871	8	6	sense	NAG	GTGTGGTGACAGAGTGACCA	5	RNA1	AD49ZG	RGEN-seq
chr4:170283470-170283489	170283486	5	5	sense	NAG	GAGTGGGCAAAGAGTGACCG	4	RNA1	AD49ZG	RGEN-seq
chr4:174888603-174888622	174888619	13	12	sense	NGG	GGGTGGGAACAGAGTGAGTA	4	RNA1	AD49ZG	RGEN-seq
chr4:178757375-178757394	178757391	4	4	sense	NGG	GGGTGGGGACAGAGCCACCA	5	RNA1	AD49ZG	RGEN-seq
chr4:181279340-181279359	181279356	15	15	sense	NAG	AGGTGGAAACAGGGTGACTG	5	RNA1	AD49ZG	RGEN-seq
chr4:182768333-182768352	182768335	82	64	antisense	NAG	AGGCTGGTGCAGAGTGACAG	5	RNA1	AD49ZG	RGEN-seq
chr4:187304215-187304234	187304231	214	172	sense	NAG	GAGAGGGAACAGAGAGACCA	4	RNA1	AD49ZG	RGEN-seq
chr4:187413491-187413510	187413507	395	386	sense	NGG	CTGTGGGAACAGAGTGACAA	5	RNA1	AD49ZG	RGEN-seq
chr4:187868363-187868382	187868379	33	31	sense	NGG	TGGAGGGAAGAGAGTGAAGG	5	RNA1	AD49ZG	RGEN-seq
chr4:189143061-189143080	189143063	524	522	antisense	NGG	GGGAAAGAAAAGAGAGACCG	5	RNA1	AD49ZG	RGEN-seq
chr4:198213649-198213668	198213665	51	51	sense	NGG	AGGCACCAACAGAGTGACAG	5	RNA1	AD49ZG	RGEN-seq
chr4:199140532-199140551	199140548	77	77	sense	NGG	GGGCGGTCACAGGGTGAACG	4	RNA1	AD49ZG	RGEN-seq
chr4:202987802-202987821	202987818	393	390	sense	NGG	AGGTGGAGACAGAGTGACTG	5	RNA1	AD49ZG	RGEN-seq
chr4:205559954-205559973	205559956	7	7	antisense	NAG	GGAGGTGAACAGTGTGACCC	5	RNA1	AD49ZG	RGEN-seq
chr4:208195001-208195020	208195017	186	184	sense	NGG	GGACAGAAACAGAGTGACCT	4	RNA1	AD49ZG	RGEN-seq
chr4:208882103-208882122	208882119	4	4	sense	NGG	TGGAGGGAACAGAAGGACAG	5	RNA1	AD49ZG	RGEN-seq
chr4:210225153-210225172	210225169	90	51	sense	NAG	AGGAGGGAGGAGAGTGACTG	5	RNA1	AD49ZG	RGEN-seq
chr4:219525221-219525240	219525237	6	4	sense	NGG	GGCAGGGCACAGAGCTACCG	5	RNA1	AD49ZG	RGEN-seq
chr4:225940122-225940141	225940124	18	18	antisense	NGG	GGGCAGGAGCAGAATGACGG	4	RNA1	AD49ZG	RGEN-seq
chr4:227063179-227063198	227063181	8	7	antisense	NAG	AGGAAGGAACAGAGTGTCTG	5	RNA1	AD49ZG	RGEN-seq
chr5:3109253-3109272	3109269	7	7	sense	NGG	GGGTGGGAACAGACTGGCCT	4	RNA1	AD49ZG	RGEN-seq
chr5:6880844-6880863	6880860	12	8	sense	NAG	GGGTGGGTACAGAGCAACCA	5	RNA1	AD49ZG	RGEN-seq
chr5:7051264-7051283	7051280	231	226	sense	NGG	AGGCAGGAATTGAGTGACCC	5	RNA1	AD49ZG	RGEN-seq
chr5:7966180-7966199	7966196	86	77	sense	NGG	CAGCAGGAAGAGAGTGACAG	5	RNA1	AD49ZG	RGEN-seq
chr5:9121164-9121183	9121166	111	110	antisense	NGG	GAGCAGGCACAGAGAGACCC	5	RNA1	AD49ZG	RGEN-seq
chr5:13218137-13218156	13218153	334	332	sense	NGG	TGGCTGGAACTGAGTAACCA	5	RNA1	AD49ZG	RGEN-seq
chr5:26627401-26627420	26627403	53	53	antisense	NGG	GGGAGGAAACTGAGAGACAG	5	RNA1	AD49ZG	RGEN-seq
chr5:37722381-37722400	37722397	161	154	sense	NGG	AGGCTGGAACTCAGTGACCC	5	RNA1	AD49ZG	RGEN-seq
chr5:38183993-38184012	38184009	214	207	sense	NGG	GAGCGAGAAAAGAGTGATCT	5	RNA1	AD49ZG	RGEN-seq
chr5:40732634-40732653	40732636	339	337	antisense	NAG	AGGGAGAAACAAAGTGACCG	5	RNA1	AD49ZG	RGEN-seq
chr5:51688596-51688615	51688612	129	127	sense	NGG	GGCAAAGAACAGAGTGACCC	5	RNA1	AD49ZG	RGEN-seq
chr5:52834241-52834260	52834257	83	83	sense	NGG	GGGCCAGTACACAGTGACCT	5	RNA1	AD49ZG	RGEN-seq
chr5:53691789-53691808	53691791	253	249	antisense	NGG	GGGTGGGAGCAGAGGGACCT	4	RNA1	AD49ZG	RGEN-seq
chr5:68353371-68353390	68353373	6	6	antisense	NGG	AGCCAGGTACAGAGTGACCC	5	RNA1	AD49ZG	RGEN-seq
chr5:74656987-74657006	74657003	137	135	sense	NGG	GGGCTGGAATAGAGTGATTG	4	RNA1	AD49ZG	RGEN-seq
chr5:77258046-77258065	77258062	93	75	sense	NAG	GGGCTGGCACAAAGTGACAG	4	RNA1	AD49ZG	RGEN-seq
chr5:90937865-90937884	90937867	7	4	antisense	NGG	GGGCGTGGTCAGAGTGACGT	5	RNA1	AD49ZG	RGEN-seq
chr5:91921848-91921867	91921850	65	63	antisense	NGG	TGGCTGGTACAGAGGGACCC	5	RNA1	AD49ZG	RGEN-seq
chr5:96925897-96925916	96925899	4	4	antisense	NAG	GCGGGGAAACAGAGAGACAG	5	RNA1	AD49ZG	RGEN-seq
chr5:97626081-97626100	97626097	12	12	sense	NGG	GGGCTTGAACAGAGTAAAAG	5	RNA1	AD49ZG	RGEN-seq
chr5:100769729-100769748	100769745	56	54	sense	NAG	GGGCATGGACAGGGTGACCT	5	RNA1	AD49ZG	RGEN-seq
chr5:102483002-102483021	102483004	103	103	antisense	NGG	GGGAGGGTACAAAGGGACAG	5	RNA1	AD49ZG	RGEN-seq
chr5:103634627-103634646	103634643	136	135	sense	NGG	AGGAAGGAACCGAGGGACCG	5	RNA1	AD49ZG	RGEN-seq
chr5:105018115-105018134	105018117	6	6	antisense	NGG	GGAGGGGAACAGGGGGACAG	5	RNA1	AD49ZG	RGEN-seq
chr5:109565226-109565245	109565228	135	134	antisense	NGG	GGGAAGGAGCAGGGTGACAG	5	RNA1	AD49ZG	RGEN-seq
chr5:117774158-117774177	117774174	33	33	sense	NGG	GGGAGGGGAGAGAGGGACCT	5	RNA1	AD49ZG	RGEN-seq
chr5:125125535-125125554	125125537	9	8	antisense	NAG	GGGCGTGGTCAGAGTGACAT	5	RNA1	AD49ZG	RGEN-seq
chr5:131340264-131340283	131340266	29	28	antisense	NGG	GGGCGTGGTCAGGGTGACCT	5	RNA1	AD49ZG	RGEN-seq
chr5:139604583-139604602	139604599	231	227	sense	NAG	GGCTGGGAACAGAGAGACTA	5	RNA1	AD49ZG	RGEN-seq
chr5:143006687-143006706	143006703	4	3	sense	NAG	GGTCAGGAAAAAAGTGACCC	5	RNA1	AD49ZG	RGEN-seq
chr5:146781088-146781107	146781104	92	89	sense	NGG	AGCGGGGAACAGAGAGACGG	5	RNA1	AD49ZG	RGEN-seq
chr5:153174339-153174358	153174355	204	203	sense	NGG	GGGTGGGAAGAGAGTGACCT	3	RNA1	AD49ZG	RGEN-seq
chr5:159290106-159290125	159290108	333	331	antisense	NGG	GGCTGGGGACACAGTGACCT	5	RNA1	AD49ZG	RGEN-seq
chr5:163261513-163261532	163261529	188	183	sense	NGG	GGCTGGGAACACAGTGTCCT	5	RNA1	AD49ZG	RGEN-seq
chr5:169307744-169307763	169307760	105	92	sense	NGG	AGCGGGGAACAGAGAGACGG	5	RNA1	AD49ZG	RGEN-seq
chr5:170605422-170605441	170605424	39	39	antisense	NAG	AAACGGGAACGGAGTGACCC	5	RNA1	AD49ZG	RGEN-seq
chr5:172296789-172296808	172296805	412	409	sense	NGG	GGCTGGGAGCAGAGTGACTG	4	RNA1	AD49ZG	RGEN-seq
chr5:176784428-176784447	176784444	94	93	sense	NGG	AGGAGGCACCAGAGTGACTG	5	RNA1	AD49ZG	RGEN-seq
chr5:178088781-178088800	178088797	89	88	sense	NGG	GGGAGGAAGGAGAGAGACCG	5	RNA1	AD49ZG	RGEN-seq
chr5:182576034-182576053	182576050	4	3	sense	NGG	GAGTGTGAGCAGAGTGACAG	5	RNA1	AD49ZG	RGEN-seq
chr5:183683771-183683790	183683773	112	111	antisense	NGG	GGCAGGATACAGAGTGACAG	5	RNA1	AD49ZG	RGEN-seq
chr5:195063592-195063611	195063608	11	10	sense	NGG	GGGCGTGGTCAGGGTGACCT	5	RNA1	AD49ZG	RGEN-seq
chr5:195108638-195108657	195108654	284	279	sense	NGG	CAGCAGGAAAAGAGTGACAG	5	RNA1	AD49ZG	RGEN-seq
chr5:196565371-196565390	196565373	24	24	antisense	NGG	GAGCGGAAAGAGAGTGTACG	5	RNA1	AD49ZG	RGEN-seq
chr5:197111619-197111638	197111635	3	3	sense	NAG	GTGGGGGAGTAGAATGACCG	5	RNA1	AD49ZG	RGEN-seq
chr5:197582149-197582168	197582165	21	21	sense	NAG	TGGGGGAAACAGAGAGACAG	5	RNA1	AD49ZG	RGEN-seq
chr5:197896956-197896975	197896958	34	31	antisense	NGG	GGGTGGGGCTAGAGTGACAG	5	RNA1	AD49ZG	RGEN-seq
chr5:199414214-199414233	199414216	57	57	antisense	NAG	GGGAGGCACCAGAGTGACCA	4	RNA1	AD49ZG	RGEN-seq
chr5:203082173-203082192	203082189	265	263	sense	NAG	GGAAGGGAAGAGAGTGACCA	4	RNA1	AD49ZG	RGEN-seq
chr5:211957839-211957858	211957841	321	316	antisense	NGG	GTCCGAGAACAGAGAGACAG	5	RNA1	AD49ZG	RGEN-seq
chr5:214409481-214409500	214409483	146	143	antisense	NGG	TGGCAGACACAGAATGACCG	5	RNA1	AD49ZG	RGEN-seq
chr5:215722773-215722792	215722789	4	3	sense	NAG	GGGAGAGAGCACAGTGACCC	5	RNA1	AD49ZG	RGEN-seq
chr6:1298210-1298229	1298212	303	297	antisense	NAG	TTGCAGGAACATAGTGACCA	5	RNA1	AD49ZG	RGEN-seq
chr6:10667631-10667650	10667633	126	87	antisense	NGG	GGATGGGAAGAGGGAGACCG	5	RNA1	AD49ZG	RGEN-seq
chr6:14151686-14151705	14151688	37	36	antisense	NGG	GGGGGGGAAAAAGGTGACCT	5	RNA1	AD49ZG	RGEN-seq
chr6:16748746-16748765	16748762	231	230	sense	NAG	GAATAGGATCAGAGTGACCG	5	RNA1	AD49ZG	RGEN-seq
chr6:17133490-17133509	17133492	50	50	antisense	NGG	GGGGCAGAGCAGAGTGACAG	5	RNA1	AD49ZG	RGEN-seq
chr6:19569824-19569843	19569826	22	15	antisense	NAG	GGGAGAATAGAGAGTGACCG	5	RNA1	AD49ZG	RGEN-seq
chr6:21414826-21414845	21414828	9	6	antisense	NAG	GCGGGGAAACAGAGAGACGG	5	RNA1	AD49ZG	RGEN-seq
chr6:21415009-21415028	21415025	4	4	sense	NAG	GCGGGGAAACAGAGAGACGG	5	RNA1	AD49ZG	RGEN-seq
chr6:33271089-33271108	33271105	158	157	sense	NGG	GAGGGAGAACAGAGGGACAG	5	RNA1	AD49ZG	RGEN-seq
chr6:35817706-35817725	35817722	116	115	sense	NGG	GGGAGGAAGCAGAGTGGCCT	5	RNA1	AD49ZG	RGEN-seq
chr6:41066493-41066512	41066509	3	3	sense	NGG	GGGAGGGAAGAGAGAGAACT	5	RNA1	AD49ZG	RGEN-seq
chr6:45229439-45229458	45229441	195	192	antisense	NGG	AGGCCGGAGCAGAGTGAACA	5	RNA1	AD49ZG	RGEN-seq
chr6:49230267-49230286	49230283	4	4	sense	NGG	GGGCAGAATCGGAGGGACCG	5	RNA1	AD49ZG	RGEN-seq
chr6:51815953-51815972	51815955	233	233	antisense	NAG	AGGTGGGAAAAGAGTAACCA	5	RNA1	AD49ZG	RGEN-seq
chr6:53865363-53865382	53865365	502	497	antisense	NGG	GGACAGGAAAAGAGTGACTG	4	RNA1	AD49ZG	RGEN-seq
chr6:54280907-54280926	54280923	9	8	sense	NAG	GGTCAAGAACAGAGTGATCA	5	RNA1	AD49ZG	RGEN-seq
chr6:56098271-56098290	56098287	28	28	sense	NGG	GCACAGCAACAGAGTGACTG	5	RNA1	AD49ZG	RGEN-seq
chr6:59387001-59387020	59387017	4	4	sense	NAG	GGGAGGGAGCAGAGTATCCT	5	RNA1	AD49ZG	RGEN-seq
chr6:60025838-60025857	60025840	64	63	antisense	NGG	GCGTGGGGACAGAGGGACAG	5	RNA1	AD49ZG	RGEN-seq
chr6:64979359-64979378	64979361	163	161	antisense	NGG	GGGAGGGAACAGAGAGGCCT	4	RNA1	AD49ZG	RGEN-seq
chr6:65054731-65054750	65054733	78	74	antisense	NAG	GGGCAGTACCACAGTGACCT	5	RNA1	AD49ZG	RGEN-seq
chr6:65062705-65062724	65062721	118	89	sense	NGG	CAGCTGGAACAGAGTGACAC	5	RNA1	AD49ZG	RGEN-seq
chr6:65252979-65252998	65252981	21	21	antisense	NGG	GAGTGGGATAAGAGTGACCC	5	RNA1	AD49ZG	RGEN-seq
chr6:65639830-65639849	65639832	77	76	antisense	NGG	GGGAGGCAGCAGAGTAACCG	4	RNA1	AD49ZG	RGEN-seq
chr6:66328186-66328205	66328188	109	108	antisense	NGG	GAGAGGGGACAGAGTGTCCC	5	RNA1	AD49ZG	RGEN-seq
chr6:66365585-66365604	66365601	11	11	sense	NAG	TGAAGGGAAAAGAGTGCCCG	5	RNA1	AD49ZG	RGEN-seq
chr6:70756801-70756820	70756817	9	9	sense	NAG	AGGCTGGAGCAGAGGGACCA	5	RNA1	AD49ZG	RGEN-seq
chr6:74277704-74277723	74277706	80	70	antisense	NGG	AGCGGGGAACAGAGAGACGG	5	RNA1	AD49ZG	RGEN-seq
chr6:74455481-74455500	74455483	219	219	antisense	NGG	GAGAGGGAACAATGTGCCCG	5	RNA1	AD49ZG	RGEN-seq
chr6:74850641-74850660	74850643	20	19	antisense	NAG	AGGCGGGAGCAGAGGGACAT	5	RNA1	AD49ZG	RGEN-seq
chr6:89125584-89125603	89125600	14	10	sense	NAG	GGGAGGAAACTGAGTAACCC	5	RNA1	AD49ZG	RGEN-seq
chr6:89794929-89794948	89794931	135	131	antisense	NGG	AGGTGGGGACAGGGTGACTG	5	RNA1	AD49ZG	RGEN-seq
chr6:91718256-91718275	91718258	24	24	antisense	NGG	GGGCGTGGTCAGGGTGACCT	5	RNA1	AD49ZG	RGEN-seq
chr6:91885491-91885510	91885493	10	10	antisense	NAG	GGGCAGAGACAGAGAGACAG	5	RNA1	AD49ZG	RGEN-seq
chr6:93408224-93408243	93408226	11	9	antisense	NAG	GGCGGGGAGCAGAGTGACTG	4	RNA1	AD49ZG	RGEN-seq
chr6:93502771-93502790	93502773	53	53	antisense	NGG	AGGAGGGAACAAAGTGGCAG	5	RNA1	AD49ZG	RGEN-seq
chr6:95106165-95106184	95106167	22	22	antisense	NAG	TGTGGGAAGCAGAGTGACCG	5	RNA1	AD49ZG	RGEN-seq
chr6:96100550-96100569	96100566	12	11	sense	NGG	GGGGTGGGACACAGTGCCCG	5	RNA1	AD49ZG	RGEN-seq
chr6:96190601-96190620	96190617	6	6	sense	NAG	AAGCTGGAACAGAGTGAAAG	5	RNA1	AD49ZG	RGEN-seq
chr6:97096941-97096960	97096943	296	294	antisense	NGG	AGGAGGGAGCAGAGGGACTG	5	RNA1	AD49ZG	RGEN-seq
chr6:98180641-98180660	98180657	38	31	sense	NAG	GAGGGCGGTCAGAGTGACCG	5	RNA1	AD49ZG	RGEN-seq
chr6:103714789-103714808	103714791	52	51	antisense	NGG	AGCCGGGAACAGAGGACCCG	5	RNA1	AD49ZG	RGEN-seq
chr6:104893086-104893105	104893102	3	3	sense	NAG	GGGTGGTAAGAGTGTGACCT	5	RNA1	AD49ZG	RGEN-seq
chr6:105668517-105668536	105668533	422	418	sense	NGG	GGGCAGAGTCAGAGAGACCG	5	RNA1	AD49ZG	RGEN-seq
chr6:110909024-110909043	110909040	156	151	sense	NAG	GGGCAGGAATAGAGAGACCT	4	RNA1	AD49ZG	RGEN-seq
chr6:114331201-114331220	114331203	381	378	antisense	NGG	GGACAAGATCAGAGTGACTG	5	RNA1	AD49ZG	RGEN-seq
chr6:117688886-117688905	117688902	11	11	sense	NGG	GGGCGTGGCCAGGGTGACCT	5	RNA1	AD49ZG	RGEN-seq
chr6:122931839-122931858	122931841	5	5	antisense	NAG	CTGCGGAAACAGAGGGACAG	5	RNA1	AD49ZG	RGEN-seq
chr6:132372845-132372864	132372847	9	9	antisense	NGG	GAGTGGGAACAGAGTGCTTG	5	RNA1	AD49ZG	RGEN-seq
chr6:134992764-134992783	134992780	197	194	sense	NGG	GGGAGGAGACAGAAGGACCG	5	RNA1	AD49ZG	RGEN-seq
chr6:136508270-136508289	136508272	4	4	antisense	NGG	AGGCTGGAAGAGACTGACTG	5	RNA1	AD49ZG	RGEN-seq
chr6:140356983-140357002	140356999	6	6	sense	NGG	TGGCGGCAACAGGGAGACCC	5	RNA1	AD49ZG	RGEN-seq
chr6:146795615-146795634	146795631	117	115	sense	NGG	GGGAGGCAAAGGAGTGACCA	5	RNA1	AD49ZG	RGEN-seq
chr6:147221032-147221051	147221034	456	453	antisense	NGG	GAGCGGGAACAGAGAAACAG	4	RNA1	AD49ZG	RGEN-seq
chr6:150879920-150879939	150879922	123	121	antisense	NAG	GGCATGGAACAGAATGACCC	5	RNA1	AD49ZG	RGEN-seq
chr6:152922605-152922624	152922607	39	39	antisense	NGG	GGGAGGGAGCAGAGGGGCCG	4	RNA1	AD49ZG	RGEN-seq
chr6:153447037-153447056	153447053	139	138	sense	NGG	TTGTGAGAACAGAGTGACTG	5	RNA1	AD49ZG	RGEN-seq
chr6:153549882-153549901	153549884	30	28	antisense	NAG	GGGAGGAAATAGAGGGACCC	5	RNA1	AD49ZG	RGEN-seq
chr6:153611200-153611219	153611216	22	20	sense	NAG	GGGAGGGAACAGAGAAACTC	5	RNA1	AD49ZG	RGEN-seq
chr6:155849380-155849399	155849382	19	16	antisense	NGG	AGTGGGGAACAGAGAGACGG	5	RNA1	AD49ZG	RGEN-seq
chr6:158566250-158566269	158566266	271	187	sense	NGG	GGGAGGCAACAGAGGGACCT	4	RNA1	AD49ZG	RGEN-seq
chr6:159306530-159306549	159306546	15	15	sense	NGG	GGTGGGGCACAGAATGACTG	5	RNA1	AD49ZG	RGEN-seq
chr7:103973-103992	103975	228	214	antisense	NGG	AGCGGGGAACAGAGAGACGG	5	RNA1	AD49ZG	RGEN-seq
chr7:2666097-2666116	2666113	7	7	sense	NAG	GGGGGGGAACAGAGAGACAG	3	RNA1	AD49ZG	RGEN-seq
chr7:2698511-2698530	2698513	103	98	antisense	NGG	AGCGGGGAACAGAGAGACGG	5	RNA1	AD49ZG	RGEN-seq
chr7:2995262-2995281	2995278	5	5	sense	NAG	GGGTGGGAACGTAGTGACAG	4	RNA1	AD49ZG	RGEN-seq
chr7:4696303-4696322	4696305	424	422	antisense	NGG	TGGAAGGAACAGAGTGGCCG	4	RNA1	AD49ZG	RGEN-seq
chr7:5165822-5165841	5165824	12	8	antisense	NAG	GGTCAAGGACAGAGTGACTG	5	RNA1	AD49ZG	RGEN-seq
chr7:12806292-12806311	12806308	312	310	sense	NGG	AGGCAGAAACAGAGAGACCC	5	RNA1	AD49ZG	RGEN-seq
chr7:13281218-13281237	13281234	93	84	sense	NGG	AGCGGGGAACAGAGAGACGG	5	RNA1	AD49ZG	RGEN-seq
chr7:15012120-15012139	15012122	107	107	antisense	NGG	GGGAAGCATCAGAGTGACCA	5	RNA1	AD49ZG	RGEN-seq
chr7:15805647-15805666	15805649	211	211	antisense	NGG	GAGAGAGAACAGAGAGACAG	5	RNA1	AD49ZG	RGEN-seq
chr7:16705839-16705858	16705841	451	445	antisense	NGG	GAAAGGGAACAGAGGGACCT	5	RNA1	AD49ZG	RGEN-seq
chr7:17016121-17016140	17016137	116	110	sense	NGG	AGCCGGGAACAGAGAGACGG	4	RNA1	AD49ZG	RGEN-seq
chr7:19320260-19320279	19320276	27	27	sense	NGG	GGGAGATGACAGAGTGACAG	5	RNA1	AD49ZG	RGEN-seq
chr7:22658577-22658596	22658579	5	5	antisense	NAG	GGGAGTGAACAGAGAGACTA	5	RNA1	AD49ZG	RGEN-seq
chr7:22740244-22740263	22740260	137	137	sense	NAG	AGACAGGAACAGAGAGACCT	5	RNA1	AD49ZG	RGEN-seq
chr7:23727487-23727506	23727489	392	391	antisense	NGG	TGGAAGGAACAGAGTGGCCG	4	RNA1	AD49ZG	RGEN-seq
chr7:25903549-25903568	25903565	12	9	sense	NGG	GGAAGGGAACAGACAGACAG	5	RNA1	AD49ZG	RGEN-seq
chr7:26597249-26597268	26597251	37	37	antisense	NGG	GGCAGGGAACAGGGTGTCCT	5	RNA1	AD49ZG	RGEN-seq
chr7:28353912-28353931	28353914	133	132	antisense	NGG	GAGATGGAACAGAGAGACTG	5	RNA1	AD49ZG	RGEN-seq
chr7:33000045-33000064	33000061	5	5	sense	NGG	GAACTGCAACTGAGTGACCG	5	RNA1	AD49ZG	RGEN-seq
chr7:33026506-33026525	33026508	34	34	antisense	NGG	GAGCGGGAAGAGAATGACAG	4	RNA1	AD49ZG	RGEN-seq
chr7:34466530-34466549	34466532	5	4	antisense	NAG	GGAAGGGGCCAGAGTGACCC	5	RNA1	AD49ZG	RGEN-seq
chr7:34932448-34932467	34932464	89	87	sense	NAG	GCAGGGAAACAGAGTGACAG	5	RNA1	AD49ZG	RGEN-seq
chr7:36457763-36457782	36457779	15	15	sense	NGG	GGCGGGGAGCAGAGTGGCTG	5	RNA1	AD49ZG	RGEN-seq
chr7:37671911-37671930	37671913	5	5	antisense	NGG	GGGGGGGAACAGAGACTACG	5	RNA1	AD49ZG	RGEN-seq
chr7:38100066-38100085	38100068	168	166	antisense	NGG	GAGCATGAACAGTGTGACCT	5	RNA1	AD49ZG	RGEN-seq
chr7:39415792-39415811	39415794	14	13	antisense	NGG	GGGCAGGTACACATTGACCT	5	RNA1	AD49ZG	RGEN-seq
chr7:42111869-42111888	42111885	5	5	sense	NAG	GGGAAGGAACAGAGAGCCCT	5	RNA1	AD49ZG	RGEN-seq
chr7:43919316-43919335	43919332	38	38	sense	NGG	GGGAAGGCCCAGAGTGACCA	5	RNA1	AD49ZG	RGEN-seq
chr7:44955653-44955672	44955669	8	8	sense	NAG	GGGAGTAAGCAGAGTGACTG	5	RNA1	AD49ZG	RGEN-seq
chr7:44985935-44985954	44985937	239	236	antisense	NGG	GGGAGACAACATAGTGACCT	5	RNA1	AD49ZG	RGEN-seq
chr7:58267584-58267603	58267600	48	48	sense	NGG	AGGAAGGAACAGAGGGACAG	5	RNA1	AD49ZG	RGEN-seq
chr7:63654956-63654975	63654972	18	17	sense	NGG	GGGAGGAAACATAGTGATCC	5	RNA1	AD49ZG	RGEN-seq
chr7:64952583-64952602	64952585	15	15	antisense	NGG	GGCAGAGAACAGAGTGAGCT	5	RNA1	AD49ZG	RGEN-seq
chr7:65667797-65667816	65667799	7	7	antisense	NGG	GGGCCAAAACTGAGTGACTG	5	RNA1	AD49ZG	RGEN-seq
chr7:68324369-68324388	68324371	45	43	antisense	NGG	CCTCGGGAACAGAGTGAGCT	5	RNA1	AD49ZG	RGEN-seq
chr7:68633365-68633384	68633381	3	3	sense	NAG	CTGGGGGCACAGAGTGACCC	5	RNA1	AD49ZG	RGEN-seq
chr7:71367841-71367860	71367857	37	36	sense	NGG	GGGTGGGAGAAGAATGACCC	5	RNA1	AD49ZG	RGEN-seq
chr7:71977357-71977376	71977373	143	143	sense	NGG	GGTCAGGATCAGAGTGAATG	5	RNA1	AD49ZG	RGEN-seq
chr7:72737312-72737331	72737328	15	15	sense	NAG	TGGAGGGGACAGAGTGAAAG	5	RNA1	AD49ZG	RGEN-seq
chr7:73235646-73235665	73235662	8	8	sense	NGG	GGTGGGGAACAGAGATACTG	5	RNA1	AD49ZG	RGEN-seq
chr7:81515946-81515965	81515962	22	22	sense	NGG	GGTGGGGTACAGAGTGACCA	4	RNA1	AD49ZG	RGEN-seq
chr7:83240293-83240312	83240309	7	7	sense	NGG	GGGCAGGAGCAAGGTGACCC	5	RNA1	AD49ZG	RGEN-seq
chr7:86063175-86063194	86063191	178	178	sense	NGG	AGCGGGGAACAGAGAGACAG	5	RNA1	AD49ZG	RGEN-seq
chr7:87212643-87212662	87212645	147	146	antisense	NGG	CACAGGGAACTGAGTGACCG	5	RNA1	AD49ZG	RGEN-seq
chr7:88830970-88830989	88830986	637	632	sense	NGG	GGCTTGGAACACAGTGACCC	5	RNA1	AD49ZG	RGEN-seq
chr7:91510541-91510560	91510557	11	11	sense	NAG	GGGGCGGCACACAGTGACCA	5	RNA1	AD49ZG	RGEN-seq
chr7:104495853-104495872	104495869	18	17	sense	NGG	AGTGGGGAACAGAGAGACGG	5	RNA1	AD49ZG	RGEN-seq
chr7:109005949-109005968	109005965	8	8	sense	NAG	GAGGGGGTACAGAGTGACTG	4	RNA1	AD49ZG	RGEN-seq
chr7:109544041-109544060	109544043	118	117	antisense	NAG	TGGCTGAAACAGAATGACCA	5	RNA1	AD49ZG	RGEN-seq
chr7:114010700-114010719	114010702	47	46	antisense	NAG	GGAGGTGAACAGAGTGACAG	4	RNA1	AD49ZG	RGEN-seq
chr7:114650824-114650843	114650840	17	17	sense	NGG	GCGAGGAAACAGAGGGGCCG	5	RNA1	AD49ZG	RGEN-seq
chr7:123834375-123834394	123834377	128	122	antisense	NAG	GGCCGGGAGAAGAGAGACCA	5	RNA1	AD49ZG	RGEN-seq
chr7:127805238-127805257	127805254	43	41	sense	NGG	AGCGGGGAACAGAGAGACGG	5	RNA1	AD49ZG	RGEN-seq
chr7:129829882-129829901	129829884	209	209	antisense	NGG	TGGAAGGAACAGAGTGGCCG	4	RNA1	AD49ZG	RGEN-seq
chr7:130222850-130222869	130222866	122	120	sense	NGG	GGGGCGGGACAGAGGGACCG	4	RNA1	AD49ZG	RGEN-seq
chr7:132490843-132490862	132490859	8	6	sense	NAG	GGAGGGGGAGAGAGTGACAG	5	RNA1	AD49ZG	RGEN-seq
chr7:133700536-133700555	133700538	297	293	antisense	NGG	GGACTGGAACAGAGTGACCA	3	RNA1	AD49ZG	RGEN-seq
chr7:134037847-134037866	134037849	114	114	antisense	NGG	GAACGGGTACAGCGTGACCC	5	RNA1	AD49ZG	RGEN-seq
chr7:134296615-134296634	134296617	11	11	antisense	NAG	GAGTTGGAGCAGAGTGACCA	5	RNA1	AD49ZG	RGEN-seq
chr7:136459420-136459439	136459436	9	9	sense	NGG	GGCTGGGAAGAGAGAGACTG	5	RNA1	AD49ZG	RGEN-seq
chr7:144804231-144804250	144804247	25	25	sense	NAG	AGGAGGGAACAGGGTGACTG	4	RNA1	AD49ZG	RGEN-seq
chr7:144866939-144866958	144866955	37	36	sense	NGG	GCCAGGGCACAGAGTGACCA	5	RNA1	AD49ZG	RGEN-seq
chr7:145263330-145263349	145263346	49	49	sense	NAG	TGTGGGGGACAGAGTGACAG	5	RNA1	AD49ZG	RGEN-seq
chr7:145476510-145476529	145476512	72	69	antisense	NGG	GGGAGAGAGGAGAGTGACCT	5	RNA1	AD49ZG	RGEN-seq
chr7:146711305-146711324	146711321	361	354	sense	NGG	GGACAGAAACAGGGTGACTG	5	RNA1	AD49ZG	RGEN-seq
chr8:2392399-2392418	2392401	79	79	antisense	NAG	AGGCTGAATCAAAGTGACCG	5	RNA1	AD49ZG	RGEN-seq
chr8:5562609-5562628	5562625	17	16	sense	NAG	GGGAAAGAGCAGAGTGACTG	5	RNA1	AD49ZG	RGEN-seq
chr8:26083478-26083497	26083480	279	276	antisense	NGG	GGAAAGGAACAGAGTGATAG	5	RNA1	AD49ZG	RGEN-seq
chr8:28996196-28996215	28996198	90	89	antisense	NGG	TGGTGGGATCAGAGTGAAAG	5	RNA1	AD49ZG	RGEN-seq
chr8:31454839-31454858	31454841	97	95	antisense	NGG	GAGGTGAAACATAGTGACCG	5	RNA1	AD49ZG	RGEN-seq
chr8:35596568-35596587	35596570	7	7	antisense	NGG	GGTAGGAAACAGAGACACCG	5	RNA1	AD49ZG	RGEN-seq
chr8:35645622-35645641	35645624	22	21	antisense	NGG	TAGCTGGAACAGAGTGAGCA	5	RNA1	AD49ZG	RGEN-seq
chr8:40611991-40612010	40612007	46	42	sense	NGG	GGGGCGGGCCAGAGTGACAG	5	RNA1	AD49ZG	RGEN-seq
chr8:49731521-49731540	49731523	224	217	antisense	NGG	GTGTGGGAACACAGTGACAG	4	RNA1	AD49ZG	RGEN-seq
chr8:51225377-51225396	51225393	88	87	sense	NGG	GCGCAGGACCAGAGAGATCG	5	RNA1	AD49ZG	RGEN-seq
chr8:55808899-55808918	55808901	3	3	antisense	NGG	GGGAGGGAACTGAGTATCAG	5	RNA1	AD49ZG	RGEN-seq
chr8:57127559-57127578	57127575	3	3	sense	NAG	GTGCAGGAAGAGAGTGAACA	5	RNA1	AD49ZG	RGEN-seq
chr8:62395078-62395097	62395094	106	68	sense	NAG	GGGGGGGAACAGAGAGACCA	3	RNA1	AD49ZG	RGEN-seq
chr8:66416949-66416968	66416965	29	29	sense	NAG	CGGGGGAAACAGAGAGACAG	5	RNA1	AD49ZG	RGEN-seq
chr8:67371170-67371189	67371186	17	17	sense	NGG	GGGAGTGACCAGATTGACCT	5	RNA1	AD49ZG	RGEN-seq
chr8:68463642-68463661	68463644	61	60	antisense	NGG	CGGCGGGTACAGAGTGGCAG	4	RNA1	AD49ZG	RGEN-seq
chr8:68768534-68768553	68768536	300	299	antisense	NGG	GGGAGGAAAAAGAGAGACCC	5	RNA1	AD49ZG	RGEN-seq
chr8:69196434-69196453	69196436	186	184	antisense	NGG	GGGATGGAACACAATGACCA	5	RNA1	AD49ZG	RGEN-seq
chr8:69410939-69410958	69410941	331	326	antisense	NGG	GAGCGGTAGCAGAGTAACCC	5	RNA1	AD49ZG	RGEN-seq
chr8:72353644-72353663	72353646	23	23	antisense	NGG	AGGGAGGAACAGAGTGAGGG	5	RNA1	AD49ZG	RGEN-seq
chr8:73315981-73316000	73315983	6	6	antisense	NAG	GAGCAGGAGCAGAGTGAACT	5	RNA1	AD49ZG	RGEN-seq
chr8:74349293-74349312	74349309	6	6	sense	NGG	GGGAGGGAAGAAAGTGAACA	5	RNA1	AD49ZG	RGEN-seq
chr8:83121019-83121038	83121035	237	236	sense	NAG	GGCTGAGAACACAGTGACCA	5	RNA1	AD49ZG	RGEN-seq
chr8:83613430-83613449	83613446	27	26	sense	NAG	GGCTGGGAGTAGAGAGACCG	5	RNA1	AD49ZG	RGEN-seq
chr8:88231216-88231235	88231232	30	30	sense	NGG	TGGCAGGAGCAGCGTGACCT	5	RNA1	AD49ZG	RGEN-seq
chr8:96741547-96741566	96741563	9	8	sense	NGG	GGGCAGGAGGAGAGTGACAC	5	RNA1	AD49ZG	RGEN-seq
chr9:1929183-1929202	1929185	71	71	antisense	NGG	AGTGGGTAACAGAATGACCG	5	RNA1	AD49ZG	RGEN-seq
chr9:2977978-2977997	2977980	21	19	antisense	NAG	GGGATGGTACAGAGAGACAG	5	RNA1	AD49ZG	RGEN-seq
chr9:4321537-4321556	4321539	15	14	antisense	NGG	GGGCAAGAACTTACTGACCG	5	RNA1	AD49ZG	RGEN-seq
chr9:6231279-6231298	6231295	127	125	sense	NGG	AGGACAGAACAGTGTGACCG	5	RNA1	AD49ZG	RGEN-seq
chr9:17526826-17526845	17526842	499	496	sense	NGG	GGACAGAAACAGAGTGACAC	5	RNA1	AD49ZG	RGEN-seq
chr10:936536-936555	936552	10	9	sense	NGG	AGGCAGGAACAGCGTGAGCC	5	RNA1	AD49ZG	RGEN-seq
chr10:2457863-2457882	2457865	158	157	antisense	NGG	GAGAGGCAAGAGAGAGACCG	5	RNA1	AD49ZG	RGEN-seq
chr10:4434951-4434970	4434953	7	5	antisense	NAG	GGGCGGCACAAGGGTGACCT	5	RNA1	AD49ZG	RGEN-seq
chr10:10499251-10499270	10499267	44	44	sense	NGG	GGGCGTGGTCAGAGTGACTG	4	RNA1	AD49ZG	RGEN-seq
chr10:12466694-12466713	12466710	334	330	sense	NGG	AGGCTGGCACAGAGGGACCA	5	RNA1	AD49ZG	RGEN-seq
chr10:13433150-13433169	13433152	450	440	antisense	NGG	GAGTGGGTACAGAGAGACCC	5	RNA1	AD49ZG	RGEN-seq
chrX:10789631-10789650	10789647	236	230	sense	NAG	GGAAGGAAAAAGAGTGACAG	5	RNA1	AD49ZG	RGEN-seq
chrX:12592586-12592605	12592588	101	99	antisense	NGG	GGTTGAGAACAGAGTGATTG	5	RNA1	AD49ZG	RGEN-seq
chrX:14661254-14661273	14661270	39	38	sense	NAG	GAAAGGGAGCAGAGTGACAG	5	RNA1	AD49ZG	RGEN-seq
chrX:15263120-15263139	15263136	4	4	sense	NAG	GGGCAGGGACAGGGTGACAA	5	RNA1	AD49ZG	RGEN-seq
chrX:23229045-23229064	23229061	7	5	sense	NGG	GAGCGGGAAGGGAGTGACAC	5	RNA1	AD49ZG	RGEN-seq
chrX:25207950-25207969	25207966	10	9	sense	NGG	TGGGGAGAACAGAGGGAGCG	5	RNA1	AD49ZG	RGEN-seq
chrX:35410935-35410954	35410951	145	144	sense	NGG	CACCAGGAACAGAGTGACCG	4	RNA1	AD49ZG	RGEN-seq
chrX:43120026-43120045	43120042	206	199	sense	NGG	AGGCAGAAACAGAGTGATCA	5	RNA1	AD49ZG	RGEN-seq
chrX:57126101-57126120	57126103	13	13	antisense	NGG	GGGCTGGAACAAAATGAACA	5	RNA1	AD49ZG	RGEN-seq
chrX:93130886-93130905	93130902	16	16	sense	NGG	GGGAGAGAACAGACTGACTA	5	RNA1	AD49ZG	RGEN-seq
chrX:105241063-105241082	105241065	181	180	antisense	NGG	CTGGAGGAACAGAGTGACTG	5	RNA1	AD49ZG	RGEN-seq
chrX:106379305-106379324	106379307	13	13	antisense	NAG	GGCAAAGAACAGAGTGACTG	5	RNA1	AD49ZG	RGEN-seq
chrX:109676173-109676192	109676189	14	6	sense	NAG	GTTTGGAAACAGAGTGACAG	5	RNA1	AD49ZG	RGEN-seq
chrX:114310727-114310746	114310729	4	3	antisense	NGG	GGTGGGGAAGAGAGTGAACA	5	RNA1	AD49ZG	RGEN-seq
chrX:124729571-124729590	124729573	38	38	antisense	NGG	GGACTGCAACAGAATGACCA	5	RNA1	AD49ZG	RGEN-seq
chrX:130728065-130728084	130728081	26	26	sense	NGG	GGCCTGGAATAAAGTGACCA	5	RNA1	AD49ZG	RGEN-seq
chrY:725664-725683	725680	50	28	sense	NAG	GGGAGGGTCCAGAGTGACCT	4	RNA1	AD49ZG	RGEN-seq
chrY:2843360-2843379	2843376	82	81	sense	NGG	AAGCGGGAACAGAGTGGCAG	4	RNA1	AD49ZG	RGEN-seq
chrY:5575691-5575710	5575693	257	256	antisense	NGG	GGGCAGGCACAGTGAGACCG	4	RNA1	AD49ZG	RGEN-seq
chrY:5852121-5852140	5852123	62	59	antisense	NGG	TGGCGGGAGAAGAGTGACCC	4	RNA1	AD49ZG	RGEN-seq
chrY:11877982-11878001	11877984	81	61	antisense	NAG	GGGCTATCACAGAGTGACAG	5	RNA1	AD49ZG	RGEN-seq
chrY:14831245-14831264	14831261	9	9	sense	NGG	GGTGGGGGACAGAGGGACCA	5	RNA1	AD49ZG	RGEN-seq
chrY:16909455-16909474	16909457	152	148	antisense	NGG	GGGAGAGGACAGAGTGACAA	5	RNA1	AD49ZG	RGEN-seq
chrY:17591231-17591250	17591247	14	9	sense	NGG	GGAAGGGTACAGAGGGACGG	5	RNA1	AD49ZG	RGEN-seq
chrY:20990902-20990921	20990904	3	3	antisense	NGG	AGGAGGGGACCGAGTGACGG	5	RNA1	AD49ZG	RGEN-seq
chrY:22146421-22146440	22146423	12	12	antisense	NAG	GGAGGAGAACACAGTGAACG	5	RNA1	AD49ZG	RGEN-seq
chrY:22468653-22468672	22468669	4	4	sense	NGG	GGGGGGGAACAGAGTGCCGA	4	RNA1	AD49ZG	RGEN-seq
chrV:5773-5792	5775	616	605	antisense	NGG	GGGCGGGAACAGAGTGACCG	0	RNA1	AD49ZG	RGEN-seq
chr0:1329110-1329129	1329126	41	39	sense	NGG	CCTTTTTAAAGACTAGAAAG	5	RNA2	AD49ZG	RGEN-seq
chr0:2500769-2500788	2500771	333	332	antisense	NGG	GAAGCTGAAAGAAGGGAAAG	5	RNA2	AD49ZG	RGEN-seq
chr0:4423551-4423570	4423567	15	15	sense	NAG	AATGCTGAGAGATTGGAGAG	5	RNA2	AD49ZG	RGEN-seq
chr0:4896129-4896148	4896131	19	19	antisense	NGG	TCTGAGGACAGACTAGACAG	5	RNA2	AD49ZG	RGEN-seq
chr0:5410148-5410167	5410150	26	25	antisense	NGG	TCTGTTTAGAAACTAGAAAG	5	RNA2	AD49ZG	RGEN-seq
chr0:5972068-5972087	5972084	420	418	sense	NGG	GGTTCTGAAAGAATGGAAAA	5	RNA2	AD49ZG	RGEN-seq
chr0:9087843-9087862	9087845	12	12	antisense	NGG	TCTGTAGCAAAACTGGGAAG	5	RNA2	AD49ZG	RGEN-seq
chr0:9504578-9504597	9504594	7	7	sense	NGG	TATGTTGAGGGACTGGAATG	5	RNA2	AD49ZG	RGEN-seq
chr0:12573699-12573718	12573715	7	7	sense	NGG	TCTTTTGAAAGACTGGAGTT	5	RNA2	AD49ZG	RGEN-seq
chr0:13764115-13764134	13764131	7	7	sense	NGG	TCTGCTAAAAGACTGATTGG	5	RNA2	AD49ZG	RGEN-seq
chr0:16434236-16434255	16434238	153	148	antisense	NGG	GGTGCTGACAAACTGGAAAG	4	RNA2	AD49ZG	RGEN-seq
chr0:18355692-18355711	18355694	7	7	antisense	NAG	TCAGCAGGAAGACTGGAGTG	5	RNA2	AD49ZG	RGEN-seq
chr0:19265824-19265843	19265826	7	7	antisense	NGG	TCACTTGAAAGACTGTAATG	5	RNA2	AD49ZG	RGEN-seq
chr0:19875606-19875625	19875608	50	50	antisense	NGG	TTTGGAGAAAGACAGGAATG	5	RNA2	AD49ZG	RGEN-seq
chr0:20274837-20274856	20274839	142	141	antisense	NGG	CATGCAGAAAGATGGGAAAG	5	RNA2	AD49ZG	RGEN-seq
chr0:20800927-20800946	20800943	288	287	sense	NGG	TCTGGAGGAAGACTGAAAAG	4	RNA2	AD49ZG	RGEN-seq
chr0:21266029-21266048	21266045	157	157	sense	NGG	CCCTGTGAAAGACTGCAAAG	5	RNA2	AD49ZG	RGEN-seq
chr0:21416416-21416435	21416432	18	17	sense	NGG	TCAGAATAAAAACTGGAAAG	5	RNA2	AD49ZG	RGEN-seq
chr0:21422209-21422228	21422211	3	3	antisense	NGG	TCTACAGAAAGAAGGGAAGG	5	RNA2	AD49ZG	RGEN-seq
chr0:23411177-23411196	23411193	326	324	sense	NGG	TCTCCTAAAACACTGATAAG	5	RNA2	AD49ZG	RGEN-seq
chr0:24931214-24931233	24931216	3	3	antisense	NAG	GATTCTGAAAGATGGGAAAG	5	RNA2	AD49ZG	RGEN-seq
chr0:27461875-27461894	27461877	15	15	antisense	NGG	TCTGCTAATAGACTGTCCAG	5	RNA2	AD49ZG	RGEN-seq
chr0:30683457-30683476	30683473	56	56	sense	NAG	TCTTCTGAAAGGAAGGAAAG	4	RNA2	AD49ZG	RGEN-seq
chr0:34169374-34169393	34169376	402	399	antisense	NAG	ATGGCTGGAAAACTGGAAAG	5	RNA2	AD49ZG	RGEN-seq
chr0:34296346-34296365	34296348	57	57	antisense	NGG	TGTGCTGAAAGGCAGGAAAA	4	RNA2	AD49ZG	RGEN-seq
chr0:35625742-35625761	35625758	168	168	sense	NGG	GCTGTATAAAGACTAGAAAG	5	RNA2	AD49ZG	RGEN-seq
chr0:35822092-35822111	35822094	3	3	antisense	NAG	ATTGTTGGAGGACTGGAAAG	5	RNA2	AD49ZG	RGEN-seq
chr0:36662043-36662062	36662045	188	186	antisense	NGG	TCACAAGAAAAACTGGAAAG	5	RNA2	AD49ZG	RGEN-seq
chr0:37849376-37849395	37849392	4	4	sense	NGG	TCAGATTAAAGACAGGTAAG	5	RNA2	AD49ZG	RGEN-seq
chr0:39698304-39698323	39698320	23	23	sense	NAG	TATTCTAGAAGACTGAAAAG	5	RNA2	AD49ZG	RGEN-seq
chr0:44516987-44517006	44516989	421	418	antisense	NGG	CCTGATGGAAGACTGAAAAA	5	RNA2	AD49ZG	RGEN-seq
chr0:45201401-45201420	45201417	16	16	sense	NGG	CCTGCTGAAGGAATATAAAG	5	RNA2	AD49ZG	RGEN-seq
chr0:47781413-47781432	47781429	7	6	sense	NAG	AATGCTGAATGGCTGGAAAT	5	RNA2	AD49ZG	RGEN-seq
chr0:48552729-48552748	48552731	167	166	antisense	NGG	CATGATGGAAGACTGGAAAC	5	RNA2	AD49ZG	RGEN-seq
chr0:49918250-49918269	49918252	26	18	antisense	NGG	TCTWATGAAAGACAGAAAGG	5	RNA2	AD49ZG	RGEN-seq
chr0:50516100-50516119	50516116	9	9	sense	NGG	TCTGATGAGAGACAAAAAAG	5	RNA2	AD49ZG	RGEN-seq
chr0:62466364-62466383	62466380	79	79	sense	NAG	TCCCCTGAAAGACAAGAAAG	4	RNA2	AD49ZG	RGEN-seq
chr0:64467782-64467801	64467798	91	91	sense	NGG	TTTGCTAAGAGAATGGAAAA	5	RNA2	AD49ZG	RGEN-seq
chr0:65842258-65842277	65842260	4	4	antisense	NGG	TTTCTTTAAATACTGGAAAG	5	RNA2	AD49ZG	RGEN-seq
chr0:67439252-67439271	67439254	136	136	antisense	NGG	TCTGATAATAGACTGGGAAT	5	RNA2	AD49ZG	RGEN-seq
chr0:70423028-70423047	70423030	5	5	antisense	NGG	TCAGGTGAAAGACTGGCACA	5	RNA2	AD49ZG	RGEN-seq
chr0:71234913-71234932	71234929	228	227	sense	NGG	ATTGCTGAATGAATGGAAGG	5	RNA2	AD49ZG	RGEN-seq
chr0:72716229-72716248	72716231	214	212	antisense	NGG	CATGCAGAAATACTGGGAAG	5	RNA2	AD49ZG	RGEN-seq
chr0:74289827-74289846	74289843	281	279	sense	NAG	ACTGAAGCAAGACTGAAAAG	5	RNA2	AD49ZG	RGEN-seq
chr0:75174477-75174496	75174493	74	73	sense	NAG	CCCGCTGAGAAACTGGAAAC	5	RNA2	AD49ZG	RGEN-seq
chr0:75530545-75530564	75530547	107	107	antisense	NGG	TGTGCAGAAAGACACAAAAG	5	RNA2	AD49ZG	RGEN-seq
chr0:75721600-75721619	75721616	28	28	sense	NAG	AATGCTGTCAGACTGGTAAG	5	RNA2	AD49ZG	RGEN-seq
chr0:77272271-77272290	77272287	284	281	sense	NGG	TCTACTGTCAGACTGGAAAC	4	RNA2	AD49ZG	RGEN-seq
chr0:77954719-77954738	77954721	8	8	antisense	NAG	TCTACAGACAGACAGGAAAT	5	RNA2	AD49ZG	RGEN-seq
chr0:79153326-79153345	79153342	540	536	sense	NAG	CACACTGAAAAACTGGAAAG	5	RNA2	AD49ZG	RGEN-seq
chr0:80680700-80680719	80680716	514	514	sense	NAG	TATACTAAAAGAATGGAAAG	4	RNA2	AD49ZG	RGEN-seq
chr0:81224132-81224151	81224148	4	4	sense	NGG	TCTGCAGAAATGCTGGACAG	4	RNA2	AD49ZG	RGEN-seq
chr0:82211148-82211167	82211150	207	205	antisense	NGG	AATCCTGAAATACTGGATAG	5	RNA2	AD49ZG	RGEN-seq
chr0:85178491-85178510	85178493	96	95	antisense	NGG	TCTAATGAGAGACAGAAAAG	5	RNA2	AD49ZG	RGEN-seq
chr0:87500370-87500389	87500372	111	96	antisense	NAG	TGTGCTGCAAGACTGGGAAT	4	RNA2	AD49ZG	RGEN-seq
chr0:88959430-88959449	88959432	455	449	antisense	NGG	CCAACTGGAAGACTGGAAAG	4	RNA2	AD49ZG	RGEN-seq
chr0:90334742-90334761	90334758	278	269	sense	NGG	TATGCAGGAAGACTAGATAG	5	RNA2	AD49ZG	RGEN-seq
chr0:91163509-91163528	91163525	596	594	sense	NGG	AATGCTGAAATACTGCAAAG	4	RNA2	AD49ZG	RGEN-seq
chr0:91175467-91175486	91175483	351	349	sense	NGG	TCTAATGAAAGACCGAAAAG	4	RNA2	AD49ZG	RGEN-seq
chr0:95611300-95611319	95611302	290	285	antisense	NAG	TCTCCTGAGAGACAGGAAAG	3	RNA2	AD49ZG	RGEN-seq
chr0:95743307-95743326	95743323	28	28	sense	NAG	TATGTAGGAAAACTGGAAAG	5	RNA2	AD49ZG	RGEN-seq
chr0:97364452-97364471	97364468	64	64	sense	NAG	GTTGCTAAAAGAATGGATAG	5	RNA2	AD49ZG	RGEN-seq
chr0:99106181-99106200	99106197	4	4	sense	NGG	TGTGCTGAGGGACTGGTGAG	5	RNA2	AD49ZG	RGEN-seq
chr0:101940332-101940351	101940348	32	32	sense	NGG	TCTAGTGAGAGACAGAAAAG	5	RNA2	AD49ZG	RGEN-seq
chr0:105517745-105517764	105517761	15	14	sense	NGG	TGAACTCAAAGCCTGGAAAG	5	RNA2	AD49ZG	RGEN-seq
chr0:106405761-106405780	106405763	6	6	antisense	NGG	TGTGAACAAAGCCTGGAAAG	5	RNA2	AD49ZG	RGEN-seq
chr0:107660744-107660763	107660746	9	9	antisense	NAG	TCAGAAGAAACACTGGAAAT	5	RNA2	AD49ZG	RGEN-seq
chr0:108086581-108086600	108086583	6	6	antisense	NGG	TGTCCTGAAAGGCAGAAAAG	5	RNA2	AD49ZG	RGEN-seq
chr0:110615510-110615529	110615526	189	187	sense	NAG	TCTAATGAAAGACAGAAAAG	4	RNA2	AD49ZG	RGEN-seq
chr0:116111645-116111664	116111661	92	91	sense	NGG	TCTGATAGAAGAAAGGAAAG	5	RNA2	AD49ZG	RGEN-seq
chr0:116567487-116567506	116567489	51	50	antisense	NAG	TCTTATGAAAGACTGAAGAG	4	RNA2	AD49ZG	RGEN-seq
chr0:120599515-120599534	120599531	191	191	sense	NGG	TCTGCTGGAAGACTGTATAA	4	RNA2	AD49ZG	RGEN-seq
chr0:121470754-121470773	121470756	33	33	antisense	NAG	GCCTCTGAAAAACTGGAGAG	5	RNA2	AD49ZG	RGEN-seq
chr0:122416093-122416112	122416095	84	84	antisense	NGG	CCTACTTACAGACTGGAAAC	5	RNA2	AD49ZG	RGEN-seq
chr0:122756589-122756608	122756591	386	382	antisense	NGG	TTTGAAAAAAGACTGGAAGG	5	RNA2	AD49ZG	RGEN-seq
chr0:127516049-127516068	127516065	3	3	sense	NAG	TCTACAGAAAGGCTTGAAAG	4	RNA2	AD49ZG	RGEN-seq
chr0:133076269-133076288	133076285	11	11	sense	NAG	ACAGCTAAAACACTGGAGAG	5	RNA2	AD49ZG	RGEN-seq
chr0:134348954-134348973	134348970	7	7	sense	NGG	CCTGCCCAAATACTTGAAAG	5	RNA2	AD49ZG	RGEN-seq
chr0:134635523-134635542	134635539	300	298	sense	NGG	TCTACTGACAGACTGAAATG	4	RNA2	AD49ZG	RGEN-seq
chr0:135119849-135119868	135119851	8	8	antisense	NGG	TCTGCTAATATACTGTCAAG	5	RNA2	AD49ZG	RGEN-seq
chr0:136713151-136713170	136713167	4	4	sense	NAG	TTAGCTGAATGAATAGAAAG	5	RNA2	AD49ZG	RGEN-seq
chr0:139091203-139091222	139091219	12	12	sense	NGG	TGTGTTGAGAAACTGGACAG	5	RNA2	AD49ZG	RGEN-seq
chr0:141054667-141054686	141054683	279	278	sense	NGG	GCTGCTGTCAGACTGGAGAG	4	RNA2	AD49ZG	RGEN-seq
chr0:141513263-141513282	141513265	22	21	antisense	NGG	TGAGCTGGAAGACTGGAGAC	5	RNA2	AD49ZG	RGEN-seq
chr0:141902162-141902181	141902164	15	14	antisense	NGG	GCAGCAGGAAGAGTGGAAAG	5	RNA2	AD49ZG	RGEN-seq
chr0:142269117-142269136	142269119	3	3	antisense	NGG	TCTGGTGATAGAATGAATAG	5	RNA2	AD49ZG	RGEN-seq
chr0:142477058-142477077	142477074	39	39	sense	NGG	TCAGCAGAAAGAAAGGAAAA	5	RNA2	AD49ZG	RGEN-seq
chr0:143499830-143499849	143499846	69	69	sense	NAG	TCTTCATAAAGACTGAAAAG	4	RNA2	AD49ZG	RGEN-seq
chr0:143782944-143782963	143782946	50	50	antisense	NGG	GCTGAGGAAAGACTGGCCAG	5	RNA2	AD49ZG	RGEN-seq
chr0:144567241-144567260	144567257	19	19	sense	NGG	TCTGCAAACAGACAGGAAAT	5	RNA2	AD49ZG	RGEN-seq
chr0:149291113-149291132	149291129	8	8	sense	NGG	GCAGCTCAAAGAGTAGAAAG	5	RNA2	AD49ZG	RGEN-seq
chr0:150110165-150110184	150110181	41	41	sense	NGG	TCAGAAGAAAGAATGGGAAG	5	RNA2	AD49ZG	RGEN-seq
chr0:151317119-151317138	151317121	3	3	antisense	NAG	TGTGCTATAAGAAAGGAAAG	5	RNA2	AD49ZG	RGEN-seq
chr0:151560093-151560112	151560109	7	7	sense	NGG	TTCCCTCAACGACTGGAAAG	5	RNA2	AD49ZG	RGEN-seq
chr0:151934860-151934879	151934876	14	14	sense	NGG	GCTGATGGAAGGCTGGGAAG	5	RNA2	AD49ZG	RGEN-seq
chr0:152586540-152586559	152586542	457	456	antisense	NGG	TCTGCTGATACACTGAAGAG	4	RNA2	AD49ZG	RGEN-seq
chr0:154189621-154189640	154189623	3	3	antisense	NGG	TATGCAGAAAGACTCTAAAT	5	RNA2	AD49ZG	RGEN-seq
chr0:154726336-154726355	154726352	24	24	sense	NGG	TATGCTGAAAGAAAAGAAAC	5	RNA2	AD49ZG	RGEN-seq
chr0:154972560-154972579	154972576	5	5	sense	NGG	TCTACTAAGGGAGTGGAAAG	5	RNA2	AD49ZG	RGEN-seq
chr0:155062485-155062504	155062501	10	10	sense	NGG	GTTTCTGCTAGACTGGAAAG	5	RNA2	AD49ZG	RGEN-seq
chr0:155486259-155486278	155486275	416	413	sense	NGG	TATACTGAGAGACAGAAAAG	5	RNA2	AD49ZG	RGEN-seq
chr0:156265616-156265635	156265632	45	45	sense	NAG	TCTTATGAGAGACTAAAAAG	5	RNA2	AD49ZG	RGEN-seq
chr0:156508234-156508253	156508236	18	18	antisense	NGG	ACTATGGAGAGACTGGAAAG	5	RNA2	AD49ZG	RGEN-seq
chr0:159852567-159852586	159852569	8	7	antisense	NGG	TCTCCTGGAAGAAAGAAAAG	5	RNA2	AD49ZG	RGEN-seq
chr0:163554587-163554606	163554603	380	376	sense	NGG	ACTGATGATAGACTAGAAAT	5	RNA2	AD49ZG	RGEN-seq
chr0:163808083-163808102	163808099	11	11	sense	NAG	TCTATTAAAAGACTGAAAAT	5	RNA2	AD49ZG	RGEN-seq
chr0:166390855-166390874	166390871	50	49	sense	NAG	CCACCAGAAACACTGGAAAG	5	RNA2	AD49ZG	RGEN-seq
chr0:166435839-166435858	166435855	47	46	sense	NGG	TCCACTGAAAGAGGGGAAAG	4	RNA2	AD49ZG	RGEN-seq
chr0:168925376-168925395	168925378	19	19	antisense	NAG	TCAGCTGTAAAACTGTAAAG	4	RNA2	AD49ZG	RGEN-seq
chr0:169226491-169226510	169226507	6	6	sense	NAG	TTTGCTCAAAGGCTGGAAAA	4	RNA2	AD49ZG	RGEN-seq
chr0:169401970-169401989	169401972	174	172	antisense	NAG	TCTTCTGGAAAACTGGAAAC	4	RNA2	AD49ZG	RGEN-seq
chr0:173042558-173042577	173042574	10	10	sense	NAG	TTTCATCAAAGACTGTAAAG	5	RNA2	AD49ZG	RGEN-seq
chr0:173080658-173080677	173080660	261	261	antisense	NGG	TTTGCAGAAAGACTGGCATG	4	RNA2	AD49ZG	RGEN-seq
chr0:173964027-173964046	173964043	39	39	sense	NGG	GCTGCTGAGAGACTGCCAAG	4	RNA2	AD49ZG	RGEN-seq
chr0:174565325-174565344	174565327	30	29	antisense	NGG	TCTTCTAAAAGACTGGAATT	4	RNA2	AD49ZG	RGEN-seq
chr0:178776169-178776188	178776171	56	54	antisense	NGG	TGTCAAGAAAGAATGGAAAG	5	RNA2	AD49ZG	RGEN-seq
chr0:179118759-179118778	179118761	279	272	antisense	NGG	CATGCAAAAAGACAGGAAAG	5	RNA2	AD49ZG	RGEN-seq
chr0:181336369-181336388	181336385	139	138	sense	NGG	TCTGATTAATGACTGGGAAG	4	RNA2	AD49ZG	RGEN-seq
chr0:181603489-181603508	181603491	339	336	antisense	NGG	CCTGCCTGAAGGCTGGAAAG	5	RNA2	AD49ZG	RGEN-seq
chr0:182101117-182101136	182101133	49	48	sense	NGG	TATGAGGAGAGACTGGAAAG	4	RNA2	AD49ZG	RGEN-seq
chr0:182896852-182896871	182896868	54	54	sense	NGG	TGTGCAGAAGCACTGGAATG	5	RNA2	AD49ZG	RGEN-seq
chr0:184489162-184489181	184489178	25	25	sense	NGG	TTAGTTCAAAGACTGGAGAG	5	RNA2	AD49ZG	RGEN-seq
chr0:185382679-185382698	185382695	302	297	sense	NGG	TTTGCTGGAAAATTGAAAAG	5	RNA2	AD49ZG	RGEN-seq
chr0:185645769-185645788	185645771	20	20	antisense	NGG	TCTGAAGAAAGGCTAGAAGG	5	RNA2	AD49ZG	RGEN-seq
chr0:186089537-186089556	186089553	5	5	sense	NGG	TGTTCTGAAGGACAAGAAAG	5	RNA2	AD49ZG	RGEN-seq
chr0:187638266-187638285	187638282	5	5	sense	NGG	GCTGCTGAAACACTGGTGTG	5	RNA2	AD49ZG	RGEN-seq
chr0:189335222-189335241	189335238	178	177	sense	NGG	TTCTCTGAAAGACAGGACAG	5	RNA2	AD49ZG	RGEN-seq
chr0:189772214-189772233	189772230	4	3	sense	NGG	TCTGCCGGGAGTTTGGAAAG	5	RNA2	AD49ZG	RGEN-seq
chr0:191166442-191166461	191166458	11	11	sense	NGG	TTGACTAAATGACTGGAAAG	5	RNA2	AD49ZG	RGEN-seq
chr0:195130401-195130420	195130403	17	17	antisense	NGG	TTGGCTGAGAGAATGGGAAG	5	RNA2	AD49ZG	RGEN-seq
chr0:195871579-195871598	195871595	3	3	sense	NAG	TCTACAGATAAACTGGCAAG	5	RNA2	AD49ZG	RGEN-seq
chr0:195990427-195990446	195990443	7	7	sense	NAG	TCAGGCCAAAGACTGGAAAA	5	RNA2	AD49ZG	RGEN-seq
chr0:197733084-197733103	197733100	417	415	sense	NGG	TTTACTGATACACTGGAAAG	4	RNA2	AD49ZG	RGEN-seq
chr0:199867555-199867574	199867557	56	56	antisense	NGG	GCTCCTCAAAGATTGGAATG	5	RNA2	AD49ZG	RGEN-seq
chr0:201763957-201763976	201763959	90	90	antisense	NAG	AATGCTGAGAGACTAGAGAG	5	RNA2	AD49ZG	RGEN-seq
chr0:202282795-202282814	202282811	305	303	sense	NGG	TCTACTGATAAACTGAAAAG	4	RNA2	AD49ZG	RGEN-seq
chr0:202703011-202703030	202703013	235	232	antisense	NGG	TCTGAGAAAAGACTCAAAAG	5	RNA2	AD49ZG	RGEN-seq
chr0:203373927-203373946	203373943	32	31	sense	NGG	TCTGCTTAAATACTGTATAG	4	RNA2	AD49ZG	RGEN-seq
chr0:206203589-206203608	206203591	3	3	antisense	NAG	GTTGCTGAAAGACAGCAAAG	4	RNA2	AD49ZG	RGEN-seq
chr0:210655826-210655845	210655828	76	74	antisense	NAG	TGTGCTGAGAGACTGGACAA	4	RNA2	AD49ZG	RGEN-seq
chr0:211413277-211413296	211413279	386	215	antisense	NAG	TCACTGGAAAGACTGGAAAA	5	RNA2	AD49ZG	RGEN-seq
chr0:212359244-212359263	212359260	18	18	sense	NAG	ACTTGTGGAATACTGGAAAG	5	RNA2	AD49ZG	RGEN-seq
chr0:212894406-212894425	212894408	293	293	antisense	NAG	GCTGCAGGAAAACTGAAAAG	5	RNA2	AD49ZG	RGEN-seq
chr0:214173681-214173700	214173683	339	336	antisense	NAG	TATGCAAAAAGACTGGAAAG	3	RNA2	AD49ZG	RGEN-seq
chr0:216512670-216512689	216512672	136	136	antisense	NAG	AGTGATGAAACATTGGAAAG	5	RNA2	AD49ZG	RGEN-seq
chr0:220422157-220422176	220422173	18	18	sense	NGG	TCTGCTTGAAGATTAGAGAG	5	RNA2	AD49ZG	RGEN-seq
chr0:221723317-221723336	221723333	130	124	sense	NAG	ACTTCTGAAACATTGGAAAT	5	RNA2	AD49ZG	RGEN-seq
chr0:222126546-222126565	222126562	45	45	sense	NAG	AATGCACAAAGACAGGAAAG	5	RNA2	AD49ZG	RGEN-seq
chr0:222353058-222353077	222353074	97	96	sense	NAG	TTTGCTTAAATACTGGAAAA	4	RNA2	AD49ZG	RGEN-seq
chr0:225030768-225030787	225030770	7	7	antisense	NGG	TCTTATTCAAGACTGGCAAG	5	RNA2	AD49ZG	RGEN-seq
chr0:226027193-226027212	226027209	338	334	sense	NGG	GCTGGTGAAAGACAAGAAAG	4	RNA2	AD49ZG	RGEN-seq
chr0:226600044-226600063	226600060	386	383	sense	NGG	AATGCTGAAAAACTAGACAG	5	RNA2	AD49ZG	RGEN-seq
chr0:228054221-228054240	228054237	5	3	sense	NAG	TCAGCATAAAGACTAGAAAC	5	RNA2	AD49ZG	RGEN-seq
chr0:229620667-229620686	229620683	22	22	sense	NGG	TCTCCTGCAAGACTGAGGAG	5	RNA2	AD49ZG	RGEN-seq
chr0:230071403-230071422	230071419	109	107	sense	NGG	TCTGCCTAAAGAATGGAAAC	4	RNA2	AD49ZG	RGEN-seq
chr0:231757068-231757087	231757070	521	514	antisense	NGG	GATGCAGAAAGACTAGACAG	5	RNA2	AD49ZG	RGEN-seq
chr0:232631500-232631519	232631502	87	87	antisense	NAG	ATTGCTGAGAGATTAGAAAG	5	RNA2	AD49ZG	RGEN-seq
chr0:232703590-232703609	232703606	411	407	sense	NGG	TGCCTTGAAAGAATGGAAAG	5	RNA2	AD49ZG	RGEN-seq
chr0:237336501-237336520	237336517	397	393	sense	NAG	TCTTGCTAAAGACTGGAAAG	4	RNA2	AD49ZG	RGEN-seq
chr0:237385284-237385303	237385286	6	6	antisense	NAG	CTTGCTGGAAGACTTGAAAA	5	RNA2	AD49ZG	RGEN-seq
chr0:238314287-238314306	238314303	185	183	sense	NGG	TTTGTTGTAAGACTGGAATG	4	RNA2	AD49ZG	RGEN-seq
chr0:239594227-239594246	239594229	3	3	antisense	NAG	TATGTTAAAGGACTAGAAAG	5	RNA2	AD49ZG	RGEN-seq
chr0:239947039-239947058	239947041	179	178	antisense	NAG	TCTACTGTAAGAATGGAAAG	3	RNA2	AD49ZG	RGEN-seq
chr0:243657574-243657593	243657590	126	124	sense	NAG	ATGGCTGAAGGACTAGAAAG	5	RNA2	AD49ZG	RGEN-seq
chr0:246028579-246028598	246028581	26	26	antisense	NGG	TGTGCAGACAGACTGAACAG	5	RNA2	AD49ZG	RGEN-seq
chr0:246971796-246971815	246971798	9	9	antisense	NGG	GCTGCTGAAAATTTAGAAAG	5	RNA2	AD49ZG	RGEN-seq
chr0:248003270-248003289	248003272	46	44	antisense	NAG	CCTGCTACAAGGCTGAAAAG	5	RNA2	AD49ZG	RGEN-seq
chr0:250202302-250202321	250202318	66	64	sense	NGG	TATGTTGAAAGAAAGGAAAT	5	RNA2	AD49ZG	RGEN-seq
chr0:259058852-259058871	259058854	6	6	antisense	NGG	TCTGGATAAATACTGGATAG	5	RNA2	AD49ZG	RGEN-seq
chr0:263321679-263321698	263321695	388	386	sense	NAG	ACACATGAAAGACTGAAAAG	5	RNA2	AD49ZG	RGEN-seq
chr0:264845515-264845534	264845517	4	4	antisense	NGG	TCTTCTGACAAAATGGAAAT	5	RNA2	AD49ZG	RGEN-seq
chr0:265100627-265100646	265100643	12	12	sense	NGG	TGTGCTTGAAGACTGGAGAA	5	RNA2	AD49ZG	RGEN-seq
chr0:267044849-267044868	267044851	9	9	antisense	NGG	TCTGATGAACTACTGGCAAG	4	RNA2	AD49ZG	RGEN-seq
chr0:269882506-269882525	269882522	30	30	sense	NGG	TCTCCTGAGTGACTGGTAAG	4	RNA2	AD49ZG	RGEN-seq
chr0:270578980-270578999	270578982	9	9	antisense	NAG	TTTAATGAAAGACAGAAAAG	5	RNA2	AD49ZG	RGEN-seq
chr0:272881434-272881453	272881450	26	25	sense	NAG	GCAGGTGATAGACTGGAATG	5	RNA2	AD49ZG	RGEN-seq
chr0:273138631-273138650	273138633	385	382	antisense	NGG	TCTGCTGTAAAACTGGAAAG	2	RNA2	AD49ZG	RGEN-seq
chr0:275385511-275385530	275385513	47	47	antisense	NGG	TTTGCAGTAAGACAGGAAGG	5	RNA2	AD49ZG	RGEN-seq
chr0:278285863-278285882	278285879	31	31	sense	NAG	TCTGCTAAGAAACTAGAAAG	4	RNA2	AD49ZG	RGEN-seq
chr0:278397633-278397652	278397649	10	10	sense	NGG	TCTACTGAATGCCTGAAAAA	5	RNA2	AD49ZG	RGEN-seq
chr0:279923377-279923396	279923379	421	420	antisense	NAG	GGTGAAGAAAGACTAGAAAG	5	RNA2	AD49ZG	RGEN-seq
chr0:280041181-280041200	280041197	320	317	sense	NGG	ATTGGTGAAAAACTGGAAAA	5	RNA2	AD49ZG	RGEN-seq
chr0:280279742-280279761	280279758	4	4	sense	NGG	GGTGCTGAAATACTGCAAAC	5	RNA2	AD49ZG	RGEN-seq
chr0:280688983-280689002	280688999	229	227	sense	NGG	TCCACTGGAACACTGGAAAT	5	RNA2	AD49ZG	RGEN-seq
chr1:910963-910982	910965	11	11	antisense	NAG	TCTAATGAGAGACAGAAAAG	5	RNA2	AD49ZG	RGEN-seq
chr1:985041-985060	985057	3	3	sense	NAG	TCTACTTAATGACTAGAATG	5	RNA2	AD49ZG	RGEN-seq
chr1:7847884-7847903	7847900	126	125	sense	NGG	TCTGAAGAAAAGCTGGGAAG	5	RNA2	AD49ZG	RGEN-seq
chr1:10339197-10339216	10339199	5	5	antisense	NGG	TTTTCTGTAACACTGGAATG	5	RNA2	AD49ZG	RGEN-seq
chr1:19972777-19972796	19972793	175	174	sense	NAG	CCAGAAGAAAGAATGGAAAG	5	RNA2	AD49ZG	RGEN-seq
chr1:20942888-20942907	20942890	13	12	antisense	NAG	GATGCTGAGATACTGGATAG	5	RNA2	AD49ZG	RGEN-seq
chr1:22215198-22215217	22215200	78	77	antisense	NGG	ACTGCTCAGAGGCTGAAAAG	5	RNA2	AD49ZG	RGEN-seq
chr1:24016456-24016475	24016458	3	3	antisense	NAG	ATTGTTGGAAGACTGGAAGG	5	RNA2	AD49ZG	RGEN-seq
chr1:24280476-24280495	24280492	4	4	sense	NGG	TCTGAGGTAAGACTGGGAAC	5	RNA2	AD49ZG	RGEN-seq
chr1:24772669-24772688	24772685	51	51	sense	NGG	ACTGCTCAGAGACTGGCCAG	5	RNA2	AD49ZG	RGEN-seq
chr1:25300325-25300344	25300327	178	178	antisense	NGG	AATGCTGATAGGCTGGAAAC	5	RNA2	AD49ZG	RGEN-seq
chr1:28384355-28384374	28384371	11	11	sense	NAG	CTGGCTGAAAGACTAGAAGG	5	RNA2	AD49ZG	RGEN-seq
chr1:30605946-30605965	30605962	112	112	sense	NGG	TCAGATGATAGACTGGCATG	5	RNA2	AD49ZG	RGEN-seq
chr1:30666425-30666444	30666441	20	20	sense	NAG	ACTAGTGAGAGACTGGAAGG	5	RNA2	AD49ZG	RGEN-seq
chr1:34296167-34296186	34296183	88	87	sense	NGG	TCTTGTGGAAGACTGAAAAG	4	RNA2	AD49ZG	RGEN-seq
chr1:35016150-35016169	35016166	121	121	sense	NGG	TCTGCATAAATACTGAAAAT	5	RNA2	AD49ZG	RGEN-seq
chr1:39545172-39545191	39545174	4	4	antisense	NAG	TCTACACAGAGACTGGAAGG	5	RNA2	AD49ZG	RGEN-seq
chr1:44214642-44214661	44214658	10	10	sense	NAG	ACTGCAGAGTGACAGGAAAG	5	RNA2	AD49ZG	RGEN-seq
chr1:44443672-44443691	44443674	5	5	antisense	NGG	TCTGCTGATAGACTGTCCAG	4	RNA2	AD49ZG	RGEN-seq
chr1:49070494-49070513	49070510	220	216	sense	NAG	GTTGCTGAGAGACTGGAAGA	5	RNA2	AD49ZG	RGEN-seq
chr1:50147865-50147884	50147881	12	12	sense	NGG	TCTACTGAAAAATTGAGAAG	5	RNA2	AD49ZG	RGEN-seq
chr1:51296961-51296980	51296977	27	27	sense	NGG	TATGCTGTCAGACAGGAGAG	5	RNA2	AD49ZG	RGEN-seq
chr1:51959405-51959424	51959421	109	108	sense	NGG	AGTGCTGAGACACTGGAAGG	5	RNA2	AD49ZG	RGEN-seq
chr1:53045250-53045269	53045252	7	7	antisense	NAG	AATGCTGAGAGATTGGAGAG	5	RNA2	AD49ZG	RGEN-seq
chr1:55099051-55099070	55099053	344	342	antisense	NGG	TCTGTTGAGAAACTGGAAAA	4	RNA2	AD49ZG	RGEN-seq
chr1:55150127-55150146	55150143	355	350	sense	NGG	TTAGCTGAAAGACTGGAAAA	3	RNA2	AD49ZG	RGEN-seq
chr1:56607573-56607592	56607589	137	136	sense	NGG	TCTGCTATAAGTCTGGACAG	4	RNA2	AD49ZG	RGEN-seq
chr1:58012490-58012509	58012492	369	365	antisense	NGG	CCTGCTATCAGACTGGAAAT	5	RNA2	AD49ZG	RGEN-seq
chr1:59258355-59258374	59258371	17	17	sense	NAG	TGTGAAGAGAAACTGGAAAG	5	RNA2	AD49ZG	RGEN-seq
chr1:65508137-65508156	65508153	16	16	sense	NGG	TCAGATGACAGATTAGAAAG	5	RNA2	AD49ZG	RGEN-seq
chr1:68225929-68225948	68225945	59	59	sense	NGG	TCTAGGGAAAGACAGAAAAG	5	RNA2	AD49ZG	RGEN-seq
chr1:68280338-68280357	68280354	23	13	sense	NAG	TATGATCAAAGACTGGGAAG	4	RNA2	AD49ZG	RGEN-seq
chr1:68603541-68603560	68603543	4	4	antisense	NGG	ACTGCTGACAAACAGGACAG	5	RNA2	AD49ZG	RGEN-seq
chr1:70799550-70799569	70799566	7	7	sense	NGG	TCTGTTGAGTGACTGGAAGA	5	RNA2	AD49ZG	RGEN-seq
chr1:71417731-71417750	71417747	8	7	sense	NAG	CCCTCAGAAAGACAGGAAAG	5	RNA2	AD49ZG	RGEN-seq
chr1:71901546-71901565	71901548	267	264	antisense	NAG	CCTGTTGAAAGAATGAAAAG	4	RNA2	AD49ZG	RGEN-seq
chr1:73456326-73456345	73456328	286	285	antisense	NGG	ATTGCTTGAAGACTGAAAAG	5	RNA2	AD49ZG	RGEN-seq
chr1:75338942-75338961	75338944	75	75	antisense	NGG	CCTCATGGAAGACTGGAATG	5	RNA2	AD49ZG	RGEN-seq
chr1:76170088-76170107	76170090	103	102	antisense	NAG	TGTGCTGGAAAACTGGGAAG	4	RNA2	AD49ZG	RGEN-seq
chr1:76202941-76202960	76202943	84	84	antisense	NGG	TCTACCTGAAGACAGGAAAG	5	RNA2	AD49ZG	RGEN-seq
chr1:76371986-76372005	76372002	9	9	sense	NAG	TCCTATTAAAGACTGGATAG	5	RNA2	AD49ZG	RGEN-seq
chr1:78289440-78289459	78289456	11	11	sense	NAG	TGTAGAGATAGACTGGAAAG	5	RNA2	AD49ZG	RGEN-seq
chr1:79678286-79678305	79678302	6	6	sense	NGG	AGTGCTGACAGCCAGGAAAG	5	RNA2	AD49ZG	RGEN-seq
chr1:80613390-80613409	80613392	363	360	antisense	NGG	GATGCAGGAAAACTGGAAAG	5	RNA2	AD49ZG	RGEN-seq
chr1:86348087-86348106	86348103	3	3	sense	NGG	TCTGCGCAAAGATAGGAGAG	5	RNA2	AD49ZG	RGEN-seq
chr1:88470234-88470253	88470236	5	5	antisense	NAG	ATTTCTGAAAGACAGGAAAT	5	RNA2	AD49ZG	RGEN-seq
chr1:89616829-89616848	89616845	12	12	sense	NGG	TCTGCTGCCAAACTGGGATG	5	RNA2	AD49ZG	RGEN-seq
chr1:89749366-89749385	89749382	85	85	sense	NGG	TGTGTTGAAAGACTGGTTAT	5	RNA2	AD49ZG	RGEN-seq
chr1:90808445-90808464	90808461	9	9	sense	NGG	GCAGCTGAAAGCCTGGCATG	5	RNA2	AD49ZG	RGEN-seq
chr1:91015356-91015375	91015358	41	40	antisense	NGG	TCTGCTAAGAGACTGCAAAC	4	RNA2	AD49ZG	RGEN-seq
chr1:91444631-91444650	91444647	220	220	sense	NGG	TCTACTAATGGACTGGAAAA	5	RNA2	AD49ZG	RGEN-seq
chr1:91519306-91519325	91519308	52	51	antisense	NGG	AGTGCTGCAAGACCGGAAAT	5	RNA2	AD49ZG	RGEN-seq
chr1:92852878-92852897	92852880	123	123	antisense	NGG	TCCATTAAAAGACTGGCAAG	5	RNA2	AD49ZG	RGEN-seq
chr1:93561971-93561990	93561987	162	162	sense	NAG	GCTGCTAGATGACTGAAAAG	5	RNA2	AD49ZG	RGEN-seq
chr1:96267002-96267021	96267004	108	107	antisense	NGG	AGTGATGAAAGACTGGCAGG	5	RNA2	AD49ZG	RGEN-seq
chr1:97306895-97306914	97306911	12	12	sense	NGG	TCTATTTAATGACTGGAAAA	5	RNA2	AD49ZG	RGEN-seq
chr1:98660062-98660081	98660064	151	151	antisense	NGG	CCCACTGCAAGACTGGAAAG	4	RNA2	AD49ZG	RGEN-seq
chr1:100851213-100851232	100851229	33	31	sense	NAG	ACTGCTAAAAGACTGAAAAA	4	RNA2	AD49ZG	RGEN-seq
chr1:102950741-102950760	102950757	108	108	sense	NAG	TATGCCAAAAAACTGGACAG	5	RNA2	AD49ZG	RGEN-seq
chr1:103932414-103932433	103932416	194	193	antisense	NGG	TGGGCAGAAAGACTGGACAA	5	RNA2	AD49ZG	RGEN-seq
chr1:105955825-105955844	105955841	61	61	sense	NGG	GCTGCTGAGAGATTGAAAAA	5	RNA2	AD49ZG	RGEN-seq
chr1:109929735-109929754	109929737	255	253	antisense	NGG	GCAGCTGAACAACTGGGAAG	5	RNA2	AD49ZG	RGEN-seq
chr1:113126645-113126664	113126661	76	73	sense	NAG	TGTTCTGAAACACTGGAATG	4	RNA2	AD49ZG	RGEN-seq
chr1:113858953-113858972	113858969	6	6	sense	NAG	TATGACCAAATACTGGAAAG	5	RNA2	AD49ZG	RGEN-seq
chr1:115522869-115522888	115522871	16	16	antisense	NGG	TATAATAAGAGACTGGAAAG	5	RNA2	AD49ZG	RGEN-seq
chr1:115940496-115940515	115940512	52	52	sense	NAG	CCTGCAAAAAGACTGGACAG	4	RNA2	AD49ZG	RGEN-seq
chr1:116312947-116312966	116312963	97	97	sense	NGG	CCTGCAGCCAGACTGGAAAG	4	RNA2	AD49ZG	RGEN-seq
chr1:117844074-117844093	117844090	8	8	sense	NGG	TCAGTAGAAGGACTGGAAGG	5	RNA2	AD49ZG	RGEN-seq
chr1:117976124-117976143	117976140	238	231	sense	NAG	GCAGCTGGAAGACTGGATAG	4	RNA2	AD49ZG	RGEN-seq
chr1:120154419-120154438	120154421	639	638	antisense	NGG	TATGGAGAAAGACTAGAAAA	5	RNA2	AD49ZG	RGEN-seq
chr1:120321993-120322012	120322009	5	5	sense	NGG	TATGCTAAAAGGTTGCAAAG	5	RNA2	AD49ZG	RGEN-seq
chr1:122634078-122634097	122634080	171	171	antisense	NGG	CCAGCTGATAGACTGGGGAG	5	RNA2	AD49ZG	RGEN-seq
chr1:123363168-123363187	123363170	25	25	antisense	NAG	GTTCCTTAAAGACTGGATAG	5	RNA2	AD49ZG	RGEN-seq
chr1:123562752-123562771	123562768	407	400	sense	NGG	TCTGCTGAAAGAAGGGAAAG	2	RNA2	AD49ZG	RGEN-seq
chr1:125280158-125280177	125280160	38	37	antisense	NAG	GATACTGAAAGATGGGAAAG	5	RNA2	AD49ZG	RGEN-seq
chr1:125300544-125300563	125300560	494	489	sense	NGG	TTAGCTGAAAAAGTGGAAAG	4	RNA2	AD49ZG	RGEN-seq
chr1:126549530-126549549	126549546	47	46	sense	NGG	TCTAATGAGAGACAGAAAAG	5	RNA2	AD49ZG	RGEN-seq
chr1:128862666-128862685	128862682	156	154	sense	NGG	TCTGCTATAAAACTGGAATC	5	RNA2	AD49ZG	RGEN-seq
chr1:128877585-128877604	128877587	20	20	antisense	NGG	TCAAAGGAAACACTGGAAAG	5	RNA2	AD49ZG	RGEN-seq
chr1:129958861-129958880	129958877	192	190	sense	NGG	AGAGATGAAGGACTGGAAAG	5	RNA2	AD49ZG	RGEN-seq
chr1:130034176-130034195	130034192	71	70	sense	NAG	TCTGCAGAAAGCCAGGAAAG	3	RNA2	AD49ZG	RGEN-seq
chr1:130940434-130940453	130940450	165	165	sense	NAG	TCAGCAGAGAAACTGAAAAG	5	RNA2	AD49ZG	RGEN-seq
chr1:132337682-132337701	132337698	70	70	sense	NGG	TCTGCCCAACCACTGGAAAG	4	RNA2	AD49ZG	RGEN-seq
chr1:133914660-133914679	133914662	3	3	antisense	NAG	TCTTATGAAAGACAGGAATA	5	RNA2	AD49ZG	RGEN-seq
chr1:133960568-133960587	133960570	517	511	antisense	NGG	TCTAATGAAAGACTGAAATG	4	RNA2	AD49ZG	RGEN-seq
chr1:134420537-134420556	134420553	185	181	sense	NGG	CTTGCTGAAACACAGGAAAT	5	RNA2	AD49ZG	RGEN-seq
chr1:134670689-134670708	134670705	575	573	sense	NGG	TTGGCAGAAAGACTGAAAAA	5	RNA2	AD49ZG	RGEN-seq
chr1:137187553-137187572	137187569	10	8	sense	NGG	TGTGATGAAAGGCAAGAAAG	5	RNA2	AD49ZG	RGEN-seq
chr1:143934598-143934617	143934600	338	338	antisense	NAG	TCTACTAAAATACTGGTAAG	4	RNA2	AD49ZG	RGEN-seq
chr1:144662042-144662061	144662044	230	229	antisense	NGG	GAGGGTGAAAGCCTGGAAAG	5	RNA2	AD49ZG	RGEN-seq
chr1:145151686-145151705	145151688	11	11	antisense	NGG	TTTGCTAAAAGAATGTAAAA	5	RNA2	AD49ZG	RGEN-seq
chr1:147013083-147013102	147013099	251	246	sense	NAG	CTCACTGAAAGAATGGAAAG	5	RNA2	AD49ZG	RGEN-seq
chr1:149116594-149116613	149116610	288	286	sense	NAG	GCTGCTGTAAGACTGGAAAA	3	RNA2	AD49ZG	RGEN-seq
chr1:151172164-151172183	151172180	249	248	sense	NAG	GGGGCTGAAAGACTGGAAGA	5	RNA2	AD49ZG	RGEN-seq
chr1:151397610-151397629	151397612	4	4	antisense	NGG	TCACATGAAAGAGTGGAAAT	5	RNA2	AD49ZG	RGEN-seq
chr1:153174811-153174830	153174813	9	6	antisense	NGG	TCCTCAGAATGACTGGAAAC	5	RNA2	AD49ZG	RGEN-seq
chr1:153233202-153233221	153233218	314	263	sense	NGG	ACAGCTTAAAGAAAGGAAAG	5	RNA2	AD49ZG	RGEN-seq
chr1:154852507-154852526	154852523	138	136	sense	NAG	TTTGCAGAAAGGCTAGAAAG	4	RNA2	AD49ZG	RGEN-seq
chr1:155708845-155708864	155708847	5	5	antisense	NGG	GCTGTTGATAAAATGGAAAG	5	RNA2	AD49ZG	RGEN-seq
chr1:156187103-156187122	156187119	4	4	sense	NGG	TCTGGGGAAAGGCTGGAGAA	5	RNA2	AD49ZG	RGEN-seq
chr1:156453053-156453072	156453069	5	5	sense	NGG	TCTTTTTAAAGACTGAGAAG	5	RNA2	AD49ZG	RGEN-seq
chr1:156776542-156776561	156776558	460	455	sense	NAG	ATGGCTGGAAGACTGGAATG	5	RNA2	AD49ZG	RGEN-seq
chr1:157144072-157144091	157144074	286	282	antisense	NAG	TTAGCTGAAGGACTAGAAAG	4	RNA2	AD49ZG	RGEN-seq
chr1:157862335-157862354	157862337	242	238	antisense	NGG	CTTGCTATAAGACAGGAAAG	5	RNA2	AD49ZG	RGEN-seq
chr1:159879587-159879606	159879589	143	140	antisense	NGG	TCTATGCAAAGACTGGAAAG	4	RNA2	AD49ZG	RGEN-seq
chr1:160562530-160562549	160562546	53	53	sense	NAG	TCTGCTTTAAGACTGAAAAT	4	RNA2	AD49ZG	RGEN-seq
chr1:161240210-161240229	161240226	8	8	sense	NAG	ACTGAGGAAGTACTGGAAAG	5	RNA2	AD49ZG	RGEN-seq
chr1:161875489-161875508	161875505	465	463	sense	NGG	TATGATGAAATACTGGAAAA	4	RNA2	AD49ZG	RGEN-seq
chr1:163475613-163475632	163475615	48	35	antisense	NAG	TCCACAGAAAGATTGGATAG	5	RNA2	AD49ZG	RGEN-seq
chr1:165915432-165915451	165915434	101	99	antisense	NGG	TCTTCTGAAAGACTAGTAAA	4	RNA2	AD49ZG	RGEN-seq
chr1:166590801-166590820	166590817	129	126	sense	NAG	GTTACTGAAACATTGGAAAG	5	RNA2	AD49ZG	RGEN-seq
chr1:167353177-167353196	167353179	18	17	antisense	NAG	TCAGCGGAAAGACTGAAAAT	4	RNA2	AD49ZG	RGEN-seq
chr1:170589207-170589226	170589223	279	262	sense	NAG	GATACTGAAACACTGGGAAG	5	RNA2	AD49ZG	RGEN-seq
chr1:170782801-170782820	170782817	6	6	sense	NGG	TCTACTGAAATAGAAGAAAG	5	RNA2	AD49ZG	RGEN-seq
chr1:171091568-171091587	171091584	15	15	sense	NAG	AGTTCTAAAAGACTGGAAAC	5	RNA2	AD49ZG	RGEN-seq
chr1:172336159-172336178	172336175	6	6	sense	NAG	TCTGTAGAAGGAATGGAAAC	5	RNA2	AD49ZG	RGEN-seq
chr1:174378940-174378959	174378942	4	4	antisense	NAG	AATGCTGGAAGATTGGAGAG	5	RNA2	AD49ZG	RGEN-seq
chr1:175255876-175255895	175255892	46	46	sense	NGG	TCTCCTATAAAACTGAAAAG	5	RNA2	AD49ZG	RGEN-seq
chr1:175829361-175829380	175829377	6	6	sense	NGG	ACTGCTGACTGACTTGAGAG	5	RNA2	AD49ZG	RGEN-seq
chr1:177274732-177274751	177274748	6	6	sense	NGG	GCTGTTCAAAGACAGGAATG	5	RNA2	AD49ZG	RGEN-seq
chr1:178992251-178992270	178992267	8	6	sense	NAG	TCTGATGAAAGACTTGTAAT	4	RNA2	AD49ZG	RGEN-seq
chr1:181537541-181537560	181537557	188	185	sense	NGG	TCTGCTATAAGGCTGGAATA	5	RNA2	AD49ZG	RGEN-seq
chr1:181898617-181898636	181898619	5	5	antisense	NAG	ACTTCTTAAAGACAGGAAAT	5	RNA2	AD49ZG	RGEN-seq
chr1:182707446-182707465	182707448	21	21	antisense	NAG	GGAGTTGAAAGACTGGAAAT	5	RNA2	AD49ZG	RGEN-seq
chr1:184534237-184534256	184534239	190	190	antisense	NAG	AGTGCTGTAAGACTAGGAAG	5	RNA2	AD49ZG	RGEN-seq
chr1:187687522-187687541	187687538	6	6	sense	NAG	TGTACTGAAAGACAGAAAAA	5	RNA2	AD49ZG	RGEN-seq
chr1:190821438-190821457	190821440	15	15	antisense	NAG	TCTGCTGAGAAACTGAAATG	4	RNA2	AD49ZG	RGEN-seq
chr1:191239846-191239865	191239848	10	10	antisense	NAG	TATACTGAAACACTAGAGAG	5	RNA2	AD49ZG	RGEN-seq
chr1:192067546-192067565	192067562	263	262	sense	NGG	TCTGCTAGAAAACTGGAGAA	5	RNA2	AD49ZG	RGEN-seq
chr1:194557105-194557124	194557107	94	93	antisense	NAG	GCTGCTGGTAGCCTGGAAAG	4	RNA2	AD49ZG	RGEN-seq
chr1:195482236-195482255	195482252	3	3	sense	NGG	TTTGATTAAAGACTTGAAGG	5	RNA2	AD49ZG	RGEN-seq
chr1:197030655-197030674	197030657	36	36	antisense	NAG	ACTTCTGAGAAACTGGAAAT	5	RNA2	AD49ZG	RGEN-seq
chr1:197034114-197034133	197034130	4	4	sense	NAG	TCTAATGAGAGACAGAAAAG	5	RNA2	AD49ZG	RGEN-seq
chr1:197128968-197128987	197128970	5	4	antisense	NGG	TCTGCTTAGGGACTGGATAC	5	RNA2	AD49ZG	RGEN-seq
chr1:197417937-197417956	197417939	16	15	antisense	NGG	GCTATTGAGAGACTTGAAAG	5	RNA2	AD49ZG	RGEN-seq
chr1:198422747-198422766	198422749	15	15	antisense	NAG	TTTACTAAAAGATTGTAAAG	5	RNA2	AD49ZG	RGEN-seq
chr1:198843391-198843410	198843393	37	36	antisense	NGG	TCAGCTGTAAGAGTGGAAAA	4	RNA2	AD49ZG	RGEN-seq
chr1:201184459-201184478	201184475	61	56	sense	NAG	ACTATTGAAAGACTGGAGAA	5	RNA2	AD49ZG	RGEN-seq
chr1:204370254-204370273	204370270	918	911	sense	NGG	AAAGCAGAAAGACTGGAAAA	5	RNA2	AD49ZG	RGEN-seq
chr1:206364382-206364401	206364398	37	36	sense	NGG	TCTGCTTGTAGACTGGGGAG	5	RNA2	AD49ZG	RGEN-seq
chr1:206423069-206423088	206423085	6	6	sense	NGG	CCTGCTGAGAAACTGGCAGG	5	RNA2	AD49ZG	RGEN-seq
chr1:209779530-209779549	209779546	11	11	sense	NGG	TCTCCTGAAATATTGGAAGA	5	RNA2	AD49ZG	RGEN-seq
chr1:210709193-210709212	210709209	4	4	sense	NAG	TCTAATGAGAGACAGAAAAG	5	RNA2	AD49ZG	RGEN-seq
chr1:212426461-212426480	212426477	5	5	sense	NGG	TTTGCTGAAGGATGGGAAAG	4	RNA2	AD49ZG	RGEN-seq
chr1:212782896-212782915	212782912	4	4	sense	NAG	TCTGATGAAAGAAAGAAAAG	4	RNA2	AD49ZG	RGEN-seq
chr1:214467013-214467032	214467015	168	166	antisense	NGG	TCCTGTGAATGACTGGAAAA	5	RNA2	AD49ZG	RGEN-seq
chr1:217415358-217415377	217415374	163	161	sense	NGG	GTTGCTGAAAGACTGGGAGA	5	RNA2	AD49ZG	RGEN-seq
chr1:221961123-221961142	221961125	102	102	antisense	NGG	TCCACAGGAACACTGGAAAG	5	RNA2	AD49ZG	RGEN-seq
chr1:222421644-222421663	222421646	86	84	antisense	NGG	ACTATTAAAAGACAGGAAAG	5	RNA2	AD49ZG	RGEN-seq
chr1:223175481-223175500	223175497	203	201	sense	NGG	ACTTCTGAAAAACTACAAAG	5	RNA2	AD49ZG	RGEN-seq
chr1:225822853-225822872	225822869	505	502	sense	NAG	ACAACTGAAAAACTGGAAAG	4	RNA2	AD49ZG	RGEN-seq
chr1:227148889-227148908	227148905	11	9	sense	NAG	TGTGCTGAAAGAAAGGAAGG	4	RNA2	AD49ZG	RGEN-seq
chr1:228352097-228352116	228352113	3	3	sense	NGG	CCAGCTGTAAGAATGTAAAG	5	RNA2	AD49ZG	RGEN-seq
chr1:229082599-229082618	229082615	420	418	sense	NGG	TCTGCTGAGAGACAGAAAAG	3	RNA2	AD49ZG	RGEN-seq
chr1:229112820-229112839	229112836	5	5	sense	NAG	TTTGGGCAAAGACTGAAAAG	5	RNA2	AD49ZG	RGEN-seq
chr1:231535784-231535803	231535786	10	8	antisense	NGG	TCAGATGAAAAACTTGAAAA	5	RNA2	AD49ZG	RGEN-seq
chr1:235390574-235390593	235390576	4	3	antisense	NAG	TAAGCTCCAAGAATGGAAAG	5	RNA2	AD49ZG	RGEN-seq
chr1:236137550-236137569	236137566	3	3	sense	NGG	TGTGGTGAAAGACTGGGGAG	4	RNA2	AD49ZG	RGEN-seq
chr1:236468153-236468172	236468155	67	67	antisense	NGG	GATGATGACAGAATGGAAAG	5	RNA2	AD49ZG	RGEN-seq
chr1:236667958-236667977	236667960	8	5	antisense	NAG	TATGCTGAAAGGCTGCGAAA	5	RNA2	AD49ZG	RGEN-seq
chr1:236757710-236757729	236757712	296	293	antisense	NAG	CCAGCCTAAAGACTGGGAAG	5	RNA2	AD49ZG	RGEN-seq
chr1:238282012-238282031	238282014	16	16	antisense	NAG	CCATCTGAAAGACAGGGAAG	5	RNA2	AD49ZG	RGEN-seq
chr1:244385931-244385950	244385933	12	12	antisense	NGG	TCTGGAAAGAGACAGGAAAG	5	RNA2	AD49ZG	RGEN-seq
chr1:244968970-244968989	244968972	272	221	antisense	NGG	TCAGCTGAGAGACTGGATAT	4	RNA2	AD49ZG	RGEN-seq
chr1:248073680-248073699	248073682	643	637	antisense	NAG	GAGGCTGAAAGACTGGAAAG	3	RNA2	AD49ZG	RGEN-seq
chr1:250068828-250068847	250068830	552	547	antisense	NGG	ATTTCTGAAAAACTGGAAAT	5	RNA2	AD49ZG	RGEN-seq
chr1:251282445-251282464	251282447	298	296	antisense	NGG	TCTAATGAGAGACAGGAAAG	4	RNA2	AD49ZG	RGEN-seq
chr1:254059427-254059446	254059429	294	293	antisense	NGG	GATGCTAAAAGTCTAGAAAG	5	RNA2	AD49ZG	RGEN-seq
chr1:254426015-254426034	254426031	77	75	sense	NAG	TCTGCTCAGAGACAGGAAAA	4	RNA2	AD49ZG	RGEN-seq
chr1:256478555-256478574	256478571	57	57	sense	NGG	TCAGATGTAAGAATGGAAAG	4	RNA2	AD49ZG	RGEN-seq
chr1:258090552-258090571	258090568	5	5	sense	NAG	TCTGGTAAAAGGCTGGGAAG	4	RNA2	AD49ZG	RGEN-seq
chr1:258719408-258719427	258719410	142	139	antisense	NGG	TCTGTGGAGAAACTGGGAAG	5	RNA2	AD49ZG	RGEN-seq
chr1:260399141-260399160	260399157	17	17	sense	NAG	CCTACTGGGAGACTGGAAAC	5	RNA2	AD49ZG	RGEN-seq
chr1:263505228-263505247	263505244	31	31	sense	NGG	CATGCTGAAGGAGAGGAAAG	5	RNA2	AD49ZG	RGEN-seq
chr1:272657415-272657434	272657417	257	257	antisense	NGG	GCTGCAGAAGAACTGGAAAA	5	RNA2	AD49ZG	RGEN-seq
chr1:273424120-273424139	273424122	27	27	antisense	NAG	AGTGCTGAACAATTGGAAAG	5	RNA2	AD49ZG	RGEN-seq
chr1:276399977-276399996	276399993	6	6	sense	NGG	TCTGCTGAGGGCCTGAAAAG	4	RNA2	AD49ZG	RGEN-seq
chr1:276551594-276551613	276551610	49	48	sense	NAG	ACAGCTGAACAACTGGATAG	5	RNA2	AD49ZG	RGEN-seq
chr1:279214335-279214354	279214337	5	5	antisense	NGG	TCTGATGAAAGTATGAAAAT	5	RNA2	AD49ZG	RGEN-seq
chr2:3013081-3013100	3013097	255	254	sense	NGG	AGTGCTGAAGAACTGGACAG	5	RNA2	AD49ZG	RGEN-seq
chr2:3306230-3306249	3306232	47	46	antisense	NGG	CCAGCTGAATGACTGTAAAT	5	RNA2	AD49ZG	RGEN-seq
chr2:3401132-3401151	3401134	36	35	antisense	NAG	TCTACAGAAGAACTGGAAAA	5	RNA2	AD49ZG	RGEN-seq
chr2:3517533-3517552	3517535	140	137	antisense	NGG	ACTGGAGGAAAACTGGAAAG	5	RNA2	AD49ZG	RGEN-seq
chr2:6775729-6775748	6775745	4	4	sense	NGG	TCTCCTCAATAAATGGAAAG	5	RNA2	AD49ZG	RGEN-seq
chr2:7734673-7734692	7734675	225	223	antisense	NAG	TCACCTGAAAAACTGAAAAG	4	RNA2	AD49ZG	RGEN-seq
chr2:9293236-9293255	9293238	5	5	antisense	NAG	GGTGCTGAGTGATTGGAAAG	5	RNA2	AD49ZG	RGEN-seq
chr2:10421016-10421035	10421032	325	264	sense	NGG	GATGCTGAGAGACAGGAAAG	4	RNA2	AD49ZG	RGEN-seq
chr2:12305828-12305847	12305830	366	362	antisense	NAG	GCTGCTGAAAAACAGGAAAT	4	RNA2	AD49ZG	RGEN-seq
chr2:12323193-12323212	12323195	233	233	antisense	NGG	CATGCTGATAGACTGGCATG	5	RNA2	AD49ZG	RGEN-seq
chr2:13028269-13028288	13028285	239	238	sense	NAG	ACCACAGAAAGACTGGGAAG	5	RNA2	AD49ZG	RGEN-seq
chr2:13134583-13134602	13134599	4	4	sense	NAG	CATGCTGAAAGAAATGAAAG	5	RNA2	AD49ZG	RGEN-seq
chr2:14510835-14510854	14510837	6	5	antisense	NAG	TATGATAAAACACTGGAAGG	5	RNA2	AD49ZG	RGEN-seq
chr2:15164610-15164629	15164612	24	24	antisense	NAG	TCTTACTAAAAACTGGAAAG	5	RNA2	AD49ZG	RGEN-seq
chr2:15658280-15658299	15658282	381	380	antisense	NGG	CCAGAGGAAAGACTGGAAAT	5	RNA2	AD49ZG	RGEN-seq
chr2:15848177-15848196	15848193	36	24	sense	NAG	CCCCCTGAAAGAATGGAATG	5	RNA2	AD49ZG	RGEN-seq
chr2:17445016-17445035	17445018	15	15	antisense	NAG	GCTGCATCAAGACTGGCAAG	5	RNA2	AD49ZG	RGEN-seq
chr2:19096794-19096813	19096796	191	191	antisense	NGG	TTCCCTGAAGGACTAGAAAG	5	RNA2	AD49ZG	RGEN-seq
chr2:19542337-19542356	19542353	7	7	sense	NAG	TCTGCTGATTGACTGGAAGA	4	RNA2	AD49ZG	RGEN-seq
chr2:22948297-22948316	22948299	42	42	antisense	NGG	TCTTCTGTAAGATTGAAAAC	5	RNA2	AD49ZG	RGEN-seq
chr2:23116234-23116253	23116236	63	63	antisense	NAG	TTTGTTTAAAAACTGGAAAG	4	RNA2	AD49ZG	RGEN-seq
chr2:24528343-24528362	24528359	4	4	sense	NGG	TTTGGAAAGAGACTGGAAAG	5	RNA2	AD49ZG	RGEN-seq
chr2:26384282-26384301	26384298	335	331	sense	NGG	AAAGCTGGAAGACTGGACAG	5	RNA2	AD49ZG	RGEN-seq
chr2:28263914-28263933	28263916	9	9	antisense	NAG	AGTGTTCACAGACTGGAAAG	5	RNA2	AD49ZG	RGEN-seq
chr2:29032507-29032526	29032509	80	77	antisense	NGG	TAATGTTAAAGACTGGAAAG	5	RNA2	AD49ZG	RGEN-seq
chr2:29148245-29148264	29148247	261	256	antisense	NGG	TGAGCTGTAAAACTAGAAAG	5	RNA2	AD49ZG	RGEN-seq
chr2:33100156-33100175	33100172	106	106	sense	NGG	TCTGCAGAAGGACTGGAGAG	3	RNA2	AD49ZG	RGEN-seq
chr2:33409458-33409477	33409474	90	89	sense	NAG	TTACCTGATAGACTAGAAAG	5	RNA2	AD49ZG	RGEN-seq
chr2:33987821-33987840	33987837	24	24	sense	NGG	TGAGCGAAAAGAATGGAAAG	5	RNA2	AD49ZG	RGEN-seq
chr2:35906016-35906035	35906032	12	12	sense	NGG	TATAATGAGAGACAGGAAAG	5	RNA2	AD49ZG	RGEN-seq
chr2:36436203-36436222	36436219	102	101	sense	NAG	GATGCTAAAATAATGGAAAG	5	RNA2	AD49ZG	RGEN-seq
chr2:38565421-38565440	38565423	136	135	antisense	NGG	TCAGCTGAGTGATTGGAAAG	4	RNA2	AD49ZG	RGEN-seq
chr2:40097624-40097643	40097640	17	17	sense	NGG	TCAGCAGAAAGACTGGTATC	5	RNA2	AD49ZG	RGEN-seq
chr2:44398846-44398865	44398848	321	321	antisense	NGG	TAAGCTTAAAAACTGGAAAC	5	RNA2	AD49ZG	RGEN-seq
chr2:50393437-50393456	50393439	6	6	antisense	NAG	GCTGCAGTAAGCCTGAAAAG	5	RNA2	AD49ZG	RGEN-seq
chr2:50403350-50403369	50403366	5	5	sense	NGG	TATGTTAAAGGACTGTAAAG	5	RNA2	AD49ZG	RGEN-seq
chr2:50520202-50520221	50520218	31	31	sense	NAG	AATGCTGAGAGACTAGAGAG	5	RNA2	AD49ZG	RGEN-seq
chr2:51179975-51179994	51179991	152	152	sense	NAG	GATGATGAAAAACTGGAGAG	5	RNA2	AD49ZG	RGEN-seq
chr2:51556399-51556418	51556401	214	214	antisense	NGG	CCTGTAGAAACACTGAAAAG	5	RNA2	AD49ZG	RGEN-seq
chr2:53407087-53407106	53407103	244	242	sense	NAG	AGTGCTGAGAGACTGGAATA	5	RNA2	AD49ZG	RGEN-seq
chr2:55990043-55990062	55990059	279	278	sense	NGG	ACAGCTGAAACACAGGAAAA	5	RNA2	AD49ZG	RGEN-seq
chr2:57921361-57921380	57921363	17	16	antisense	NAG	TCTGCTGTAAGACTAGACCA	5	RNA2	AD49ZG	RGEN-seq
chr2:59920704-59920723	59920720	522	519	sense	NGG	TCTGCAGAAAGACTAAGAAG	4	RNA2	AD49ZG	RGEN-seq
chr2:60061536-60061555	60061552	313	313	sense	NGG	CCTGCAGAAAAACTGGGAAG	4	RNA2	AD49ZG	RGEN-seq
chr2:60350317-60350336	60350319	28	28	antisense	NAG	TGTAGAGAGAGACTGGAAAG	5	RNA2	AD49ZG	RGEN-seq
chr2:62472803-62472822	62472805	47	47	antisense	NAG	TCTAATGAGAGACTGAAATG	5	RNA2	AD49ZG	RGEN-seq
chr2:67288513-67288532	67288529	18	18	sense	NGG	TCTGGTGAAAAACTTATAAG	5	RNA2	AD49ZG	RGEN-seq
chr2:69715176-69715195	69715178	65	64	antisense	NGG	TCTTATGAAAAACTGGTAGG	5	RNA2	AD49ZG	RGEN-seq
chr2:70628022-70628041	70628038	120	119	sense	NGG	AGTGCTGAAAGCCAGAAAAG	5	RNA2	AD49ZG	RGEN-seq
chr2:71837850-71837869	71837866	73	73	sense	NGG	CCTGCCTAGGGACTGGAAAG	5	RNA2	AD49ZG	RGEN-seq
chr2:72296621-72296640	72296623	470	468	antisense	NGG	ACTACGGAAAGACTGGAATG	4	RNA2	AD49ZG	RGEN-seq
chr2:73559207-73559226	73559209	188	185	antisense	NGG	AGAGCTGAAAGGCAGGAAAG	5	RNA2	AD49ZG	RGEN-seq
chr2:73936690-73936709	73936692	158	157	antisense	NGG	TCTAATGAAAGACAGGAAGG	4	RNA2	AD49ZG	RGEN-seq
chr2:74069510-74069529	74069526	7	5	sense	NAG	AATGCTACAAGACTGTAAAG	5	RNA2	AD49ZG	RGEN-seq
chr2:75333575-75333594	75333577	18	17	antisense	NGG	GCGGCTGGAATACTGGGAAG	5	RNA2	AD49ZG	RGEN-seq
chr2:75344919-75344938	75344921	93	93	antisense	NGG	CCTTCTGAAAGACTCCAAAG	4	RNA2	AD49ZG	RGEN-seq
chr2:75384380-75384399	75384396	394	392	sense	NGG	GCTGCAGGAAGACAGGAAAG	4	RNA2	AD49ZG	RGEN-seq
chr2:76625578-76625597	76625594	469	468	sense	NAG	TTAGGTGAAAGACAGGAAAG	4	RNA2	AD49ZG	RGEN-seq
chr2:76697297-76697316	76697299	20	20	antisense	NAG	TCTGTGGAAAGACTGTGAAG	4	RNA2	AD49ZG	RGEN-seq
chr2:78500223-78500242	78500239	181	181	sense	NAG	TCTAATGAAAGACAGAAAAG	4	RNA2	AD49ZG	RGEN-seq
chr2:79413407-79413426	79413409	10	10	antisense	NAG	TCTGAATAAACATTGGAAAG	5	RNA2	AD49ZG	RGEN-seq
chr2:80962258-80962277	80962274	352	349	sense	NAG	TCTGTAGAAAGACAGGAAAG	3	RNA2	AD49ZG	RGEN-seq
chr2:82366030-82366049	82366046	24	23	sense	NGG	TGTGAGCAAAGACTGGAAAT	5	RNA2	AD49ZG	RGEN-seq
chr2:87146834-87146853	87146850	15	15	sense	NGG	TTTGATGATGGATTGGAAAG	5	RNA2	AD49ZG	RGEN-seq
chr2:88868717-88868736	88868733	12	12	sense	NAG	TTTGCAGACTGACTGGAAAG	4	RNA2	AD49ZG	RGEN-seq
chr2:89413305-89413324	89413307	227	226	antisense	NGG	TCTTTTGAAAGTCTGGAAAG	3	RNA2	AD49ZG	RGEN-seq
chr2:90595431-90595450	90595433	6	6	antisense	NAG	TCTGATGAAAGACTGGGAGA	4	RNA2	AD49ZG	RGEN-seq
chr2:93198220-93198239	93198236	203	198	sense	NGG	ACTGCTGAAAGAGTAGAAAG	3	RNA2	AD49ZG	RGEN-seq
chr2:93535797-93535816	93535813	3	3	sense	NGG	TGTGCTGGAAGAATGGATGG	5	RNA2	AD49ZG	RGEN-seq
chr2:95123795-95123814	95123797	332	329	antisense	NGG	GCAGCTAAAAGACAGGAAAG	4	RNA2	AD49ZG	RGEN-seq
chr2:95177155-95177174	95177171	5	5	sense	NAG	GCTTCTAAAAGGCTAGAAAG	5	RNA2	AD49ZG	RGEN-seq
chr2:99054352-99054371	99054354	335	328	antisense	NGG	CTTGTTGAAAGACTGGAACT	5	RNA2	AD49ZG	RGEN-seq
chr2:101703851-101703870	101703853	8	8	antisense	NAG	TCTAATGAGAGACAGAAAAG	5	RNA2	AD49ZG	RGEN-seq
chr2:102940431-102940450	102940447	69	68	sense	NAG	TTCACAGAAAGAATGGAAAG	5	RNA2	AD49ZG	RGEN-seq
chr2:103435487-103435506	103435503	198	196	sense	NGG	TCTACAGGAAGACTGGATGG	5	RNA2	AD49ZG	RGEN-seq
chr2:107306409-107306428	107306425	558	551	sense	NAG	TCTGACCAAAGACTGGAAAG	3	RNA2	AD49ZG	RGEN-seq
chr2:112459508-112459527	112459524	12	12	sense	NAG	TTGGTGAAAAGACTGGAAAG	5	RNA2	AD49ZG	RGEN-seq
chr2:113663315-113663334	113663331	20	20	sense	NAG	TCAGTTGAGATACTGGAAAG	4	RNA2	AD49ZG	RGEN-seq
chr2:116463319-116463338	116463335	119	119	sense	NAG	GGTGTAGAAAGACTGGAAAT	5	RNA2	AD49ZG	RGEN-seq
chr2:118942526-118942545	118942542	175	174	sense	NGG	TAAGCTGAAAGAGAGGATAG	5	RNA2	AD49ZG	RGEN-seq
chr2:120727318-120727337	120727334	15	15	sense	NGG	TCCCTTGAAAGCCTGGAATG	5	RNA2	AD49ZG	RGEN-seq
chr2:120907340-120907359	120907342	6	6	antisense	NGG	TCTGTTAAGAGCCTGGAAAC	5	RNA2	AD49ZG	RGEN-seq
chr2:120934008-120934027	120934010	4	3	antisense	NGG	GCTGCTGCAAGAGTGGTTAG	5	RNA2	AD49ZG	RGEN-seq
chr2:121714085-121714104	121714101	324	324	sense	NGG	TAAGCAGAAAGACTTGAATG	5	RNA2	AD49ZG	RGEN-seq
chr2:123470325-123470344	123470327	109	107	antisense	NGG	TCTAATGAGAGACAGAAAAG	5	RNA2	AD49ZG	RGEN-seq
chr2:123740754-123740773	123740770	108	108	sense	NGG	TCTACTGTAAGTCTGAAAAT	5	RNA2	AD49ZG	RGEN-seq
chr2:125726302-125726321	125726304	105	104	antisense	NAG	TCCTAAGAAAGAATGGAAAG	5	RNA2	AD49ZG	RGEN-seq
chr2:126413344-126413363	126413360	37	37	sense	NAG	TCTGGTCAATGACTGGAAAG	3	RNA2	AD49ZG	RGEN-seq
chr2:128363094-128363113	128363096	7	7	antisense	NGG	TCTGCATAGATACAGGAAAG	5	RNA2	AD49ZG	RGEN-seq
chr2:128789714-128789733	128789716	57	57	antisense	NAG	TCAACTGAAAGATTGGGAAG	4	RNA2	AD49ZG	RGEN-seq
chr2:129250842-129250861	129250858	162	152	sense	NGG	ACTGCTGGAAGACTGGACAC	4	RNA2	AD49ZG	RGEN-seq
chr2:131175662-131175681	131175678	167	167	sense	NGG	TCTTCTGAGAAACTGGTAAT	5	RNA2	AD49ZG	RGEN-seq
chr2:137161200-137161219	137161216	10	9	sense	NGG	TCAGATGAAAGACAGAAAGG	5	RNA2	AD49ZG	RGEN-seq
chr2:138686665-138686684	138686681	5	4	sense	NAG	CCAACTAAAAGACTGCAAAG	5	RNA2	AD49ZG	RGEN-seq
chr2:139538917-139538936	139538933	7	7	sense	NAG	CCTGTTGAAAGACTGAACTG	5	RNA2	AD49ZG	RGEN-seq
chr2:141856943-141856962	141856959	144	143	sense	NGG	TTTGAGGAAAGACTAGAAAC	5	RNA2	AD49ZG	RGEN-seq
chr2:143329991-143330010	143330007	18	17	sense	NAG	TATTCTGTAAGACTGGAAAA	4	RNA2	AD49ZG	RGEN-seq
chr2:146581417-146581436	146581419	6	5	antisense	NAG	AATGTTGAAAGACTGGGAAC	5	RNA2	AD49ZG	RGEN-seq
chr2:149021957-149021976	149021973	136	135	sense	NGG	GCAGCTTAGAGACTAGAAAG	5	RNA2	AD49ZG	RGEN-seq
chr2:151599809-151599828	151599811	6	3	antisense	NGG	CCTCCTGAAAAAATGGAAGG	5	RNA2	AD49ZG	RGEN-seq
chr2:151955590-151955609	151955606	508	504	sense	NGG	TCTGCCAGAAAACTGGAATG	5	RNA2	AD49ZG	RGEN-seq
chr2:155357443-155357462	155357459	364	359	sense	NGG	CTTGCAGAAGGACTGGAATG	5	RNA2	AD49ZG	RGEN-seq
chr2:155488340-155488359	155488356	3	3	sense	NAG	TCTAATGAGAGACAGAAAAG	5	RNA2	AD49ZG	RGEN-seq
chr2:155864742-155864761	155864758	35	35	sense	NAG	CCATCAGTAAGACTGGAAAG	5	RNA2	AD49ZG	RGEN-seq
chr2:155961566-155961585	155961582	4	4	sense	NGG	TCAGCTGAAATAATGGAGAA	5	RNA2	AD49ZG	RGEN-seq
chr2:156244777-156244796	156244793	3	3	sense	NGG	TCAGCTGGAATACTGGAGAT	5	RNA2	AD49ZG	RGEN-seq
chr2:156288648-156288667	156288664	171	170	sense	NGG	ATTTCTGAATCACTGGAAAG	5	RNA2	AD49ZG	RGEN-seq
chr2:156633909-156633928	156633925	5	5	sense	NAG	TATGAGGAAAGACTAGGAAG	5	RNA2	AD49ZG	RGEN-seq
chr2:159026900-159026919	159026916	166	165	sense	NGG	TCTCCAGAATAACTGAAAAG	5	RNA2	AD49ZG	RGEN-seq
chr2:159552021-159552040	159552037	143	143	sense	NGG	TCTGATGAGAGACAGAAAAG	4	RNA2	AD49ZG	RGEN-seq
chr2:161474859-161474878	161474875	14	14	sense	NGG	TCTCTGAAAAGACTGGTAAG	5	RNA2	AD49ZG	RGEN-seq
chr2:161881625-161881644	161881641	62	62	sense	NGG	CCTGCTGGCAGATTGGAGAG	5	RNA2	AD49ZG	RGEN-seq
chr2:164355329-164355348	164355345	137	136	sense	NGG	TGTGCTGTCAGACTAGAAAA	5	RNA2	AD49ZG	RGEN-seq
chr2:165027895-165027914	165027897	416	414	antisense	NGG	TCGGCAGAAATACTGGACAG	4	RNA2	AD49ZG	RGEN-seq
chr2:165684149-165684168	165684165	93	93	sense	NGG	TCTCCTGGGAAACTGGAATG	5	RNA2	AD49ZG	RGEN-seq
chr2:168231966-168231985	168231968	32	26	antisense	NGG	TCTGAGAAATGATTGGAAAG	5	RNA2	AD49ZG	RGEN-seq
chr2:171377307-171377326	171377309	172	170	antisense	NGG	GTTGGTGAAGGACTGGAATG	5	RNA2	AD49ZG	RGEN-seq
chr2:173088771-173088790	173088787	10	10	sense	NAG	GATGCTGAAACACTGGTAAA	5	RNA2	AD49ZG	RGEN-seq
chr2:173557422-173557441	173557438	13	13	sense	NGG	TGAACAGATAGACTGGAAAG	5	RNA2	AD49ZG	RGEN-seq
chr2:175584250-175584269	175584252	120	120	antisense	NGG	ACTGCTGCTAGACTGGGAAC	5	RNA2	AD49ZG	RGEN-seq
chr2:176530737-176530756	176530739	118	115	antisense	NGG	TATGCTGTAAGACTCCAAAG	4	RNA2	AD49ZG	RGEN-seq
chr2:179083057-179083076	179083073	511	507	sense	NAG	CCAGCAGAAAGACTGGAGAG	4	RNA2	AD49ZG	RGEN-seq
chr2:179355629-179355648	179355631	99	99	antisense	NAG	AGAGCTGCAAGACTGGAAGG	5	RNA2	AD49ZG	RGEN-seq
chr2:179879744-179879763	179879746	13	13	antisense	NGG	TCTGATGAATTACTGGAAGT	5	RNA2	AD49ZG	RGEN-seq
chr2:181835043-181835062	181835045	419	416	antisense	NGG	TCTACTGAATAGCTGGAAAG	4	RNA2	AD49ZG	RGEN-seq
chr2:187103670-187103689	187103672	318	315	antisense	NAG	AATACTGAAACACTGGAAAA	5	RNA2	AD49ZG	RGEN-seq
chr2:187595047-187595066	187595063	5	5	sense	NAG	TATTTTCAAAGACTGGAAGG	5	RNA2	AD49ZG	RGEN-seq
chr2:189861507-189861526	189861509	335	335	antisense	NGG	GGTGCTGAAGGACTGAACAG	5	RNA2	AD49ZG	RGEN-seq
chr2:190524885-190524904	190524901	3	3	sense	NGG	ACTGTTAACAGACTGCAAAG	5	RNA2	AD49ZG	RGEN-seq
chr2:190765427-190765446	190765429	49	49	antisense	NGG	TAGGTTGAAAGGCTGGATAG	5	RNA2	AD49ZG	RGEN-seq
chr2:190936017-190936036	190936033	177	175	sense	NGG	ACTGCTGAAGGGCTGAAAAG	4	RNA2	AD49ZG	RGEN-seq
chr2:192808691-192808710	192808707	20	20	sense	NAG	TCTGATAAATGACTGGAAAT	4	RNA2	AD49ZG	RGEN-seq
chr2:194565489-194565508	194565505	14	14	sense	NAG	TTTGCTGAAATATTGAAAAG	4	RNA2	AD49ZG	RGEN-seq
chr2:199265378-199265397	199265380	17	17	antisense	NGG	TCTTGGAAAAAACTGGAAAG	5	RNA2	AD49ZG	RGEN-seq
chr2:200355608-200355627	200355624	226	224	sense	NGG	TGGGCAGAAAGACTGCAAAG	4	RNA2	AD49ZG	RGEN-seq
chr2:205469572-205469591	205469588	8	8	sense	NAG	TCTGATGACAGAAAGGAAAG	4	RNA2	AD49ZG	RGEN-seq
chr2:206948747-206948766	206948749	3	3	antisense	NAG	TCTAATGAAAGATTGAAAAA	5	RNA2	AD49ZG	RGEN-seq
chr2:207052058-207052077	207052060	36	35	antisense	NGG	AATGCTGAAAGTCAGGAAAA	5	RNA2	AD49ZG	RGEN-seq
chr2:207917948-207917967	207917950	11	11	antisense	NGG	TCTAGTGTAAGACTGGAGGG	5	RNA2	AD49ZG	RGEN-seq
chr2:209798231-209798250	209798247	444	441	sense	NAG	GAAGCTGAGAGATTGGAAAG	5	RNA2	AD49ZG	RGEN-seq
chr2:210452243-210452262	210452245	16	15	antisense	NAG	TCTTCTGTAAAGCTGGAAAG	4	RNA2	AD49ZG	RGEN-seq
chr2:211134277-211134296	211134293	99	99	sense	NGG	TCTGCAGCCACACTGAAAAG	5	RNA2	AD49ZG	RGEN-seq
chr2:214300327-214300346	214300343	21	20	sense	NAG	TCTCTAGCAAGACTGAAAAG	5	RNA2	AD49ZG	RGEN-seq
chr2:215091801-215091820	215091817	54	54	sense	NGG	TCTGGGGAAAGTCTAGAAAG	4	RNA2	AD49ZG	RGEN-seq
chr2:217832069-217832088	217832085	19	18	sense	NGG	ACTTCTGAAAGGAAGGAAAG	5	RNA2	AD49ZG	RGEN-seq
chr2:220918473-220918492	220918475	4	4	antisense	NGG	TCTGCTGTAAGGCTGGGCTG	5	RNA2	AD49ZG	RGEN-seq
chr2:221097157-221097176	221097173	10	10	sense	NAG	TCTGCTGGAAAACTGAACAG	4	RNA2	AD49ZG	RGEN-seq
chr2:221523301-221523320	221523303	397	370	antisense	NAG	TTTGCTGAAAGAAATGAAAA	5	RNA2	AD49ZG	RGEN-seq
chr2:222561927-222561946	222561943	434	428	sense	NAG	CCTGATTAAAAACTGGAAAG	4	RNA2	AD49ZG	RGEN-seq
chr2:222833013-222833032	222833029	6	6	sense	NGG	GGTGCTGCAAGACTGCATAG	5	RNA2	AD49ZG	RGEN-seq
chr2:223343822-223343841	223343838	8	8	sense	NGG	TCTACACAAAGTTTGGAAAG	5	RNA2	AD49ZG	RGEN-seq
chr2:223867993-223868012	223868009	6	5	sense	NGG	CCTTCTGAACAGCTGGAAAG	5	RNA2	AD49ZG	RGEN-seq
chr2:225510946-225510965	225510962	90	90	sense	NGG	TATGTAGAAAGAATGGAAAC	5	RNA2	AD49ZG	RGEN-seq
chr2:227077844-227077863	227077860	56	55	sense	NGG	TATACTAAAAGAATTGAAAG	5	RNA2	AD49ZG	RGEN-seq
chr2:228619960-228619979	228619976	90	88	sense	NGG	TCTGATGGTAGATTGGAAAA	5	RNA2	AD49ZG	RGEN-seq
chr2:229410795-229410814	229410797	36	36	antisense	NGG	TATGTGGAAATACTGGAAAA	5	RNA2	AD49ZG	RGEN-seq
chr2:230510361-230510380	230510377	151	151	sense	NGG	TCTACATAAAGACAGGAAAA	5	RNA2	AD49ZG	RGEN-seq
chr2:231813303-231813322	231813319	81	81	sense	NGG	TTTAATGAAACACTGGAGAG	5	RNA2	AD49ZG	RGEN-seq
chr2:231847099-231847118	231847101	456	449	antisense	NAG	ACATCTAAAAGACTGGAAAT	5	RNA2	AD49ZG	RGEN-seq
chr2:234605079-234605098	234605081	70	70	antisense	NAG	CAAGGTGAAAGACAGGAAAG	5	RNA2	AD49ZG	RGEN-seq
chr2:236160751-236160770	236160767	4	4	sense	NAG	ACTTATCAGAGACTGGAAAG	5	RNA2	AD49ZG	RGEN-seq
chr2:239685114-239685133	239685130	84	83	sense	NGG	TCTAATGAGAGACAGAAAAG	5	RNA2	AD49ZG	RGEN-seq
chr2:240857681-240857700	240857683	39	39	antisense	NGG	TTTGGAGAAAGACAGGAATG	5	RNA2	AD49ZG	RGEN-seq
chr2:240883673-240883692	240883689	60	60	sense	NGG	TCTGCTGAAAGACCTTAAAG	3	RNA2	AD49ZG	RGEN-seq
chr2:245626264-245626283	245626280	129	126	sense	NGG	CTTGCTGATAGACTGGATAT	5	RNA2	AD49ZG	RGEN-seq
chr2:247657357-247657376	247657373	408	407	sense	NAG	ACTTCAGAAATACTGGAAAG	4	RNA2	AD49ZG	RGEN-seq
chr2:248067318-248067337	248067334	17	17	sense	NAG	TCTGCTACAGGACTGGAGAG	4	RNA2	AD49ZG	RGEN-seq
chr2:248700262-248700281	248700264	5	5	antisense	NGG	ACAGGTGTAAGACTGGAGAG	5	RNA2	AD49ZG	RGEN-seq
chr2:248939094-248939113	248939096	88	88	antisense	NGG	TCTGCTAAAGGCCTGGAATG	4	RNA2	AD49ZG	RGEN-seq
chr2:250423822-250423841	250423838	65	65	sense	NGG	TCTAATGAGAGACAGAAAAG	5	RNA2	AD49ZG	RGEN-seq
chr2:250640397-250640416	250640399	7	5	antisense	NGG	TCTTCAAAAAGAGAGGAAAG	5	RNA2	AD49ZG	RGEN-seq
chr2:250851812-250851831	250851828	225	225	sense	NGG	TCTACAGAGAGACAGAAAAG	5	RNA2	AD49ZG	RGEN-seq
chr2:251353603-251353622	251353619	4	4	sense	NAG	TGAGATGAAAAACTGGGAAG	5	RNA2	AD49ZG	RGEN-seq
chr2:251493301-251493320	251493303	52	52	antisense	NGG	CCTGCAGAAAGATTAGGAAG	5	RNA2	AD49ZG	RGEN-seq
chr2:252525029-252525048	252525031	3	3	antisense	NAG	TCTAGTGTAAGACTGGAAGA	5	RNA2	AD49ZG	RGEN-seq
chr2:252526605-252526624	252526621	507	505	sense	NGG	CTTACTGAAAAACTGAAAAG	5	RNA2	AD49ZG	RGEN-seq
chr2:257212865-257212884	257212867	179	179	antisense	NGG	ACTTGTGAAAAACTGGAAAC	5	RNA2	AD49ZG	RGEN-seq
chr2:260033742-260033761	260033758	465	459	sense	NAG	GCTGATGTAAGACTGGAGAG	4	RNA2	AD49ZG	RGEN-seq
chr2:261395213-261395232	261395215	485	378	antisense	NGG	TTAGCTGAAACACTGGTTAG	5	RNA2	AD49ZG	RGEN-seq
chr2:263539069-263539088	263539085	3	3	sense	NGG	TCTGCTGAGATACACGGAAG	5	RNA2	AD49ZG	RGEN-seq
chr2:263767537-263767556	263767539	410	410	antisense	NGG	AGAGCTGAAAGACTGCAAAA	5	RNA2	AD49ZG	RGEN-seq
chr2:268162652-268162671	268162668	3	3	sense	NAG	TCTAATGATAGACAGAAAAG	5	RNA2	AD49ZG	RGEN-seq
chr2:269878523-269878542	269878525	213	211	antisense	NAG	TATCTAGAAAGACTAGAAAG	5	RNA2	AD49ZG	RGEN-seq
chr2:270407530-270407549	270407532	5	5	antisense	NGG	TCTCTGGAACAACTGGAAAG	5	RNA2	AD49ZG	RGEN-seq
chr2:272097877-272097896	272097893	3	3	sense	NAG	TTTGCAAAAAGACTGAAAAC	5	RNA2	AD49ZG	RGEN-seq
chr2:276251071-276251090	276251073	82	82	antisense	NAG	CCAACTGAATGACTGGAAAT	5	RNA2	AD49ZG	RGEN-seq
chr2:276648841-276648860	276648843	10	10	antisense	NAG	TATACTAAAAGACTGGTATG	5	RNA2	AD49ZG	RGEN-seq
chr2:277686478-277686497	277686480	74	73	antisense	NGG	TCAGCAGAAAAACTTTAAAG	5	RNA2	AD49ZG	RGEN-seq
chr2:279716224-279716243	279716226	4	4	antisense	NGG	TCTGCAGAAGGAGTAGAAAG	4	RNA2	AD49ZG	RGEN-seq
chr2:281394012-281394031	281394014	9	9	antisense	NAG	AATGCTGAGAGATTGGAGAG	5	RNA2	AD49ZG	RGEN-seq
chr2:283553793-283553812	283553795	94	94	antisense	NGG	TTAGATGTAATACTGGAAAG	5	RNA2	AD49ZG	RGEN-seq
chr2:285487207-285487226	285487209	102	99	antisense	NGG	TCATCTTAAAGACTGAAAGG	5	RNA2	AD49ZG	RGEN-seq
chr2:288025825-288025844	288025827	224	224	antisense	NGG	TATGCTTAAAGACTAGGAAT	5	RNA2	AD49ZG	RGEN-seq
chr2:288982299-288982318	288982315	271	268	sense	NGG	TCATGTGAAAGAATGGAAAG	4	RNA2	AD49ZG	RGEN-seq
chr2:289401145-289401164	289401147	90	89	antisense	NGG	TCTGCCCCAAGACTGGGAAG	4	RNA2	AD49ZG	RGEN-seq
chr2:289677483-289677502	289677485	4	4	antisense	NGG	TCAGCTGATAGACAGGGATG	5	RNA2	AD49ZG	RGEN-seq
chr2:290245166-290245185	290245182	320	320	sense	NGG	ACATTTGAAAGACTAGAAAG	5	RNA2	AD49ZG	RGEN-seq
chr2:290438583-290438602	290438599	7	7	sense	NGG	TCTAGTGACAGACTGGATAT	5	RNA2	AD49ZG	RGEN-seq
chr2:291611494-291611513	291611496	3	3	antisense	NAG	TCTGCTGCTGGAATGGAAAG	4	RNA2	AD49ZG	RGEN-seq
chr2:292238314-292238333	292238316	17	13	antisense	NAG	TCTGCAGACAGACTGGATTA	5	RNA2	AD49ZG	RGEN-seq
chr2:293335689-293335708	293335691	33	33	antisense	NGG	TCTACTGCAAAGCTGGAGAG	5	RNA2	AD49ZG	RGEN-seq
chr2:293916355-293916374	293916357	9	9	antisense	NGG	ACTGCTGGAAGACAGGAGAA	5	RNA2	AD49ZG	RGEN-seq
chr2:294226308-294226327	294226324	4	4	sense	NAG	TCTGCTACAAGAATGGAAAA	4	RNA2	AD49ZG	RGEN-seq
chr2:294505928-294505947	294505944	71	70	sense	NAG	ACTATTGAAAAACTTGAAAG	5	RNA2	AD49ZG	RGEN-seq
chr2:295260839-295260858	295260855	10	10	sense	NAG	GCAGCTGACTGACTAGAAAG	5	RNA2	AD49ZG	RGEN-seq
chr2:295693281-295693300	295693297	11	11	sense	NGG	TCTGAGGAAGGACTGGAGAA	5	RNA2	AD49ZG	RGEN-seq
chr2:296823213-296823232	296823215	4	4	antisense	NGG	TGGGCTGGAAGACTGGCAAC	5	RNA2	AD49ZG	RGEN-seq
chr2:299226032-299226051	299226048	27	27	sense	NAG	TATGCAGAAATACTGGATAG	4	RNA2	AD49ZG	RGEN-seq
chr2:299395353-299395372	299395369	42	39	sense	NAG	TGTGCAGAAAGACTGAAATA	5	RNA2	AD49ZG	RGEN-seq
chr2:299451767-299451786	299451783	13	13	sense	NGG	TTTGATCAAATACTGAAAAG	5	RNA2	AD49ZG	RGEN-seq
chr2:301130987-301131006	301131003	4	4	sense	NAG	TCGCAAGAAAGAATGGAAAG	5	RNA2	AD49ZG	RGEN-seq
chr2:301309126-301309145	301309128	61	60	antisense	NGG	CCAGCTGAAGGACTGGAGGG	5	RNA2	AD49ZG	RGEN-seq
chr2:301784463-301784482	301784465	67	67	antisense	NAG	AGAGCTGGAAGACTGGCAAG	5	RNA2	AD49ZG	RGEN-seq
chr2:304717991-304718010	304717993	52	52	antisense	NGG	TCTGTTGGGAAACTGGAAAC	5	RNA2	AD49ZG	RGEN-seq
chr2:308059455-308059474	308059457	226	224	antisense	NGG	ACTGCTGAAAACCTGGAAAG	3	RNA2	AD49ZG	RGEN-seq
chr2:308169402-308169421	308169418	88	88	sense	NGG	TCTCATGACAGATTGGAAAG	4	RNA2	AD49ZG	RGEN-seq
chr2:311145617-311145636	311145633	182	180	sense	NGG	TCTGCAAGCAGACTGGAGAG	5	RNA2	AD49ZG	RGEN-seq
chr2:312576362-312576381	312576364	43	43	antisense	NAG	TGTGCTGCAAGGCTGAAAAG	4	RNA2	AD49ZG	RGEN-seq
chr2:314395089-314395108	314395105	114	113	sense	NAG	ACTGATGATAAATTGGAAAG	5	RNA2	AD49ZG	RGEN-seq
chr2:315761640-315761659	315761656	4	4	sense	NGG	TCTGCTAGAACACTGGATGG	5	RNA2	AD49ZG	RGEN-seq
chr2:315956603-315956622	315956619	3	3	sense	NAG	TCAGCTAAAACAAAGGAAAG	5	RNA2	AD49ZG	RGEN-seq
chr2:320917267-320917286	320917269	234	233	antisense	NGG	ATTGATGGAAGACTGGAAAT	5	RNA2	AD49ZG	RGEN-seq
chr2:322498385-322498404	322498387	6	6	antisense	NGG	TTTGCAGAAAGATTGTCAAG	5	RNA2	AD49ZG	RGEN-seq
chr2:327748518-327748537	327748534	12	12	sense	NAG	TCTGGTAAAAGACTGAAATG	4	RNA2	AD49ZG	RGEN-seq
chr2:329581798-329581817	329581800	6	6	antisense	NGG	TCTGATGATGGACTGGAACC	5	RNA2	AD49ZG	RGEN-seq
chr2:331870369-331870388	331870371	102	99	antisense	NAG	TGTGCTGAAAGCCTGGAAAT	3	RNA2	AD49ZG	RGEN-seq
chr2:333266146-333266165	333266148	327	322	antisense	NAG	TCTGCTGACAAACTGGAAAT	3	RNA2	AD49ZG	RGEN-seq
chr2:334803269-334803288	334803271	261	71	antisense	NGG	GCAGCTGACAGACTGGGAAA	5	RNA2	AD49ZG	RGEN-seq
chr2:334828466-334828485	334828468	189	187	antisense	NGG	TCCACTAAAAGCCTGGAAAT	5	RNA2	AD49ZG	RGEN-seq
chr2:343186212-343186231	343186214	5	5	antisense	NGG	TCTGCTTAATGACTATAATG	5	RNA2	AD49ZG	RGEN-seq
chr2:343807099-343807118	343807115	4	4	sense	NAG	TCTGCAGCAAGAATGAAAAG	4	RNA2	AD49ZG	RGEN-seq
chr2:346396992-346397011	346396994	264	259	antisense	NGG	AATTCTGAAAGACTGGATTG	5	RNA2	AD49ZG	RGEN-seq
chr2:347081547-347081566	347081549	127	126	antisense	NGG	TATTCTGAAAGACAGGACTG	5	RNA2	AD49ZG	RGEN-seq
chr2:348872430-348872449	348872446	234	232	sense	NGG	GCACCAGAAACACTGGAAAG	5	RNA2	AD49ZG	RGEN-seq
chr2:348890734-348890753	348890750	68	67	sense	NGG	TGCTCTGAAAGACAGGAGAG	5	RNA2	AD49ZG	RGEN-seq
chr2:349234060-349234079	349234076	3	3	sense	NAG	TCTGCTAATCCACTGGGAAG	5	RNA2	AD49ZG	RGEN-seq
chr2:350009438-350009457	350009454	5	5	sense	NGG	TGTGAACAAGGACTGGAAAG	5	RNA2	AD49ZG	RGEN-seq
chr2:351449376-351449395	351449392	243	243	sense	NAG	TGTGCTGTAAGACTAGAAAG	3	RNA2	AD49ZG	RGEN-seq
chr2:352331219-352331238	352331235	246	245	sense	NGG	TCTGACTAAAGACTGGAAGA	5	RNA2	AD49ZG	RGEN-seq
chr2:357632718-357632737	357632720	15	12	antisense	NGG	TCTGCTGGAACACTGGATGG	4	RNA2	AD49ZG	RGEN-seq
chr2:359621823-359621842	359621825	24	24	antisense	NGG	GCTGAAGAATGACTGGACAG	5	RNA2	AD49ZG	RGEN-seq
chr2:361724240-361724259	361724256	35	35	sense	NAG	TCTTTGTAAAGACTGAAAAG	5	RNA2	AD49ZG	RGEN-seq
chr2:362495135-362495154	362495137	364	359	antisense	NGG	GGGGGTGAAAGATTGGAAAG	5	RNA2	AD49ZG	RGEN-seq
chr2:365254976-365254995	365254978	4	4	antisense	NAG	ACTGTTGAAAGATCAGAAAG	5	RNA2	AD49ZG	RGEN-seq
chr2:366588286-366588305	366588288	5	5	antisense	NGG	GCTGGTGAAAGGCTGGATGG	5	RNA2	AD49ZG	RGEN-seq
chr2:367304359-367304378	367304361	6	6	antisense	NGG	CCTTCAGCAAGTCTGGAAAG	5	RNA2	AD49ZG	RGEN-seq
chr2:368582077-368582096	368582093	10	10	sense	NGG	GCTGCTCACAGACTGGGAAA	5	RNA2	AD49ZG	RGEN-seq
chr2:368590875-368590894	368590891	10	10	sense	NGG	TCTGTGGAAGGACTGGATAA	5	RNA2	AD49ZG	RGEN-seq
chr2:371124486-371124505	371124502	25	25	sense	NGG	TGGGCTGATAGACTGGTAGG	5	RNA2	AD49ZG	RGEN-seq
chr2:371336623-371336642	371336625	93	90	antisense	NGG	TTAGCTGAAAGATGGAAAAG	5	RNA2	AD49ZG	RGEN-seq
chr2:375262557-375262576	375262559	10	9	antisense	NAG	TCTACTCAAAAACTGGGAAA	5	RNA2	AD49ZG	RGEN-seq
chr2:375579792-375579811	375579808	8	8	sense	NGG	TGGGCGGAAGGACTGGAAAT	5	RNA2	AD49ZG	RGEN-seq
chr2:376343649-376343668	376343651	68	68	antisense	NGG	TCTGGACAAAGACTGGAGAA	5	RNA2	AD49ZG	RGEN-seq
chr2:376677322-376677341	376677324	22	22	antisense	NAG	TTAGCAGACACACTGGAAAG	5	RNA2	AD49ZG	RGEN-seq
chr2:377644995-377645014	377644997	215	213	antisense	NGG	ACTACTGGGAGACTGGGAAG	5	RNA2	AD49ZG	RGEN-seq
chr2:379238167-379238186	379238183	11	11	sense	NGG	GCTCTTGAAGGACTGAAAAG	5	RNA2	AD49ZG	RGEN-seq
chr2:383099135-383099154	383099137	18	18	antisense	NGG	TCCTGTGAAAGCCTGGGAAG	5	RNA2	AD49ZG	RGEN-seq
chr2:384357182-384357201	384357184	6	6	antisense	NAG	TTTACAGAGAGACTGGAAAA	5	RNA2	AD49ZG	RGEN-seq
chr2:384768451-384768470	384768453	14	10	antisense	NAG	ACTGAGGAAACACCGGAAAG	5	RNA2	AD49ZG	RGEN-seq
chr2:389855885-389855904	389855901	8	7	sense	NAG	TCTGATAACAAATTGGAAAG	5	RNA2	AD49ZG	RGEN-seq
chr2:391132039-391132058	391132055	30	30	sense	NGG	TCTGCAGTAAGACCAAAAAG	5	RNA2	AD49ZG	RGEN-seq
chr2:391924104-391924123	391924106	41	41	antisense	NGG	ACAGCTGGGAGACTGGGAAG	5	RNA2	AD49ZG	RGEN-seq
chr2:392098249-392098268	392098265	4	4	sense	NAG	TAAGAGGAAGGACTGGAAAG	5	RNA2	AD49ZG	RGEN-seq
chr2:397269668-397269687	397269670	224	221	antisense	NGG	TCTGACAAAAGACTAGAAAC	5	RNA2	AD49ZG	RGEN-seq
chr2:398866864-398866883	398866866	227	226	antisense	NAG	TTCTGTGATAGACTGGAAAG	5	RNA2	AD49ZG	RGEN-seq
chr2:401734467-401734486	401734483	158	158	sense	NAG	GCAGGTAAAAGACTGGAAAT	5	RNA2	AD49ZG	RGEN-seq
chr2:403502455-403502474	403502457	439	437	antisense	NGG	TGGGTTGAAAAACTAGAAAG	5	RNA2	AD49ZG	RGEN-seq
chr2:405234974-405234993	405234976	169	168	antisense	NGG	CCAGTTGAAAGACTGGAGGG	5	RNA2	AD49ZG	RGEN-seq
chr2:405470671-405470690	405470673	559	555	antisense	NGG	GGTGCTGAAAGAGAGGAAAG	4	RNA2	AD49ZG	RGEN-seq
chr2:406047487-406047506	406047503	478	468	sense	NGG	GGTGAGGAAAGACTGGAATG	5	RNA2	AD49ZG	RGEN-seq
chr2:406199215-406199234	406199231	3	3	sense	NGG	TGAGTGGAAGGACTGGAAAG	5	RNA2	AD49ZG	RGEN-seq
chr2:410175683-410175702	410175699	4	4	sense	NGG	TCTGCTGAATTCCTGGGAAG	4	RNA2	AD49ZG	RGEN-seq
chr2:410580409-410580428	410580425	197	197	sense	NGG	TGAGCCAAAAGTCTGGAAAG	5	RNA2	AD49ZG	RGEN-seq
chr2:411019669-411019688	411019671	4	4	antisense	NAG	CCAGTTGGAACACTGGAAAG	5	RNA2	AD49ZG	RGEN-seq
chr2:413656630-413656649	413656632	24	24	antisense	NGG	TCTAATGAAAGACAGAAAGG	5	RNA2	AD49ZG	RGEN-seq
chr2:417349483-417349502	417349485	271	269	antisense	NAG	ATTGCAGAAAGATTGGAAAG	4	RNA2	AD49ZG	RGEN-seq
chr2:418491313-418491332	418491329	37	36	sense	NAG	ACAGAAGTAAGACTGGAAAG	5	RNA2	AD49ZG	RGEN-seq
chr2:419446991-419447010	419446993	18	17	antisense	NGG	TCTTCTCAAAGACTATAAAG	4	RNA2	AD49ZG	RGEN-seq
chr2:419811620-419811639	419811636	15	15	sense	NGG	TGTACTCTAAGACTGGAAAA	5	RNA2	AD49ZG	RGEN-seq
chr2:421243972-421243991	421243974	13	13	antisense	NAG	AATGCTGAGAGATTGGAGAG	5	RNA2	AD49ZG	RGEN-seq
chr2:422556231-422556250	422556247	11	10	sense	NGG	TCTGTTGACGAACTGGAAAC	5	RNA2	AD49ZG	RGEN-seq
chr2:422795410-422795429	422795412	20	19	antisense	NAG	CCTGCTGAAAGGCTGAAAAA	4	RNA2	AD49ZG	RGEN-seq
chr2:423304396-423304415	423304398	260	260	antisense	NAG	TGAGCTGAAAAACTGGACAG	4	RNA2	AD49ZG	RGEN-seq
chr2:423345995-423346014	423346011	546	544	sense	NAG	TCTGAAGAATGACTGAAAAG	4	RNA2	AD49ZG	RGEN-seq
chr2:424788866-424788885	424788882	67	67	sense	NAG	TCAGCTAAATGACTGGAAAT	4	RNA2	AD49ZG	RGEN-seq
chr2:426113053-426113072	426113069	14	14	sense	NGG	TCAGCTGTAGAACTGGGAAG	5	RNA2	AD49ZG	RGEN-seq
chr2:429453219-429453238	429453235	316	314	sense	NGG	TCTGCAGTATAACTGGAAAT	5	RNA2	AD49ZG	RGEN-seq
chr2:430755147-430755166	430755163	16	16	sense	NAG	TCTGCTGCAAGACTGGCAAA	3	RNA2	AD49ZG	RGEN-seq
chr2:433550774-433550793	433550776	242	242	antisense	NAG	ACTGGTAAAAGATTGGAAAG	4	RNA2	AD49ZG	RGEN-seq
chr2:436344616-436344635	436344632	172	171	sense	NAG	TGTACAGAAAGCCTGGAAAG	4	RNA2	AD49ZG	RGEN-seq
chr2:436420785-436420804	436420787	116	114	antisense	NGG	TTTGTTGAAAGAATGAAAAA	5	RNA2	AD49ZG	RGEN-seq
chr2:437459857-437459876	437459859	19	19	antisense	NGG	TCTGCTTTAAGACTGAAATT	5	RNA2	AD49ZG	RGEN-seq
chr2:437952101-437952120	437952117	5	5	sense	NAG	GTTCCTTAAACACTGGAAAG	5	RNA2	AD49ZG	RGEN-seq
chr2:440548596-440548615	440548612	32	31	sense	NGG	TGAGCTGACATACTGGAAAA	5	RNA2	AD49ZG	RGEN-seq
chr2:443084717-443084736	443084733	207	204	sense	NGG	GAAGCTGAGAGACTGGTAAG	5	RNA2	AD49ZG	RGEN-seq
chr2:444655299-444655318	444655301	30	30	antisense	NGG	GCTGCTCCAAGACTGCAAAG	4	RNA2	AD49ZG	RGEN-seq
chr2:448689110-448689129	448689126	305	302	sense	NAG	CATGCTAAAACACTGGAAAG	4	RNA2	AD49ZG	RGEN-seq
chr2:448946193-448946212	448946209	3	3	sense	NGG	TTTTCTGAAAGTTTGAAAAG	5	RNA2	AD49ZG	RGEN-seq
chr2:450793240-450793259	450793242	17	16	antisense	NAG	TCTGCTTTTATACTAGAAAG	5	RNA2	AD49ZG	RGEN-seq
chr2:452404226-452404245	452404228	60	59	antisense	NAG	ACTGGTGAATGACTGGAAAA	4	RNA2	AD49ZG	RGEN-seq
chr2:452783186-452783205	452783202	3	3	sense	NGG	TATGCTGAAAGTCTGGATCC	5	RNA2	AD49ZG	RGEN-seq
chr2:455851043-455851062	455851059	300	299	sense	NAG	GATGCTGAAAGTATGGAAAG	4	RNA2	AD49ZG	RGEN-seq
chr2:455884433-455884452	455884449	11	11	sense	NGG	TGTGCAGAGAGACTGGGCAG	5	RNA2	AD49ZG	RGEN-seq
chr2:456344828-456344847	456344844	45	40	sense	NAG	CCTGCTGGAAGCATGGAAAG	4	RNA2	AD49ZG	RGEN-seq
chr2:456429118-456429137	456429134	207	205	sense	NGG	GCAGCTAAAAGGCTGGAATG	5	RNA2	AD49ZG	RGEN-seq
chr2:458718470-458718489	458718486	14	8	sense	NAG	CCTGTTGAAAAAAAGGAAAG	5	RNA2	AD49ZG	RGEN-seq
chr2:460212091-460212110	460212093	234	234	antisense	NGG	TTGTCTGAAAGACTAGGAAG	5	RNA2	AD49ZG	RGEN-seq
chr2:460286032-460286051	460286034	23	19	antisense	NGG	TCTGTTGAAAGACAGAAAGG	4	RNA2	AD49ZG	RGEN-seq
chr2:460350009-460350028	460350025	84	84	sense	NAG	TCATCTGAAGAACTGGAAAG	4	RNA2	AD49ZG	RGEN-seq
chr2:461202889-461202908	461202891	200	200	antisense	NGG	TGAGCTGAAAGGCTGGAGAG	4	RNA2	AD49ZG	RGEN-seq
chr2:461813873-461813892	461813889	3	3	sense	NGG	ACTACTGAAAGGGTGTAAAG	5	RNA2	AD49ZG	RGEN-seq
chr2:462534056-462534075	462534072	26	25	sense	NGG	TCTGCTGTGTAACAGGAAAG	5	RNA2	AD49ZG	RGEN-seq
chr3:833215-833234	833217	173	172	antisense	NAG	TGAAGTGAAACACTGGAAAG	5	RNA2	AD49ZG	RGEN-seq
chr3:2449379-2449398	2449381	8	8	antisense	NAG	CCTGCTGTAAGATTTGAAAG	4	RNA2	AD49ZG	RGEN-seq
chr3:3867427-3867446	3867429	4	4	antisense	NAG	TCCACTGAAAACCTGGTAAG	5	RNA2	AD49ZG	RGEN-seq
chr3:4241971-4241990	4241973	3	3	antisense	NAG	GCAGCTCAGAGCCTGGAAAG	5	RNA2	AD49ZG	RGEN-seq
chr3:4713125-4713144	4713127	7	7	antisense	NGG	TCTGCTGCAAGCCAGGAATG	4	RNA2	AD49ZG	RGEN-seq
chr3:4813658-4813677	4813674	73	72	sense	NGG	CCTGATGAAAGACAGAAAGG	5	RNA2	AD49ZG	RGEN-seq
chr3:4828283-4828302	4828285	414	411	antisense	NAG	TCAACTTAAAAACTGGAAAG	4	RNA2	AD49ZG	RGEN-seq
chr3:5512417-5512436	5512419	8	8	antisense	NAG	TGGACAGAAAGACGGGAAAG	5	RNA2	AD49ZG	RGEN-seq
chr3:6685368-6685387	6685370	5	5	antisense	NAG	TCTCCAAATAAACTGGAAAG	5	RNA2	AD49ZG	RGEN-seq
chr3:6894683-6894702	6894685	82	81	antisense	NGG	CATGCTGAGAGACTGGAGGG	5	RNA2	AD49ZG	RGEN-seq
chr3:7103000-7103019	7103016	298	292	sense	NGG	TCTGCACTAAAACTGGAAAA	5	RNA2	AD49ZG	RGEN-seq
chr3:8445138-8445157	8445154	12	12	sense	NAG	TAGGCTGTAACACTGGAAAA	5	RNA2	AD49ZG	RGEN-seq
chr3:10093568-10093587	10093584	84	84	sense	NGG	TCAGCAGAGAAACTGGCAAG	5	RNA2	AD49ZG	RGEN-seq
chr3:13711305-13711324	13711321	15	15	sense	NGG	TCTGCTGGCAGACTGATAAT	5	RNA2	AD49ZG	RGEN-seq
chr3:14316158-14316177	14316160	418	415	antisense	NGG	AATACAAAAAGACTGGAAAG	5	RNA2	AD49ZG	RGEN-seq
chr3:15801596-15801615	15801612	340	340	sense	NGG	CATGCTGAAACACTGTTAAG	5	RNA2	AD49ZG	RGEN-seq
chr3:16495542-16495561	16495544	416	415	antisense	NGG	TCTACTTTAAAACTAGAAAG	5	RNA2	AD49ZG	RGEN-seq
chr3:17148162-17148181	17148178	15	15	sense	NGG	TCTACAGAAAGAGTAGAAAA	5	RNA2	AD49ZG	RGEN-seq
chr3:17275660-17275679	17275676	549	543	sense	NGG	AATAGTGAAAGACTGGAATG	5	RNA2	AD49ZG	RGEN-seq
chr3:18002309-18002328	18002311	103	101	antisense	NGG	CCGGCTGAAAGACTGGTTCG	5	RNA2	AD49ZG	RGEN-seq
chr3:20570613-20570632	20570629	210	207	sense	NAG	ACTTTTGAAAGACTGGAAAG	3	RNA2	AD49ZG	RGEN-seq
chr3:20619751-20619770	20619767	456	456	sense	NGG	CTTGCTGTAAGACTGAAAAT	5	RNA2	AD49ZG	RGEN-seq
chr3:20702316-20702335	20702332	139	139	sense	NAG	AGTACTGCAAAACTGGAAAG	5	RNA2	AD49ZG	RGEN-seq
chr3:21685518-21685537	21685534	6	6	sense	NGG	TCAGCTCCAAGACTGGCATG	5	RNA2	AD49ZG	RGEN-seq
chr3:25133766-25133785	25133768	49	48	antisense	NAG	TCTGCCAAAAGACTGAAGAG	4	RNA2	AD49ZG	RGEN-seq
chr3:25269545-25269564	25269547	74	74	antisense	NAG	TCTACTGAGAGACAGAAAAG	4	RNA2	AD49ZG	RGEN-seq
chr3:26572439-26572458	26572455	181	179	sense	NGG	ACTGCAGATAAAATGGAAAG	5	RNA2	AD49ZG	RGEN-seq
chr3:28924164-28924183	28924166	3	3	antisense	NGG	TCTGGTGAAAATATGGAAAA	5	RNA2	AD49ZG	RGEN-seq
chr3:30927933-30927952	30927949	139	139	sense	NGG	TCTGATTGAAGACTTAAAAG	5	RNA2	AD49ZG	RGEN-seq
chr3:32126594-32126613	32126596	3	3	antisense	NGG	TCCGAGGGAAGACAGGAAAG	5	RNA2	AD49ZG	RGEN-seq
chr3:34047067-34047086	34047069	276	274	antisense	NGG	TCTGGGGAAAGACTGGAGAA	4	RNA2	AD49ZG	RGEN-seq
chr3:34574262-34574281	34574278	267	264	sense	NGG	GGGGCTGAAAGACTGGAATC	5	RNA2	AD49ZG	RGEN-seq
chr3:34925021-34925040	34925037	5	4	sense	NAG	TCTGAGAAGTGACTGGAAAG	5	RNA2	AD49ZG	RGEN-seq
chr3:37348260-37348279	37348262	11	11	antisense	NGG	TTTGGTGAATTACTGAAAAG	5	RNA2	AD49ZG	RGEN-seq
chr3:37705353-37705372	37705355	12	12	antisense	NAG	TTTGAAGAAAGGCTGGAAAT	5	RNA2	AD49ZG	RGEN-seq
chr3:37911218-37911237	37911234	549	546	sense	NGG	TCTACTGAAAAACAGGAAAT	4	RNA2	AD49ZG	RGEN-seq
chr3:39821557-39821576	39821559	343	339	antisense	NAG	ACTTCTAAAACACTGGAAAG	4	RNA2	AD49ZG	RGEN-seq
chr3:40604714-40604733	40604716	59	59	antisense	NAG	TCAGCTGAGAAACTGGAAGG	4	RNA2	AD49ZG	RGEN-seq
chr3:41428532-41428551	41428548	4	4	sense	NGG	TTTGCAGAAAGACTGTAGAC	5	RNA2	AD49ZG	RGEN-seq
chr3:42847585-42847604	42847601	54	48	sense	NAG	TTGACTGAAAGACTGGACAA	5	RNA2	AD49ZG	RGEN-seq
chr3:43022341-43022360	43022357	135	134	sense	NGG	TCGGCTGAGACACTGGACAG	4	RNA2	AD49ZG	RGEN-seq
chr3:44510291-44510310	44510307	171	168	sense	NGG	GCTGATAAAACACTGGAATG	5	RNA2	AD49ZG	RGEN-seq
chr3:44658278-44658297	44658294	4	4	sense	NGG	GCTCCTGATAGGCTGGAAGG	5	RNA2	AD49ZG	RGEN-seq
chr3:45368004-45368023	45368006	29	28	antisense	NAG	TCTACTGAGAGACTGAAACA	5	RNA2	AD49ZG	RGEN-seq
chr3:46405096-46405115	46405112	40	40	sense	NAG	GCAGCAGAAAGAATGGAATG	5	RNA2	AD49ZG	RGEN-seq
chr3:46672200-46672219	46672202	16	16	antisense	NGG	TCTTCTGTAAGACTTGACAG	4	RNA2	AD49ZG	RGEN-seq
chr3:47153968-47153987	47153970	5	5	antisense	NAG	TCTGATAGAAGAATGGATAG	5	RNA2	AD49ZG	RGEN-seq
chr3:47776864-47776883	47776880	19	18	sense	NAG	ACTATTGCAAGACTGAAAAG	5	RNA2	AD49ZG	RGEN-seq
chr3:48972364-48972383	48972366	190	190	antisense	NGG	ACTGCTTAATGAATGAAAAG	5	RNA2	AD49ZG	RGEN-seq
chr3:50134209-50134228	50134211	661	657	antisense	NGG	CTTGCTAAAAGACTGAACAG	5	RNA2	AD49ZG	RGEN-seq
chr3:51418719-51418738	51418721	79	79	antisense	NGG	TCTGCAGGGAAACTGGAAAC	5	RNA2	AD49ZG	RGEN-seq
chr3:53469406-53469425	53469422	387	381	sense	NAG	GATGCTGAAAAACTGGAAAA	4	RNA2	AD49ZG	RGEN-seq
chr3:54138493-54138512	54138509	124	124	sense	NGG	CATCCTGAAAGACTTGAAGG	5	RNA2	AD49ZG	RGEN-seq
chr3:57250209-57250228	57250225	46	45	sense	NAG	CCTCGTGGAAGACTGGAAAG	4	RNA2	AD49ZG	RGEN-seq
chr3:57950498-57950517	57950514	48	48	sense	NGG	TTTGCAAAAAGACTCAAAAG	5	RNA2	AD49ZG	RGEN-seq
chr3:59386828-59386847	59386844	10	10	sense	NGG	ATTGCAGAAGGAGTGGAAAG	5	RNA2	AD49ZG	RGEN-seq
chr3:59488285-59488304	59488287	88	88	antisense	NGG	GCTGTTGAAAGAATTGAAAG	4	RNA2	AD49ZG	RGEN-seq
chr3:62638398-62638417	62638400	5	5	antisense	NGG	TCTGGGGAAGGACTGGAGAA	5	RNA2	AD49ZG	RGEN-seq
chr3:63241311-63241330	63241313	365	358	antisense	NGG	TACACTGAAAGACTGGAAAT	4	RNA2	AD49ZG	RGEN-seq
chr3:64634626-64634645	64634642	597	594	sense	NAG	ATGGCTGAAAAACTGGAAAA	5	RNA2	AD49ZG	RGEN-seq
chr3:65333280-65333299	65333296	24	20	sense	NAG	ACAGCTGGAAGACAGAAAAG	5	RNA2	AD49ZG	RGEN-seq
chr3:65549573-65549592	65549575	520	517	antisense	NGG	TTTGCCTAAAGATTAGAAAG	5	RNA2	AD49ZG	RGEN-seq
chr3:65900828-65900847	65900844	238	234	sense	NGG	ACTGCAGGAAGAATAGAAAG	5	RNA2	AD49ZG	RGEN-seq
chr3:66658061-66658080	66658077	13	12	sense	NGG	CCTGGTGAGCGACTGGAAAG	4	RNA2	AD49ZG	RGEN-seq
chr3:66864471-66864490	66864473	416	415	antisense	NGG	TCTGCCAAAAGACTGCAAAG	3	RNA2	AD49ZG	RGEN-seq
chr3:68158694-68158713	68158696	3	3	antisense	NAG	TCTAATGAGAGACAGAAAAG	5	RNA2	AD49ZG	RGEN-seq
chr3:69176842-69176861	69176858	7	7	sense	NGG	TTTGGTGAGATACTGGAATG	5	RNA2	AD49ZG	RGEN-seq
chr3:70145165-70145184	70145181	3	3	sense	NGG	TGTGGAGTAAGCCTGGAAAG	5	RNA2	AD49ZG	RGEN-seq
chr3:72155564-72155583	72155580	5	5	sense	NAG	TCTAATGAGAGACAGAAAAG	5	RNA2	AD49ZG	RGEN-seq
chr3:72477003-72477022	72477005	9	9	antisense	NGG	TCTACTGAACATCTGGAATG	5	RNA2	AD49ZG	RGEN-seq
chr3:74290651-74290670	74290653	75	75	antisense	NGG	TCTGCATGAGGACTGGAAAG	4	RNA2	AD49ZG	RGEN-seq
chr3:76388622-76388641	76388638	389	388	sense	NGG	GGTGGAGAAAGACTGGCAAG	5	RNA2	AD49ZG	RGEN-seq
chr3:77197732-77197751	77197748	521	516	sense	NGG	ACAGATGAAAGACTGGGAAG	4	RNA2	AD49ZG	RGEN-seq
chr3:78201683-78201702	78201685	12	12	antisense	NAG	TGGGCTGGAAGACTAGAAAT	5	RNA2	AD49ZG	RGEN-seq
chr3:79032495-79032514	79032511	17	16	sense	NGG	ACCGCTGAAAGGTTTGAAAG	5	RNA2	AD49ZG	RGEN-seq
chr3:79671641-79671660	79671657	39	39	sense	NGG	TCTGGAAAAATACTGGAAAT	5	RNA2	AD49ZG	RGEN-seq
chr3:79757744-79757763	79757746	12	12	antisense	NGG	TCTGCTAAAAGTATGGAAGA	5	RNA2	AD49ZG	RGEN-seq
chr3:80404724-80404743	80404740	6	6	sense	NGG	TCAGCTCATGGATTGGAAAG	5	RNA2	AD49ZG	RGEN-seq
chr3:80413018-80413037	80413020	421	417	antisense	NGG	TAAGCAAAAAGAATGGAAAG	5	RNA2	AD49ZG	RGEN-seq
chr3:80445977-80445996	80445979	5	5	antisense	NAG	AATGCTGAAATGCTGAAAAG	5	RNA2	AD49ZG	RGEN-seq
chr3:81208123-81208142	81208139	57	57	sense	NGG	GATGCAGGAAGAGTGGAAAG	5	RNA2	AD49ZG	RGEN-seq
chr3:83730797-83730816	83730799	23	23	antisense	NGG	CCACTTGATAGACTGGAAAG	5	RNA2	AD49ZG	RGEN-seq
chr3:84360112-84360131	84360128	5	5	sense	NGG	TCTGAGGGAAGACAGGGAAG	5	RNA2	AD49ZG	RGEN-seq
chr3:84696762-84696781	84696764	332	331	antisense	NGG	TCTGATAAAACACTGAAATG	5	RNA2	AD49ZG	RGEN-seq
chr3:84990143-84990162	84990159	551	548	sense	NAG	TCCTTTGAAAGACAGGAAAG	4	RNA2	AD49ZG	RGEN-seq
chr3:85000787-85000806	85000803	99	96	sense	NGG	GCTGAGGGAAGACTGGAATG	5	RNA2	AD49ZG	RGEN-seq
chr3:85876848-85876867	85876864	15	15	sense	NGG	TAGGCTGAAAGCCAGGACAG	5	RNA2	AD49ZG	RGEN-seq
chr3:86119535-86119554	86119551	38	38	sense	NGG	GCTGCTTCCAGGCTGGAAAG	5	RNA2	AD49ZG	RGEN-seq
chr3:86940029-86940048	86940031	384	381	antisense	NAG	TGTCAAGAAAGACTGGAAAA	5	RNA2	AD49ZG	RGEN-seq
chr3:87274912-87274931	87274928	5	5	sense	NGG	ACTCATGCAAGACTGCAAAG	5	RNA2	AD49ZG	RGEN-seq
chr3:87303828-87303847	87303844	7	7	sense	NGG	CCTGCTGAAAGTCTGGACCA	5	RNA2	AD49ZG	RGEN-seq
chr3:88203544-88203563	88203546	189	188	antisense	NAG	CCTACTGAAATACTGATAAG	5	RNA2	AD49ZG	RGEN-seq
chr3:88400993-88401012	88400995	481	476	antisense	NAG	ACCCATGAAAGACTGAAAAG	5	RNA2	AD49ZG	RGEN-seq
chr3:88545064-88545083	88545080	68	66	sense	NAG	GCTGCTGAAAGAAGGGAAAG	3	RNA2	AD49ZG	RGEN-seq
chr3:89735149-89735168	89735151	341	341	antisense	NGG	TCTACATAAACACTGGAATG	5	RNA2	AD49ZG	RGEN-seq
chr3:90944300-90944319	90944316	21	21	sense	NGG	TCTGATAAGAATCTGGAAAG	5	RNA2	AD49ZG	RGEN-seq
chr3:92108572-92108591	92108574	7	7	antisense	NAG	GCTGCTGAAAGAAAGAAAAG	4	RNA2	AD49ZG	RGEN-seq
chr3:93203830-93203849	93203846	98	96	sense	NGG	GATGATGTAAGACTGGAAAC	5	RNA2	AD49ZG	RGEN-seq
chr3:95454557-95454576	95454573	135	135	sense	NAG	TCTAATGAGAAACTGAAAAG	5	RNA2	AD49ZG	RGEN-seq
chr3:97902701-97902720	97902703	4	4	antisense	NAG	TCTGTAGATAGACAGGAAAT	5	RNA2	AD49ZG	RGEN-seq
chr3:104345660-104345679	104345662	67	67	antisense	NAG	TCCACTAAAAGACTGAAAAT	5	RNA2	AD49ZG	RGEN-seq
chr3:105587286-105587305	105587302	11	11	sense	NAG	CATGGTGACAGACTGAAAAG	5	RNA2	AD49ZG	RGEN-seq
chr3:106286289-106286308	106286305	540	534	sense	NGG	TAAACTGAAAGACTGAAAAA	5	RNA2	AD49ZG	RGEN-seq
chr3:106638034-106638053	106638050	4	4	sense	NGG	TCTGAAGATTGAGTGGAAAG	5	RNA2	AD49ZG	RGEN-seq
chr3:107722722-107722741	107722738	475	475	sense	NGG	TTTGCTGACAAACTAGAAAG	4	RNA2	AD49ZG	RGEN-seq
chr3:107971044-107971063	107971046	283	282	antisense	NGG	GGTGCTGTAAGACTAGCAAG	5	RNA2	AD49ZG	RGEN-seq
chr3:109941694-109941713	109941710	52	49	sense	NAG	AGTTCTGAAAGACTGGAGAA	5	RNA2	AD49ZG	RGEN-seq
chr3:112315463-112315482	112315465	4	4	antisense	NGG	TTTCCTGATAGACTGGGATG	5	RNA2	AD49ZG	RGEN-seq
chr3:113215926-113215945	113215928	29	27	antisense	NAG	TAGTCTTAAAGACTGGAAAT	5	RNA2	AD49ZG	RGEN-seq
chr3:116278079-116278098	116278095	5	5	sense	NGG	TATGCTGAAATACTGTGTAG	5	RNA2	AD49ZG	RGEN-seq
chr3:117860971-117860990	117860987	317	313	sense	NGG	CAAGCTTAAAGCCTGGAAAG	5	RNA2	AD49ZG	RGEN-seq
chr3:118920077-118920096	118920093	221	221	sense	NGG	TCTGTTGTAAAACTGACAAG	5	RNA2	AD49ZG	RGEN-seq
chr3:119360249-119360268	119360265	3	3	sense	NAG	TCTACTCAAGAACTGGAGAG	5	RNA2	AD49ZG	RGEN-seq
chr3:120252077-120252096	120252093	118	118	sense	NGG	TAGGCTGAAAGACAAGGAAG	5	RNA2	AD49ZG	RGEN-seq
chr3:126771563-126771582	126771579	3	3	sense	NAG	TCTAATGAGAGACAGAAAAG	5	RNA2	AD49ZG	RGEN-seq
chr3:128963255-128963274	128963271	6	6	sense	NGG	ACAGCTGAAGGACTTCAAAG	5	RNA2	AD49ZG	RGEN-seq
chr3:130777792-130777811	130777794	345	225	antisense	NAG	GATGATGAAAGAAAGGAAAG	5	RNA2	AD49ZG	RGEN-seq
chr3:133091009-133091028	133091025	49	48	sense	NAG	ACTGCTGAATAACTGAATAG	5	RNA2	AD49ZG	RGEN-seq
chr3:134301023-134301042	134301025	16	16	antisense	NAG	TCACTTTAAAGACTAGAAAG	5	RNA2	AD49ZG	RGEN-seq
chr3:134897210-134897229	134897212	17	17	antisense	NGG	TCTTCTGAACTACTGAAAAA	5	RNA2	AD49ZG	RGEN-seq
chr3:135478947-135478966	135478949	4	4	antisense	NAG	TCTGCAGTAGAACTGGAGAG	5	RNA2	AD49ZG	RGEN-seq
chr3:138890502-138890521	138890504	62	61	antisense	NAG	ACAACTAAAAGACTGGAAAA	5	RNA2	AD49ZG	RGEN-seq
chr3:138900302-138900321	138900318	435	431	sense	NGG	TTGGCTAAAAGACTGGAGAG	4	RNA2	AD49ZG	RGEN-seq
chr3:139641232-139641251	139641234	15	15	antisense	NAG	TTTGCTTAAACACTGGAAAA	4	RNA2	AD49ZG	RGEN-seq
chr3:140661673-140661692	140661675	5	5	antisense	NGG	TCTGCAGATAGACAAAAAAG	5	RNA2	AD49ZG	RGEN-seq
chr3:141581235-141581254	141581251	469	466	sense	NGG	CATACTGAAAGAGAGGAAAG	5	RNA2	AD49ZG	RGEN-seq
chr3:141616702-141616721	141616718	206	204	sense	NGG	AATGCAGAAAGAATGGATAG	5	RNA2	AD49ZG	RGEN-seq
chr3:142855084-142855103	142855100	192	190	sense	NGG	TCTACAGAAATACTGTAACG	5	RNA2	AD49ZG	RGEN-seq
chr3:142877436-142877455	142877452	142	142	sense	NGG	TTTGCTGATGGACTAAAAAG	5	RNA2	AD49ZG	RGEN-seq
chr3:144278605-144278624	144278621	55	55	sense	NAG	TCTAATGAGAGACAGGAAAG	4	RNA2	AD49ZG	RGEN-seq
chr3:144621154-144621173	144621170	229	227	sense	NAG	GCAGCTGCAAGACTGGACAG	4	RNA2	AD49ZG	RGEN-seq
chr3:145060608-145060627	145060624	12	12	sense	NAG	GTTGCAGAAAGACAGTAAAG	5	RNA2	AD49ZG	RGEN-seq
chr3:146023204-146023223	146023206	9	9	antisense	NGG	TGTGCTGACAGTCTGGAGAG	4	RNA2	AD49ZG	RGEN-seq
chr3:147476798-147476817	147476814	4	4	sense	NGG	TCTACTGAGAGACCAAAAAG	5	RNA2	AD49ZG	RGEN-seq
chr3:150051649-150051668	150051651	78	77	antisense	NGG	ACTGCTGTGTGACAGGAAAG	5	RNA2	AD49ZG	RGEN-seq
chr3:151098234-151098253	151098250	313	311	sense	NGG	CATACTGAAAGAGTGGAGAG	5	RNA2	AD49ZG	RGEN-seq
chr3:151533891-151533910	151533893	392	387	antisense	NAG	AATGCAAAAAGACTGGATAG	5	RNA2	AD49ZG	RGEN-seq
chr3:152484182-152484201	152484184	5	4	antisense	NGG	TGTGCTGAAGGAATAAAAAG	5	RNA2	AD49ZG	RGEN-seq
chr3:152499997-152500016	152499999	98	98	antisense	NAG	AATGCAGAAAGAATAGAAAG	5	RNA2	AD49ZG	RGEN-seq
chr3:154498318-154498337	154498334	277	272	sense	NGG	ACTGCTGTGTGACTGGAATG	5	RNA2	AD49ZG	RGEN-seq
chr3:155563524-155563543	155563540	409	406	sense	NAG	ACAACTGAAAAACTGGAGAG	5	RNA2	AD49ZG	RGEN-seq
chr3:157413334-157413353	157413350	131	131	sense	NGG	TGTGCAGTAAGACTAGGAAG	5	RNA2	AD49ZG	RGEN-seq
chr3:157627761-157627780	157627763	7	7	antisense	NGG	TATGCAGAAACAGTGAAAAG	5	RNA2	AD49ZG	RGEN-seq
chr3:158028844-158028863	158028860	7	7	sense	NAG	TCAGCTGAATAACAGGAAAG	4	RNA2	AD49ZG	RGEN-seq
chr3:162406321-162406340	162406337	179	117	sense	NAG	ACTGCAGAAAGACTGGGAAA	4	RNA2	AD49ZG	RGEN-seq
chr3:163583764-163583783	163583780	13	13	sense	NGG	TAAGCTGAAAGCCTTGAAAT	5	RNA2	AD49ZG	RGEN-seq
chr3:163791779-163791798	163791781	200	199	antisense	NAG	CTTCCTGAAAGACTTGAAAG	4	RNA2	AD49ZG	RGEN-seq
chr3:163920968-163920987	163920984	6	3	sense	NAG	TGTGCAGAAAGACATGAAAA	5	RNA2	AD49ZG	RGEN-seq
chr3:165115604-165115623	165115606	56	56	antisense	NGG	TCTAATGAAAGACAGAAAGG	5	RNA2	AD49ZG	RGEN-seq
chr3:165335754-165335773	165335770	24	20	sense	NAG	TTTCCTGAAAGACTGGATGT	5	RNA2	AD49ZG	RGEN-seq
chr3:167290009-167290028	167290025	172	170	sense	NGG	GTTCCTGAAAGACAGGAGAG	5	RNA2	AD49ZG	RGEN-seq
chr3:169924863-169924882	169924879	24	17	sense	NGG	TTTCATGAAACACTGGAAAA	5	RNA2	AD49ZG	RGEN-seq
chr3:170495862-170495881	170495864	204	203	antisense	NGG	CCTTCTGAATGACAGGAAAG	4	RNA2	AD49ZG	RGEN-seq
chr3:172541826-172541845	172541828	4	3	antisense	NGG	TATTGTGAGAGACGGGAAAG	5	RNA2	AD49ZG	RGEN-seq
chr3:172564098-172564117	172564114	8	8	sense	NGG	CCTGTGGAAAGGCAGGAAAG	5	RNA2	AD49ZG	RGEN-seq
chr3:173011752-173011771	173011754	166	166	antisense	NGG	TCTGCCCATAAACAGGAAAG	5	RNA2	AD49ZG	RGEN-seq
chr3:174624650-174624669	174624652	6	6	antisense	NAG	TCTAATGAGAGACAGAAAAG	5	RNA2	AD49ZG	RGEN-seq
chr3:175010936-175010955	175010952	55	55	sense	NGG	TCTTCTAGAAGGTTGGAAAG	5	RNA2	AD49ZG	RGEN-seq
chr3:175167151-175167170	175167153	291	290	antisense	NGG	TCTGAAGAAAGACAAGAAAA	5	RNA2	AD49ZG	RGEN-seq
chr3:177737540-177737559	177737542	8	8	antisense	NAG	GTTGCTGAGAGACTAGAAAC	5	RNA2	AD49ZG	RGEN-seq
chr3:180064001-180064020	180064017	16	16	sense	NGG	ACTGCTGACAGAGTGGAAAA	4	RNA2	AD49ZG	RGEN-seq
chr3:180453947-180453966	180453949	203	202	antisense	NAG	ACTACTGAAAGAATAGAAAG	4	RNA2	AD49ZG	RGEN-seq
chr3:182556208-182556227	182556224	46	46	sense	NGG	CCTCCAGAAAGAATGGAAAC	5	RNA2	AD49ZG	RGEN-seq
chr3:183615054-183615073	183615056	7	7	antisense	NAG	TCTGCTGAAGACAAGGAAAG	5	RNA2	AD49ZG	RGEN-seq
chr3:185077305-185077324	185077321	393	378	sense	NAG	AATGCTGAAAGACTGGAGAG	3	RNA2	AD49ZG	RGEN-seq
chr3:185525823-185525842	185525839	14	13	sense	NAG	TCTAATGAAAGTCAGGAAAG	4	RNA2	AD49ZG	RGEN-seq
chr3:187914563-187914582	187914565	5	5	antisense	NGG	CCTGCTGAGGGCCTGGAAAA	5	RNA2	AD49ZG	RGEN-seq
chr3:187989949-187989968	187989951	9	9	antisense	NAG	TTTATTGAGAGGCTGGAAAG	5	RNA2	AD49ZG	RGEN-seq
chr3:188315560-188315579	188315562	24	18	antisense	NAG	TTTCATTAAAGAATGGAAAG	5	RNA2	AD49ZG	RGEN-seq
chr3:189707927-189707946	189707943	8	7	sense	NAG	TCCACAGAAAGACTGGAACT	5	RNA2	AD49ZG	RGEN-seq
chr3:192114071-192114090	192114087	8	8	sense	NAG	ACTCATGAAAAACTGGAAAA	5	RNA2	AD49ZG	RGEN-seq
chr3:195821073-195821092	195821089	24	24	sense	NAG	TGTTATGAAAGACTGTAAAG	4	RNA2	AD49ZG	RGEN-seq
chr3:197013489-197013508	197013491	345	343	antisense	NGG	CATGCAGGAAGACTGGAAAC	5	RNA2	AD49ZG	RGEN-seq
chr3:197015894-197015913	197015910	26	26	sense	NGG	CCTGCTGAGAGACTGGCTAT	5	RNA2	AD49ZG	RGEN-seq
chr3:201855115-201855134	201855131	33	13	sense	NGG	TCTACTGGGAGACTGGAGAA	5	RNA2	AD49ZG	RGEN-seq
chr3:202166507-202166526	202166509	7	6	antisense	NGG	GCTGCTGACTGACTGGATGG	5	RNA2	AD49ZG	RGEN-seq
chr3:202252595-202252614	202252611	7	7	sense	NGG	TCTAATGAGAGACAGGAAGG	5	RNA2	AD49ZG	RGEN-seq
chr3:203205515-203205534	203205531	10	10	sense	NGG	CCTGCTCAAAGACTGGGGTG	5	RNA2	AD49ZG	RGEN-seq
chr3:207486800-207486819	207486816	30	29	sense	NGG	TTTTTAGATAGACTGGAAAG	5	RNA2	AD49ZG	RGEN-seq
chr3:210663607-210663626	210663609	13	13	antisense	NGG	TCTGCTGCTACACAGGAAAG	4	RNA2	AD49ZG	RGEN-seq
chr3:212580037-212580056	212580039	622	620	antisense	NAG	GTTGCTAAAATACTGGAAAG	4	RNA2	AD49ZG	RGEN-seq
chr3:212952549-212952568	212952551	414	411	antisense	NGG	ACTACTGAAAGACTGAAACA	5	RNA2	AD49ZG	RGEN-seq
chr3:213444099-213444118	213444101	7	7	antisense	NAG	TCTACTAAAAGACTGCTAAG	4	RNA2	AD49ZG	RGEN-seq
chr3:213625026-213625045	213625028	3	3	antisense	NGG	TTTTCTGAAAGACAGAACAG	5	RNA2	AD49ZG	RGEN-seq
chr3:213889209-213889228	213889225	8	8	sense	NAG	TGCTCTGGAATACTGGAAAG	5	RNA2	AD49ZG	RGEN-seq
chr3:214696719-214696738	214696735	6	6	sense	NAG	TGTACAGAAAGACAGGAAAT	5	RNA2	AD49ZG	RGEN-seq
chr3:217121823-217121842	217121839	454	451	sense	NGG	TCTAATGAAAGACAGGAGAG	4	RNA2	AD49ZG	RGEN-seq
chr3:217448057-217448076	217448073	269	268	sense	NGG	TATGCAGAAAGTCAGGAAAG	4	RNA2	AD49ZG	RGEN-seq
chr3:222974660-222974679	222974676	9	9	sense	NGG	GCTCCTGGAAGACTGGTAGG	5	RNA2	AD49ZG	RGEN-seq
chr3:224111771-224111790	224111787	7	3	sense	NGG	TTTTCTGAAAGACTGAACAC	5	RNA2	AD49ZG	RGEN-seq
chr3:225542456-225542475	225542458	10	10	antisense	NGG	ATTGGTGAGAGTCTGGAAAG	5	RNA2	AD49ZG	RGEN-seq
chr3:226331731-226331750	226331733	4	4	antisense	NGG	TCTGCCCAGAGACAGGGAAG	5	RNA2	AD49ZG	RGEN-seq
chr3:226468568-226468587	226468570	319	315	antisense	NGG	GCTGCAGACAAACTGGAATG	5	RNA2	AD49ZG	RGEN-seq
chr3:227508911-227508930	227508927	456	452	sense	NAG	TACTGTGAAAGACTGAAAAG	5	RNA2	AD49ZG	RGEN-seq
chr3:228081511-228081530	228081527	98	98	sense	NGG	TGATCTGAAAGGATGGAAAG	5	RNA2	AD49ZG	RGEN-seq
chr3:228360937-228360956	228360939	48	47	antisense	NGG	TCTACTCATAGCCTGAAAAG	5	RNA2	AD49ZG	RGEN-seq
chr3:229078736-229078755	229078738	246	245	antisense	NAG	AATGCTGATAAACTGGAAAC	5	RNA2	AD49ZG	RGEN-seq
chr3:230815971-230815990	230815973	6	6	antisense	NGG	CATGCTGAAAGTCTGGACAC	5	RNA2	AD49ZG	RGEN-seq
chr3:232836885-232836904	232836887	8	8	antisense	NGG	TCTGCTGTGGGGCTGGAAAA	5	RNA2	AD49ZG	RGEN-seq
chr3:234651679-234651698	234651695	47	45	sense	NGG	TTTAATGAAAGAATGGACAG	5	RNA2	AD49ZG	RGEN-seq
chr3:236201150-236201169	236201152	10	10	antisense	NAG	GATGTTGAAACATTGGAAAG	5	RNA2	AD49ZG	RGEN-seq
chr3:237308568-237308587	237308570	320	320	antisense	NGG	TCTTGTGAAAGATTGATAAG	5	RNA2	AD49ZG	RGEN-seq
chr3:238615484-238615503	238615500	15	14	sense	NGG	TTAGCAGAAAGAGTGCAAAG	5	RNA2	AD49ZG	RGEN-seq
chr3:238850228-238850247	238850244	81	81	sense	NGG	TTTGCAGAAAGACTGGGAGT	5	RNA2	AD49ZG	RGEN-seq
chr3:240951321-240951340	240951323	18	17	antisense	NAG	TATCATGAAAGACTGAGAAG	5	RNA2	AD49ZG	RGEN-seq
chr3:241008607-241008626	241008623	444	443	sense	NGG	AGAGCTGTAAGACTAGAAAG	5	RNA2	AD49ZG	RGEN-seq
chr3:242242480-242242499	242242496	35	35	sense	NGG	CTTGCTGAGGGACAGGAAAG	5	RNA2	AD49ZG	RGEN-seq
chr3:245122836-245122855	245122852	25	24	sense	NAG	TCTAATTCAAGACTGGAATG	5	RNA2	AD49ZG	RGEN-seq
chr3:245733918-245733937	245733920	297	294	antisense	NGG	TTCTCTGAAAGGCTGGACAG	5	RNA2	AD49ZG	RGEN-seq
chr3:245783002-245783021	245783018	454	453	sense	NGG	ACTGCTGAAAGGATGGAAAG	3	RNA2	AD49ZG	RGEN-seq
chr3:246063888-246063907	246063904	31	31	sense	NGG	GCAGCTGTGAGACTGGACAG	5	RNA2	AD49ZG	RGEN-seq
chr3:249355076-249355095	249355078	286	284	antisense	NGG	GATGCTCTAAGAATGGAAAG	5	RNA2	AD49ZG	RGEN-seq
chr3:249667367-249667386	249667383	11	11	sense	NAG	TAAGATGAAACACTGGAACG	5	RNA2	AD49ZG	RGEN-seq
chr3:250527692-250527711	250527694	9	9	antisense	NAG	AGTGGTGAAAGACTAGACAG	5	RNA2	AD49ZG	RGEN-seq
chr3:250821000-250821019	250821002	431	428	antisense	NGG	TGAACAGAAAGACTGGAAAA	5	RNA2	AD49ZG	RGEN-seq
chr3:251732429-251732448	251732431	10	10	antisense	NAG	TGGGCAGAAAGAATAGAAAG	5	RNA2	AD49ZG	RGEN-seq
chr3:254558339-254558358	254558341	3	3	antisense	NAG	TCTGACAAAATACTGGACAG	5	RNA2	AD49ZG	RGEN-seq
chr3:256768402-256768421	256768418	5	5	sense	NGG	CCTGCTGAAAAAGTGAAATG	5	RNA2	AD49ZG	RGEN-seq
chr3:257760695-257760714	257760711	98	96	sense	NAG	AATGCTGAAATACTGGCAAG	4	RNA2	AD49ZG	RGEN-seq
chr3:258613574-258613593	258613576	17	17	antisense	NGG	TCTGGAGAAAGAATGAAAGG	5	RNA2	AD49ZG	RGEN-seq
chr3:260384173-260384192	260384175	8	4	antisense	NGG	TCCCCTGAAGGACAGGAAAG	4	RNA2	AD49ZG	RGEN-seq
chr3:260769376-260769395	260769378	59	56	antisense	NGG	TTTTATGAAAGACAGAAAAG	5	RNA2	AD49ZG	RGEN-seq
chr3:261210603-261210622	261210605	171	169	antisense	NGG	CCTGAGCAAAGACTGGAAAT	5	RNA2	AD49ZG	RGEN-seq
chr3:263609301-263609320	263609317	237	234	sense	NGG	TCTGCAGGAAGACTGGAAGT	4	RNA2	AD49ZG	RGEN-seq
chr3:263936847-263936866	263936863	687	678	sense	NGG	AATGCTGATAGACTAGAAAC	5	RNA2	AD49ZG	RGEN-seq
chr3:265040735-265040754	265040737	92	92	antisense	NGG	TCTTCTGAAAGAATGGGATG	4	RNA2	AD49ZG	RGEN-seq
chr3:266885746-266885765	266885748	7	7	antisense	NGG	TCTGTTGGAAGACAAGAATG	5	RNA2	AD49ZG	RGEN-seq
chr3:267032509-267032528	267032525	252	226	sense	NGG	ACTGCAGAAAGACTGGATAC	4	RNA2	AD49ZG	RGEN-seq
chr3:267526131-267526150	267526133	8	8	antisense	NAG	CCTGCTAAACTACTAGAAAG	5	RNA2	AD49ZG	RGEN-seq
chr3:269214610-269214629	269214612	11	11	antisense	NGG	TCAGATGGCAGACTGGAAAT	5	RNA2	AD49ZG	RGEN-seq
chr3:273247151-273247170	273247167	390	386	sense	NAG	CTAGCTGGAGGACTGGAAAG	5	RNA2	AD49ZG	RGEN-seq
chr3:273252368-273252387	273252384	80	66	sense	NGG	TTTTCTGAAAGAAAGGAAAA	5	RNA2	AD49ZG	RGEN-seq
chr3:274101324-274101343	274101326	274	272	antisense	NGG	CCTGCTGTAAGAGTGAAAAG	4	RNA2	AD49ZG	RGEN-seq
chr4:16942-16961	16958	13	13	sense	NAG	TCTGATGAAAACTTGGAAAG	4	RNA2	AD49ZG	RGEN-seq
chr4:120405-120424	120421	49	48	sense	NGG	TGTACAGACAGACTGGAAAT	5	RNA2	AD49ZG	RGEN-seq
chr4:307510-307529	307512	628	624	antisense	NGG	TAAGCTGAAGGTCTGGAAAG	4	RNA2	AD49ZG	RGEN-seq
chr4:1725088-1725107	1725090	21	21	antisense	NAG	TCTGTAACAAGACTAGAAAG	5	RNA2	AD49ZG	RGEN-seq
chr4:3198446-3198465	3198462	13	13	sense	NGG	TCTGGAGAAGGACTGGAGAA	5	RNA2	AD49ZG	RGEN-seq
chr4:4143098-4143117	4143100	335	334	antisense	NGG	ACTGCCGATAGACTGGGGAG	5	RNA2	AD49ZG	RGEN-seq
chr4:6284107-6284126	6284109	555	552	antisense	NAG	CATGCAGAAAGACTGCAAAG	4	RNA2	AD49ZG	RGEN-seq
chr4:6682196-6682215	6682198	51	49	antisense	NGG	TCTAATGAAAGACAGAAAGG	5	RNA2	AD49ZG	RGEN-seq
chr4:7382546-7382565	7382548	9	9	antisense	NAG	ACTACAGAAACACTGGAAAA	5	RNA2	AD49ZG	RGEN-seq
chr4:10861918-10861937	10861934	6	6	sense	NAG	TCAAGTTACAGACTGGAAAG	5	RNA2	AD49ZG	RGEN-seq
chr4:11354593-11354612	11354609	158	155	sense	NAG	TCTTCTGGAAAACTGGAAAC	4	RNA2	AD49ZG	RGEN-seq
chr4:14276421-14276440	14276423	24	24	antisense	NAG	CCTTCTGAAAGATTAAAAAG	5	RNA2	AD49ZG	RGEN-seq
chr4:14296375-14296394	14296391	14	14	sense	NAG	CCTTATGAAAGACTAGAGAG	5	RNA2	AD49ZG	RGEN-seq
chr4:17318965-17318984	17318981	340	340	sense	NAG	TCTAATGAAAGACAGAAAAG	4	RNA2	AD49ZG	RGEN-seq
chr4:18403615-18403634	18403617	16	16	antisense	NGG	GCTGTTGAAGGAATGGAATG	5	RNA2	AD49ZG	RGEN-seq
chr4:20059909-20059928	20059911	4	4	antisense	NGG	GCTGGGGAAAGACTGGGAGG	5	RNA2	AD49ZG	RGEN-seq
chr4:22998430-22998449	22998446	268	263	sense	NGG	TCATTGGAAAGACTGGAAAC	5	RNA2	AD49ZG	RGEN-seq
chr4:23883676-23883695	23883678	376	374	antisense	NGG	GTTCCTGAAAGACTAGAAAC	5	RNA2	AD49ZG	RGEN-seq
chr4:25428465-25428484	25428467	11	11	antisense	NAG	TATGATGAATAACTGGAAAA	5	RNA2	AD49ZG	RGEN-seq
chr4:26083500-26083519	26083516	274	272	sense	NGG	AAGGCTGATAGACTGGAAAG	4	RNA2	AD49ZG	RGEN-seq
chr4:27412171-27412190	27412187	7	7	sense	NGG	TCTGGAGAAGGACTGGAGAA	5	RNA2	AD49ZG	RGEN-seq
chr4:30103587-30103606	30103603	21	21	sense	NAG	GCAGGGGAAAGACTGGCAAG	5	RNA2	AD49ZG	RGEN-seq
chr4:30195960-30195979	30195962	81	76	antisense	NGG	TCTGCAGAAAGATGGGAAAA	4	RNA2	AD49ZG	RGEN-seq
chr4:30315726-30315745	30315742	3	3	sense	NGG	TGTGCTGATGGAATGGAAAT	5	RNA2	AD49ZG	RGEN-seq
chr4:35515993-35516012	35515995	20	20	antisense	NAG	AGTGCTCAAACACTAGAAAG	5	RNA2	AD49ZG	RGEN-seq
chr4:39901820-39901839	39901822	642	641	antisense	NGG	TCTGATAAATAACTGGAAAA	5	RNA2	AD49ZG	RGEN-seq
chr4:41793800-41793819	41793816	36	36	sense	NGG	GCTGATGAAGCACTGGAGAG	5	RNA2	AD49ZG	RGEN-seq
chr4:46456699-46456718	46456715	66	65	sense	NGG	TTTACTGAAAGACTAGACAT	5	RNA2	AD49ZG	RGEN-seq
chr4:51882549-51882568	51882565	5	5	sense	NGG	TGTGAGGAAAGACTGTTAAG	5	RNA2	AD49ZG	RGEN-seq
chr4:52331738-52331757	52331754	244	239	sense	NGG	TCTGCTTTCTGACTGGAAAG	4	RNA2	AD49ZG	RGEN-seq
chr4:53437602-53437621	53437604	5	5	antisense	NGG	TCTGCTGACAGAATAGGAAG	4	RNA2	AD49ZG	RGEN-seq
chr4:53616792-53616811	53616794	40	40	antisense	NGG	TCTGCTGGATAACTGAAAAA	5	RNA2	AD49ZG	RGEN-seq
chr4:54267791-54267810	54267807	25	25	sense	NGG	ACAGCTGAAAGAGTGGAAGT	5	RNA2	AD49ZG	RGEN-seq
chr4:60848020-60848039	60848022	119	117	antisense	NGG	TCAACTGAAACACTGGACAT	5	RNA2	AD49ZG	RGEN-seq
chr4:61051967-61051986	61051983	408	408	sense	NAG	TCTGTGGAAAGACTGGGAAG	3	RNA2	AD49ZG	RGEN-seq
chr4:61213533-61213552	61213549	130	129	sense	NAG	AGTACTAAAAGAATGGAAAG	5	RNA2	AD49ZG	RGEN-seq
chr4:61832568-61832587	61832570	298	295	antisense	NGG	CTAGCTGCAACACTGGAAAG	5	RNA2	AD49ZG	RGEN-seq
chr4:63204909-63204928	63204911	260	259	antisense	NAG	AATGCTGTAAGACAGGAAAG	4	RNA2	AD49ZG	RGEN-seq
chr4:67504091-67504110	67504093	8	5	antisense	NAG	TGTTGTGAGAGACTGGAAGG	5	RNA2	AD49ZG	RGEN-seq
chr4:67729732-67729751	67729734	117	115	antisense	NAG	TGAACAAAAAGACTGGAAAG	5	RNA2	AD49ZG	RGEN-seq
chr4:67862519-67862538	67862535	39	38	sense	NAG	ACTTGGTAAAGACTGGAAAG	5	RNA2	AD49ZG	RGEN-seq
chr4:70998995-70999014	70998997	239	236	antisense	NAG	TCTGCAATAAGCCTGGAAAG	4	RNA2	AD49ZG	RGEN-seq
chr4:72759455-72759474	72759471	501	498	sense	NGG	CCTGCTTAAAGACAGGAGAG	4	RNA2	AD49ZG	RGEN-seq
chr4:76131741-76131760	76131743	292	167	antisense	NGG	GATTTTGAAAGACAGGAAAG	5	RNA2	AD49ZG	RGEN-seq
chr4:79710397-79710416	79710399	8	8	antisense	NGG	TCATCTGAAAGACTGGCATT	5	RNA2	AD49ZG	RGEN-seq
chr4:80388531-80388550	80388547	117	117	sense	NAG	ACTTCTGAAAGACTGGTTAG	4	RNA2	AD49ZG	RGEN-seq
chr4:82162934-82162953	82162936	187	156	antisense	NGG	CCTGCTGGAAGACTGTGAAA	5	RNA2	AD49ZG	RGEN-seq
chr4:83606225-83606244	83606241	504	496	sense	NGG	GCTGCAGGAAGACTGGAGTG	5	RNA2	AD49ZG	RGEN-seq
chr4:83795720-83795739	83795736	20	20	sense	NGG	TCTGCTAGAAATCTGGTAAG	5	RNA2	AD49ZG	RGEN-seq
chr4:84248982-84249001	84248984	188	187	antisense	NGG	TCTTCCAAAAGACTAGAAGG	5	RNA2	AD49ZG	RGEN-seq
chr4:84912738-84912757	84912754	3	3	sense	NAG	TGTTAGGAAGGACTGGAAAG	5	RNA2	AD49ZG	RGEN-seq
chr4:85245675-85245694	85245677	5	4	antisense	NGG	TGTGGTGAATGACTGGGAAG	4	RNA2	AD49ZG	RGEN-seq
chr4:85977272-85977291	85977288	17	17	sense	NAG	ACAGCTGAAAGAATGAAAAT	5	RNA2	AD49ZG	RGEN-seq
chr4:86452838-86452857	86452854	12	12	sense	NAG	TCTAGGCAAAAACTGGAAAG	5	RNA2	AD49ZG	RGEN-seq
chr4:86784849-86784868	86784851	8	7	antisense	NGG	TTTGCTGACAGATTGGAAGT	5	RNA2	AD49ZG	RGEN-seq
chr4:87023057-87023076	87023073	10	10	sense	NAG	TCTGCTTCAAGACTAGAAAC	4	RNA2	AD49ZG	RGEN-seq
chr4:88341548-88341567	88341550	12	11	antisense	NGG	TCTCTATAAAAACTGGAAAG	5	RNA2	AD49ZG	RGEN-seq
chr4:88705186-88705205	88705202	18	17	sense	NGG	ACTGCAGAAAGACTGGGGAA	5	RNA2	AD49ZG	RGEN-seq
chr4:90295041-90295060	90295043	78	76	antisense	NGG	TCTGCATAGGGGCTGGAAAG	5	RNA2	AD49ZG	RGEN-seq
chr4:91411475-91411494	91411491	21	21	sense	NAG	ACTGCTGAAACATTGAAAAG	4	RNA2	AD49ZG	RGEN-seq
chr4:92541278-92541297	92541280	102	101	antisense	NGG	CCTACTCAAAGCTTGGAAAG	5	RNA2	AD49ZG	RGEN-seq
chr4:93298275-93298294	93298291	32	32	sense	NAG	ATTATTGAAAGTCTGGAAAG	5	RNA2	AD49ZG	RGEN-seq
chr4:93833220-93833239	93833236	11	11	sense	NGG	TATGTTTAAAGACTGGGAGG	5	RNA2	AD49ZG	RGEN-seq
chr4:93858212-93858231	93858228	353	346	sense	NGG	CTTGCTGAAGGACTGGATAA	5	RNA2	AD49ZG	RGEN-seq
chr4:99587402-99587421	99587418	9	9	sense	NAG	AATGCTGAGAGACTAGAAGG	5	RNA2	AD49ZG	RGEN-seq
chr4:100140214-100140233	100140216	13	13	antisense	NGG	GCAGGAGGAAGACTGGAAAG	5	RNA2	AD49ZG	RGEN-seq
chr4:100332221-100332240	100332237	3	3	sense	NAG	TCAGCTGAAAGAAAGAAAAG	4	RNA2	AD49ZG	RGEN-seq
chr4:104376028-104376047	104376044	3	3	sense	NAG	TGTCTTGAAAAACTGGAAAA	5	RNA2	AD49ZG	RGEN-seq
chr4:104944212-104944231	104944214	89	88	antisense	NGG	TCTGGCAAAGGATTGGAAAG	5	RNA2	AD49ZG	RGEN-seq
chr4:109029875-109029894	109029891	4	3	sense	NGG	ACTGCTGAAAGAGGGATAAG	5	RNA2	AD49ZG	RGEN-seq
chr4:109914687-109914706	109914703	141	140	sense	NAG	TCTAATGAAAGACTGAAAGG	4	RNA2	AD49ZG	RGEN-seq
chr4:114129497-114129516	114129499	396	394	antisense	NAG	AATACATAAAGACTGGAAAG	5	RNA2	AD49ZG	RGEN-seq
chr4:117293376-117293395	117293392	173	171	sense	NGG	TATGCTTAAAAGCTGAAAAG	5	RNA2	AD49ZG	RGEN-seq
chr4:117458784-117458803	117458800	7	7	sense	NGG	TCAGCTGGATTATTGGAAAG	5	RNA2	AD49ZG	RGEN-seq
chr4:121955531-121955550	121955533	5	4	antisense	NGG	TCTCCTATAATACTGGACAG	5	RNA2	AD49ZG	RGEN-seq
chr4:124736352-124736371	124736368	8	8	sense	NAG	CATGCTCAAAGACTGGTAGG	5	RNA2	AD49ZG	RGEN-seq
chr4:126112408-126112427	126112424	10	10	sense	NAG	TTTCATTAAAGACTGGAAAT	5	RNA2	AD49ZG	RGEN-seq
chr4:127342569-127342588	127342571	6	6	antisense	NGG	TGTGATGAAGGAATGAAAAG	5	RNA2	AD49ZG	RGEN-seq
chr4:127987286-127987305	127987302	13	13	sense	NGG	TCTCTGCAAAGACTTGAAAG	5	RNA2	AD49ZG	RGEN-seq
chr4:128180719-128180738	128180735	326	325	sense	NGG	CATGCTGAAAGACCAGAAAG	4	RNA2	AD49ZG	RGEN-seq
chr4:128836425-128836444	128836441	21	21	sense	NGG	ACAGCTGAAGGACTGGAGAC	5	RNA2	AD49ZG	RGEN-seq
chr4:129514458-129514477	129514460	8	8	antisense	NGG	TTTACTGAGTGCCTGGAAAG	5	RNA2	AD49ZG	RGEN-seq
chr4:132252588-132252607	132252604	500	490	sense	NAG	AGGGCTGAAAGACTAGAAAG	4	RNA2	AD49ZG	RGEN-seq
chr4:133966470-133966489	133966486	3	3	sense	NGG	TCTGTGGCAAGAATGGAAAT	5	RNA2	AD49ZG	RGEN-seq
chr4:135125739-135125758	135125741	199	196	antisense	NGG	TGAGCTGAAACACAGGAAAG	4	RNA2	AD49ZG	RGEN-seq
chr4:135165284-135165303	135165286	15	14	antisense	NAG	TCTAATGAAAGATAGAAAAG	5	RNA2	AD49ZG	RGEN-seq
chr4:138911421-138911440	138911437	11	11	sense	NGG	TTTGCTGAGAAACAGGAAGG	5	RNA2	AD49ZG	RGEN-seq
chr4:140820123-140820142	140820125	77	77	antisense	NAG	CCTACTGAAAGACAGGAAAT	4	RNA2	AD49ZG	RGEN-seq
chr4:143268079-143268098	143268081	118	116	antisense	NGG	TAGACAGAAAGAGTGGAAAG	5	RNA2	AD49ZG	RGEN-seq
chr4:146640835-146640854	146640851	117	117	sense	NGG	TCTGTGAAAAGACTGGGATG	5	RNA2	AD49ZG	RGEN-seq
chr4:147456591-147456610	147456593	11	9	antisense	NAG	TAGGCTGAAAAACTATAAAG	5	RNA2	AD49ZG	RGEN-seq
chr4:151695951-151695970	151695967	56	54	sense	NAG	TCAGAGTAAAGACTAGAAAG	5	RNA2	AD49ZG	RGEN-seq
chr4:155346814-155346833	155346830	92	92	sense	NAG	ACTGCAGAGGGACTGGAAAG	4	RNA2	AD49ZG	RGEN-seq
chr4:155587692-155587711	155587694	30	30	antisense	NAG	ACAGCTGAGAGAATGGAATG	5	RNA2	AD49ZG	RGEN-seq
chr4:159637472-159637491	159637488	4	4	sense	NGG	TCTGGGGATAAACTGCAAAG	5	RNA2	AD49ZG	RGEN-seq
chr4:160744005-160744024	160744021	97	97	sense	NGG	TCTGAAGAAGGACTGGAGAA	5	RNA2	AD49ZG	RGEN-seq
chr4:161041129-161041148	161041131	4	4	antisense	NAG	GCTGCTCTGACACTGGAAAG	5	RNA2	AD49ZG	RGEN-seq
chr4:162142187-162142206	162142203	4	3	sense	NGG	TCTGCTTGAATACTGTAAAC	5	RNA2	AD49ZG	RGEN-seq
chr4:162543383-162543402	162543399	434	426	sense	NGG	GCTACTGAAATATTAGAAAG	5	RNA2	AD49ZG	RGEN-seq
chr4:163970412-163970431	163970428	10	10	sense	NGG	TCTAAGGAAAGACAGGGAAG	5	RNA2	AD49ZG	RGEN-seq
chr4:165780004-165780023	165780006	34	33	antisense	NGG	CCTGCGGAAGGACTAGATAG	5	RNA2	AD49ZG	RGEN-seq
chr4:167354838-167354857	167354854	79	78	sense	NGG	TGAGCTGAAAGCCTGTAAAG	4	RNA2	AD49ZG	RGEN-seq
chr4:168146782-168146801	168146784	24	24	antisense	NGG	TTTCCTGGAAGACTGGGATG	5	RNA2	AD49ZG	RGEN-seq
chr4:168830996-168831015	168831012	99	98	sense	NGG	ACTGCTGCTGGACTGGTAAG	5	RNA2	AD49ZG	RGEN-seq
chr4:169658314-169658333	169658316	5	5	antisense	NGG	TCTGCTGGAAGCCTATAAAA	5	RNA2	AD49ZG	RGEN-seq
chr4:169716619-169716638	169716635	23	23	sense	NGG	TCTGCTCAAAGGATGGAATG	4	RNA2	AD49ZG	RGEN-seq
chr4:174352315-174352334	174352331	9	9	sense	NAG	TATGTGGAAAAACTGGAAAT	5	RNA2	AD49ZG	RGEN-seq
chr4:177471842-177471861	177471844	38	37	antisense	NGG	CCTACTGGAAGACTGGCAGG	5	RNA2	AD49ZG	RGEN-seq
chr4:177509747-177509766	177509749	43	43	antisense	NAG	TCAGCAGATAGACTGGAAAA	4	RNA2	AD49ZG	RGEN-seq
chr4:177810112-177810131	177810114	10	10	antisense	NGG	TCTGTTCAAAAACAGAAAAG	5	RNA2	AD49ZG	RGEN-seq
chr4:178568538-178568557	178568540	14	14	antisense	NGG	TCAGAAGGAAGACAGGAAAG	5	RNA2	AD49ZG	RGEN-seq
chr4:179563244-179563263	179563246	101	100	antisense	NGG	TCAGCTGTAAAAATGGAAAA	5	RNA2	AD49ZG	RGEN-seq
chr4:180789503-180789522	180789519	217	217	sense	NGG	TTGGCTGAAGGACTGGGAAG	4	RNA2	AD49ZG	RGEN-seq
chr4:181524396-181524415	181524412	348	343	sense	NAG	TCTGCACAGAAACTGGAAAG	4	RNA2	AD49ZG	RGEN-seq
chr4:183782628-183782647	183782644	513	512	sense	NAG	TTCTCTAAAAGACTGAAAAG	5	RNA2	AD49ZG	RGEN-seq
chr4:183932899-183932918	183932901	348	347	antisense	NGG	TCTGACAAAAGACTGGTGAG	5	RNA2	AD49ZG	RGEN-seq
chr4:184372102-184372121	184372104	196	196	antisense	NGG	TCTGATATAAAACTGGAAAC	5	RNA2	AD49ZG	RGEN-seq
chr4:184846815-184846834	184846817	273	268	antisense	NGG	TCACATGAAAGACTGGATTG	5	RNA2	AD49ZG	RGEN-seq
chr4:185730315-185730334	185730331	164	163	sense	NAG	GCTGCTAAAATACTGATAAG	5	RNA2	AD49ZG	RGEN-seq
chr4:189869732-189869751	189869734	129	127	antisense	NGG	CCTGCTCAAATACTGAAGAG	5	RNA2	AD49ZG	RGEN-seq
chr4:189993963-189993982	189993979	420	417	sense	NGG	ATTGCTGACAGACTGGAAGA	5	RNA2	AD49ZG	RGEN-seq
chr4:191782506-191782525	191782522	4	4	sense	NGG	TCTGCTTATAGACTGTCCAG	5	RNA2	AD49ZG	RGEN-seq
chr4:194439303-194439322	194439319	3	3	sense	NAG	GATGTTGAAGGACTGGAGAG	5	RNA2	AD49ZG	RGEN-seq
chr4:196484145-196484164	196484147	338	337	antisense	NAG	TATGGAGAAAGAATGGAAAG	4	RNA2	AD49ZG	RGEN-seq
chr4:196539871-196539890	196539887	4	4	sense	NAG	TCTTCTGAGAAACTGAAAAG	4	RNA2	AD49ZG	RGEN-seq
chr4:197432057-197432076	197432073	132	132	sense	NGG	TTTCATGAAATACTGGAAAA	5	RNA2	AD49ZG	RGEN-seq
chr4:197614418-197614437	197614420	15	11	antisense	NGG	TTTGCTCAAAGATTGGGAAA	5	RNA2	AD49ZG	RGEN-seq
chr4:198009494-198009513	198009510	10	10	sense	NAG	CCTGCCGAAGAACTAGAAAG	5	RNA2	AD49ZG	RGEN-seq
chr4:199490635-199490654	199490651	176	175	sense	NAG	TTGTCTGAAAGATTGGAAAT	5	RNA2	AD49ZG	RGEN-seq
chr4:199876529-199876548	199876531	41	41	antisense	NGG	CCTGCTGAAAGTCTGAATTG	5	RNA2	AD49ZG	RGEN-seq
chr4:201105341-201105360	201105357	393	392	sense	NGG	TCTACTGAGAGACAGAAAAG	4	RNA2	AD49ZG	RGEN-seq
chr4:201975932-201975951	201975948	227	226	sense	NGG	TCAACTGAGAGACTCAAAAG	5	RNA2	AD49ZG	RGEN-seq
chr4:202799861-202799880	202799877	375	369	sense	NAG	TGTGCAGAAAGACAGGAAAT	4	RNA2	AD49ZG	RGEN-seq
chr4:202902978-202902997	202902980	27	27	antisense	NGG	TGTACTGAAAGACTGGTAGA	5	RNA2	AD49ZG	RGEN-seq
chr4:210345284-210345303	210345300	10	10	sense	NGG	TGTGGTGAGAGGCTGGAAAT	5	RNA2	AD49ZG	RGEN-seq
chr4:210882861-210882880	210882877	9	7	sense	NAG	TCTCCTGAAACACTGAGAAA	5	RNA2	AD49ZG	RGEN-seq
chr4:212783283-212783302	212783299	5	5	sense	NAG	TACCCTGAAAGATTGGCAAG	5	RNA2	AD49ZG	RGEN-seq
chr4:213455425-213455444	213455441	4	4	sense	NGG	TATGCTCAAGTACTGGAAGG	5	RNA2	AD49ZG	RGEN-seq
chr4:213570008-213570027	213570010	29	28	antisense	NAG	TCAGGACAAAGACTGGAAAG	4	RNA2	AD49ZG	RGEN-seq
chr4:216787549-216787568	216787551	45	45	antisense	NGG	GCTGCTGAGAGATTGGATTG	5	RNA2	AD49ZG	RGEN-seq
chr4:218320220-218320239	218320222	308	303	antisense	NGG	TTTCCTGAAAGACTGGATAT	4	RNA2	AD49ZG	RGEN-seq
chr4:219281241-219281260	219281243	5	5	antisense	NGG	TCAGCTGAAAGGCTGCAAAC	4	RNA2	AD49ZG	RGEN-seq
chr4:223465450-223465469	223465466	18	18	sense	NAG	TTTGATAACAGACTGGAAAG	4	RNA2	AD49ZG	RGEN-seq
chr4:223634427-223634446	223634443	24	23	sense	NAG	AATGCTGCAAGACTAGAACG	5	RNA2	AD49ZG	RGEN-seq
chr4:224845591-224845610	224845593	220	219	antisense	NAG	ACCTGTGAAAGACTGGCAAG	5	RNA2	AD49ZG	RGEN-seq
chr4:225541089-225541108	225541091	4	4	antisense	NGG	TGTGCTGAGGGACTGGAATC	5	RNA2	AD49ZG	RGEN-seq
chr4:226949114-226949133	226949130	25	25	sense	NGG	GCTGCTGTGAGACTGGAGAC	5	RNA2	AD49ZG	RGEN-seq
chr4:227616059-227616078	227616075	6	6	sense	NGG	GGTGCTGAAAGACTGGTACC	5	RNA2	AD49ZG	RGEN-seq
chr4:227728158-227728177	227728160	16	16	antisense	NGG	TCTCCAGAGAGACTGAAAGG	5	RNA2	AD49ZG	RGEN-seq
chr5:2141605-2141624	2141621	295	292	sense	NGG	TGGGCAGAAAGACTGGACAA	5	RNA2	AD49ZG	RGEN-seq
chr5:3198505-3198524	3198507	17	16	antisense	NAG	AATGCTGAAACACTACAAAG	5	RNA2	AD49ZG	RGEN-seq
chr5:3344490-3344509	3344506	170	170	sense	NGG	TTTGCTGTAAGATTTGAGAG	5	RNA2	AD49ZG	RGEN-seq
chr5:4233219-4233238	4233221	65	64	antisense	NAG	TTGACTGAAAGAGTGGAAAG	4	RNA2	AD49ZG	RGEN-seq
chr5:5836609-5836628	5836625	27	27	sense	NGG	TCTGCAGAAAGGCTAGACAG	4	RNA2	AD49ZG	RGEN-seq
chr5:6242117-6242136	6242133	54	54	sense	NGG	GATGCTGAGAGCCTGGAAAC	5	RNA2	AD49ZG	RGEN-seq
chr5:6876754-6876773	6876770	4	4	sense	NGG	TATTCTCAAACACTGGAGAG	5	RNA2	AD49ZG	RGEN-seq
chr5:9497855-9497874	9497871	10	10	sense	NGG	TTTGCAGAAAGACTGTAAGT	5	RNA2	AD49ZG	RGEN-seq
chr5:9621516-9621535	9621532	209	208	sense	NAG	TCTTCTGAAAGACTGAAAAT	3	RNA2	AD49ZG	RGEN-seq
chr5:11221907-11221926	11221923	24	24	sense	NGG	TCCTGTGAAAGACAGGACAG	5	RNA2	AD49ZG	RGEN-seq
chr5:13784829-13784848	13784845	60	60	sense	NGG	TTTGCTAAAAGAAGGAAAAG	5	RNA2	AD49ZG	RGEN-seq
chr5:13829077-13829096	13829093	495	493	sense	NGG	GCAGCTGAAATACTAGAAAG	4	RNA2	AD49ZG	RGEN-seq
chr5:13900546-13900565	13900562	264	263	sense	NAG	GATGCAAAAACACTGGAAAG	5	RNA2	AD49ZG	RGEN-seq
chr5:17459932-17459951	17459934	36	36	antisense	NGG	TCATCTGAAAAACAGAAAAG	5	RNA2	AD49ZG	RGEN-seq
chr5:18239559-18239578	18239575	6	6	sense	NGG	TCTACTCAAAAACTGCAAAA	5	RNA2	AD49ZG	RGEN-seq
chr5:18921720-18921739	18921736	5	5	sense	NAG	TTTGCTGTTACACTAGAAAG	5	RNA2	AD49ZG	RGEN-seq
chr5:21123245-21123264	21123247	3	3	antisense	NAG	TTTGGAGAATGACTAGAAAG	5	RNA2	AD49ZG	RGEN-seq
chr5:22650264-22650283	22650280	69	68	sense	NAG	GATGGAGAAAGACTGGCAAG	5	RNA2	AD49ZG	RGEN-seq
chr5:24586644-24586663	24586660	3	3	sense	NGG	ACTGCTGAACCACAGGAAAC	5	RNA2	AD49ZG	RGEN-seq
chr5:28392640-28392659	28392656	18	18	sense	NGG	TCATCAGATAGACTGTAAAG	5	RNA2	AD49ZG	RGEN-seq
chr5:30994512-30994531	30994514	5	5	antisense	NAG	TGTGCAGAAAAACTAGCAAG	5	RNA2	AD49ZG	RGEN-seq
chr5:31064859-31064878	31064875	204	204	sense	NGG	GTTGCTGCAAGGCTGGAAAC	5	RNA2	AD49ZG	RGEN-seq
chr5:31801568-31801587	31801584	14	14	sense	NAG	TCTGGACAAAGACCGGAAAG	4	RNA2	AD49ZG	RGEN-seq
chr5:32713629-32713648	32713645	146	143	sense	NAG	CAGGCTGAAGGACTGGACAG	5	RNA2	AD49ZG	RGEN-seq
chr5:34012719-34012738	34012721	46	46	antisense	NGG	TAAGCTGAACATCTGGAAAG	5	RNA2	AD49ZG	RGEN-seq
chr5:34079356-34079375	34079358	295	292	antisense	NAG	TGCTCTGAAAGAATGGAAAG	4	RNA2	AD49ZG	RGEN-seq
chr5:36684326-36684345	36684342	276	274	sense	NGG	AAAGCTGAAAGACTGGAGAA	5	RNA2	AD49ZG	RGEN-seq
chr5:40591759-40591778	40591761	53	51	antisense	NGG	ACTTCTGAAAGACTGGATGA	5	RNA2	AD49ZG	RGEN-seq
chr5:40991145-40991164	40991161	57	54	sense	NGG	CATGCTGAAAGACAGGAACT	5	RNA2	AD49ZG	RGEN-seq
chr5:42559278-42559297	42559294	476	470	sense	NAG	AATGCTAAAAAACTAGAAAG	5	RNA2	AD49ZG	RGEN-seq
chr5:42802233-42802252	42802249	45	45	sense	NGG	TCAGCTGACAGACAGGAAAC	4	RNA2	AD49ZG	RGEN-seq
chr5:42826339-42826358	42826355	96	95	sense	NGG	TTTGCAGAAAGACTGGGAGT	5	RNA2	AD49ZG	RGEN-seq
chr5:46081479-46081498	46081495	5	5	sense	NGG	TCTGCTGTAAAAATGGAATA	5	RNA2	AD49ZG	RGEN-seq
chr5:46672484-46672503	46672486	12	12	antisense	NGG	TCTTCTGAAAAAGTGGAATG	4	RNA2	AD49ZG	RGEN-seq
chr5:47470441-47470460	47470457	11	11	sense	NAG	GCTGCTGAGAGATTGGAGAG	4	RNA2	AD49ZG	RGEN-seq
chr5:47524956-47524975	47524972	48	47	sense	NGG	TCGGCTGCATGATTGGAAAG	4	RNA2	AD49ZG	RGEN-seq
chr5:47534308-47534327	47534310	407	404	antisense	NGG	TCTGTTGAAAGAATGAAATG	4	RNA2	AD49ZG	RGEN-seq
chr5:51761363-51761382	51761379	3	3	sense	NGG	TCTGCTGTGTCACTGGGAAG	5	RNA2	AD49ZG	RGEN-seq
chr5:55166992-55167011	55166994	3	3	antisense	NGG	ACTTCTTAAAACCTGGAAAG	5	RNA2	AD49ZG	RGEN-seq
chr5:58708243-58708262	58708245	7	6	antisense	NAG	TCTTTTGTGAGACTGGAAAG	4	RNA2	AD49ZG	RGEN-seq
chr5:58858193-58858212	58858209	211	210	sense	NGG	TCTAGTGAAAGAATGAAAAA	5	RNA2	AD49ZG	RGEN-seq
chr5:60057262-60057281	60057264	49	49	antisense	NAG	TTTGCAGACAGACTGGAAGT	5	RNA2	AD49ZG	RGEN-seq
chr5:61199941-61199960	61199943	352	351	antisense	NGG	TCTGCAGAAAGACTTAAAAG	3	RNA2	AD49ZG	RGEN-seq
chr5:65586181-65586200	65586197	562	554	sense	NAG	TAAGCTGATAGACTGGAAAA	4	RNA2	AD49ZG	RGEN-seq
chr5:69281901-69281920	69281917	37	34	sense	NAG	TCTGCTGTTAGACTGGCTAG	4	RNA2	AD49ZG	RGEN-seq
chr5:70494661-70494680	70494663	4	4	antisense	NGG	TCAGCTGAGATACTGAAAAC	5	RNA2	AD49ZG	RGEN-seq
chr5:73434330-73434349	73434346	71	71	sense	NGG	TCTAATGAGAGACAGAAAAG	5	RNA2	AD49ZG	RGEN-seq
chr5:75209538-75209557	75209540	14	14	antisense	NAG	AAAGCTGGAAGACTTGAAAG	5	RNA2	AD49ZG	RGEN-seq
chr5:76869098-76869117	76869114	493	491	sense	NGG	ACTGGTGAAAGACTATAAAA	5	RNA2	AD49ZG	RGEN-seq
chr5:78184537-78184556	78184553	47	46	sense	NGG	GAGGCTGGAAGACTGTAAAG	5	RNA2	AD49ZG	RGEN-seq
chr5:79275661-79275680	79275663	207	206	antisense	NGG	TGCACTGAAAGCCTGGAAAC	5	RNA2	AD49ZG	RGEN-seq
chr5:80311439-80311458	80311441	6	6	antisense	NAG	ACTGGTGGAGGACTGGAAAG	4	RNA2	AD49ZG	RGEN-seq
chr5:82147488-82147507	82147504	116	114	sense	NGG	ACTGCTTACTAACTGGAAAG	5	RNA2	AD49ZG	RGEN-seq
chr5:84433691-84433710	84433707	39	39	sense	NAG	ACTCTTAAAAGACTAGAAAG	5	RNA2	AD49ZG	RGEN-seq
chr5:88976634-88976653	88976650	5	5	sense	NGG	TATCCTGAAAGTCTAGAATG	5	RNA2	AD49ZG	RGEN-seq
chr5:93443118-93443137	93443134	47	44	sense	NGG	AGTGCTGAAAGACATGAAAT	5	RNA2	AD49ZG	RGEN-seq
chr5:96817066-96817085	96817082	514	510	sense	NGG	ATTACTGAAAGCCTGGAAAG	4	RNA2	AD49ZG	RGEN-seq
chr5:97703581-97703600	97703583	4	4	antisense	NAG	TGTGCAGAAAGCCTGGAGAG	4	RNA2	AD49ZG	RGEN-seq
chr5:99309265-99309284	99309267	31	31	antisense	NGG	TCTTCAGAAAGAATGAAAAT	5	RNA2	AD49ZG	RGEN-seq
chr5:100351145-100351164	100351147	243	242	antisense	NAG	TTAAATGAAAGATTGGAAAG	5	RNA2	AD49ZG	RGEN-seq
chr5:101397037-101397056	101397053	7	7	sense	NAG	GTTGCTACAAGACTCGAAAG	5	RNA2	AD49ZG	RGEN-seq
chr5:101607465-101607484	101607467	338	333	antisense	NGG	ACTGCATATAGACTGGAAAT	5	RNA2	AD49ZG	RGEN-seq
chr5:106744747-106744766	106744763	17	17	sense	NAG	CCTGAAGAAAGGATGGAAAG	5	RNA2	AD49ZG	RGEN-seq
chr5:107817011-107817030	107817027	9	9	sense	NAG	GCTGCCAAAAGGCTGGATAG	5	RNA2	AD49ZG	RGEN-seq
chr5:110292631-110292650	110292633	3	3	antisense	NAG	TCTCCTAAGAGATTGGATAG	5	RNA2	AD49ZG	RGEN-seq
chr5:111152750-111152769	111152766	17	17	sense	NAG	TCTCTTAAAAGACTGGGAAG	4	RNA2	AD49ZG	RGEN-seq
chr5:111701409-111701428	111701425	4	4	sense	NGG	TTTGCTTAAAAAATGGAAAT	5	RNA2	AD49ZG	RGEN-seq
chr5:113101283-113101302	113101285	289	288	antisense	NGG	GCAGATGAAAGACAGGAGAG	5	RNA2	AD49ZG	RGEN-seq
chr5:120549342-120549361	120549344	39	39	antisense	NGG	TGTTCTGAAAGATTTAAAAG	5	RNA2	AD49ZG	RGEN-seq
chr5:122313298-122313317	122313300	3	3	antisense	NAG	ACTGGGACAAGACTGGAAAG	5	RNA2	AD49ZG	RGEN-seq
chr5:122670079-122670098	122670081	11	11	antisense	NAG	ACTGCAGAAAGCAAGGAAAG	5	RNA2	AD49ZG	RGEN-seq
chr5:127070372-127070391	127070374	467	464	antisense	NAG	TCTACAGAAACACTGGAAAA	4	RNA2	AD49ZG	RGEN-seq
chr5:131642117-131642136	131642119	534	534	antisense	NGG	GCAGCTGAAAGACTGGGAAA	4	RNA2	AD49ZG	RGEN-seq
chr5:131730675-131730694	131730677	11	11	antisense	NGG	TCTGCAGACAAACTGGACAA	5	RNA2	AD49ZG	RGEN-seq
chr5:132323108-132323127	132323124	46	45	sense	NGG	TCTACAGAAAGACTGTAGTG	5	RNA2	AD49ZG	RGEN-seq
chr5:139005603-139005622	139005605	293	286	antisense	NAG	TAGTATGAAAGACTTGAAAG	5	RNA2	AD49ZG	RGEN-seq
chr5:141866936-141866955	141866938	8	8	antisense	NGG	ACTCCAGAATTACTGGAAAG	5	RNA2	AD49ZG	RGEN-seq
chr5:145747667-145747686	145747669	19	19	antisense	NGG	TAGGTTGAAAACCTGGAAAG	5	RNA2	AD49ZG	RGEN-seq
chr5:147761850-147761869	147761852	27	27	antisense	NGG	TCTAGTGAGAGACAGAAAAG	5	RNA2	AD49ZG	RGEN-seq
chr5:150232330-150232349	150232346	26	26	sense	NGG	TCGGGTGAAAGACTGACCAG	5	RNA2	AD49ZG	RGEN-seq
chr5:151328244-151328263	151328260	137	110	sense	NAG	GAAGATGAAAGAATGGAAAG	5	RNA2	AD49ZG	RGEN-seq
chr5:151443834-151443853	151443836	431	428	antisense	NAG	TCACCAGAAAGACTAGAAAG	4	RNA2	AD49ZG	RGEN-seq
chr5:152182765-152182784	152182781	70	69	sense	NGG	TCTGCCAAAAGTCTATAAAG	5	RNA2	AD49ZG	RGEN-seq
chr5:153022773-153022792	153022775	4	4	antisense	NGG	TCTGATGAAAGCCTGGCATG	4	RNA2	AD49ZG	RGEN-seq
chr5:155971734-155971753	155971750	3	3	sense	NAG	TGTGGAGAAAGACTAGAGAG	5	RNA2	AD49ZG	RGEN-seq
chr5:156242157-156242176	156242173	24	22	sense	NGG	TGTCAAGAAAGAGTGGAAAG	5	RNA2	AD49ZG	RGEN-seq
chr5:158502173-158502192	158502175	4	4	antisense	NGG	TCAGCTCACAGACTGGGAAA	5	RNA2	AD49ZG	RGEN-seq
chr5:164276826-164276845	164276828	244	241	antisense	NAG	CCAGCTGAGAGACTGGCAAA	5	RNA2	AD49ZG	RGEN-seq
chr5:165707263-165707282	165707279	4	4	sense	NAG	CATGCTCAAAGGCTGGAGAG	5	RNA2	AD49ZG	RGEN-seq
chr5:166972356-166972375	166972358	58	58	antisense	NAG	TCTAATGAGAGACAGGAAAG	4	RNA2	AD49ZG	RGEN-seq
chr5:167131111-167131130	167131113	7	7	antisense	NAG	GGTGCTGGAATACTGGAATG	5	RNA2	AD49ZG	RGEN-seq
chr5:168359077-168359096	168359093	11	7	sense	NGG	TCTCTTGAGAGACTGGGAAA	5	RNA2	AD49ZG	RGEN-seq
chr5:168396558-168396577	168396574	69	67	sense	NGG	TCTGATCAAAGAATGGAAAT	4	RNA2	AD49ZG	RGEN-seq
chr5:168669361-168669380	168669377	18	18	sense	NGG	CCTGCTGAAAGAAAAGTAAG	5	RNA2	AD49ZG	RGEN-seq
chr5:170456141-170456160	170456143	216	214	antisense	NGG	TCCTCTGAGAGACTGGAGAG	4	RNA2	AD49ZG	RGEN-seq
chr5:173493393-173493412	173493395	25	25	antisense	NGG	TCTGCTGATAGACTGATCTG	5	RNA2	AD49ZG	RGEN-seq
chr5:173624367-173624386	173624369	32	31	antisense	NGG	CCTGCAGAAAGAGAGGAGAG	5	RNA2	AD49ZG	RGEN-seq
chr5:173749382-173749401	173749384	7	7	antisense	NGG	TCTGCTTATAGACTAGAGAA	5	RNA2	AD49ZG	RGEN-seq
chr5:178844542-178844561	178844558	5	5	sense	NAG	TCTCCTGAAACACTGGATTG	4	RNA2	AD49ZG	RGEN-seq
chr5:179154537-179154556	179154553	9	9	sense	NAG	TATTCTTAAAGATTAGAAAG	5	RNA2	AD49ZG	RGEN-seq
chr5:180375547-180375566	180375563	5	5	sense	NGG	TCTGAGGAGAGACAGGAATG	5	RNA2	AD49ZG	RGEN-seq
chr5:182328064-182328083	182328080	25	24	sense	NAG	TTTTCTGAAAGGCTAGAAAG	4	RNA2	AD49ZG	RGEN-seq
chr5:183154025-183154044	183154027	15	15	antisense	NAG	TGTGCCAAATGACTGAAAAG	5	RNA2	AD49ZG	RGEN-seq
chr5:183667294-183667313	183667296	3	3	antisense	NGG	TCTGGAGAGAGAATGGACAG	5	RNA2	AD49ZG	RGEN-seq
chr5:183800174-183800193	183800176	24	24	antisense	NGG	CCTGCAGGAAGACAGGAAGG	5	RNA2	AD49ZG	RGEN-seq
chr5:183811983-183812002	183811985	241	241	antisense	NGG	CCAGCTGAAAGGCTGGTGAG	5	RNA2	AD49ZG	RGEN-seq
chr5:186348214-186348233	186348216	8	8	antisense	NGG	GTTGCTGAAAGGCTGCAAAA	5	RNA2	AD49ZG	RGEN-seq
chr5:187292284-187292303	187292286	429	422	antisense	NAG	TCTACCTAAAGACAGGAAAG	4	RNA2	AD49ZG	RGEN-seq
chr5:189738778-189738797	189738780	4	4	antisense	NAG	GTGGCTGAAATACTGGAAGG	5	RNA2	AD49ZG	RGEN-seq
chr5:191228068-191228087	191228084	308	306	sense	NAG	TACACTGACAGACTGGAAAA	5	RNA2	AD49ZG	RGEN-seq
chr5:192635673-192635692	192635675	8	8	antisense	NGG	TGTGCATAAGGACTGGAAAT	5	RNA2	AD49ZG	RGEN-seq
chr5:194101307-194101326	194101309	28	28	antisense	NAG	TCTTCGGAAAGACTTGAAAG	3	RNA2	AD49ZG	RGEN-seq
chr5:194708898-194708917	194708900	10	10	antisense	NAG	TACACTGAAAGATTGGAGAG	5	RNA2	AD49ZG	RGEN-seq
chr5:194785959-194785978	194785961	60	59	antisense	NGG	TCTGCAGAATAACTGGGAAA	5	RNA2	AD49ZG	RGEN-seq
chr5:195331859-195331878	195331875	6	5	sense	NGG	ACTAATGACACACTGGAAAG	5	RNA2	AD49ZG	RGEN-seq
chr5:195797277-195797296	195797293	164	164	sense	NGG	TCTAATGAGAGACAGAAAAG	5	RNA2	AD49ZG	RGEN-seq
chr5:198012382-198012401	198012398	150	143	sense	NGG	TCTGCTAATAGACTATAAAA	5	RNA2	AD49ZG	RGEN-seq
chr5:200670858-200670877	200670860	9	8	antisense	NGG	ACAGCTGAAAGCCAGGAGAG	5	RNA2	AD49ZG	RGEN-seq
chr5:201771261-201771280	201771277	11	11	sense	NGG	GCTCCTAACAGACTGTAAAG	5	RNA2	AD49ZG	RGEN-seq
chr5:202851085-202851104	202851087	102	101	antisense	NGG	GCTGCCCAATGACTAGAAAG	5	RNA2	AD49ZG	RGEN-seq
chr5:203124990-203125009	203124992	27	27	antisense	NGG	TCTAGTGAAAGAAAGGAAAT	5	RNA2	AD49ZG	RGEN-seq
chr5:203126089-203126108	203126091	98	98	antisense	NGG	TCTAATGAGAGACAGAAAAG	5	RNA2	AD49ZG	RGEN-seq
chr5:206343093-206343112	206343095	31	31	antisense	NGG	TCTGCTGGAAGAATAAAAAG	4	RNA2	AD49ZG	RGEN-seq
chr5:207484504-207484523	207484506	7	7	antisense	NAG	TGTGCTGACAGACAGGAAAT	4	RNA2	AD49ZG	RGEN-seq
chr5:208500069-208500088	208500085	31	31	sense	NAG	ACAGCAAAAACACTGGAAAG	5	RNA2	AD49ZG	RGEN-seq
chr5:210468512-210468531	210468514	13	13	antisense	NAG	TCTAATGAAAGATAGAAAAG	5	RNA2	AD49ZG	RGEN-seq
chr5:214868277-214868296	214868279	289	283	antisense	NGG	AATGCTGAAAGACCAGAGAG	5	RNA2	AD49ZG	RGEN-seq
chr5:215475971-215475990	215475973	455	451	antisense	NAG	GTTGTTAAAAGACTGAAAAG	5	RNA2	AD49ZG	RGEN-seq
chr6:1555767-1555786	1555783	5	5	sense	NAG	TATACTGTAAGACTGAAAAC	5	RNA2	AD49ZG	RGEN-seq
chr6:1775404-1775423	1775406	234	232	antisense	NGG	CCTGAGGAAAGACTTGAATG	5	RNA2	AD49ZG	RGEN-seq
chr6:6854515-6854534	6854517	33	33	antisense	NAG	GCTGCAGACAAACTGAAAAG	5	RNA2	AD49ZG	RGEN-seq
chr6:7153846-7153865	7153848	81	81	antisense	NAG	TCTTATGAAAAACTAAAAAG	5	RNA2	AD49ZG	RGEN-seq
chr6:7556627-7556646	7556629	51	51	antisense	NGG	ACAGCTGATAAACTGTAAAG	5	RNA2	AD49ZG	RGEN-seq
chr6:8384372-8384391	8384388	411	409	sense	NGG	CATGCTCAAAGCATGGAAAG	5	RNA2	AD49ZG	RGEN-seq
chr6:8415417-8415436	8415433	22	22	sense	NAG	TTAGCTGAAGTAATGGAAAG	5	RNA2	AD49ZG	RGEN-seq
chr6:12545526-12545545	12545528	43	43	antisense	NGG	TTTGTGGAAAGACAAGAAAG	5	RNA2	AD49ZG	RGEN-seq
chr6:12661248-12661267	12661264	14	14	sense	NGG	TCAACTGAATGACAGGAATG	5	RNA2	AD49ZG	RGEN-seq
chr6:12822804-12822823	12822820	22	22	sense	NGG	TCTGATGAAATACTAAAAAT	5	RNA2	AD49ZG	RGEN-seq
chr6:13117960-13117979	13117962	111	109	antisense	NGG	ATTTCTTAAAGACTGGAAAC	5	RNA2	AD49ZG	RGEN-seq
chr6:13411883-13411902	13411885	87	86	antisense	NGG	TAAGGTAAAAGAATGGAAAG	5	RNA2	AD49ZG	RGEN-seq
chr6:14612723-14612742	14612725	500	498	antisense	NAG	TCCATTGAAAGACTGGAATG	4	RNA2	AD49ZG	RGEN-seq
chr6:14954133-14954152	14954135	86	86	antisense	NGG	GCAGCTGACAGACTGGGAAA	5	RNA2	AD49ZG	RGEN-seq
chr6:15210325-15210344	15210341	35	35	sense	NAG	TCTGAAGAAACACTGAAAAA	5	RNA2	AD49ZG	RGEN-seq
chr6:21048199-21048218	21048201	343	341	antisense	NAG	TTTCCTGTAAGACTGGAAAG	3	RNA2	AD49ZG	RGEN-seq
chr6:22038732-22038751	22038748	42	41	sense	NGG	TCTACTGACTGACTAGAGAG	5	RNA2	AD49ZG	RGEN-seq
chr6:23787892-23787911	23787908	101	101	sense	NAG	TCTTCTAGAAAACTGAAAAG	5	RNA2	AD49ZG	RGEN-seq
chr6:26563918-26563937	26563920	49	49	antisense	NGG	CCTGCTGAAAGCCAGAAAAA	5	RNA2	AD49ZG	RGEN-seq
chr6:26971684-26971703	26971700	4	4	sense	NAG	GCTGCTGATGTATTGGAAAG	5	RNA2	AD49ZG	RGEN-seq
chr6:27989000-27989019	27989016	31	31	sense	NAG	ACTGCTGAGAGAATGGAAAT	4	RNA2	AD49ZG	RGEN-seq
chr6:28039056-28039075	28039072	16	16	sense	NGG	ACTGCAGAAGGACAGGAATG	5	RNA2	AD49ZG	RGEN-seq
chr6:28946560-28946579	28946562	8	8	antisense	NGG	TTTGCTGTAATAATGGAGAG	5	RNA2	AD49ZG	RGEN-seq
chr6:30729155-30729174	30729171	98	97	sense	NGG	GATGCTGATAGACTTGAAAT	5	RNA2	AD49ZG	RGEN-seq
chr6:32140952-32140971	32140968	499	496	sense	NGG	CAGGCAGAAAGAATGGAAAG	5	RNA2	AD49ZG	RGEN-seq
chr6:34663410-34663429	34663412	69	68	antisense	NAG	TATTCTGCAAGACTGAAAAG	4	RNA2	AD49ZG	RGEN-seq
chr6:35173946-35173965	35173962	170	170	sense	NGG	TTTGCTCAAAGAATGGACAG	4	RNA2	AD49ZG	RGEN-seq
chr6:35525360-35525379	35525362	48	44	antisense	NGG	TCTAATGAAAGACAGAAAGG	5	RNA2	AD49ZG	RGEN-seq
chr6:35789053-35789072	35789069	331	329	sense	NGG	ATTGATGAAAGACAGGGAAG	5	RNA2	AD49ZG	RGEN-seq
chr6:37684858-37684877	37684860	11	11	antisense	NAG	TATCTTCTAAGACTGGAAAG	5	RNA2	AD49ZG	RGEN-seq
chr6:38597623-38597642	38597639	11	11	sense	NGG	TGTGCTGAAACACTGAACAC	5	RNA2	AD49ZG	RGEN-seq
chr6:39156756-39156775	39156772	65	65	sense	NAG	ACTAGTGAAAGACTGACAAG	5	RNA2	AD49ZG	RGEN-seq
chr6:39699032-39699051	39699048	75	74	sense	NGG	TGTTCTGGAAGACTGGACTG	5	RNA2	AD49ZG	RGEN-seq
chr6:40942161-40942180	40942163	525	517	antisense	NGG	TAAACTGAAAGACAGGAAAG	4	RNA2	AD49ZG	RGEN-seq
chr6:42568034-42568053	42568050	6	6	sense	NGG	TGATCTGTAAGACAGGAAAG	5	RNA2	AD49ZG	RGEN-seq
chr6:43140035-43140054	43140037	677	675	antisense	NAG	GTTGCAGAAAGACTGGTAAG	4	RNA2	AD49ZG	RGEN-seq
chr6:43615075-43615094	43615091	115	114	sense	NGG	TCTGCTAACAGACTGGAAGC	4	RNA2	AD49ZG	RGEN-seq
chr6:43853692-43853711	43853708	222	220	sense	NAG	TGGGAGGAAAGACTGGAATG	5	RNA2	AD49ZG	RGEN-seq
chr6:44601291-44601310	44601293	442	441	antisense	NGG	CCTGGGGAAAGACTGACAAG	5	RNA2	AD49ZG	RGEN-seq
chr6:44641521-44641540	44641523	3	3	antisense	NAG	TCTAATGAAAGACTTGTATG	5	RNA2	AD49ZG	RGEN-seq
chr6:47350035-47350054	47350037	339	337	antisense	NAG	AGAGCTGCAAGATTGGAAAG	5	RNA2	AD49ZG	RGEN-seq
chr6:51094912-51094931	51094928	3	3	sense	NAG	GCTGCTCAGAGCCTGAAAAG	5	RNA2	AD49ZG	RGEN-seq
chr6:52397324-52397343	52397326	335	332	antisense	NGG	TCTGTTTTAAAACTGGAAAT	5	RNA2	AD49ZG	RGEN-seq
chr6:52759011-52759030	52759027	564	559	sense	NGG	GCTAGAGAAAGACTGGAAAA	5	RNA2	AD49ZG	RGEN-seq
chr6:53828432-53828451	53828434	426	425	antisense	NGG	GCAGCTGAAAAACAAGAAAG	5	RNA2	AD49ZG	RGEN-seq
chr6:54173409-54173428	54173411	15	15	antisense	NAG	TATACTGAAAAACAGAAAAG	5	RNA2	AD49ZG	RGEN-seq
chr6:56837650-56837669	56837666	4	4	sense	NGG	TTTGTTAAATGACTGTAAAG	5	RNA2	AD49ZG	RGEN-seq
chr6:57537732-57537751	57537748	320	316	sense	NGG	GCTGCTGAGAGACTGGATTG	4	RNA2	AD49ZG	RGEN-seq
chr6:58366490-58366509	58366492	152	151	antisense	NGG	TCTACTAAAACACTGGACAA	5	RNA2	AD49ZG	RGEN-seq
chr6:59932473-59932492	59932489	14	14	sense	NAG	GGTGGAGAAAGACAGGAAAG	5	RNA2	AD49ZG	RGEN-seq
chr6:60336983-60337002	60336985	32	32	antisense	NGG	TCTGTTTAAAAAATGAAAAG	5	RNA2	AD49ZG	RGEN-seq
chr6:60433676-60433695	60433678	9	7	antisense	NGG	CCACCTGAGAGACGGGAAAG	5	RNA2	AD49ZG	RGEN-seq
chr6:62178366-62178385	62178382	192	191	sense	NGG	TCTATTTAAAGACTGGGAAT	5	RNA2	AD49ZG	RGEN-seq
chr6:62439880-62439899	62439896	657	653	sense	NGG	CATGCTGAAATACTGAAATG	5	RNA2	AD49ZG	RGEN-seq
chr6:63199929-63199948	63199945	16	15	sense	NGG	TCTGTTGAAAGACTAGGAGA	5	RNA2	AD49ZG	RGEN-seq
chr6:64523724-64523743	64523740	267	267	sense	NGG	TTTACTGAAAACATGGAAAG	5	RNA2	AD49ZG	RGEN-seq
chr6:66635037-66635056	66635039	4	4	antisense	NGG	TTCTCTGAAAGACAGTAAAG	5	RNA2	AD49ZG	RGEN-seq
chr6:69103899-69103918	69103901	11	11	antisense	NAG	TCTCCTCCAAGACTGGATAG	4	RNA2	AD49ZG	RGEN-seq
chr6:72374792-72374811	72374794	26	26	antisense	NAG	TCTGGAAAGAGATTGGAAAG	5	RNA2	AD49ZG	RGEN-seq
chr6:74539972-74539991	74539988	12	12	sense	NAG	ACAGCTGAAAGATTACAAAG	5	RNA2	AD49ZG	RGEN-seq
chr6:74886464-74886483	74886466	18	18	antisense	NGG	TCTGCTCAGCAATTGGAAAG	5	RNA2	AD49ZG	RGEN-seq
chr6:78151461-78151480	78151477	3	3	sense	NAG	TCAGTTTAAATACTGGAAAG	4	RNA2	AD49ZG	RGEN-seq
chr6:79866671-79866690	79866687	10	10	sense	NAG	ACTTCTGAGTGACTGAAAAG	5	RNA2	AD49ZG	RGEN-seq
chr6:80021656-80021675	80021658	547	545	antisense	NGG	TAGGCTGGAAAACTGGCAAG	5	RNA2	AD49ZG	RGEN-seq
chr6:80697351-80697370	80697367	129	105	sense	NAG	TTGGCTGAAGGACTGGATAT	5	RNA2	AD49ZG	RGEN-seq
chr6:81126957-81126976	81126973	142	142	sense	NAG	TCAGCTGATAGATTGGTAAG	4	RNA2	AD49ZG	RGEN-seq
chr6:84096036-84096055	84096052	456	456	sense	NGG	CATGCAGAAAGACTGGAGAG	4	RNA2	AD49ZG	RGEN-seq
chr6:84616108-84616127	84616124	167	167	sense	NGG	TCTGCTCTGAGACTGGGAAG	4	RNA2	AD49ZG	RGEN-seq
chr6:85031092-85031111	85031108	7	7	sense	NGG	TGTGTTCTAAGACTGGACAG	5	RNA2	AD49ZG	RGEN-seq
chr6:85274959-85274978	85274975	9	9	sense	NAG	GCATCTGGAAGAATGGAAAG	5	RNA2	AD49ZG	RGEN-seq
chr6:88568486-88568505	88568488	109	108	antisense	NAG	CCTCCTGAAAGCATGGAAAG	4	RNA2	AD49ZG	RGEN-seq
chr6:88651934-88651953	88651950	222	219	sense	NGG	TAAATAGAAAGACTGGAAAG	5	RNA2	AD49ZG	RGEN-seq
chr6:89281365-89281384	89281381	166	164	sense	NGG	GCTACTAAAAGACTGGGGAG	5	RNA2	AD49ZG	RGEN-seq
chr6:89579472-89579491	89579488	8	8	sense	NGG	TATACTACAAGCCTGGAAAG	5	RNA2	AD49ZG	RGEN-seq
chr6:92076866-92076885	92076882	35	35	sense	NGG	TCTAATGAAAGACAGAAAGG	5	RNA2	AD49ZG	RGEN-seq
chr6:92357325-92357344	92357341	345	345	sense	NGG	TATACTAAAAGACTGGGGAG	5	RNA2	AD49ZG	RGEN-seq
chr6:94373559-94373578	94373575	504	501	sense	NGG	ACTTCTGGAAGACTGGAAAC	4	RNA2	AD49ZG	RGEN-seq
chr6:100126569-100126588	100126585	107	107	sense	NGG	GCTGCTAAGAGCATGGAAAG	5	RNA2	AD49ZG	RGEN-seq
chr6:100719192-100719211	100719208	4	4	sense	NGG	TCTGCTCACCCATTGGAAAG	5	RNA2	AD49ZG	RGEN-seq
chr6:102107218-102107237	102107234	180	178	sense	NGG	CCTACTGAAAAAGAGGAAAG	5	RNA2	AD49ZG	RGEN-seq
chr6:104267593-104267612	104267609	239	232	sense	NAG	AATAAGGAAAGACTGGAAAG	5	RNA2	AD49ZG	RGEN-seq
chr6:108401481-108401500	108401497	6	6	sense	NGG	TATACTGAAAGACAGGCAAA	5	RNA2	AD49ZG	RGEN-seq
chr6:110356262-110356281	110356264	451	445	antisense	NGG	GGAGCTGGAAGACTGGAAGG	5	RNA2	AD49ZG	RGEN-seq
chr6:114768030-114768049	114768032	492	490	antisense	NGG	CCTACTGGAAAACTGGAAAT	5	RNA2	AD49ZG	RGEN-seq
chr6:114935509-114935528	114935525	96	95	sense	NGG	TGGGCTGGAAGACTGGAAGA	5	RNA2	AD49ZG	RGEN-seq
chr6:115871493-115871512	115871495	13	13	antisense	NGG	GCTCCTGAAGGACTGACAAG	5	RNA2	AD49ZG	RGEN-seq
chr6:123288882-123288901	123288898	209	209	sense	NGG	TCTTCAAAAAAACTGGAAGG	5	RNA2	AD49ZG	RGEN-seq
chr6:124389857-124389876	124389859	18	18	antisense	NAG	GAGGCTCCAAGACTGGAAAG	5	RNA2	AD49ZG	RGEN-seq
chr6:126769974-126769993	126769990	50	49	sense	NGG	TTAGCTCAAGAACTGGAAAG	5	RNA2	AD49ZG	RGEN-seq
chr6:129128213-129128232	129128215	84	83	antisense	NGG	ACTGTTGAAAGCCTAGAATG	5	RNA2	AD49ZG	RGEN-seq
chr6:129215762-129215781	129215778	24	17	sense	NAG	TCTTTTGGAAGACAGGAAAG	4	RNA2	AD49ZG	RGEN-seq
chr6:131551388-131551407	131551404	9	9	sense	NAG	TCTGGGGAAAGACTGGGTAG	4	RNA2	AD49ZG	RGEN-seq
chr6:132987791-132987810	132987807	20	20	sense	NGG	TTTTCTGAATGACTAGAAAA	5	RNA2	AD49ZG	RGEN-seq
chr6:134833328-134833347	134833344	6	6	sense	NGG	GCTTCTGAAAGGCCAGAAAG	5	RNA2	AD49ZG	RGEN-seq
chr6:134913749-134913768	134913751	444	441	antisense	NGG	TCTCCTGAAAGACAGGAAAG	2	RNA2	AD49ZG	RGEN-seq
chr6:135126144-135126163	135126160	37	30	sense	NAG	CCACCTGAAAAAATGGAAAG	5	RNA2	AD49ZG	RGEN-seq
chr6:137403723-137403742	137403739	15	15	sense	NGG	GCTGCTGGAAGCATGGAGAG	5	RNA2	AD49ZG	RGEN-seq
chr6:138164946-138164965	138164948	42	42	antisense	NGG	GATGCTGAAGGTTTGGAAAG	5	RNA2	AD49ZG	RGEN-seq
chr6:138436832-138436851	138436848	14	14	sense	NGG	TCTGCTTAAAGAATGGCAAA	4	RNA2	AD49ZG	RGEN-seq
chr6:139241586-139241605	139241602	61	61	sense	NGG	TCTGCTCAAAACCTGAAAAG	4	RNA2	AD49ZG	RGEN-seq
chr6:139280364-139280383	139280366	33	33	antisense	NGG	TCTGGTGAAAGAGAGGAAAT	4	RNA2	AD49ZG	RGEN-seq
chr6:140910625-140910644	140910641	4	4	sense	NGG	TCTTCTGCATGACTGAAAAC	5	RNA2	AD49ZG	RGEN-seq
chr6:141321399-141321418	141321401	169	169	antisense	NGG	TATGCAGAAAGACTGGCAGG	4	RNA2	AD49ZG	RGEN-seq
chr6:141336829-141336848	141336845	25	25	sense	NGG	TGTGGTGAAATACTGATAAG	5	RNA2	AD49ZG	RGEN-seq
chr6:141442162-141442181	141442178	140	138	sense	NGG	TCTGGTCAAATACTGGAAAT	4	RNA2	AD49ZG	RGEN-seq
chr6:142760327-142760346	142760343	8	8	sense	NAG	ACTGTGGACAGACTGAAAAG	5	RNA2	AD49ZG	RGEN-seq
chr6:143104784-143104803	143104786	317	315	antisense	NGG	CCTGTTGAATAATTGGAAAG	5	RNA2	AD49ZG	RGEN-seq
chr6:144309446-144309465	144309462	26	26	sense	NGG	TCTGCCCAAACACAGGAAAG	4	RNA2	AD49ZG	RGEN-seq
chr6:144648422-144648441	144648424	4	4	antisense	NAG	TCTAATGAGAGACAGAAAAG	5	RNA2	AD49ZG	RGEN-seq
chr6:145477920-145477939	145477936	6	6	sense	NGG	TCTACTGAGTGACTTGAATG	5	RNA2	AD49ZG	RGEN-seq
chr6:148255877-148255896	148255893	5	5	sense	NGG	ACTGCAGAAAGCCTGGAATC	5	RNA2	AD49ZG	RGEN-seq
chr6:149268463-149268482	149268479	146	146	sense	NGG	ACTGTTGAATGAATGAAAAG	5	RNA2	AD49ZG	RGEN-seq
chr6:153880311-153880330	153880327	37	12	sense	NGG	TGTCCTGAAAGACTGTAACA	5	RNA2	AD49ZG	RGEN-seq
chr6:154199853-154199872	154199855	195	195	antisense	NGG	GCTGCTGATGGAATGGAAAG	4	RNA2	AD49ZG	RGEN-seq
chr6:154533267-154533286	154533269	230	227	antisense	NAG	GTTGCTGGTAGACTGGAAAT	5	RNA2	AD49ZG	RGEN-seq
chr7:530253-530272	530269	8	8	sense	NGG	ACTGCTGAATCATTGGAATG	5	RNA2	AD49ZG	RGEN-seq
chr7:4038442-4038461	4038458	8	8	sense	NGG	TGTGCTGAGGGACTGGTGAG	5	RNA2	AD49ZG	RGEN-seq
chr7:4046885-4046904	4046887	171	169	antisense	NAG	TCAGATGAAAGACTGAAGAG	4	RNA2	AD49ZG	RGEN-seq
chr7:5519993-5520012	5519995	478	473	antisense	NGG	TCTGCTGAAGAACTGAAAAC	4	RNA2	AD49ZG	RGEN-seq
chr7:10090835-10090854	10090851	3	3	sense	NAG	TCTAATGAGAGACAGAAAAG	5	RNA2	AD49ZG	RGEN-seq
chr7:11513996-11514015	11514012	15	14	sense	NGG	TTTGGAGAGAGACTGGAAAC	5	RNA2	AD49ZG	RGEN-seq
chr7:12238965-12238984	12238967	196	196	antisense	NGG	TAAGCAGAAAGGCTGGACAG	5	RNA2	AD49ZG	RGEN-seq
chr7:13487536-13487555	13487552	205	205	sense	NGG	GATGGAGAAAGACGGGAAAG	5	RNA2	AD49ZG	RGEN-seq
chr7:15045130-15045149	15045146	3	3	sense	NAG	TCTTCTGAACAACTAGAATG	5	RNA2	AD49ZG	RGEN-seq
chr7:15786084-15786103	15786100	19	19	sense	NGG	TTTTCAGAAAGACTGGAGAA	5	RNA2	AD49ZG	RGEN-seq
chr7:17590339-17590358	17590341	7	7	antisense	NGG	TGTTCTTAAAGAATGGAAAA	5	RNA2	AD49ZG	RGEN-seq
chr7:18412014-18412033	18412016	24	24	antisense	NGG	TCTGCTGTGAGACAGGAGAG	4	RNA2	AD49ZG	RGEN-seq
chr7:20553250-20553269	20553266	414	413	sense	NGG	CCTGTTGAAGAACTGAAAAG	5	RNA2	AD49ZG	RGEN-seq
chr7:20652166-20652185	20652182	9	9	sense	NGG	TCTGTCCAAGGGCTGGAAAG	5	RNA2	AD49ZG	RGEN-seq
chr7:21082691-21082710	21082707	68	68	sense	NGG	TCTGCTGAGGGACTGGTAAT	4	RNA2	AD49ZG	RGEN-seq
chr7:21535422-21535441	21535438	8	7	sense	NAG	TCTGCTTGGACACTGGAAAG	4	RNA2	AD49ZG	RGEN-seq
chr7:23943231-23943250	23943247	139	137	sense	NGG	TATTCTGGAAGACTGGACAA	5	RNA2	AD49ZG	RGEN-seq
chr7:26739358-26739377	26739374	70	69	sense	NGG	GGTGGTGAAAGAAAGGAAAG	5	RNA2	AD49ZG	RGEN-seq
chr7:28801905-28801924	28801907	80	80	antisense	NGG	GCTTCTGAGAGACTGGTGAG	5	RNA2	AD49ZG	RGEN-seq
chr7:30367092-30367111	30367094	11	11	antisense	NAG	TCTACTAAATTACTGGAAAT	5	RNA2	AD49ZG	RGEN-seq
chr7:30557476-30557495	30557492	67	67	sense	NGG	CCTGCTGTGAGATAGGAAAG	5	RNA2	AD49ZG	RGEN-seq
chr7:32298966-32298985	32298968	365	360	antisense	NGG	TATTGTGAAAGTCTGGAAAG	4	RNA2	AD49ZG	RGEN-seq
chr7:34354290-34354309	34354292	3	3	antisense	NGG	CCTGCTGAAAGTGCAGAAAG	5	RNA2	AD49ZG	RGEN-seq
chr7:36741450-36741469	36741466	3	3	sense	NAG	TCTCTTCAGAGACTGGAAAA	5	RNA2	AD49ZG	RGEN-seq
chr7:37525858-37525877	37525874	74	73	sense	NGG	TCAGCTTAAATGCTGGAAAG	4	RNA2	AD49ZG	RGEN-seq
chr7:38406039-38406058	38406041	422	419	antisense	NGG	TCTGCCTAAAGACAGGAAAG	3	RNA2	AD49ZG	RGEN-seq
chr7:38896644-38896663	38896660	472	471	sense	NGG	TCTTCAGAAACACTGGAAAT	4	RNA2	AD49ZG	RGEN-seq
chr7:43559002-43559021	43559004	61	56	antisense	NAG	ATTGTGGAAAGACTGGATAG	5	RNA2	AD49ZG	RGEN-seq
chr7:46993376-46993395	46993378	20	20	antisense	NGG	GCTCCTGAAAAACTACAAAG	5	RNA2	AD49ZG	RGEN-seq
chr7:47044845-47044864	47044847	32	32	antisense	NGG	CATGCTGCAAGTCTGGAAGG	5	RNA2	AD49ZG	RGEN-seq
chr7:47542197-47542216	47542199	369	367	antisense	NGG	TTTGCTGGAAAACTAGAAAG	4	RNA2	AD49ZG	RGEN-seq
chr7:47757030-47757049	47757032	4	4	antisense	NGG	TCTGGTGAGTGATTAGAAAG	5	RNA2	AD49ZG	RGEN-seq
chr7:48683743-48683762	48683759	115	115	sense	NGG	TCTGGTGAAAGAATGGGAAG	3	RNA2	AD49ZG	RGEN-seq
chr7:48968341-48968360	48968343	3	3	antisense	NGG	TTTGTTGAAAAACAGGATAG	5	RNA2	AD49ZG	RGEN-seq
chr7:49507094-49507113	49507110	36	35	sense	NGG	TGTGCTGAAAGACTTAAAGG	4	RNA2	AD49ZG	RGEN-seq
chr7:50762475-50762494	50762477	3	3	antisense	NGG	TGGGATGGAAGACTGGATAG	5	RNA2	AD49ZG	RGEN-seq
chr7:50819104-50819123	50819106	189	189	antisense	NGG	ACTACTGGAAAGCTGGAAAG	5	RNA2	AD49ZG	RGEN-seq
chr7:50964770-50964789	50964772	108	108	antisense	NGG	TTGTCTGAAAGACTTGAAAA	5	RNA2	AD49ZG	RGEN-seq
chr7:52081799-52081818	52081815	11	11	sense	NGG	TTTGATTAAAGATTGGAAGG	5	RNA2	AD49ZG	RGEN-seq
chr7:53760129-53760148	53760131	251	250	antisense	NGG	ACTGCAGAAAAACTAGAAAA	5	RNA2	AD49ZG	RGEN-seq
chr7:55688199-55688218	55688201	34	34	antisense	NGG	TCTGCTTGTAGAATGGAGAG	5	RNA2	AD49ZG	RGEN-seq
chr7:57299410-57299429	57299426	12	12	sense	NAG	AATGCTGAGAGATTGGAGAG	5	RNA2	AD49ZG	RGEN-seq
chr7:59639093-59639112	59639109	12	12	sense	NGG	GCTATTGAACAACTGGAAAG	5	RNA2	AD49ZG	RGEN-seq
chr7:61984373-61984392	61984375	16	16	antisense	NGG	ACTTCTGTAAGAATGGAATG	5	RNA2	AD49ZG	RGEN-seq
chr7:64681077-64681096	64681093	10	10	sense	NAG	TTTACTTAAAGACGGGAAAG	4	RNA2	AD49ZG	RGEN-seq
chr7:65106090-65106109	65106092	21	20	antisense	NGG	TCTACATACAGAATGGAAAG	5	RNA2	AD49ZG	RGEN-seq
chr7:66220421-66220440	66220423	5	5	antisense	NAG	TGAGCTGCTAGATTGGAAAG	5	RNA2	AD49ZG	RGEN-seq
chr7:66560246-66560265	66560248	29	29	antisense	NAG	ACTGAAAAATGACTGGAAAG	5	RNA2	AD49ZG	RGEN-seq
chr7:73206827-73206846	73206829	115	114	antisense	NGG	AATGCTCAAAGACAGGAAAC	5	RNA2	AD49ZG	RGEN-seq
chr7:73502591-73502610	73502607	6	6	sense	NGG	CCTGCTGTAAGAGAGGAAAC	5	RNA2	AD49ZG	RGEN-seq
chr7:73740894-73740913	73740896	12	12	antisense	NGG	TGGGGTGGAAGACTGGAAAG	4	RNA2	AD49ZG	RGEN-seq
chr7:73763348-73763367	73763350	38	38	antisense	NAG	ACAGATGAGAGACTGAAAAG	5	RNA2	AD49ZG	RGEN-seq
chr7:76495625-76495644	76495627	23	23	antisense	NGG	CCTGCTGCAATACTGGCTAG	5	RNA2	AD49ZG	RGEN-seq
[truncated: 3,455 more rows]

## Sheet: RGEN-seq
Chr:Start-End	Cutsite	Score	Cutsite Ends	Strand	PAM	Guide sequence	Mismatches	sgRNA	Cell Line	Method
chr13:65539858-65539877	65539860	87	87	antisense	NAG	AAGTCTCAGAAGAAGAAAAA	5	EMX1	HEK293	RGEN-seq
chr3:149366196-149366215	149366212	83	82	sense	NGG	CTGTCCAAGCACAAGAACAA	5	EMX1	HEK293	RGEN-seq
chr1:23394122-23394141	23394124	82	82	antisense	NGG	AAGTCCGAGGAGAGGAAGAA	3	EMX1	HEK293	RGEN-seq
chr1:27586863-27586882	27586879	80	80	sense	NGG	AGGTCAGAGCAGAAGAAAAG	5	EMX1	HEK293	RGEN-seq
chr1:21254468-21254487	21254470	78	78	antisense	NGG	TCTTCCAAGCAGAGGAAGAA	5	EMX1	HEK293	RGEN-seq
chr9:124547223-124547242	124547225	77	77	antisense	NGG	AAGCCCAAGCAAATGAAGAA	5	EMX1	HEK293	RGEN-seq
chr1:151055119-151055138	151055121	76	75	antisense	NAG	TTCTCCAAGCAGAAGAAGAA	4	EMX1	HEK293	RGEN-seq
chr7:142272740-142272759	142272742	76	76	antisense	NGG	AAGTCCGGGCAAAAGAGGAA	4	EMX1	HEK293	RGEN-seq
chrX:136114637-136114656	136114639	76	58	antisense	NAG	CATTCCAAGCAGAAGGAACA	6	EMX1	HEK293	RGEN-seq
chrX:133425038-133425057	133425040	75	75	antisense	NGG	AAATCCAAGTAGAAGAAGCA	5	EMX1	HEK293	RGEN-seq
chr3:13413678-13413697	13413694	74	74	sense	NGG	AGGCCCGAGCAGGAGAAAAT	6	EMX1	HEK293	RGEN-seq
chr1:33140876-33140895	33140878	70	67	antisense	NGG	GAGCCTGAGCAGAAGGAGAA	3	EMX1	HEK293	RGEN-seq
chr6:9118563-9118582	9118565	67	67	antisense	NGG	ACGTCTGAGCAGAAGAAGAA	3	EMX1	HEK293	RGEN-seq
chr7:156467089-156467108	156467105	67	51	sense	NAG	CCGACAGAGCAGAAGGAGAA	5	EMX1	HEK293	RGEN-seq
chr10:89656388-89656407	89656404	67	66	sense	NGG	ATGTCCAAGCAGAAGAAGTC	5	EMX1	HEK293	RGEN-seq
chr10:61945013-61945032	61945015	65	64	antisense	NGG	AAGTCCCAGCAACAGAAGAA	4	EMX1	HEK293	RGEN-seq
chr2:72933853-72933872	72933869	64	64	sense	NGG	GAGTCCGAGCAGAAGAAGAA	0	EMX1	HEK293	RGEN-seq
chr7:111835390-111835409	111835392	62	62	antisense	NGG	GAGCCCAAGCACAAAAAGAA	4	EMX1	HEK293	RGEN-seq
chr11:43726382-43726401	43726398	62	62	sense	NGG	AAGCCCGAGCAAAGGAAGAA	4	EMX1	HEK293	RGEN-seq
chr6:22780709-22780728	22780711	61	57	antisense	NGG	TCTTCCAAGCAGAAGGAGGA	6	EMX1	HEK293	RGEN-seq
chr10:126391610-126391629	126391626	60	60	sense	NGG	GAGTACAAGCAGATGAAAAA	4	EMX1	HEK293	RGEN-seq
chr3:57606140-57606159	57606156	59	59	sense	NGG	AAGTCCAAGCACAAGAAACA	5	EMX1	HEK293	RGEN-seq
chr6:110170194-110170213	110170210	59	59	sense	NGG	AAGTCAGAGCAGAAAAAGAG	4	EMX1	HEK293	RGEN-seq
chr8:127788996-127789015	127789012	59	51	sense	NAG	GAGTCCTAGCAGGAGAAGAA	2	EMX1	HEK293	RGEN-seq
chr10:57088952-57088971	57088968	59	59	sense	NGG	GAGCACGAGCAAGAGAAGAA	4	EMX1	HEK293	RGEN-seq
chr18:38075254-38075273	38075256	59	35	antisense	NGG	AGGTCTGAGCAGAGGAAGAT	5	EMX1	HEK293	RGEN-seq
chr4:53785399-53785418	53785401	57	43	antisense	NAG	CATTCCAAGCAGCAGAAGAA	4	EMX1	HEK293	RGEN-seq
chr7:43219437-43219456	43219453	56	55	sense	NGG	GATACCGAGCTAAAGAAGGA	5	EMX1	HEK293	RGEN-seq
chr19:24067698-24067717	24067700	54	54	antisense	NGG	GAGTCCAAGCAGTAGAGGAA	3	EMX1	HEK293	RGEN-seq
chr1:209758238-209758257	209758254	53	53	sense	NGG	TTATCCGAGAAGAAGAAGTA	5	EMX1	HEK293	RGEN-seq
chr5:16467309-16467328	16467311	53	53	antisense	NGG	TGTTCCAAGCAGAAGAGTAA	6	EMX1	HEK293	RGEN-seq
chrX:149881915-149881934	149881931	52	39	sense	NAG	GGAGTCAAGGAGAAGAAGAA	6	EMX1	HEK293	RGEN-seq
chr12:113664381-113664400	113664397	51	51	sense	NGG	AGGTCTGAGCAGAAGAAAGA	5	EMX1	HEK293	RGEN-seq
chr12:102349949-102349968	102349951	50	45	antisense	NAG	TAGTCAGAGCAGATGAAGGA	4	EMX1	HEK293	RGEN-seq
chr19:51113350-51113369	51113352	50	43	antisense	NAG	AGGTCTGAGCAGAAGAGGAA	4	EMX1	HEK293	RGEN-seq
chr3:95971339-95971358	95971341	49	49	antisense	NAG	TCATCCAAGCAGAAGAAGAA	4	EMX1	HEK293	RGEN-seq
chr7:70644964-70644983	70644980	49	49	sense	NGG	GAATCAGAGCAAAAGGAGAA	4	EMX1	HEK293	RGEN-seq
chr4:48637374-48637393	48637390	48	48	sense	NAG	CACTCCAAGTAGAAGAAGAA	4	EMX1	HEK293	RGEN-seq
chr11:69845566-69845585	69845582	47	46	sense	NGG	CAGTCCATGCAGAGGGAAGA	7	EMX1	HEK293	RGEN-seq
chr12:106252296-106252315	106252312	47	47	sense	NGG	AAGTCCATGCAGAAGAGGAA	4	EMX1	HEK293	RGEN-seq
chr14:48462900-48462919	48462916	47	47	sense	NAG	GAGTCCCAGCAAAAGAAGAA	2	EMX1	HEK293	RGEN-seq
chr2:218980334-218980353	218980350	46	46	sense	NGG	GAGGCCGAGCAGAAGAAAGA	3	EMX1	HEK293	RGEN-seq
chr3:124052893-124052912	124052909	46	46	sense	NGG	CATTCCTAGCAGAGGAAGAA	4	EMX1	HEK293	RGEN-seq
chr5:120959038-120959057	120959040	46	46	antisense	NGG	ATGTCCAAGCACAAGAGGAA	5	EMX1	HEK293	RGEN-seq
chr15:99752257-99752276	99752273	46	46	sense	NGG	AAGTCCCGGCAGAGGAAGAA	4	EMX1	HEK293	RGEN-seq
chr2:217513382-217513401	217513384	45	43	antisense	NGG	GAGTCTAAGCAGGAGAATAA	4	EMX1	HEK293	RGEN-seq
chr3:42227771-42227790	42227787	45	45	sense	NGG	CATTCCAAGCAGAGGAAGGA	5	EMX1	HEK293	RGEN-seq
chr11:62597798-62597817	62597800	45	45	antisense	NAG	GAATCCAAGCAGAAGAAGAG	3	EMX1	HEK293	RGEN-seq
chr19:55578147-55578166	55578149	45	43	antisense	NGG	AAGGCCGAGCAGGAGGAAGA	6	EMX1	HEK293	RGEN-seq
chr10:111395228-111395247	111395244	44	26	sense	NAG	GACATGGAGCAGAAGGAGAA	5	EMX1	HEK293	RGEN-seq
chrX:149493172-149493191	149493188	44	32	sense	NAG	TGAGCCCAGCAGGGGAAGAA	7	EMX1	HEK293	RGEN-seq
chr14:42687601-42687620	42687603	43	43	antisense	NGG	GAGGCCAAGCAGAAAAAAAA	4	EMX1	HEK293	RGEN-seq
chr16:73143823-73143842	73143839	43	42	sense	NAG	TCTTCCGAGCTGAAGAAGAA	4	EMX1	HEK293	RGEN-seq
chr7:31861461-31861480	31861463	42	41	antisense	NGG	GAGGCCAAGCAGAAAGAAAA	5	EMX1	HEK293	RGEN-seq
chr10:5359808-5359827	5359824	42	42	sense	NGG	TAATCCAATCAGAAGAAGAA	4	EMX1	HEK293	RGEN-seq
chr5:9227034-9227053	9227050	41	41	sense	NGG	AAGTCTGAGCACAAGAAGAA	3	EMX1	HEK293	RGEN-seq
chr5:119482108-119482127	119482110	41	41	antisense	NAG	GAACCCGAGAAGAAGAAAAA	4	EMX1	HEK293	RGEN-seq
chr13:75841737-75841756	75841753	41	35	sense	NAG	GAACCCGAGCAGGAGAAGAG	4	EMX1	HEK293	RGEN-seq
chr1:993988-994007	993990	40	30	antisense	NAG	CAATCCTGGCAGAAGGAGAA	5	EMX1	HEK293	RGEN-seq
chr1:201648156-201648175	201648158	40	39	antisense	NGG	AGCTCCGAGCAGAGGAAGGA	5	EMX1	HEK293	RGEN-seq
chr8:119575258-119575277	119575260	40	40	antisense	NGG	AAGGCCAAGCAGAAGAGTAA	5	EMX1	HEK293	RGEN-seq
chr14:75257202-75257221	75257204	40	40	antisense	NGG	AGTTCCAAGCAGAGGAAGAA	5	EMX1	HEK293	RGEN-seq
chr4:60084915-60084934	60084931	39	39	sense	NGG	TATTCCAAGCAAAAGAAAAA	5	EMX1	HEK293	RGEN-seq
chr4:86335536-86335555	86335538	39	39	antisense	NGG	GAGTAAGAGAAGAAGAAGAA	3	EMX1	HEK293	RGEN-seq
chr21:23295418-23295437	23295420	39	31	antisense	NAG	CCCTCCAAGCAGAAGAAGAT	5	EMX1	HEK293	RGEN-seq
chr2:199557428-199557447	199557430	38	38	antisense	NAG	GAAGCCAAGCAGAAGAAAAA	4	EMX1	HEK293	RGEN-seq
chr6:99251283-99251302	99251285	38	37	antisense	NGG	GAGTTAGAGCAGAGGAAGAG	4	EMX1	HEK293	RGEN-seq
chr1:193051789-193051808	193051791	37	37	antisense	NGG	GAGCCCAAGTAGAAGAAATA	5	EMX1	HEK293	RGEN-seq
chr7:95004089-95004108	95004091	37	37	antisense	NAG	AAAGTCAAGCAGAAGAAGAA	5	EMX1	HEK293	RGEN-seq
chr12:69933715-69933734	69933717	37	37	antisense	NGG	GAATCCCAGCAGGAGAAGAC	4	EMX1	HEK293	RGEN-seq
chr12:119548123-119548142	119548125	37	37	antisense	NGG	GACTCCTAGCAAAAGAAGAA	3	EMX1	HEK293	RGEN-seq
chr22:22466356-22466375	22466372	37	35	sense	NGG	GAGTCCCAGCAGAAGGACGA	4	EMX1	HEK293	RGEN-seq
chr2:217778299-217778318	217778301	36	32	antisense	NGG	TTGTCCCAGCAGAAGAAAGA	5	EMX1	HEK293	RGEN-seq
chr7:101251958-101251977	101251960	36	36	antisense	NGG	CGCTCCGAGCAGAAGAAAAG	5	EMX1	HEK293	RGEN-seq
chr1:220847360-220847379	220847362	35	35	antisense	NGG	GAGTAGGAGCAGATGAAGAG	4	EMX1	HEK293	RGEN-seq
chrX:116667629-116667648	116667645	35	35	sense	NGG	TGGTCCATGCAGAAAAAGAA	5	EMX1	HEK293	RGEN-seq
chrX:148639751-148639770	148639767	35	35	sense	NAG	GAGTCCAAAAGAAAGAAGAA	5	EMX1	HEK293	RGEN-seq
chr5:11216424-11216443	11216440	34	34	sense	NAG	GAGTCAGAACAGAAGAACAA	3	EMX1	HEK293	RGEN-seq
chr1:12396066-12396085	12396082	33	33	sense	NAG	CAGTCTGAGCAGGAGAAAAA	4	EMX1	HEK293	RGEN-seq
chr5:83013994-83014013	83014010	33	33	sense	NGG	AAGTCCAAGCATAAGAAAAC	5	EMX1	HEK293	RGEN-seq
chr5:147453624-147453643	147453626	33	33	antisense	NGG	GAGCCGGAGCAGAAGAAGGA	3	EMX1	HEK293	RGEN-seq
chr11:5884330-5884349	5884332	33	30	antisense	NGG	TATTCCTAGCAGGAGGAAGA	7	EMX1	HEK293	RGEN-seq
chrX:73741863-73741882	73741879	33	33	sense	NGG	TAATCAGAGCACAAGAAGAT	5	EMX1	HEK293	RGEN-seq
chr1:151748885-151748904	151748887	32	32	antisense	NAG	GAGTCCCAGAAGAAGAAAAA	3	EMX1	HEK293	RGEN-seq
chr5:149450919-149450938	149450921	32	26	antisense	NGG	CAGACCCAGCAGAAGGAAGA	6	EMX1	HEK293	RGEN-seq
chr7:3773146-3773165	3773148	32	32	antisense	NGG	GAGTCCTAGAAAAAGAAGAG	4	EMX1	HEK293	RGEN-seq
chr8:134085813-134085832	134085829	32	32	sense	NGG	CAGTCCAGCAGGAAGAAGAG	7	EMX1	HEK293	RGEN-seq
chr14:22133283-22133302	22133285	32	31	antisense	NAG	ATTTCCAAGCAGAAGGAGAA	5	EMX1	HEK293	RGEN-seq
chr14:97553663-97553682	97553679	32	32	sense	NAG	CATTCCAAGCAGAAGGAAGA	6	EMX1	HEK293	RGEN-seq
chr16:76730860-76730879	76730876	32	32	sense	NGG	ACAACCGAGCAGGAGAAGAG	6	EMX1	HEK293	RGEN-seq
chr16:78814950-78814969	78814952	32	32	antisense	NGG	AAATCCAACCAGAAGAAGAA	4	EMX1	HEK293	RGEN-seq
chr2:65555376-65555395	65555392	31	30	sense	NGG	GACTCCGAGCAGCAGAAGGA	3	EMX1	HEK293	RGEN-seq
chr4:180592736-180592755	180592738	31	30	antisense	NGG	CTGTCCAAGCAGAAAATAAA	6	EMX1	HEK293	RGEN-seq
chr6:960805-960824	960821	31	30	sense	NGG	AAATCCAACCAGAAGAAGAG	5	EMX1	HEK293	RGEN-seq
chr7:19417522-19417541	19417524	31	30	antisense	NGG	ATCTCCAAGCAGAAGAAAAA	5	EMX1	HEK293	RGEN-seq
chr8:26643117-26643136	26643133	31	31	sense	NGG	CCATCCGAGCAGGAGATTAA	6	EMX1	HEK293	RGEN-seq
chr12:73110892-73110911	73110894	31	31	antisense	NGG	GAGTTAGAGCAGAAAAAAAA	4	EMX1	HEK293	RGEN-seq
chr20:50256884-50256903	50256886	31	31	antisense	NAG	AAGCCCGGGCAGAAGAAGCA	4	EMX1	HEK293	RGEN-seq
chr4:8246878-8246897	8246880	30	30	antisense	NGG	GAGACCAAGCAACAGAAGAA	4	EMX1	HEK293	RGEN-seq
chr4:25059122-25059141	25059124	30	30	antisense	NGG	GTGTCAGAGCAGAAAAAGAG	4	EMX1	HEK293	RGEN-seq
chr5:45358962-45358981	45358964	30	30	antisense	NGG	GAGTTAGAGCAGAAGAAGAA	2	EMX1	HEK293	RGEN-seq
chr6:152838438-152838457	152838454	30	30	sense	NAG	AAGTCTGAGCAGAAGAAGCA	3	EMX1	HEK293	RGEN-seq
chr7:151755383-151755402	151755399	30	30	sense	NGG	GAGCCTGAGCAGAGGAAGAC	4	EMX1	HEK293	RGEN-seq
chr15:43817549-43817568	43817565	30	30	sense	NAG	GAGTCTAAGCAGAAGAAGAA	2	EMX1	HEK293	RGEN-seq
chr1:87734166-87734185	87734182	29	29	sense	NGG	CAATCAGAGCAGGAGAAGAG	5	EMX1	HEK293	RGEN-seq
chr6:12210598-12210617	12210600	29	23	antisense	NAG	ATGAATGAGCAGAAGGAGGA	7	EMX1	HEK293	RGEN-seq
chr12:96660188-96660207	96660204	29	29	sense	NGG	GTAGCCCAAGAGAAAAAGAA	7	EMX1	HEK293	RGEN-seq
chrX:119720889-119720908	119720905	29	28	sense	NAG	TGGTCCAAGCAGGAGAAGAT	5	EMX1	HEK293	RGEN-seq
chr3:13713803-13713822	13713819	28	28	sense	NAG	GTGGCCGAGTAGAAAGAAGA	7	EMX1	HEK293	RGEN-seq
chr9:34735038-34735057	34735054	28	22	sense	NGG	AAGTCCTAGCAGAAGGAAAG	5	EMX1	HEK293	RGEN-seq
chr15:48230043-48230062	48230045	28	28	antisense	NGG	GAATCCTAGCAGAATAAAAA	4	EMX1	HEK293	RGEN-seq
chr20:23536051-23536070	23536053	28	28	antisense	NGG	GAATCCCAGCAGGAGAGGAA	4	EMX1	HEK293	RGEN-seq
chrX:39111951-39111970	39111953	28	26	antisense	NAG	GAGTCCCAGAAGAAGAAAGA	4	EMX1	HEK293	RGEN-seq
chr1:165384420-165384439	165384422	27	27	antisense	NGG	GAGTCAAGCAAGAGGAAGAA	6	EMX1	HEK293	RGEN-seq
chr2:14805767-14805786	14805769	27	27	antisense	NGG	AAGTCCAGGCAGGAGAAAAA	5	EMX1	HEK293	RGEN-seq
chr2:104638919-104638938	104638935	27	27	sense	NGG	TGGTCTGAGCAGAAGATAAA	5	EMX1	HEK293	RGEN-seq
chr3:54950701-54950720	54950703	27	27	antisense	NGG	ACAGCCGAGCAGTAAAAGAA	6	EMX1	HEK293	RGEN-seq
chr4:164607115-164607134	164607131	27	27	sense	NGG	TTGTCTGAGCAGGAAAAGAA	5	EMX1	HEK293	RGEN-seq
chr5:108972181-108972200	108972197	27	27	sense	NGG	TAGTTCAAGCAGAAGAAAAG	5	EMX1	HEK293	RGEN-seq
chr10:92663298-92663317	92663300	27	24	antisense	NGG	GAGTCCTAGTAGAAGAGAAA	4	EMX1	HEK293	RGEN-seq
chr16:89282415-89282434	89282417	27	27	antisense	NGG	AAGGCCGAGAAGAAAGAGAA	5	EMX1	HEK293	RGEN-seq
chr17:56343679-56343698	56343681	27	27	antisense	NGG	GAGTCCCAGGAGAAGAAGAG	3	EMX1	HEK293	RGEN-seq
chr1:20893400-20893419	20893402	26	18	antisense	NAG	CTAGTCAAGAAGAAGAAGAA	7	EMX1	HEK293	RGEN-seq
chr2:199054747-199054766	199054763	26	26	sense	NGG	GAGTCAGAGCAGAACTAGAA	3	EMX1	HEK293	RGEN-seq
chr8:101232307-101232326	101232323	26	25	sense	NGG	AGTTCCAAGCAGAAGAAGCA	5	EMX1	HEK293	RGEN-seq
chrX:68185856-68185875	68185872	26	26	sense	NGG	GAGTTCAAGCAGATGAAATA	5	EMX1	HEK293	RGEN-seq
chr1:34919984-34920003	34920000	25	25	sense	NGG	GAAGTGGAGCAGGAGAAGAA	5	EMX1	HEK293	RGEN-seq
chr1:235679373-235679392	235679375	25	25	antisense	NGG	GAACCCAAGCAGAAAAGGAA	5	EMX1	HEK293	RGEN-seq
chr4:173977665-173977684	173977667	25	25	antisense	NGG	TGATCCAAGCAGGAGAAAAA	6	EMX1	HEK293	RGEN-seq
chr5:54670679-54670698	54670681	25	17	antisense	NAG	CAATCCGGGCAGAAGAAGGA	4	EMX1	HEK293	RGEN-seq
chr5:95027840-95027859	95027856	25	25	sense	NAG	GAGACCGAGCAAAATAAGCC	5	EMX1	HEK293	RGEN-seq
chr5:119211554-119211573	119211556	25	25	antisense	NAG	AAGTCATAGCAGAAGAAGGA	4	EMX1	HEK293	RGEN-seq
chr6:88867689-88867708	88867705	25	25	sense	NAG	GAGTACTAGAAGAAGAAGAA	3	EMX1	HEK293	RGEN-seq
chr18:37326796-37326815	37326798	25	25	antisense	NGG	GAGCCTGAGCGGAAGAGGAA	4	EMX1	HEK293	RGEN-seq
chr18:37931042-37931061	37931044	25	25	antisense	NGG	TTTACCAAGCAGAAAAAGAA	6	EMX1	HEK293	RGEN-seq
chr3:106354639-106354658	106354641	24	24	antisense	NAG	TGGTCAGAGCAGAAGAAATA	5	EMX1	HEK293	RGEN-seq
chr9:126864393-126864412	126864395	24	24	antisense	NGG	CTTTCCAAGCAGGAGAGGAA	6	EMX1	HEK293	RGEN-seq
chr21:18016448-18016467	18016464	24	24	sense	NAG	ATGTCCAGGCAGAAGAAAAA	5	EMX1	HEK293	RGEN-seq
chr3:50502575-50502594	50502577	23	23	antisense	NGG	GGGTCCGGGCAGAAGGTGAA	4	EMX1	HEK293	RGEN-seq
chr10:118093212-118093231	118093228	23	17	sense	NAG	ATGCATGAGCAGAGGAAGAA	6	EMX1	HEK293	RGEN-seq
chr11:30280259-30280278	30280261	23	23	antisense	NGG	CAGTCTGAGTAGAAGAAAAA	4	EMX1	HEK293	RGEN-seq
chr17:76881473-76881492	76881489	23	23	sense	NGG	GAGGCCGGGCAGGAGAAGGA	4	EMX1	HEK293	RGEN-seq
chrX:80157789-80157808	80157805	23	23	sense	NAG	AAAGCCAAGCAGAAGAAAAA	5	EMX1	HEK293	RGEN-seq
chr1:179055653-179055672	179055669	22	22	sense	NGG	GAGTCCAAGAAGAAGAAGCC	4	EMX1	HEK293	RGEN-seq
[truncated: 2,951 more rows]

## Sheet: SITE-seq
Chr:Start-End	Cutsite	Score	Cutsite Ends	Strand	PAM	Guide sequence	Mismatches	sgRNA	Cell Line	Method
[truncated: 1,962 more rows]

[truncated: 2 more sheets: CHAGE-seq, CIRCLE-seq]
